# Supplementary material for: Comparative Hippocampal Synaptic Proteomes of Rodents and Primates: Differences in Neuroplasticity-Related Proteins
Source: Front Mol Neurosci. 2018 Oct 2;11:364. doi: 10.3389/fnmol.2018.00364 (PMC6176546; doi:10.3389/fnmol.2018.00364)
Supplement: TABLE S1 — Protein iBAQ abundance values for discovery proteomics (DDA) measurements of mouse, rat, marmoset and human synaptosomes used for the spectral library. [file Table_1.XLS]

## Sheet: sTable1
	iBAQ.human	iBAQ.marmo	iBAQ.mouse	iBAQ.rat
A2M	31.466	0	0	0
AAK1	3005.3	2483.1	6249.4	5199.9
AARS	3532	348.27	222.28	330.64
AARS2	80.991	232.4	0	0
AASDHPPT	227.25	0	0	0
ABAT	3131.1	1130.8	3034.7	6639.2
ABCA2	13.4	0	0	12.426
ABCB10	0	94.757	0	0
ABCB11	0	0	4059.4	2634.4
ABCB6	16.024	0	0	0
ABCB7	145.52	571.66	522.66	183.21
ABCB8	521.43	1535.7	105.56	442.81
ABCC4	12.114	0	0	0
ABCD2	50.22	85.087	0	48.712
ABCD3	494.55	313.94	482.93	209.09
ABCE1	445.99	197.45	88.639	435.4
ABCF2	344.82	132.66	159.52	1.5656
ABCF3	67.221	0	0	0
ABCG2	0	49.346	271.14	0
ABHD10	2025.4	424.96	0	0
ABHD11	732	0	0	0
ABHD12	1945.4	1691.3	1901.3	549.1
ABHD14B	192.76	133.96	0	267.22
ABHD16A	661.78	389.41	613.53	681.99
ABHD17A	1.4038	0	202.99	114.06
ABHD6	159.59	1069.2	158.93	127.47
ABI1	714.13	5018.1	4545.1	4847.5
ABI2	1363.6	6724.9	2175.8	1434.8
ABL2	89.94	16.991	0	50.091
ABLIM1	1048.4	345.43	529.38	447.18
ABLIM2	668.509	349.908	0	0
ABLIM3	0	50.54	74.131	0
ABR	3623.8	1015.1	1089.4	2257.6
ACAA1	2671.3	2659.9	0	826.58
ACAA2	476.77	165.02	27.286	0
ACACA	271.62	23.848	10.431	16.299
ACAD8	102.12	197.24	1262.9	1135.5
ACAD9	385.45	1027.1	219.28	329.02
ACADL	0	0	265.16	0
ACADSB	205.79	0	170.22	0
ACADVL	1884.9	1437.6	795.88	128.8
ACAN	560.04	155.78	226.93	431.64
ACAP2	88.379	0	33.162	23.915
ACAP3	15.653	0	0	0
ACAT1	8893.8	2797.9	2928.2	3739.3
ACBD5	0	27.853	0	0
ACHE	0	0	221.14	173.62
ACLY	1087.5	1147.4	2235.9	3425.9
ACO1	0	146.79	123.69	56.136
ACO2	21291	16040	29085	37544
ACOT11	0	0	0	74.507
ACOT13	8908.4	0	864.04	0
ACOT7	2658.2	1425.6	6135.9	3543.1
ACOT8	480.95	0	0	0
ACOT9	1510.8	268.85	316.2	1261.7
ACOX1	131.44	0	0	0
ACP1	0	1562.1	0	0
ACP2	252.48	81.35	119.78	47.622
ACSBG1	538.88	605.22	684.18	882.66
ACSF2	126.14	0	0	0
ACSF3	734.02	0	3.021	0
ACSL1	465.69	592.94	277.74	323.88
ACSL3	1346.5	661.3	443.93	76.51
ACSL4	152.78	180.35	288.75	247.71
ACSL6	2877.1	2803	1540.7	2224.1
ACSS1	31.349	0	0	0
ACSS2	40.688	32.709	0	0
ACSS3	0	0	0	0
ACTBL2	488.74	0	1987	1612.9
ACTL6B	140	0	0	7.845
ACTN1	4052.4	3299.8	3726.9	4507.9
ACTN2	1386.3	1997.01	398.635	896.58
ACTN4	1231.89	299.6	1116.26	1294.52
ACTR10	617.89	246.25	904.12	423.77
ACTR1A	2735.1	3893.9	4396	6369.7
ACTR1B	489.32	1481.3	2558.6	3007.7
ACTR2	5449.3	7896.1	13934	11042
ACTR3	3567.8	7527.3	16528	17082
ACTR3B	728.37	1886	4493.9	2518.5
ACVR1	0	167.97	0	132.19
ACVR1C	0	0	0	0
ACYP1	0	0	1771.5	0
ACYP2	3613.8	751.78	0	1626.4
ADAM10	413.72	271.13	133.77	150.77
ADAM11	315.39	1511.1	2634.7	1056
ADAM22	1778.8	713.3	850.49	480.79
ADAM23	1218.2	470.66	1811.9	2096.6
ADAMTS14	0	0	396.26	0
ADAMTSL4	0	798.72	0	0
ADAP1	1073	301.55	374.22	846.72
ADCK1	88.3	0	0	0
ADCK3	106.06	37.933	0	0
ADCK5	58.286	100.44	0	0
ADCY1	212.71	70.2	123	78.678
ADCY2	231.78	321.93	334.27	66.333
ADCY3	9.0593	0	52.814	47.528
ADCY5	52.152	0	55.155	0
ADCY8	61.185	17.359	16.123	22.481
ADCY9	182.13	206.44	1009.6	1175.8
ADD1	7367.2	5953	5472.5	6044.1
ADD2	2118.5	2876.6	2114.5	2291.3
ADD3	3300	2694.7	1590.2	1965.9
ADGRA1	256.85	0	0	0
ADGRB2	120.55	248.16	63.771	111.67
ADGRB3	232.9	526.73	629.65	437.26
ADGRL1	1515.3	1493.5	1566.6	1342.8
ADGRL2	0	0	1940.3	1732.5
ADGRL3	434.13	466.92	221.35	169.04
ADH5	215.16	204.55	94.477	735.04
ADK	393.83	686.99	287.94	184.58
ADORA1	619.09	0	0	0
ADPGK	97.99	0	0	0
ADRBK1	239.2	610.35	478.9	285.21
ADRBK2	0	49.521	0	0
ADRM1	0	119.17	137.62	0
ADSS	0	40.199	534.27	248.39
ADSSL1	0	0	0	0
AFG3L2	3273.3	2889.2	1434.4	3148.3
AGAP1	66.583	90.965	29.732	49.475
AGAP2	1206.9	1383.4	1673.96	1139.32
AGAP3	2118.66	1314.7	1303.4	1562.38
AGBL4	0	0	145.1	0
AGFG1	1346.7	532.64	276.66	280.14
AGFG2	325.38	0	327.33	68.627
AGK	5931.5	8953.1	3455.7	2651.4
AGL	11.139	75.028	72.292	168.24
AGPAT1	925.58	449.75	1168.6	1420.8
AGPAT3	172.12	6127.9	160.28	0
AGPAT4	0	0	0	0
AGPAT5	861.47	362.04	94.982	154.19
AGPS	107.81	189.71	0	0
AHCY	733.75	3030.6	2493.2	5062.5
AHCYL1	7098.1	14341	14046	11304
AHCYL2	343.08	784.55	1253.9	960.44
AHNAK	880.31	367.32	149.49	263.11
AHNAK2	157.13	9.1508	20.11	0
AHSA1	1830.7	383.28	1237.8	645.77
AIDA	0	0	341.33	180.95
AIFM1	1934.3	3651.5	1276.9	1211.8
AIFM3	215	112.27	50.324	213.33
AIMP1	187.16	0	166.52	22.825
AIP	1217.8	0	128.1	0
AJAP1	0	377.92	0	47.059
AK1	3489.4	2700.6	2269.4	3614.5
AK2	60.162	507.24	155.94	289.31
AK3	1347.3	953.97	215.28	1798.1
AK4	8279.2	730.3	167.68	20.107
AK5	3438.6	2913.5	253.35	1007.9
AKAP1	24.817	0	0	0
AKAP10	102.38	0	185.63	84.239
AKAP12	1164.3	26.548	0	0
AKAP2	0	0	0	178.35
AKAP5	733.61	0	209.93	407.09
AKAP7	2417.2	2193.9	1720	3205
AKR1A1	682.54	230.82	3141.2	4150.7
AKR1B1	248.86	390.16	0	104.7
AKR1B15	0	0	28.721	0
AKT3	80.259	0	87.441	0
ALAD	602.64	0	0	0
ALB	3471.7	2282.1	972.14	949.04
ALCAM	2534.5	2662.3	2069.4	1136.2
ALDH18A1	0	23.328	165.76	40.274
ALDH1A1	140.82	89.576	0	0
ALDH1B1	926.82	17.491	709.61	2165.7
ALDH1L1	340.01	1810.4	622.02	399.34
ALDH2	5926.1	4676.6	2360.9	1969.3
ALDH3A2	2727.9	294.01	186.91	586.08
ALDH4A1	380.66	0	121.32	0
ALDH5A1	5292.2	1496.6	219.62	1076.3
ALDH6A1	15950	721.92	1046.2	564.83
ALDH7A1	3069.8	868.15	1084.3	654.23
ALDH9A1	295.94	58.444	132.23	707.31
ALDOA	107050	83780	98216	62278
ALDOC	40642	44193	40177	41919
ALG2	326.27	0	0	0
ALYREF	227.48	314.98	160.44	0
AMER2	12.745	0	0	0
AMIGO1	157.22	259.55	127.15	0
AMOT	64.177	129.53	0	0
AMPD2	95.833	350.64	871.91	805.4
AMPD3	0	0	46.783	382.1
AMPH	1133.4	4511.3	7141.9	10532
ANK1	341.21	247.64	234.14	259.4
ANK2	7095.82	5760.05	3855.3	4169.28
ANK3	2337.88	935.644	799.47	516.11
ANKFY1	265.99	10.597	172.65	138.44
ANKIB1	0	0	0	0
ANKMY2	1437.8	72.822	64.022	994.28
ANKRD13D	212.4	0	0	0
ANKRD28	0	0	0	0
ANKS1B	7121.19	9255.9	14599.3	11170
ANO10	48.289	37.898	0	0
ANO3	0	0	0	0
ANO6	131.87	0	0	0
ANO8	45.347	27.199	0	0
ANP32A	533.76	664.51	24.782	0
ANP32B	211.77	4.5548	924.57	126.28
ANXA1	2774.3	2319.3	0	0
ANXA11	5017.2	2637.9	698.65	2164.3
ANXA2	6903.2	1733.6	275.49	105.92
ANXA2P2	0	0	0	0
ANXA3	0	0	381.46	635.08
ANXA4	944.9	475.02	21.555	605.82
ANXA5	4980.2	2790.9	3677.7	3590.2
ANXA6	42508	12764	3192.1	3354.4
ANXA7	8225.2	3866.8	2848.6	976.03
AP1B1	509.48	469.31	957.67	1615.2
AP1G1	579.23	424.01	595.8	601.86
AP1G2	0	659.49	0	0
AP1M1	391.22	459.78	763.82	753.23
AP1S1	531.2	0	415.75	1002.9
AP2A1	8502.1	10226	19118	14963
AP2A2	3673.8	5192.78	11435.1	12848.8
AP2B1	14078	20763	34865	41888
AP2M1	13940	14091	22515	28571
AP2S1	9601.8	9613.7	20126	25812
AP3B1	45.627	0	0	0
AP3B2	1682.9	995.16	1542.7	2014.2
AP3D1	1721.1	1027.1	1634.2	1883.9
AP3M1	653.15	0	160.81	328.19
AP3M2	3059.6	1868.6	3002.7	1039.5
AP3S1	3223.29	284.21	486.36	1631.22
APBA1	147.91	44.67	53.393	0
APBA2	543.33	288.23	129.78	220.06
APBB1	367.72	164.67	44.011	58.176
APC	9.8336	14.766	9.6332	15.356
APEH	0	0	0	0
APEX1	0	0	111.65	0
APLP2	23.349	198.6	0	103.97
APMAP	7172.2	2834.4	956.27	187.9
APOA1	0	0	0	0
APOA1BP	0	0	0	682.42
APOB	0	0	35.544	0.37741
APOC3	98.947	0	0	0
APOD	4091.3	0	1742.9	3316.2
APOE	1915.6	652.16	172.44	54.209
APOL2	647.77	0	2.0401	0
APOO	12351	2707.2	3731	679.94
APOOL	3280.4	401.2	4.1212	0
APP	273.95	663.55	340.83	398.27
APPL1	125.41	342.48	562.03	613.65
APPL2	144.23	133.48	74.099	199.15
APRT	197.73	50.866	0	920.85
AQP1	7868.5	0	0	0
AQP4	9623.8	3094.1	181.24	215.04
ARC	0	201.82	173.25	2.9517
ARCN1	425.06	134.43	0	31.917
ARF4	6280.6	1118.2	805.38	981.73
ARF5	733.97	340.35	1258.7	1881.6
ARF6	2991	684.08	1276.8	2422.6
ARFGAP1	2308.6	1183.5	1258	894.8
ARFGAP2	303.53	388.36	0	0
ARFGEF1	25.606	7.967	0	15.497
ARFGEF2	375.48	146.88	274.06	113.52
ARFGEF3	45.627	0	0	0
ARFIP2	12.303	0	1307.6	754.97
ARHGAP1	6290.9	524.16	2091	2040.6
ARHGAP21	257.16	220.08	171.47	271.44
ARHGAP23	24.837	0	0	32.123
ARHGAP26	528.9	284.27	127.4	140.83
ARHGAP32	119.3	197	182.41	107.44
ARHGAP39	66.783	207.82	208.67	243.76
ARHGAP44	2452.5	415	261.77	398.66
ARHGAP5	37.346	3.4006	4.4653	17.096
ARHGDIA	5094.1	6286.1	12427	13620
ARHGEF11	62.567	0	0	0
ARHGEF12	201.86	179.94	94.284	0
ARHGEF2	929.04	628.36	111.57	174.76
ARHGEF25	0	18.071	0	0
ARHGEF6	220.09	86.55	90.693	56.424
ARHGEF7	2227.4	666.45	739.88	1253.6
ARHGEF9	463.81	421.41	288.86	106.93
ARIH1	15.142	42.004	0	0
ARL1	197.63	0	0	0
ARL10	0	283.13	0	0
ARL15	1326.9	885.58	622.21	504.33
ARL3	2715.4	1069.8	1085	2711.8
ARL6	0	0	0	0
ARL6IP5	10809	2436.9	3305.6	2548
ARL8A	15194	3703.2	4604.1	16447
ARL8B	3174.7	2846.4	2966.7	5085.2
ARMC1	1540.9	1942.3	1002.9	2272.8
ARMC10	3278.2	1521.7	0	0
ARMC6	169.32	41.759	0	0
ARMCX3	119.13	128.04	326.04	301.48
ARPC1A	2734.8	4906	8264.5	8290.1
ARPC1B	0	0	0	0
ARPC2	3711.8	8443.7	13342	11983
ARPC3	7053.5	9725.3	16781	20300
ARPC5	969.59	2422.3	4699.6	5689.5
ARPC5L	3426	4912.5	6840.4	6948.1
ARPP19	0	352.37	0	1133.1
ARRB1	0	241.24	118.36	474.36
ARVCF	155.82	158.11	24.814	39.129
ASAH1	1610.4	0	210.91	0
ASAP1	333.11	149.12	344.31	147.67
ASAP2	0	0	10.155	0
ASIC1	0	0	0	67.811
ASMTL	26.373	0	0	0
ASNA1	4655.5	1116.1	647.68	1693.4
ASPA	0	169.74	93.649	109.98
ASPH	0	0	0	0
ASPHD1	0	0	0	0
ASRGL1	134.26	445.9	0	0
ASS1	275.31	1441.2	2099.9	549.8
ASTN1	456.7	468.34	323.24	399.86
ASTN2	20.609	28.722	39.163	0
ATAD1	1007.5	1656.6	2479.5	1834.1
ATAD3A	3805.6	1193.9	740.79	1598
ATAD3B	0	278.27	0	53.389
ATAT1	791.63	222.55	56.009	80.327
ATCAY	487.61	117.66	371.26	390.33
ATG13	120.76	0	0	0
ATG16L1	0	0	56.589	101.71
ATG2B	145.14	26.338	8.3462	10.747
ATG3	927.93	0	0	0
ATG5	465.21	164.78	190.12	218.38
ATG7	0	16.36	83.428	0
ATG9A	25.4	0	0	34.338
ATIC	3434.3	453.74	171.55	698.21
ATL1	8334.1	3443.5	1464.4	3676
ATL2	0	0	0	0
ATL3	210.44	58.273	0	95.384
ATP12A	21.217	31.692	21.093	0
ATP13A1	103.21	0	0	0
ATP1A1	46664	33574	19569	17773
ATP1A2	113890	116830	124060	193110
ATP1A3	94649	99785	138100	125960
ATP1B1	204200	95487	130930	169270
ATP1B2	20878	22080	14133	26490
ATP1B3	4393.6	1102.7	937.9	225.85
ATP2A2	14969	10209	11020	10178
ATP2B1	20037	21084	19820	18705
ATP2B2	20064.8	18831.2	24513.8	17174.4
ATP2B3	3961.4	5018.69	6542.68	4513.73
ATP2B4	9461.2	3707.3	0	636.68
ATP2C1	252.94	77.628	271.65	41.89
ATP4A	38.685	109.68	95.389	1.8236
ATP5A1	164650	202310	182970	156760
ATP5B	192350	223060	212330	274100
ATP5C1	31520	35453	17228	8903.5
ATP5D	18749	3850.7	1869.7	2650.1
ATP5F1	18931	5899.8	2234.7	292.27
ATP5H	76423	38944	6744.3	6359.5
ATP5I	79702	0	24912	35736
ATP5J	35379	937.09	260.48	0
ATP5J2	194240	102140	0	924.28
ATP5L	34268	3292.9	701	74.936
ATP5O	83337	40031	18910	32417
ATP5S	117.71	180.35	0	0
ATP6AP1	4089.3	2967.2	72.665	0
ATP6AP2	3227.1	2701.6	0	11.871
ATP6V0A1	45224.7	30760	33304	42204
ATP6V0C	98268.4	0	18.694	1235.9
ATP6V0D1	47230	40737	49053	66040
ATP6V0D2	0	0	0	709.67
ATP6V1A	29610	19656	32428	46029
ATP6V1B2	20648	16117	36205	49065
ATP6V1C1	7607.2	7065.4	14402	17538
ATP6V1D	9647.5	7944.2	18417	19414
ATP6V1E1	26519	20821	39704	52147
ATP6V1F	2711.2	5073	10794	5840
ATP6V1G1	2141.5	1409	2908.3	3928.5
ATP6V1G2	0	0	0	0
ATP6V1H	8936.7	5737.7	11476	18042
ATP8A1	8289.6	4661.2	3423.9	5019.3
ATP8A2	255.81	171.43	0	69.554
ATP9A	717.43	675.65	215.94	354.91
ATPAF1	1187.1	0	86.463	0
ATPIF1	344.97	977.6	0	0
ATRN	0	45.228	0	35.966
ATXN10	249.07	0	0	0
ATXN2	0	0	0	0
ATXN3	0	0	0	0
AUH	7203.4	8908	8007.1	13311
AVL9	173.92	67.957	60.889	74.177
B3GAT3	0	156.07	114.94	0
B4GALT6	0	0	0	0
B4GAT1	176.41	59.585	0	0
BAALC	174.31	178.29	232.6	115.01
BABAM1	0	0	120.31	98.868
BACE1	0	92.491	0	59.571
BAG3	13.23	14.753	0	0
BAG5	0	0	0	230.66
BAIAP2	6092.4	6095.9	6644.2	8365.9
BAIAP3	81.148	0	399.4	408.89
BASP1	13318	11970	0	0
BAX	0	0	0	0
BCAN	11619	4102.9	626	1462.1
BCAP29	409.81	0	0	0
BCAP31	1573.2	127.25	16.688	2.4562
BCAR1	164.99	23.051	0	0
BCAS1	1056.2	0	0	705.1
BCAS3	497.03	139.65	297.5	93.724
BCAT1	0	0	0	0
BCKDHA	986.5	305.34	0	171.51
BCKDK	367.44	1309.3	908.81	329.25
BCL2L13	64.195	1425.7	0	0
BCR	185.57	160.19	0	74.727
BCS1L	405.93	297.84	17.785	293.19
BDH1	6863.5	5880.1	7086.6	3030.9
BECN1	455.36	69.784	282.15	198.45
BEGAIN	167.15	720.79	157.25	69.313
BET1	0	0	0	0
BIN1	2221.7	2368.3	6939.7	10423
BLMH	0	154.96	560.21	240.66
BLVRA	104.78	0	91.879	211.93
BLVRB	1011.6	549.8	0	0
BMPR2	155.19	46.534	116.24	104.59
BNIP3L	224.67	0	0	76.406
BPGM	265.15	0	0	0
BPNT1	677.76	184.18	2147.1	2977.9
BRAF	1387.19	407.72	533.78	517.64
BRE	48.928	0	0	694.49
BRI3BP	0	733.27	120.77	0
BRINP1	234.49	744.93	1444.5	413.42
BRINP2	44.365	62.133	52.76	0
BRK1	117.61	283.73	401.8	0
BROX	0	0	0	0
BRSK1	1467.4	984.51	634.94	327.59
BRSK2	494.87	80.346	158.03	242.17
BSCL2	1864.2	237.67	0	0
BSDC1	0	74.027	0	0
BSG	17631	0	0	0
BSN	3150.4	3227.1	2132.3	2775.2
BTBD17	0	0	113.04	128.2
BTN3A3	319.71	0	0	0
C10ORF35	503.43	2146	0	0
C11ORF68	0	0	0	0
C11ORF73	0	0	0	0
C12ORF4	59.772	35.896	57.22	0
C12ORF57	852.98	330.15	372.54	683.71
C14ORF159	417.58	48.591	182.31	0
C14ORF166	630.88	918.8	35.718	149.13
C14ORF79	0	40.346	778.53	0
C16ORF45	1125.1	64.917	397.68	0
C16ORF58	1017.6	0	0	0
C16ORF70	871.3	27.71	69.708	108.63
C17ORF75	122.39	0	101.05	0
C18ORF8	0	0	0	0
C19ORF52	1567.3	0	8.2302	0
C1ORF198	189.8	65.534	74.313	34.892
C1ORF95	7629.9	20467	7843.9	18162
C1QBP	12478	2621.1	0	0
C1QC	144.12	0	0	0
C1QTNF4	0	125.53	151.52	194.02
C2CD2	224.57	45.891	0	0
C2CD2L	960.09	559.71	328.3	353.66
C2CD4C	85.535	0	0	0
C2CD5	462.73	67.212	29.808	18.917
C2ORF47	480.27	1317.6	235.1	545.5
C2ORF69	876.06	0	217.28	505.56
C2ORF88	1233.3	0	0	0
C3	11.854	0	0	0
C6ORF136	301.49	274.16	0	5.753
C6ORF203	197.89	0	0	0
C7ORF43	123.2	121.93	0	0
C9ORF172	417.22	567.58	344.83	228.64
CA2	442.53	635.76	0	0
CA4	2210.8	46.175	0	0
CAB39	494.2	646.91	688.17	916.7
CAB39L	0	105.63	63.609	169.16
CABLES2	20.821	0	0	0
CACHD1	12.664	145.86	0	0
CACNA1A	105.701	202.32	87.754	287.621
CACNA1B	76.39	160.21	20.537	60.703
CACNA1E	143.96	406.12	556.13	432.07
CACNA2D1	6928.4	5532.8	4534.5	3684.8
CACNA2D2	104.46	179.13	57.506	57.288
CACNA2D3	299.51	590.4	2148.6	728.02
CACNB1	351.89	145.59	891.48	647.95
CACNB2	141.23	182.76	95.268	234.7
CACNB3	406.08	331.27	432.36	1086.2
CACNB4	2281.8	1898.4	2983.5	2296.8
CACNG2	631.27	211.88	1104.8	1062.1
CACNG3	2396.5	1933.1	1223.5	1370.5
CACNG8	2684.1	2874.4	2556.8	2548.1
CACYBP	1379.8	2097.9	844.41	782.73
CAD	0	6.9288	7.0173	0
CADM1	2489.5	4544.2	4634.1	4841.3
CADM2	14642	12616	10303	9730.3
CADM3	22262	8242.1	4708.1	3345.1
CADM4	4676.9	6814.7	3040.7	2845.7
CADPS	4244.33	2419.42	12307	9711.4
CADPS2	2732.6	36.604	104.11	44.811
CALB1	0	1632.3	5053.6	5767.9
CALB2	0	1519.6	2568.4	2472.1
CALCOCO1	383.84	437.48	64.203	0
CALML3	0	0	78.649	0
CALML5	0	0	0	0
CALR	1705.6	1570.5	1359.5	1144.5
CALR3	0	0	0	0
CALU	732.18	1024	237.27	321.24
CAMK1	781.75	280.3	238.51	0
CAMK1D	11283	3418.6	3852.2	3387.4
CAMK1G	429.72	115.44	0	0
CAMK2A	168380	143033	86583	207540
CAMK2B	38259.6	43686.6	19785.4	59596.2
CAMK2D	8378.7	5474.9	1630.4	2664.27
CAMK2G	10022.9	9033.54	2473.95	9007.95
CAMK4	2601.6	696.3	252.75	188.96
CAMKK1	716.58	0	217.24	152.25
CAMKK2	1148.8	179.06	254.7	164.65
CAMKV	21224.4	17279	23011	11631
CAMLG	209.28	0	3953.9	4514.6
CAMSAP1	85.203	7.4411	14.737	0
CAMSAP2	134.23	19.122	11.229	0
CAMSAP3	249.02	103.27	113.69	46.539
CAND1	974.89	2148.2	4012.8	4690.8
CAND2	45.408	0	0	0
CANX	9099.4	2640.1	2223.4	2891.7
CAP1	5593.5	2272.3	2338.1	2511.7
CAP2	18584	2921.2	1214.8	3603.4
CAPG	403.75	0	0	0
CAPN1	2210.1	794.03	23.735	0
CAPN2	66.128	68.536	127.53	331.03
CAPN5	292.6	171.66	515.13	29.95
CAPNS1	4775.3	2618.4	1905	897.7
CAPRIN1	143.33	0	0	66.779
CAPZA1	1243.3	1208.3	103.55	363.23
CAPZA2	5972.7	8837.7	17569	19262
CAPZB	5498.38	8349.96	15513	16422
CARKD	843.05	249.09	21.017	457.6
CARM1	0	0	0	70.092
CARS2	236.63	0	0	0
CARTPT	102.61	1516.3	0	0
CASC4	0	0	91.908	54.612
CASK	1653.3	2020.3	2295.6	2966.2
CASKIN1	2193.7	1165.8	1094.9	894.94
CAT	227.07	119.47	190.09	377.63
CBR1	12137	1797.4	2182.6	1717.4
CBR3	1014	359.36	640.43	468.32
CBR4	717.88	249.54	496.65	0
CC2D1A	170.14	252.81	28.224	59.298
CCBL2	1557.3	56.986	53.551	979.78
CCDC124	0	211.15	0	0
CCDC127	546.08	1102.2	66.46	0
CCDC136	0	146.03	0	0
CCDC177	561.79	232.28	548.92	477.61
CCDC183	0	0	14.689	460.44
CCDC22	45.051	41.764	0	19.023
CCDC28A	0	0	85.411	0
CCDC47	0	414.37	241.9	420.17
CCDC51	0	0	0	0
CCDC58	11.063	808.96	969.01	1418.2
CCDC6	380.16	153.59	85.612	176.46
CCDC64B	0	0	544.63	42.849
CCDC88A	85.836	70.71	5.5746	36.014
CCDC90B	557.8	115.1	0	0
CCDC91	0	0	0	0
CCDC92	486.71	281.02	0	140.69
CCDC93	0	0	0	0
CCK	0	376.42	39.923	0
CCNJL	0	0	0	6815
CCNY	974.41	1132.4	1168.8	1370.7
CCT2	4521.6	3297.1	3868.8	5538.4
CCT3	5762.5	2206.1	4535.5	5023.1
CCT4	3847.6	1486.8	2646.8	5379.8
CCT5	2503.5	1718.1	1859	2718.7
CCT6A	5841.3	3480.9	4336.1	4029.4
CCT7	5658.6	2289.2	3718.4	5368.6
CCT8	3781.3	1751.7	3591.1	2240.7
CD200	8534.9	0	0	0
CD34	0	0	167.24	0
CD38	706.64	0	0	16.13
CD44	4470.7	91.237	0	0
CD47	23649	10210	7770.7	7686.1
CD59	9707.9	62.512	0	0
CD63	3439.9	0	0	0
CD74	0	0	0	0
CD81	27520	21799	0	0
CD82	1823	0	0	0
CD9	24606	53.918	10.403	114.92
CD99	144.23	0	0	0
CD99L2	1786.7	357.62	0	0
CDADC1	0	0	0	0
CDC37	64.299	564.57	936.27	2042.8
CDC42	4836.85	9154.3	13440.5	21509.4
CDC42BPA	61.213	0	0	0
CDC42BPB	533.56	183.85	17.282	166.57
CDC42EP4	254.12	261.69	0	148.9
CDC42SE2	4296.2	1301.6	0	2499.5
CDH10	14.009	147.11	232.52	269.09
CDH11	343.87	75.817	294.55	104.43
CDH13	547.76	832.65	466.78	865.06
CDH15	0	0	176.76	185.42
CDH18	0	0	0	0
CDH2	2902	2331.3	2946.1	2415.2
CDH20	188.71	176.31	148.02	53.371
CDH4	93.266	107.65	34.356	146.96
CDH6	0	0	0	0
CDH8	0	288.35	0	118.72
CDH9	0	24.66	0	0
CDIPT	2245.8	917.63	2576	2255.7
CDK1	0	0	635	444.11
CDK14	117.16	85.196	206.66	245.21
CDK16	102.54	0	0	0
CDK17	410.35	195.09	0	198.58
CDK18	544.25	459.19	110.11	269.94
CDK5	11918	2363.8	4809.9	3019.3
CDK5R1	0	0	126.21	58.125
CDK5RAP3	51.461	0	0	0
CDKL5	301.4	180.73	264.4	289.23
CDS2	3043.6	121.26	0	121.26
CDV3	0	0	607.15	0
CECR5	0	0	0	0
CECR6	210.63	367.2	109.2	0
CELF1	0	83.464	0	61.239
CELF2	143.86	839.51	183.84	186.24
CELF4	0	61.206	0	0
CELSR2	20.884	18.83	33.33	22.907
CEND1	4280.4	0	0	0
CEP162	22.233	20.834	14.265	8.5504
CEP164	0	0	34.885	33.279
CEP170	266.96	341.67	41.182	68.799
CEP170B	984.79	251.14	91.119	86.796
CEP95	0	0	7445.2	0
CERS6	0	170.53	198.22	0
CFAP53	730.11	878.22	216.09	239.8
CFL1	9354.6	12174	22278	34050
CFL2	481.9	1309.6	2056.8	3618
CHCHD3	6641.7	8206.4	3698.6	4193
CHCHD4	1269.4	705.62	0	0
CHCHD6	2464.8	49.719	0	17.38
CHDH	63.572	146.09	0	0
CHEK1	0	0	446.19	573.16
CHGA	340.3	0	244.14	261.89
CHGB	48.594	37.386	0	0
CHID1	77.07	26.468	41.714	59.276
CHKB	0	0	0	0
CHL1	603.36	162.42	37.435	22.98
CHMP2A	632.84	174.24	163.68	3.2023
CHMP3	1381.1	0	813.65	533.01
CHMP4B	2150.9	924.85	622.47	780.36
CHMP5	0	618.68	475.46	471.64
CHMP6	705.22	1103.6	990.23	144
CHMP7	0	27.516	277.89	569.99
CHN1	169.54	0	0	20.875
CHN2	382.88	82.551	0	0
CHORDC1	0	0	368.11	0
CHP1	867.23	575.24	496.31	515.36
CHRM1	46.677	657.7	1217.8	25.768
CHRM3	0	0	73.638	0
CIAO1	135.03	75.561	34.284	0
CIAPIN1	680.4	53.651	0	0
CISD1	98913	91702	19674	22362
CISD2	2646.2	976.54	882.02	2564.9
CIT	480.51	151.732	71.077	77.7255
CKAP4	71.48	120.12	25.11	0
CKAP5	508.95	199.64	228.59	242.83
CKB	224470	44654	117220	66251
CKMT2	368.37	0	0	0
CLASP1	70.644	42.214	1.4215	0
CLASP2	780.87	412.81	342.65	518.3
CLCN3	544.7	761.38	200.5	514.48
CLCN4	94.911	101.15	148.14	0
CLCN6	139.37	92.223	0	105.86
CLCN7	0	0	0	0
CLDN11	4732.7	36.539	0	43.764
CLDND1	2270.5	0	0	0
CLEC2L	0	241.01	0	0
CLIC4	496.73	70.447	482.84	519.07
CLINT1	125	271.7	378.1	47.614
CLIP1	56.647	0	71.212	109.08
CLIP2	191.49	172.6	81.138	102.64
CLIP3	63.057	14.392	33.613	63.932
CLMN	34.762	67.005	0	0
CLPB	506.98	1005.8	217.5	180.17
CLPP	23.653	153.17	1032.1	1216.4
CLPTM1	491.3	205.92	116.45	235.93
CLSTN1	0	0	0	0
CLSTN3	21.497	10.656	0	0
CLTA	2380	7939.5	22128	20334
CLTB	2091.6	4912.3	9564.6	9775.9
CLTC	7483.9	17629	38314	50628
CLU	7123.6	2644.7	35.656	0
CLVS1	98.855	61.273	111.19	216.66
CLVS2	1759.4	298.04	0	638.52
CMAS	0	0	0	81.118
CMPK1	4355.6	883.88	796.95	2354.7
CMPK2	96.148	0	0	0
CNDP2	1563.2	564.27	1629.1	1859
CNIH2	808.18	0	1022.6	743.7
CNKSR2	1060.84	2219.84	980.24	1601.15
CNN1	85.775	0	0	0
CNN3	2531.3	368.76	338.64	844.65
CNNM1	66.463	10.366	41.862	32.195
CNNM2	167.77	2549.9	0	164.81
CNNM3	10.319	0	0	0
CNOT1	25.918	5.0738	21.516	14.888
CNOT11	0	0	0	0
CNOT3	0	90.441	0	0
CNP	112100	25079	12458	11225
CNPY2	220.05	552.51	133.33	0
CNPY3	0	59.562	0	0
CNR1	145.14	706.68	209.96	121.79
CNRIP1	2614.3	2998.7	3290	2533.5
CNTFR	613.14	901.07	291.43	543.48
CNTN1	34971	17540	13574	14147
CNTN2	1011.8	335.52	257.15	378.97
CNTNAP1	7632.2	4332.4	2723.6	2294.6
CNTNAP2	1434.7	522.98	430.8	387.03
CNTNAP5	187.42	100.99	24.073	28.748
COA3	3803.6	0	1874.2	2824.2
COA6	0	0	0	0
COASY	1117.9	0	0	151.08
COL4A3BP	0	0	0	0
COLEC12	0	0	82.809	123.3
COMMD9	0	0	0	0
COMT	804.5	205.14	0	0
COMTD1	195.08	0	0	0
COPA	141.79	25.536	0	35.683
COPB1	280.01	13.824	0	12.025
COPB2	188.04	0.71696	7.2364	1.1176
COPG1	240.82	0	40.87	79.579
COPS2	783.76	536.96	1309.6	1527
COPS3	29.9	189.64	507.17	680.25
COPS4	547.89	956.46	2023	1771.7
COPS5	113.26	177.02	1873.2	878.87
COPS6	477.38	387.68	784.72	337.78
COPS7A	118.88	146.11	166.3	659.07
COPS8	636.33	810.15	1157.5	1720.9
COPZ1	345.48	369.47	576.03	0
COQ10A	297.79	443.69	244.54	761.52
COQ10B	154.52	0	62.102	0
COQ3	115.16	0	120.67	0
COQ5	0	0	176.43	588.94
COQ6	383.92	212.06	348.45	172.82
COQ7	0	0	0	0
COQ9	420.24	13.845	34.284	150.05
CORO1A	1708.7	3600.7	5895.3	3009
CORO1B	64.262	195.74	1512	1623.2
CORO1C	769.64	875.45	2336.5	2503.4
CORO2A	0	0	0	0
CORO2B	1570.6	1748.7	2222.7	1576.5
COTL1	0	504.11	890.71	1205.1
COX15	440.66	410.03	59.963	722.37
COX17	0	257.05	0	0
COX20	873.88	2737.7	52.969	0
COX4I1	62337	18295	119.41	386.67
COX5A	24630	14691	2861.4	6073.7
COX5B	42296	11940	16906	0
COX6B1	8458	50.735	77.762	0
COX6C	29352	0	0	18093
COX7A2	80645	0	0	0
COX7A2L	14665	951.67	540.37	2640.2
COX7A2P2	0	36815	0	0
COX7C	14683	6777.6	12026	3475.9
CPD	7.9231	114.85	140.03	149.57
CPE	1925.6	2512.3	3712.9	3117.2
CPLX1	117.8	2296.5	4377.8	4163.9
CPLX2	2347.7	16492	44825	55195
CPLX3	0	0	0	0
CPM	155.42	0	87.155	316.73
CPNE1	242.59	0	352.22	439.42
CPNE2	645.23	967.66	312.17	724.08
CPNE3	2555.4	353.57	305.91	113.66
CPNE4	1860.8	4386	3153.8	3520.3
CPNE5	3040.5	1020.6	827.81	702.43
CPNE6	13067	15316	18813	12085
CPNE7	596.91	847.44	894.11	1273.1
CPNE8	448.87	61.313	120.89	100.01
CPOX	0	50.841	0	0
CPSF4	0	0	977.17	0
CPT1A	199.03	299.2	0	0
CPT1C	214.92	232.67	387.88	0
CPT2	316.39	88.865	0	0
CPTP	158.76	0	0	111.9
CRADD	259.53	0	0	0
CRAT	1976	745.7	445.01	1106.9
CRELD1	0	0	0	0
CRIP2	2014.4	2229	120.63	0
CRK	0	102.37	307.22	1034.8
CRKL	488.7	260.93	133.55	220.04
CRMP1	4896.3	5146.8	10163	11933.2
CROCC	45.383	60.616	3.7391	0
CRTAC1	118.27	28.902	5010.3	7472.4
CRTAP	84.962	0	316.92	763.75
CRTC1	560.98	0	0	0
CRYAB	59056	5043.8	1599	1546.6
CRYL1	80.552	0	106.54	384.48
CRYM	1392.6	9607.4	357.15	460.34
CRYZ	4743.3	378.82	223.01	167.57
CRYZL1	0	0	0	0
CS	32346	21907	27428	44233
CSDE1	1199.6	259.45	65.105	191.78
CSE1L	1019.6	21.501	309.75	178.55
CSK	242.66	19.235	0	0
CSMD2	0	8.0166	0	19.442
CSMD3	0	0	0	0
CSNK1A1	353.48	276.81	332.72	263.93
CSNK1D	0	480.73	384.87	488.52
CSNK1E	659.28	1267.2	843.75	1959.7
CSNK2A2	775.59	545.67	780.11	1201.8
CSPG4	0	8.8208	0	10.63
CSPG5	1.755	1276.8	242.46	554.47
CSRP1	14964	12296	6641.4	5787.5
CST3	1164.7	0	0	0
CSTB	0	496.36	0	313.29
CTBP1	506.14	2847.3	8406.5	8541.4
CTBP2	0	61.162	0	0
CTNNA1	317.42	1427.9	914.35	790.09
CTNNA2	8563.4	9641	10100	10321
CTNNB1	12188	11372	8796.7	10772
CTNND1	965.89	390.21	580.61	624.1
CTNND2	1253.3	1124.3	961.5	994.23
CTPS1	145.19	381.52	3.1218	152.45
CTPS2	0	103.91	0	0
CTSD	4034.1	2260.1	1001.4	609.51
CTTN	196.99	98.616	1316.7	971.35
CTTNBP2	75.927	16.356	204.17	171.69
CUEDC1	722.14	785.68	1224.4	888.55
CUL1	21.997	0	169.49	215.01
CUL2	0	92.841	33.827	128.04
CUL3	0	70.068	353.06	472.15
CUL5	28.554	229.69	312.13	430.97
CXADR	893.75	238.54	12.829	118.43
CYB5A	1228	2974.5	2648.7	2917.6
CYB5B	8069.4	866.04	0	0
CYB5R1	3317.2	5310.6	1142	1161.8
CYB5R3	14448	7250.2	1447.6	620.87
CYC1	20305	26371	10157	8462.4
CYCS	31518	15172	32208	41523
CYFIP1	72.111	55.375	358.5	658.507
CYFIP2	3800.8	4894.3	7915.2	7206
CYLD	672.15	575.44	89.744	442.7
CYP27A1	0	0	0	0
CYP2D6	0	0	146.03	0
CYP3A5	0	0	33.53	1433.3
CYP46A1	437.79	25.971	307.79	404.44
CYP51A1	0	0	0	0
CYTH1	0	58.142	0	0
CYTH2	628.74	565.93	453.75	1016.4
CYTH3	0	0	0	45.913
D2HGDH	180.85	345.15	0	505.04
DAAM1	973.93	1159.6	997.88	1055.6
DAAM2	507.86	92.843	223.82	28.799
DAB2IP	21.713	102.49	0	0
DACT3	2.1546	137.35	0	0
DAD1	0	1608.9	59.839	0
DAG1	54.76	149.05	0	0
DAGLA	184.4	294.73	926.62	182.66
DAGLB	42.286	35.466	0	0
DAP3	328.27	630.41	0	0
DARS	1069	325.51	758.37	100.99
DARS2	193.05	0	0	0
DAZAP1	0	0	0	0
DBN1	1110.8	2188.6	2710.7	2003.7
DBNL	1369.6	1185.6	795.91	1036.1
DBT	1830.3	276.14	129.86	109.68
DCAF7	136.74	599.39	293.41	182.67
DCAKD	70.375	0	0	300.76
DCC	0	510.64	69.885	69.575
DCD	321.53	1278.9	1156.6	512.24
DCLK1	8911.2	2899.2	3168.6	18017
DCLK2	2828.9	752.65	1054.8	891.61
DCTN2	2349.6	1983.8	2081.4	3458.4
DCTN3	416.12	389.23	1096.8	1105
DCTN4	0	0	317.54	103.77
DCXR	1956.2	0	0	0
DDAH1	2907.2	6356.5	3706.2	1629.8
DDAH2	54.656	54.724	42.235	1092.6
DDB1	83.285	94.278	256.22	367.25
DDHD1	0	0	46.13	56.772
DDHD2	106.56	0	33.215	64.575
DDOST	145.71	286.95	102.93	228.12
DDRGK1	426.66	0	0	0
DDX1	669.78	513.2	302.23	341.61
DDX17	0	0	0	35.123
DDX5	0	0	0	0
DDX6	1136.2	871.37	294.06	276.91
DECR1	7885.4	1355.2	539.8	51.366
DENND4B	0	0	0	0
DENR	192.88	594.72	1164.4	615.47
DERL1	782.88	0	0	0
DGKB	1832.6	1144.9	619.5	866.78
DGKE	0	0	0	0
DGKG	430.69	1052.1	308.56	320.79
DGKH	73.346	10.507	0	4.178
DGKI	197.5	117.8	208.44	268.45
DGKQ	200.08	0	0	0
DGKZ	810.34	56.999	105.74	42.658
DHDH	0	228.02	0	0
DHODH	272.58	775.62	334.47	327.68
DHRS1	87.144	1092.4	1617.6	470.15
DHRS7	1120.8	36.248	0	0
DHRS7B	150.37	16.588	42.311	0
DHX30	0	0	0	0
DHX9	0	158.69	30.471	0
DIABLO	2535	0	0	0
DIAPH1	85.572	14.188	0	50.544
DIP2A	0	0	10.638	0
DIP2B	335.8	75.414	136.94	276.72
DIP2C	304.05	75.406	545.65	478.56
DIRAS1	409.11	0	0	3.8525
DIRAS2	4842.8	2986.4	5423.2	5850.1
DKK3	1200.7	389.54	24.268	277.71
DLAT	13278	3781.3	9169.6	16258
DLD	11914	7457.1	7140.8	7433.2
DLG1	158.85	445.39	782.86	646.06
DLG2	2687.2	5680.3	8023.7	8058.2
DLG3	556.68	2669.9	4477.2	2872
DLG4	14538	15495	16185	16988
DLGAP1	2071.95	2470.9	2286.1	1068.9
DLGAP2	246.12	418.82	373.36	612.79
DLGAP3	1479.5	2331.2	1740.7	1625.5
DLGAP4	374.03	807.08	1110.1	651.12
DLST	11086	5829.9	6124.3	7828.5
DMD	20.438	89.804	4.0286	38.261
DMTN	2331.6	565.7	282.82	463.91
DMWD	354.21	207.6	0	44.634
DMXL1	33.803	9.3069	10.453	37.443
DMXL2	1855.1	711.68	1830.8	2000.8
DNA2	26.269	410.26	345.66	271.32
DNAJA1	2782.1	1395.6	1173.6	1222.7
DNAJA2	1998.3	1657.3	876.63	2339.2
DNAJA3	1644.8	1185.3	113.24	353.61
DNAJA4	294.95	43.239	0	292.47
DNAJB1	1554.7	291.13	238.02	91.258
DNAJB11	207.59	165.27	328.42	66.282
DNAJB2	1406.4	477.94	80.271	53.299
DNAJB4	2876.3	1045.4	548.06	916.32
DNAJB5	601.82	111.85	327.16	0
DNAJB6	0	0	0	0
DNAJC11	1718.7	1318.8	728.49	1400.4
DNAJC13	142.59	12.995	42.11	16.681
DNAJC19	1619	2414.3	668.78	93.8
DNAJC5	22169	21463	20836	30281
DNAJC6	2857.5	1085.8	2318.4	1571.5
DNM1	68185.8	23556.1	54289.5	60811.3
DNM1L	2984.3	2071	4349.8	7732.3
DNM2	7043.6	1795.3	1578.9	3418.8
DNM3	4257.1	1440.2	1560.5	799.1
DNPEP	0	0	173.19	334.26
DOC2A	276.52	353.21	144.39	0
DOCK10	0	9.2189	339.32	477.23
DOCK3	434.65	284.96	241.96	296.85
DOCK4	245.86	415.92	916.59	1610.7
DOCK7	43.416	10.017	0	6.2531
DOCK9	144.65	165.55	184.55	197.93
DPM1	340.81	63.496	101.24	0
DPP10	2679.8	608.07	249.26	425.75
DPP3	0	92.95	18.547	45.544
DPP6	11477	7030	6246.8	4168.6
DPYSL2	40430	63318	98447	114890
DPYSL3	612.79	759.79	6753.9	6196.5
DPYSL4	1034.8	195.19	1480.4	1986.9
DPYSL5	793.65	546.44	1301.6	2354
DRG2	610.62	0	447.42	151.17
DSCR3	177.73	0	0	0
DSP	0	51.337	32.404	15.119
DST	294.38	127.68	67.017	74.424
DSTN	8098.3	3195.2	4638	4022.3
DTD1	0	0	489.37	2240.2
DTNA	520.6	896.16	371.47	602.33
DTNB	0	0	0	0
DTX3	117.78	54.986	204.6	130.28
DUSP3	400.6	953.01	1649.5	3104.5
DUT	95.257	0	0	0
DYNC1H1	9622.1	2921.8	2879.8	3691
DYNC1I1	2864.1	806.69	362.29	412.45
DYNC1I2	534.28	315.44	215.48	152.32
DYNC1LI1	2706	899.73	1508.6	1473.2
DYNC1LI2	6406	346.3	0	813.33
DYNLL1	17937	18245	14330	19695
DYNLL2	32601	59012	80021	74905
DYRK1A	54.825	28.089	328.61	206.26
EARS2	79.381	0	0	0
EBAG9	0	272.39	0	0
ECH1	1257.8	340.2	32.548	6.3329
ECHDC1	0	478.91	0	0
ECHS1	4491	740.73	638.98	1134
ECI2	234.5	39.621	0	1252.3
EDC4	81.587	27.574	0	0
EDF1	576.34	864.04	184.15	0
EDIL3	94.915	0	0	0
EEA1	0	47.165	330.73	56.236
EEF1A2	2692.2	442.96	790.14	727.61
EEF1B2	468.05	130.56	0	225.42
EEF1D	954.43	63.496	546.29	45.657
EEF1G	1669.8	872.61	1396.8	1900.7
EEF2	1580.9	1193	3172.4	3549
EEFSEC	123.99	0	26.208	58.73
EFHD2	613.79	813.6	3022.5	3263.3
EFNB1	0	52.419	66.705	0
EFNB3	0	238.23	166.53	0
EFR3A	618.31	353.77	321.67	427.34
EFR3B	1266.1	1540.9	1292	875.54
EFTUD1	9.7911	0	0	0
EGFR	298.18	248.8	180.77	75.73
EGLN1	196.68	0	0	0
EHBP1	115.99	76.178	42.389	43.855
EHD1	2361.8	976.3	1500.9	2600.5
EHD3	13002	6981.6	3138.1	6231.6
EHD4	0	65.631	239.59	0
EIF2A	67.873	0	0	0
EIF2AK2	418.46	4.4328	0	0
EIF2AK3	0	0	0	0
EIF2B2	2074.7	107.91	0	0
EIF2B3	241.85	0	0	0
EIF2B4	79.555	0	0	0
EIF2B5	98.387	0	0	0
EIF2S1	0	98.102	144.49	198.57
EIF3A	88.008	33.696	12.229	8.9794
EIF3B	28.09	61.979	26.178	29.789
EIF3E	0	0	0	55.613
EIF3I	245.3	282.69	0	0
EIF3J	0	333.24	302.82	384.17
EIF3L	0	0	42.954	0
EIF4A1	569.6	18.93	140.11	218.38
EIF4A2	5112.8	1184.2	1617.9	2916
EIF4A3	0	64.424	0	0
EIF4B	0	0	830.05	922.65
EIF4E	473.34	91.693	698.39	635.02
EIF4G1	0	20.298	0	33.728
EIF4G2	161.41	74.794	94.132	79.685
EIF4G3	29.247	15.207	3.9852	26.743
EIF4H	2312	857.29	1591.9	2076.5
EIF5	522.29	39.832	126.46	470.24
EIF5A	2248.7	1105.6	1779.3	1008.7
ELAVL1	0	148.29	0	0
ELFN2	543.2	1807.7	1485.7	1119.4
ELMO1	0	45.031	79.454	30.707
ELMO2	1113.3	1051.9	821.96	932.65
ELMOD1	780.04	1871	853.99	726.41
EMC1	343.49	128.56	74.152	48.977
EMC2	213.39	312.94	131.7	252.12
EMC3	110.1	48.784	0	0
EMC6	958.89	0	159.67	0
EMC7	935.26	829.67	523.09	689.86
EMC8	0	0	510.61	654.82
EMD	730.76	40.38	148.21	57.668
EML1	0	19.432	1907.5	2597.5
EML2	36.207	0	0	231.01
ENAH	129.6	705.07	147.58	51.233
ENDOD1	2176.4	122.84	7.2707	0
ENO1	10128	42970	58761	43067
ENO2	4002.5	11995	30809	31125
ENO3	0	301.96	1440.3	10535
ENOPH1	257.91	0	946.41	93.985
ENPP4	123.43	0	0	0
ENPP6	4619.2	151.33	48.771	3.0859
ENSA	0	0	756.28	584.49
ENTPD1	84.847	0	0	0
ENTPD2	504.32	127.51	55.293	0
ENTPD3	117.67	0	0	0
EPB41	93.639	13.454	7.8556	13.523
EPB41L1	9281.36	4243.2	4020.5	5207.9
EPB41L2	1259.8	1258.85	12321	615.03
EPB41L3	16957.4	3541.09	4710.69	3811
EPB41L5	91.501	0	0	42.411
EPDR1	1200.6	713.5	0	0
EPHA4	1921.6	1827.1	2273.5	2099.5
EPHA5	75.351	135.55	39.407	32.355
EPHA6	0	90.52	84.42	117.35
EPHA7	81.113	168.99	132.1	165.39
EPHB2	38.363	225.81	311.88	33.744
EPHB3	59.751	51.06	0	0
EPHB6	0	0	0	0
EPHX1	4441.6	394.44	282.17	217.1
EPM2AIP1	61.316	0	0	0
EPN1	745.74	1173.9	1596	3801.1
EPN2	0	164.63	458.24	452.89
EPRS	90.357	4.2272	0	17.263
EPS15L1	1102.2	387.33	558.33	800.69
EPS8	0	17.217	0	16.291
EPT1	1341.8	0	0	0
ERBB2IP	36.176	44.973	0	0
ERBB4	0	0	16.555	17.144
ERC1	124.37	3213	73.776	342.27
ERC2	2074.9	5000.9	6275.73	4931.18
ERGIC1	564.84	468.86	1152.1	869.03
ERH	0	477.55	0	0
ERLEC1	119.06	124.4	21.915	0
ERLIN1	71.685	0	0	0
ERLIN2	1765.5	839.54	827.18	688.2
ERMN	613.03	158.4	0	200.15
ERMP1	250.36	436.14	198.29	0
ERO1A	457.98	370.36	0	288.56
ERP29	3124.6	2356	335.63	2177.5
ERP44	318.67	559.69	627.61	1253.8
ESD	220.24	330.61	798.74	731.42
ESYT1	943.6	269.35	19.231	78.093
ESYT2	1004.9	22.572	88.357	36.769
ETF1	70.346	176.39	328.4	394.7
ETFA	1057.4	569.56	904.37	413.29
ETFB	5083.9	1778.6	528.52	1246.5
ETFDH	1833.9	3737.9	935.55	1263.9
ETHE1	153.02	0	0	0
EVA1A	0	0	0	925.76
EVI5L	78.074	151.53	13.631	53.54
EVL	43.852	75.784	0	0
EWSR1	57.24	112.43	0	0
EXD2	130.84	222.55	0	0
EXOC1	820.58	124.06	317.23	396
EXOC2	746.46	287.21	213.35	529.3
EXOC3	1398.1	760.21	917.94	506.14
EXOC4	382.51	132.86	49.192	444.94
EXOC5	569.2	11.059	280.89	385.99
EXOC6B	227.56	7.6317	85.868	261.4
EXOC7	518.88	292.516	287.837	758.58
EXOC8	519.36	0	0	130.59
EXOG	1237.5	71.161	245.96	141.52
EZR	982.39	826.07	1472	1305.4
F8A1	0	0	0	0
FAAH	353.38	0	723.01	772.75
FABP3	266.43	3955.6	2638.4	446.23
FABP5	106.85	281.81	1447.7	1546.7
FABP7	412.15	7407.8	0	2285
FADS1	0	81.059	0	0
FAF2	1629.2	679.58	496.11	695.45
FAH	47.176	54.01	110.05	452.21
FAHD1	167.33	0	56.319	1286
FAIM2	1294.6	2644.5	95.076	0
FAM114A2	0	0	0	221.5
FAM120A	79.016	129.51	185.75	144.13
FAM126B	1516.4	623.67	1088.5	942.46
FAM131B	269.29	114.04	134.55	299.58
FAM134A	346.29	230.73	0	0
FAM13C	0	0	0	0
FAM162A	17899	0	1892.8	1562.5
FAM171A1	613.5	166.14	64.132	166.09
FAM171A2	302.89	192.12	30.945	300.23
FAM171B	685.19	408.54	60.764	83.038
FAM177A1	1144.7	646.12	243.16	282.59
FAM20B	0	0	39.236	0
FAM210A	359.61	308.31	417.55	117.16
FAM210B	183.25	0	0	0
FAM213A	7408.9	4136	2046.1	3675.6
FAM213B	0	6.0899	290.17	0
FAM219A	0	215.99	0	140.73
FAM3C	0	0	0	0
FAM49A	2220.2	1038.3	3441.1	4644.9
FAM49B	70.927	534.63	2540.2	2432.6
FAM63B	120.87	0	0	0
FAM65A	0	0	0	0
FAM73B	0	0	0	0
FAM81A	1598.4	1505.7	408.07	373.54
FAM91A1	76.929	28.65	0	0
FAM96B	322.09	268.35	0	0
FAM98A	91.307	0	0	0
FAM98B	108.93	76.746	0	73.821
FARP1	1057.9	670	528.82	538.97
FARSA	382.99	296.66	106.08	0
FARSB	1872.2	1030	279.15	182.6
FASN	713.43	146.52	155.97	159.84
FAU	1541.8	2145.6	0	1334
FBXL16	192.25	102.58	647.82	757.89
FBXL20	69.023	20.641	488.25	52.891
FBXO2	4286.3	1757.5	0	0
FBXO21	0	0	20.884	0
FBXO3	0	0	0	107.26
FBXO41	476.63	966.92	979.52	425.85
FBXO7	0	0	0	0
FCHSD2	14.466	0	0	0
FDPS	262.45	0	331.4	0
FDXR	0	59.384	0	0
FECH	600.8	468.55	432.41	41.177
FERMT2	51.746	98.45	226.83	325.1
FEZ1	0	0	0	0
FGA	329.42	0	0	0
FGB	307.3	74.052	228.24	0
FGD4	233.51	132.66	26.049	0
FGFR2	85.773	134.24	0	79.52
FGFR3	0	29.372	0	0
FGG	373.52	53.639	0	0
FH	6617.2	2537.9	9771.7	10620
FHL1	822.21	1585.7	755.05	609.52
FIBCD1	82.852	146.66	171.26	246.21
FIBP	572.33	328.82	208.66	303.96
FIS1	1606.3	18.15	1255	4215.7
FKBP15	55.218	23.309	28.744	26.493
FKBP1A	2751.3	18013	38155	21708
FKBP1B	0	2803.7	4037.4	0
FKBP2	3693.7	327.89	2714.6	1324.5
FKBP3	661.12	1711.8	593.62	301.45
FKBP4	20.878	33.453	29.532	0
FKBP8	1191.7	1379.9	896.4	912.05
FLG2	0	0	0	0
FLII	157.22	41.386	0	0
FLNA	30.621	29.327	6.931	0
FLNC	16.799	2.448	0	0
FLOT1	12275	6525	4397.7	2864.3
FLOT2	12400	5480.4	6355.9	3957.4
FLRT2	0	315.69	176.34	0
FLRT3	39.782	108.57	0	0
FMN2	206.71	63.402	0	0
FMNL1	31.666	0	189.68	238.93
FMNL2	909.28	753.84	464.29	350.4
FN3K	331.85	182.58	159.69	947.64
FN3KRP	0	0	389.79	338.22
FNBP1	0	11.04	0	49.181
FOLH1	95.314	362.02	0	0
FRMD5	66.321	0	55.055	40.029
FRRS1L	1412.3	1044.5	1265.5	1179.2
FRS3	0	0	0	0
FRY	9.4775	45.585	16.811	0
FSCN1	1580.7	1858.3	1644.8	3527.9
FSD1	626.99	235.31	178.54	358.18
FSD1L	571.66	57.874	60.101	107.29
FTH1	2303.2	1771.7	1360.6	1432.3
FUBP1	40.37	74.653	0	0
FUK	0	778.43	38.332	22.459
FUNDC1	1696.5	715.24	159.04	518.62
FUNDC2	2335.6	2643.6	344.25	203.05
FUS	0	339.01	266.46	403.02
FXR1	0	0	0	0
FXR2	83.637	216.64	187.12	70.478
FXYD1	0	429.12	214.41	0
FXYD6	22332	14955	3163.3	4889.4
FYN	3709.9	2016.1	2442.3	2780.3
G3BP2	432.37	123.1	109.8	0
G6PD	111.22	136.46	174.54	142.21
GABARAPL2	3295.2	3460.2	1464.8	2247.5
GABBR1	1195.2	1285.3	1258.2	1302.5
GABBR2	1486	1288.9	1334.4	914.49
GABRA1	1020.7	533.04	2143.7	782.68
GABRA2	419.38	1127.7	336.23	953.37
GABRA3	482.78	305.15	263.73	51.911
GABRA4	103.93	58.361	170.96	57.417
GABRA5	529.64	450.64	668.84	393.01
GABRB1	2699.7	2586.8	3217.3	3071.9
GABRB2	3996.9	2966	2381.5	1521.8
GABRB3	1296.6	1775.4	3748.9	2428.6
GABRD	0	65.864	124.66	0
GABRG2	2062.4	1501.6	2142.4	1346.5
GAD1	98.4	28.716	524.15	150.35
GAD2	782.69	642.83	970.54	3236.3
GADD45GIP1	0	0	0	0
GAK	190.38	28.937	181.96	155.33
GALK1	276.38	0	0	0
GANAB	1920.8	379.67	243.38	497.14
GAP43	29632	11842	267.83	126.72
GAPDH	298130	208500	35070	53837
GAPVD1	373.25	71.197	58.462	371.5
GARS	56.954	0	334.52	451.65
GART	174.06	0	39.514	58.881
GAS7	938.21	988.05	1152	1161
GBA	43.278	0	0	0
GBA2	76.329	0	224.24	36.746
GBAS	6091.5	3083.3	2445.6	6172.2
GBE1	161.79	0	0	70.108
GCA	1108.1	0	77.363	0
GCDH	0	0	0	0
GCLC	85.506	47.237	105.4	175.61
GCLM	767.69	0	0	0
GCN1	33.613	1.8731	0	2.6128
GCSH	577.13	1011.2	641.9	784.66
GDA	160.43	1594.7	2203.4	4402.6
GDAP1	25092	23027	12914	42949
GDAP1L1	3116.6	2586.3	2435.6	2686.2
GDE1	117.77	101.98	386.78	0
GDI1	4161.1	13355	16623	34974
GDI2	828.6	1978.6	1835.2	2378.3
GDPD1	1220.2	715.6	0	258.01
GDPD5	74.886	0	0	47.073
GET4	877.84	0	0	0
GFAP	68647	18776	4793.7	11052
GFM1	37.382	0	21.929	24.47
GFRA2	127.08	295.07	194.47	0
GGA3	108.07	0	155.78	186.43
GGPS1	0	0	214.6	72.086
GGT7	1369.2	902.6	540.6	612.85
GHITM	722.28	2384.6	77.656	881.09
GID8	103.89	0	0	103.27
GIPC1	572.27	144.44	121.17	283.62
GIT1	3441.1	1384.3	1475.1	1485.5
GJA1	19833	5941.2	3575.2	8268.8
GJB6	1825.6	0	0	0
GK2	309.25	677.3	210.57	273.58
GLG1	44.158	290.58	363.82	327.04
GLIPR2	2497.2	0	0	96.274
GLO1	1078.1	2859.6	3033	8035.9
GLOD4	162.95	620.89	1439.7	1356.1
GLRX3	592.24	99.617	114.25	388.34
GLRX5	1087.7	718.54	308.95	0
GLS	15819	3134.8	8164.5	12412
GLTP	706.53	221.31	1478.3	1628.7
GLUL	1216.2	12758	27775	11909
GMDS	0	36.288	67.934	0
GMFB	0	1728.1	3253.8	3871.8
GMPPB	0	41.322	350.38	209.2
GMPR	0	0	283.56	0
GMPS	0	0	35.453	0
GNA11	3310.1	1660.9	1099.1	562.36
GNA12	341.92	380.29	52.375	106.07
GNA13	4740.1	3108	1213.1	1251.5
GNAI1	14964	16859	16931	15996
GNAI2	86854	67968	57429	45693
GNAI3	780.96	1435.9	620.71	43.913
GNAL	0	0	0	0
GNAO1	213721	172889	120140	166010
GNAQ	8726.8	9531.1	12109	7039.1
GNAS	4368.9	3421.8	2623.6	2424.6
GNAZ	13124	11081	6769.4	6388.5
GNB1	152170	159800	139380	141150
GNB2	56117	39755	63675	53649
GNB2L1	969.85	2939.2	2038.1	1707.7
GNB4	2127.1	1587.4	93.145	193.82
GNB5	4338	5923.4	4254.4	2614.2
GNG12	17238	16193	11689	4573.3
GNG13	0	0	2210.9	1204.9
GNG2	90394	83718	58620	95258
GNG3	31300	31799	13130	12614
GNG4	2961.8	2891.6	4545.5	5962.3
GNG5	1154.5	0	0	0
GNG7	27534	21761	9597.2	10028
GNL1	1660.3	120.78	99.583	206.12
GNPDA1	294.18	273.99	666.27	55.262
GNPDA2	0	0	203.71	384.29
GNS	0	0	0	0
GOLGA3	0	29.476	0	0
GOLGA5	0	0	0	0
GOLGA7	0	697.93	0	543.63
GOLGA7B	535.03	448.3	744.9	622.82
GOLGB1	0	11.175	0	0
GOPC	874.94	38.032	0	0
GORASP2	132.47	0	0	0
GOSR2	77.351	210.21	483.73	463.45
GOT1	1562.2	3579.5	17917	13300
GOT2	43197	25634	30267	51009
GPC1	925.61	708.31	1146.4	773.43
GPC4	364.1	763.71	757.7	1011.5
GPC5	0	0	619.45	539.01
GPC6	0	0	0	0
GPD1	0	1141.2	248.71	1558.5
GPD1L	713.96	338.01	3060.1	1987.2
GPD2	12779	23772	10282	2273.9
GPHN	514.45	2269.4	1235.7	2620.6
GPI	42398	8869.1	5666.7	7985
GPM6A	96900	90297	69911	72093
GPM6B	32006.6	28877.1	39734	29701
GPR158	512.26	251.4	474.44	666.1
GPR37L1	1780.3	4226.5	2937.8	2451.1
GPRC5B	3657.1	1488.3	261.76	1465.8
GPRIN1	438.41	535.56	216.04	280.83
GPS1	261.89	433.23	360.51	475.33
GPSM1	187.44	12.393	0	46.846
GPX1	2518.1	3566.7	472.84	873.49
GPX4	7357.2	2452.8	519.7	782.37
GRAMD1B	0	36.522	14.547	0
GRAMD4	0	0	0	0
GRB2	0	1240.4	1447.2	2576.6
GRHPR	658.85	0	119.79	78.489
GRIA1	3205.77	7126.78	11233.7	7799.19
GRIA2	11852.6	19000.2	23919.9	18090.8
GRIA3	1088.58	1252.59	1485.4	468.254
GRIA4	126.16	66.013	96.428	95.593
GRID1	280.07	1000.6	147.62	508.92
GRIK2	3.222	383.21	175.86	157.82
GRIK3	0	51.72	19.869	0
GRIK5	0	0	29.026	0
GRIN1	1656	3707.6	5669.4	3682.7
GRIN2A	783.76	938.59	1518.9	1786.3
GRIN2B	1348.8	3359.1	2792.5	1867.6
GRIP1	202.23	104.29	0	195.66
GRIPAP1	1240.5	581.9	63.381	662.37
GRK5	147.45	31.244	0	0
GRM1	486.53	271.5	577.75	523.57
GRM2	631.05	347.08	1207.7	122.97
GRM3	1271.9	1279.4	1402.6	1923.7
GRM4	25.717	0	21.73	0
GRM5	889.25	977.61	1199.6	1116.6
GRM7	141.86	401.06	721.79	479.36
GRPEL1	784.64	223.77	139.38	630.08
GRSF1	52.082	0	0	0
GSG1L	0	0	0	0
GSK3A	1085.9	924.6	580.46	958.58
GSK3B	1431.8	1809.1	4637.2	2562
GSN	2756.8	102.72	191.55	343.44
GSPT1	95.647	132.43	295.62	1.4217
GSPT2	0	0	0	0
GSR	132.2	262.82	313.9	297.03
GSS	0	489.15	0	0
GSTA3	0	0	0	7573.4
GSTA4	2.5429	0	618.29	554.77
GSTK1	1586.1	152.87	0	0
GSTM1	238.79	150.89	0	7676.3
GSTM3	5256.7	142.22	3026.5	5597.5
GSTM5	789.08	933.43	4124.5	4944.1
GSTO1	393.54	1447.6	0	19.36
GSTP1	2043.8	59.422	1783.2	0
GTF2I	0	11.222	10.172	0
GTPBP1	43.275	0	20.831	0
GUCY1A2	7.1148	67.462	170.25	0
GUCY1A3	0	0	0	125.19
GUCY1B3	146.79	88.43	405.55	98.928
GUF1	61.728	0	0	0
GUK1	4239.8	0	0	343.02
GYG1	0	856.82	0	381.17
GYPC	447.36	0	0	0
HABP4	0	0	0	111.73
HACD3	5829.4	3775.8	1995.4	214.5
HADH	4155.9	98.877	0	335.47
HADHA	6294.7	7964.5	944.33	1109.9
HADHB	8527.7	12223	1258.2	1247.6
HAGH	1620.9	571.82	443.06	898
HAPLN1	5447.3	4316.4	5125.1	5982.3
HAPLN2	26349	3444.8	476.11	1083
HAPLN4	1680.4	4032.1	2045.3	2193.8
HARS	43.146	61.841	221.33	208.12
HARS2	164.91	24.319	0	0
HAX1	202.09	239.15	0	0
HBB	98244	86357	10135	40156
HBD	3529.2	180.51	0	0
HBS1L	159.05	0	327.45	0
HCCS	1094.5	300.87	283.86	368.06
HCN1	232.94	192	444.11	315.13
HCN2	348.82	202.06	219.42	67.008
HCN4	47.276	0	16.831	0
HDAC11	574.28	412.38	533.13	0
HDHD2	116.17	304.48	1523.4	828.78
HDHD3	83.688	0	0	0
HDLBP	42.015	158.29	39.185	99.946
HEATR5B	40.672	0	24.753	0
HEBP1	530.59	981.47	1017.5	2142.2
HECTD1	8.1677	0	0	0
HECTD3	0	0	0	0
HECTD4	27.283	0	54.545	12.428
HECW2	44.879	0	0	49.348
HEPACAM	13364	3570.3	401.87	2242.6
HERC1	14.832	0	8.3303	0
HERC4	0	0	0	0
HEXA	0	0	123.09	99.382
HEXB	0	0	348.46	141.84
HGS	177.17	81.002	140.32	500.93
HIBADH	457.74	237.34	470.83	3739.1
HIBCH	348.6	187.43	367.1	512.91
HINT1	2336.6	5360.7	4417.9	7968.6
HINT2	875.16	316.66	0	0
HINT3	307.32	1051.8	0	0
HIP1	0	0	0	0
HIP1R	461.58	0	76.116	210.9
HIST1H4A	380.52	9804.4	5917.1	12701
HK1	56003	58242	30429	52983
HKDC1	0	0	0	0
HLA-A	197.88	73.462	19.848	2.1288
HLA-F	0	0	296.87	489.5
HM13	0	219.56	0	227.48
HMGB1	0	243.32	0	180.64
HMGB2	0	130.43	0	0
HMOX2	4514.7	471.5	1150.1	1015.5
HNRNPA0	278.2	1476	547.21	0
HNRNPA2B1	4032	3593.5	567.17	3369
HNRNPA3	825.66	651.42	292.57	1513.28
HNRNPD	0	0	0	0
HNRNPDL	70.607	141.13	112.86	0
HNRNPF	41.983	2.0299	2.6735	24.506
HNRNPH1	1705.9	311.57	371.46	857.01
HNRNPH2	145.65	91.097	0	0
HNRNPH3	775.7	406.39	417.63	0
HNRNPK	961.61	797.57	167.51	649.05
HNRNPM	0	36.328	12.968	83.188
HNRNPR	0	79.987	0	190.1
HNRNPU	0	301.82	40.732	0
HOMER1	2736.5	6755	5976.2	4732.8
HOMER2	37.732	599.34	608.18	103.41
HOMER3	19.641	713.22	0	143.31
HOOK1	40.873	0	0	11.677
HOOK3	0	0	32.935	0
HP	469.33	0	0	0
HPCA	11600	19742	46821	46085
HPCAL1	2752.3	1240.5	1386.9	3095.6
HPCAL4	1574.5	2357.9	5335.8	1695.3
HPRT1	1933.7	5862.3	4277.5	6864.2
HRAS	4344.1	5456.5	12335	7608.4
HRSP12	2438	9469.7	0	1373.6
HS1BP3	185.87	0	0	0
HS2ST1	0	0	0	0
HSBP1	2303.9	0	0	9.2677
HSD17B10	1616.1	1651.6	1620.9	4903.5
HSD17B12	2098.6	631.59	0	105.54
HSD17B4	2187.5	221.98	189.47	261.26
HSD17B6	0	696.74	0	0
HSD17B8	1503.2	241.6	1854.6	0
HSDL1	1463.8	2640	47.175	4.4682
HSDL2	693.8	235.15	37.576	59.003
HSP90AA1	23426	15241	15033	21095
HSP90AB1	12478	5130.3	10305	13025
HSP90AB2P	967.17	27.509	437.2	0
HSP90B1	3927.5	5247.8	2940.5	3119.7
HSP90B2P	0	219.69	93.105	279.66
HSPA12A	36568	7011.7	7327.2	7755.7
HSPA12B	362.67	1171.5	997.03	1332.1
HSPA13	165.25	35.087	0	378.94
HSPA1L	2.0321	0	69.602	102.33
HSPA2	650.92	312.01	921.04	717.5
HSPA4	377.17	1259	4191	4940.1
HSPA4L	819.25	377.41	944.61	1275.9
HSPA5	7838.3	10151	8210.4	9286.1
HSPA8	39788.3	62727	90973	122109
HSPA9	16643	6229.9	10221	16592
HSPB1	15819	287.1	51.331	0
HSPB11	9487.2	1239.1	3833.7	322.66
HSPB6	351.06	59.919	415.02	0
HSPD1	37071	15252	16273	46963
HSPE1	13904	7121.3	13726	19309
HSPH1	1024.5	1144.3	1226.8	2506.7
HTR1A	1478.1	412.05	183.59	0
HTRA1	0	0	20.411	0
HTRA2	0	231.05	473.02	694.54
HTT	150.75	22.651	39.398	68.225
HUWE1	88.176	54.817	2.6776	161.86
HYOU1	2100	909.42	750.22	557.81
IARS	91.766	16.546	0	0
IARS2	2426.1	553.65	460.9	862.09
IBA57	332.9	62.948	39.89	0
ICA1	431.25	144.02	980.41	637.01
ICA1L	381.5	30.189	369.8	900.89
ICAM1	234.49	0	0	0
ICAM5	5202.5	2442.3	1021.4	856.02
IDE	23.179	23.532	114.81	1894.1
IDH1	0	1421.4	1437.7	5483.1
IDH2	26999	14962	2118.9	2801.4
IDH3A	12655	7466.7	38842	50896
IDH3B	7605.2	4961.8	12138	29068
IDH3G	2811.2	938.51	6187.8	6678.4
IFIT3	0	0	0	0
IFT27	852.29	0	0	0
IGBP1	903.01	104.16	0	0
IGFBP4	0	0	0	0
IGHG1	26480	235.39	206.77	93.925
IGHG2	234.21	0	0	0
IGHG3	1463.5	0	47.711	0
IGHM	187.83	0	0	0
IGKC	20623	27.15	0	0
IGKV1D-33	477.69	0	0	69.592
IGLON5	75.407	0	0	0
IGSF21	1464.7	701.43	464.8	42.929
IGSF8	20568	9799.3	724.4	152.18
IGSF9B	90.444	23.085	114.66	0
IKBKG	71.314	65.213	0	100.76
IL1RAPL1	54.783	27.269	0	0
ILDR2	79.859	54.169	314.89	214.87
ILF2	227.97	570.13	0	0
ILF3	2.3448	129.28	0	18.465
ILK	595.95	85.572	77.561	139.65
ILVBL	380.51	0	0	0
IMMT	12623.8	9798.8	3906.1	4085.8
IMPA1	0	1046.3	2242.3	2020.3
IMPDH2	391.37	0	19.684	92.15
INA	14662	27086	8528.1	13840
INF2	71.001	0	41.823	49.987
INPP1	0	287.95	0	367.85
INPP4A	110.18	82.405	282.65	130.84
INPP5A	527.95	228.91	231.75	53.236
INPP5F	84.079	0	0	0
INPP5J	0	0	142.5	163.79
INPP5K	0	35.86	0	0
INPPL1	0	0	0	0
IPO5	1223.4	401.66	888.37	467.54
IPO7	205.65	140.61	202.22	470.72
IPO9	83.459	53.533	61.09	52.469
IQGAP2	18.767	18.73	18.894	30.621
IQSEC1	3136.9	2767.5	1155.7	2096.5
IQSEC2	1787.9	3254.5	2976.3	1931.2
IQSEC3	88.297	174.77	101.35	216.25
IRS2	267.23	0	0	0
ISCU	0	0	0	0
ISLR2	16.606	0	93.802	129
ISOC2	882.43	131.69	0	81.897
IST1	2201.5	1303.9	547.15	3124.2
ITCH	79.102	0	0	28.189
ITFG1	704.33	300.26	0	0
ITGA6	27.019	0	0	0
ITGAV	610.19	118.89	432.39	540.19
ITGB1	407.51	138.48	0	149
ITGB2	269.62	0	0	0
ITGB8	700.7	15.577	239.56	296.03
ITM2B	1093.4	1283.1	856.45	1184.5
ITM2C	257.01	450.29	2405.8	0
ITPA	0	138.2	657.27	309.63
ITPKA	2525.8	332.48	2406.6	1218.2
ITPKB	17.748	0	0	0
ITPR1	303.18	369.48	269.31	295.7
ITPR2	7.4901	4.8232	70.101	17.909
ITSN1	518.45	409.67	139	358.19
ITSN2	53.335	10.74	0	0
IVD	891.61	196.77	531.93	0
JAK1	48.951	2.6766	6.8123	19.965
JAKMIP2	0	0	0	0
JAM2	1419.3	95.013	0	95.612
JAM3	118.56	0	0	0
JPH3	0	0	0	0
JUP	33.452	62.797	169.61	130.44
KALRN	224.037	354.359	304.01	391.785
KARS	251.1	42.074	0	0
KATNAL1	0	0	724.14	107.64
KATNAL2	299.71	728.85	1337.4	1372.5
KATNB1	90.27	22.338	0	0
KAZN	145.68	0	0	0
KBTBD11	2570.3	871.56	433.96	0
KBTBD3	0	0	0	0
KCMF1	0	0	0	0
KCNA1	1146.2	1502.3	2723.5	2156
KCNA2	1226	178.9	1693.6	1592.9
KCNA3	89.748	66.092	0	0
KCNA4	147.31	0	312.38	345.45
KCNA6	0	0	0	0
KCNAB1	346.17	0	323.86	268.25
KCNAB2	3264.7	3269.4	5346.7	5152.7
KCNB1	0	0	0	0
KCNC1	142.15	52.007	163.58	196.24
KCND2	0	349.85	450.2	169.41
KCND3	137.61	685.33	1122.3	45.48
KCNIP2	101.28	673.35	1145.6	152.47
KCNIP4	309.32	326.16	732.71	680.75
KCNJ10	181.3	683.12	0	0
KCNJ3	371.94	284.24	1296	436.92
KCNJ4	118.8	192.45	0	0
KCNJ6	0	280.67	228.97	0
KCNK1	0	0	0	0
KCNMA1	4342.7	1699.8	1935.8	2327
KCNQ2	408.65	399.86	833.63	792.78
KCNQ3	0	0	0	0
KCNT1	0	0	0	0
KCTD12	3015.4	6869.2	6904.7	12574
KCTD16	2867.6	2935.1	1345.2	1439.4
KCTD21	0	0	0	0
KCTD4	0	0	0	0
KDSR	798.27	259.85	189.91	0
KHSRP	1.2553	103.08	0	0
KIAA0196	40.131	0	0	15.247
KIAA0319L	0	77.457	72.883	0
KIAA0513	3116.5	1342	2496.9	2951.3
KIAA0907	5.1615	0	0	3972.4
KIAA1107	12.15	0	0	6.5033
KIAA1109	47.827	28.343	0	17.063
KIAA1191	0	92.938	0	0
KIAA1211	0	4.5379	264.35	346.39
KIAA1211L	199.62	338.19	219.23	129.44
KIAA1217	573.34	369.86	292.05	754.3
KIAA1468	604.59	168.4	432.7	116.94
KIAA1549	238.62	269.81	213.07	71.024
KIAA1549L	370.56	290.48	51.389	94.73
KIAA1671	39.933	12.255	0	97.332
KIDINS220	32.798	8.7458	23.164	32.043
KIF13B	447.4	0	433.71	94.891
KIF1A	604.76	77.549	468.68	706.03
KIF1BP	62.312	0	0	0
KIF20B	222.25	96.211	125.35	130.25
KIF21A	2813.7	466.83	440.95	521.73
KIF2A	2987.3	1241.5	1927.9	2894.5
KIF3A	265.16	167.01	45.976	20.381
KIF3B	1507.9	72.648	80.689	85.806
KIF5A	25.057	0	13.815	0
KIF5B	81.116	65.386	181.91	154.15
KIF5C	2822.9	787.88	2235.3	1693.9
KIFAP3	203.86	13.521	0	64.638
KIT	547.54	302.95	125.91	249.77
KLC1	1714.4	1022.2	1821	1517
KLC2	318.82	57.75	268.4	144.2
KLC4	0	0	0	0
KLHL22	88.314	37.526	0	0
KPNA3	689.98	272.22	0	543.81
KPNA4	0	0	0	143.71
KPNA6	1105.8	408.77	323.32	392.72
KPNB1	2555.8	747.78	1370.2	2261.8
KRAS	6386.1	11615	15274	11129
KRT1	13135	10507	14143	15123
KRT10	6569.2	7247.1	10271	7414.9
KRT2	2192.2	4792.4	3619.3	3430
KRT5	244.37	145.21	130.7	96.437
KRT6B	0	0	0	0
KRT9	3486.8	3695.8	4699.8	3236.4
KSR1	152.21	237.95	66.308	262.9
KSR2	82.979	26.134	0	0
KTN1	94.125	165.89	20.228	50.411
L1CAM	5703.4	2765.1	785.05	888.18
L2HGDH	0	0	0	0
LACTB	566.92	276.76	796.14	246.12
LAMP2	1164.1	0	0	0
LAMP5	160.13	256.02	0	461.08
LAMTOR1	2926.4	2622.7	2237.9	2239.6
LAMTOR2	606.92	0	0	0
LAMTOR3	644.22	1226.3	0	0
LAMTOR5	0	0	0	0
LANCL1	6425.5	6710.6	455.31	2575.7
LANCL2	2184	1779.8	1506.1	1575.9
LAP3	0	174.14	1220.5	443.47
LARP1	374.2	62.405	60.726	121.38
LARP6	150.49	0	0	0
LARS	375.12	72.887	49.528	0
LARS2	260.23	22.778	0	0
LASP1	57.128	1200.3	1852.1	1941.3
LCP1	0	46.35	0	56.353
LDHA	3062	8432.7	3764.8	19690
LDHB	9522.4	15594	28135	55995
LDHC	0	1775.5	0	0
LETM1	5586	8330.2	3619.6	4369.5
LETMD1	956.53	179.67	0	22.166
LGALS1	0	0	0	0
LGALS3	1523.2	0	0	0
LGALSL	783.74	934.28	5526.2	519.56
LGI1	4127.6	2250.6	7444.2	6185.6
LGI2	0	12.982	0	19.712
LGI3	116.94	98.528	55.383	67.901
LGI4	0	0	0	0
LIMCH1	247.66	65.036	0	0.86405
LIN7A	1017.1	2289.4	2733.7	1234.2
LIN7B	0	0	447.89	432.33
LIN7C	2479.3	4519.7	3319.8	2826.2
LINGO1	1667.7	1757.4	2077.7	2033.7
LLGL1	2099.4	552.55	223.97	411.31
LMAN1	215.41	57.843	0	0
LMAN2L	0	672.35	442.7	442.6
LMBRD2	159.9	0	0	0
LMNA	68.108	351.97	91.831	823.91
LMNB1	23.528	153.71	18.576	155.72
LMNB2	2.4871	440.65	0	11.674
LMO7	29.398	219.2	25.941	48.628
LMTK2	39.051	12.336	0	0
LMTK3	81.091	52.95	39.756	86.427
LNP	773.39	250.83	304.39	22.802
LNPEP	25.057	117.66	0	0
LONP1	3368.1	311.57	170.44	1352.2
LPCAT1	75.251	0	0	0
LPCAT3	47.226	0	0	376.5
LPCAT4	501.54	0	0	0
LPL	0	0	0	0
LPP	0	0	0	0
LRFN1	51.924	50.912	64.01	34.059
LRFN3	0	0	0	0
LRFN5	0	184.12	28.669	0
LRIG1	87.599	59.409	0	0
LRP1	423.8	693.09	492.49	405.36
LRP1B	5.7849	14.229	6.865	0
LRPAP1	85.428	58.488	0	0
LRPPRC	3226.6	26.88	252.49	95.183
LRRC14	69.549	0	0	0
LRRC16B	7.9524	0	0	0
LRRC40	191.5	58.614	0	84.289
LRRC47	1996.5	335.32	549.73	745.09
LRRC4B	464.99	1441.6	870.69	1240
LRRC4C	0	230.11	288.03	216.05
LRRC57	3295.5	2527	2062	776.43
LRRC59	1153.6	1660.1	1276.8	1070.9
LRRC7	738.16	1714.4	2482.9	2113.8
LRRC73	252.83	982.51	2141.1	1947.4
LRRC8A	963.92	617.73	572.94	1067.5
LRRC8B	129.39	67.155	140.77	69.796
LRRC8D	41.947	0	113.23	167.17
LRRFIP1	0	0	0	0
LRRTM1	249.62	707	1873.2	575.66
LRRTM2	384.33	212.04	155.97	136.15
LRRTM3	0	0	0	37.374
LRRTM4	61.695	22.032	1.5959	18.536
LRSAM1	373.24	0	0	48.82
LSAMP	17871	14746	16534	12651
LSM14A	31.36	0	0	0
LST1	0	0	0	0
LTA4H	20.233	98.627	156.88	0
LUZP1	18.147	34.076	6.4089	0
LY6H	19465	16037	18782	12838
LYNX1	9517.5	0	0	0
LYPLA2	745.75	610.31	1933	1301.4
LYRM4	1419	82.477	481.58	0
LYSMD1	0	0	0	0
LZTS1	0	0	0	0
LZTS3	0	41.63	28.172	27.676
M6PR	858.63	429.67	435.15	320.03
MACF1	294.26	439.21	269.649	356.049
MACROD1	298.91	0	46.189	0
MACROD2	49.662	0	94.593	148.03
MAD1L1	0	1.3603	250.94	169.31
MADD	1124.6	156.63	415.05	432.43
MAEA	0	0	166.02	291.48
MAG	1419	1893.3	791.48	1342.3
MAGI1	4.5335	0	37.151	0
MAGI2	212.23	133.23	252.9	121.62
MAGI3	0	0	32.698	0
MAL2	78903	50611	76832	0
MAN2C1	0	0	0	0
MANEAL	22.296	0	107.09	0
MANF	138.93	487	211.66	186.77
MAOA	4433.2	2269.5	237.03	1045.2
MAOB	21710	14755	1620.4	3413.1
MAP1A	2594.1	1422.4	1128.9	1460.6
MAP1B	9897.2	5533.5	3127.7	3395
MAP1LC3A	21459	18987	14245	20612
MAP1S	463.11	265.66	0	52.911
MAP2	11939	8986.3	1456.2	3757.8
MAP2K1	6086.4	1939.1	3657.8	5762.4
MAP2K2	7253.3	1453	1849.9	2573.4
MAP2K4	2652.5	392.02	1009.2	1139.6
MAP2K5	173.25	0	0	0
MAP2K6	569.21	156.6	0	59.747
MAP2K7	60.126	0	14.391	0
MAP3K5	70.107	94.28	0	0
MAP4	1314.65	584.63	407.66	97.333
MAP4K2	82.549	0	0	22.871
MAP4K3	0	38.959	52.5	23.262
MAP4K4	40.4	70.786	0	0
MAP6	1444.9	1307.2	2226	1478.4
MAP6D1	3415.3	584.93	111.89	161.8
MAP7	0	67.206	33.13	0
MAP7D1	129.4	188.52	67.409	105.43
MAP7D2	90.833	61.59	0	0
MAPK1	3439.2	6791	9331	12896
MAPK10	2895.2	1052.2	1208	698.09
MAPK15	1096.6	345.02	2912.5	2099.9
MAPK1IP1L	0	767.05	0	0
MAPK3	1410.9	536.03	1411.4	1148.2
MAPK8	0	0	94.826	144.61
MAPK8IP3	420.39	70.064	86.693	265.54
MAPRE1	0	512.68	528.99	521.24
MAPRE2	9498.2	2502.1	1862	2972
MAPRE3	3766.9	2198.3	4757.67	4911.7
MAPT	16737.5	14478.1	17920	21905.7
MARC2	2698.3	4523.3	700.4	453.44
MARCH5	452.73	309.07	812.04	758.45
MARCKS	2951.5	3694.8	114.8	1728.7
MARCKSL1	0	571.92	421.21	906.81
MARK1	439.56	118.79	5.6026	15.436
MARK2	1879.7	1098.3	941.26	728.32
MARK3	56.397	30.557	17.059	119.6
MARK4	123.92	13.605	30.505	98.152
MARS	2029.44	2085.5	3496.8	3321.7
MAST1	52.841	15.033	0	0
MAST3	118.14	45.906	13.644	0
MAT2A	11.041	349.58	302.76	0
MAT2B	315.11	0	0	69.117
MATR3	0	228.22	25.341	44.531
MBLAC2	3598.7	2316.3	1164.7	2356.9
MBOAT7	1856.4	641.13	120.15	0
MBP	499678	40590.3	42771.2	112600
MCAM	170.05	119.21	0	0
MCAT	187.34	0	0	0
MCCC1	484.95	600.15	95.396	73.84
MCCC2	226.38	882.07	101.03	132.67
MCF2L	52.035	47.466	0	18.225
MCTS1	114.37	275.16	324.24	1113.6
MCU	2696.3	5052	6204.2	4981.2
MCUR1	507.55	1174	0	91.532
MDGA1	0	20.27	0	0
MDGA2	68.987	16.79	0	45.873
MDH1	6404.8	10784	35995	42197
MDH2	113290	54330	111250	177640
ME1	0	45.877	1139.2	144.27
ME2	844.42	605.51	1140.1	2602.5
ME3	2458.5	1892.7	1124.5	5695.9
MECR	1619.2	0	0	3.0918
MESDC1	0	0	0	0
MESDC2	196.34	320.66	165.8	0
METTL7A	5270.8	0	369.95	576.99
MEX3B	0	0	0	448.18
MFF	1492.2	1870.9	2074	2058.5
MFN2	2400.2	2010.1	1560.1	1621.3
MFSD10	45.031	0	0	0
MFSD4	1210.6	0	0	464.02
MFSD6	1076.34	601.98	495.05	119.27
MGEA5	110.03	243.32	147.57	20.461
MGLL	0	143.07	0	0
MGRN1	332.48	279.59	108.69	58.57
MGST1	6365.9	0	0	0
MGST2	0	0	0	0
MGST3	10079	0	0	0
MIA3	0	26.197	0	0
MICAL3	90.262	19.094	40.353	60.067
MICU1	131.83	519.09	960.41	601.07
MICU3	3.3118	830.83	663.95	245.96
MIEN1	556.33	0	0	0
MIF	7170.4	6220.9	4894.8	9693.1
MINK1	1540.4	1337.8	907.93	1237.9
MKKS	5361.7	0	0	1032.2
MKL2	349.6	299.11	0	71.214
MKRN2	0	0	0	0
MLC1	8102.7	28.223	0	0
MLEC	582.56	1197	0	62.096
MLF2	1258	493.6	581.99	944.5
MLIP	0	0	0	0
MLLT4	115.42	362.02	103.05	56.685
MLST8	1132.8	202.78	0	0
MLYCD	363.25	0	0	216.06
MMAB	290.14	0	0	0
MMD2	0	0	1089.9	1253.5
MMGT1	0	0	0	0
MMP17	0	0	813.44	483.34
MMP24-AS1	0	0	0	0
MMS19	508.95	24.344	0	0
MOB2	2550.1	804.16	0	703.09
MOG	10822	1235.2	1786	1280.1
MOGS	18.605	0	0	0
MON2	43.228	0	0	0
MOXD1	0	103.14	0	0
MPC2	5966.3	4479.5	809.81	1529.8
MPDZ	48.345	14.408	0	21.17
MPP1	91.453	65.025	133.24	0
MPP2	2797.4	2586.1	3534.6	2923.4
MPP3	39.405	34.897	182.15	226.5
MPP5	94.593	40.002	0	36.559
MPP6	1581.3	988.06	2208.7	622.28
MPP7	118.05	141.43	0	21.863
MPRIP	371.434	173.056	36.7616	23.4105
MPST	0	81.221	0	312.85
MRAS	2852.7	1971.1	2047.4	2326.4
MROH1	146.2	0	0	23.914
MRPL13	0	0	0	0
MRPL14	78.14	142.39	0	0
MRPL15	0	0	0	0
MRPL16	0	0	0	0
MRPL22	226.07	0	0	0
MRPL24	250.3	89.809	55.175	0
MRPL37	26.258	58.127	0	0
MRPL38	103	0	210.68	0
MRPL4	146.91	0	55.491	0
MRPL41	0	0	0	0
MRPL44	95.336	0	110.64	303.35
MRPL46	154.53	0	0	0
MRPL48	0	0	0	270.65
MRPS16	564.28	0	652.89	820.45
MRPS2	0	0	0	0
MRPS22	91.504	0	0	0
MRPS26	77.481	0	0	11.527
MRPS27	0	0	0	0
MRPS36	3124.6	3135.7	175.01	0
MRPS7	448.59	0	0	0
MRRF	155.15	174.93	0	0
MSI2	0	0	0	0
MSMO1	1339.8	582.62	0	0
MSN	0	40.855	34.78	40.17
MSRA	459.16	0	0	0
MSRB2	0	0	0	0
MT-ATP6	63856	0	0	0
MT-ATP8	34662	1103.4	0	16.555
MT-CO1	0	0	0	0
MT-CO2	77611	68.659	65.665	423.23
MT-CYB	764.12	0	2773.2	1516.1
MT-ND1	7177	0	418.98	999.78
MT-ND3	8514.8	0	0	0
MT-ND4	221.67	0	0	0
MT-ND5	3570.5	0	0	194.52
MT-ND6	1453	0	0	0
MTAP	0	0	748.74	1084.5
MTCH1	4747.4	4345.8	3982.3	5052.9
MTCH2	15480	13199	12399	12619
MTDH	0	114.83	40.903	0
MTFP1	0	799.91	1578.5	0
MTFR1L	970.34	2322.5	2570	2358.5
MTHFD1	4981.4	810.12	266.46	309.65
MTHFD1L	33.857	93.216	195.08	340.11
MTIF2	16.824	0	0	0
MTMR1	810.61	392.89	592.97	920.15
MTMR2	264.47	111.6	293.24	336.72
MTMR6	132.11	19.357	8.4218	15.682
MTMR7	48.979	0	0	0
MTMR9	285.36	36.629	61.137	77.644
MTOR	368.65	909.67	31.819	63.879
MTPN	1410.1	2827.5	6588.6	9775.5
MTSS1L	57.901	116.08	0	0
MTUS2	0	0	0	0
MTX1	2371.4	1234.7	934.42	853.25
MTX2	4651.6	4420.2	2941.8	993.24
MTX3	799.87	1014.5	431.38	357.62
MUT	516.08	172.07	189.47	219.01
MVB12B	202.21	0	203.45	0
MVK	0	0	0	0
MX1	0	18.024	0	0
MXRA7	0	0	0	0
MYADM	11331	3255.9	1802.3	832.32
MYCBP2	6.8038	0	0	10.33
MYDGF	1821.1	322.17	143.7	269.33
MYF6	0	0	1761.4	3040.9
MYH10	6272.3	4960	2559.2	3223.6
MYH14	523.62	188.53	19.483	108.16
MYH9	1806.3	472.76	396.76	243.37
MYL6	10641	4847.1	7087.8	7168
MYL6B	56.507	28.295	0	0
MYLK	613.58	206.62	53.147	0
MYO18A	652.43	387.96	465.31	800.96
MYO1D	68.759	19.078	1327.3	1602.5
MYO5A	5955.5	3011.1	4594.2	3981
MYO6	217.05	183.37	321.12	331.79
MYRIP	36.833	0	0	0
NA	127440	101240	80790	115480
NAA30	0	0	0	0
NACA	8.4617	16.736	25.052	0
NADK2	796.01	297.26	111.59	146.46
NAGK	376.73	148.36	234.93	256.59
NAMPT	2392.3	52.784	433.65	153.05
NANS	222.63	92.884	162.2	625.32
NAP1L1	5666.1	4763.1	3736.7	2190.7
NAP1L4	1992	757.63	870.47	1084
NAP1L5	1600.7	1604.9	522.1	0
NAPA	6157.8	4680.1	3116.2	10080
NAPB	15735	10178	19959	26691
NAPEPLD	102.39	0	37.868	34.048
NAPG	10565	6316.6	10750	13873
NARS	77.64	373.75	699.05	473.97
NAT6	61.388	0	0	0
NAT8L	0	0	0	0
NAV1	53.172	123.95	15.319	65.417
NBAS	0	8.7936	0	0
NBEA	251.15	161.68	79.222	118.96
NCALD	664.14	1616.8	5773.5	3017.3
NCAM1	55748.4	27549	6435.52	7783.7
NCAM2	5677.1	4362.1	918.87	495.92
NCAN	7522.8	4139.2	2247.8	5102.6
NCDN	1806.5	3622.2	7669	8519.9
[truncated: 1,631 more rows]
