# Supplementary material for: Comparative Hippocampal Synaptic Proteomes of Rodents and Primates: Differences in Neuroplasticity-Related Proteins
Source: Front Mol Neurosci. 2018 Oct 2;11:364. doi: 10.3389/fnmol.2018.00364 (PMC6176546; doi:10.3389/fnmol.2018.00364)
Supplement: TABLE S4 — SWATH data tables for the mouse vs. rat comparison in Supplementary Figure S7. [file Table_4.XLS]

## Sheet: sTable4_proteins_Mouse vs Rat
protGroups.input	ACC.input	ID	fasta	gene	gene.label	gene.entrez.id	pepcount	roll-up gene norm.spectr norm.prot.loess Mouse 1	roll-up gene norm.spectr norm.prot.loess Mouse 2	roll-up gene norm.spectr norm.prot.loess Mouse 3	roll-up gene norm.spectr norm.prot.loess Mouse 4	roll-up gene norm.spectr norm.prot.loess Mouse 5	roll-up gene norm.spectr norm.prot.loess Rat 1	roll-up gene norm.spectr norm.prot.loess Rat 2	roll-up gene norm.spectr norm.prot.loess Rat 3	roll-up gene norm.spectr norm.prot.loess Rat 4	roll-up gene norm.spectr norm.prot.loess Rat 5	median Q-value Mouse 1	median Q-value Mouse 2	median Q-value Mouse 3	median Q-value Mouse 4	median Q-value Mouse 5	median Q-value Rat 1	median Q-value Rat 2	median Q-value Rat 3	median Q-value Rat 4	median Q-value Rat 5	#values Mouse	#values Rat	mean Mouse	mean Rat	sd Mouse	sd Rat	CoV Mouse	CoV Rat	mean(log10 data) Mouse	mean(log10 data) Rat	sd(log10 data) Mouse	sd(log10 data) Rat	Mouse vs Rat | log2 foldchange	Mouse vs Rat | effect-size; (mu1-mu2)/mean(sd1,sd2)	Mouse vs Rat | moderated effect-size (eBayes@limma)	Mouse vs Rat | FDR adjusted p-values	Mouse vs Rat | significant	Mouse vs Rat | simple test; mean(group2) > mean(group1)	functional_group.Proteasome	functional_group.SV_general	functional_group.Endocytosis	functional_group.ECM
tr|B4DLN1|B4DLN1_HUMAN	B4DLN1	tr|B4DLN1|B4DLN1_HUMAN	>tr|B4DLN1|B4DLN1_HUMAN Uncharacterized protein OS=Homo sapiens PE=2 SV=1		tr|B4DLN1|B4DLN1_HUMAN	NA	1	262.188	236.876	266.189	244.319	207.317	240.043	196.772	197.77	151.81	165.943	0.00114019	6.44274e-05	1.32613e-05	0.00213768	1.44754e-06	3.2771e-06	2.32894e-05	1.31102e-06	2.61099e-07	1.28254e-08	5	5	243.378	190.468	23.546	34.0829	0.100196	0.178639	2.38458	2.27433	0.0434061	0.0769735	-0.366238	-1.33236	-3.05855	0.0242168	0	0	0	0	0	0
tr|H3BN98|H3BN98_HUMAN	H3BN98	tr|H3BN98|H3BN98_HUMAN	>tr|H3BN98|H3BN98_HUMAN Uncharacterized protein (Fragment) OS=Homo sapiens PE=4 SV=2		tr|H3BN98|H3BN98_HUMAN	NA	1	89.9017	104.72	68.9585	68.3906	78.3775	84.769	93.1552	87.7064	86.9929	77.386	0.00449505	0.000652417	0.000359986	0.0124338	0.000196582	9.30371e-06	6.94574e-07	1.90252e-06	7.6154e-06	3.60999e-06	5	5	82.0696	86.0019	15.3869	5.71863	0.183491	0.0675973	1.90831	1.93372	0.0790302	0.0293237	0.0844093	0.43984	0.734765	0.564277	0	1	0	0	0	0
tr|M0QYT0|M0QYT0_HUMAN	M0QYT0	tr|M0QYT0|M0QYT0_HUMAN	>tr|M0QYT0|M0QYT0_HUMAN Uncharacterized protein (Fragment) OS=Homo sapiens PE=1 SV=1		tr|M0QYT0|M0QYT0_HUMAN	NA	1	89.3551	42.3462	77.4482	121.141	135.238	146.126	182.767	134.755	174.852	180.169	5.8565e-05	0.380245	0.00281844	2.22071e-06	1.14331e-05	4.20359e-06	0.000430727	3.60286e-06	4.47451e-06	2.89346e-06	5	5	93.1056	163.734	36.7316	21.8277	0.482313	0.138651	1.93627	2.2109	0.198614	0.059929	0.912326	1.37182	3.41224	0.0147336	0	1	0	0	0	0
sp|Q2M2I8|AAK1_HUMAN	Q2M2I8	sp|Q2M2I8|AAK1_HUMAN	>sp|Q2M2I8|AAK1_HUMAN AP2-associated protein kinase 1 OS=Homo sapiens GN=AAK1 PE=1 SV=3	AAK1	AAK1	22848	11	3561.08	3753.94	3946.29	3791.41	3683.43	3577.06	3695.44	3402.41	3751.03	3703.22	7.85991e-08	1.57315e-07	2.69432e-09	3.65468e-08	2.17946e-08	7.93941e-07	1.64773e-08	5.97804e-07	8.04149e-08	7.41754e-07	5	5	3747.23	3625.83	141.726	140.363	0.0377929	0.0393429	3.57346	3.55914	0.0164074	0.0170798	-0.0475708	-0.818283	-0.936396	0.453474	0	0	0	0	1	0
sp|P49588|SYAC_HUMAN	P49588	sp|P49588|SYAC_HUMAN	>sp|P49588|SYAC_HUMAN Alanine--tRNA ligase, cytoplasmic OS=Homo sapiens GN=AARS PE=1 SV=2	AARS	AARS	16	3	594.009	532.101	577.634	563.993	562.821	635.56	567.423	523.034	588.41	582.157	1.76819e-05	3.17524e-07	1.17509e-08	1.5781e-06	2.09925e-07	9.46741e-08	1.55091e-08	2.50201e-08	1.29591e-07	2.58933e-07	5	5	566.112	579.316	22.8205	40.507	0.0406513	0.0702797	2.75262	2.76206	0.0176474	0.0304845	0.031378	0.393496	0.516999	0.691708	0	1	0	0	0	0
sp|P80404|GABT_HUMAN	P80404	sp|P80404|GABT_HUMAN	>sp|P80404|GABT_HUMAN 4-aminobutyrate aminotransferase, mitochondrial OS=Homo sapiens GN=ABAT PE=1 SV=3	ABAT	ABAT	18	8	4865.39	3848.23	4471.45	4089.22	3706.73	6143.77	5683.97	5946.95	5405.96	6191.02	5.23373e-08	6.54129e-08	1.50561e-08	5.25246e-08	7.71371e-08	1.20189e-07	7.556e-09	4.92901e-08	8.52808e-09	1.3364e-08	5	5	4196.21	5874.34	473.204	329.305	0.111418	0.0568351	3.62069	3.7684	0.0482392	0.0246633	0.490687	1.72115	6.11812	0.000469044	1	1	0	0	0	0
sp|O75027-3|ABCB7_HUMAN	O75027-3	sp|O75027-3|ABCB7_HUMAN	>sp|O75027-3|ABCB7_HUMAN Isoform of O75027, Isoform 3 of ATP-binding cassette sub-family B member 7, mitochondrial OS=Homo sapiens GN=ABCB7	ABCB7	ABCB7	22	1	86.8689	94.8926	68.1591	80.6743	90.8148	75.2306	65.7487	52.4776	62.9443	71.0518	2.00617e-06	2.36576e-07	2.46846e-07	1.49553e-06	3.06819e-08	5.96013e-05	1.06236e-05	6.44149e-06	6.67818e-05	2.46916e-05	5	5	84.2819	65.4906	10.4273	8.68452	0.130288	0.138729	1.9229	1.81296	0.0563456	0.0599622	-0.365229	-1.37789	-3.24686	0.018728	0	0	0	0	0	0
sp|Q9NUT2-5|ABCB8_HUMAN	Q9NUT2-5	sp|Q9NUT2-5|ABCB8_HUMAN	>sp|Q9NUT2-5|ABCB8_HUMAN Isoform of Q9NUT2, Isoform 5 of ATP-binding cassette sub-family B member 8, mitochondrial OS=Homo sapiens GN=ABCB8	ABCB8	ABCB8	11194	2	424.142	334.94	316.879	337.098	440.457	523.167	553.462	567.173	570.075	507.854	8.11747e-06	0.000778796	0.000372682	0.000447935	3.00284e-05	4.26036e-07	5.35084e-07	1.45462e-06	5.33664e-07	1.6491e-07	5	5	370.703	544.346	57.0673	27.5969	0.152002	0.0512212	2.56501	2.73542	0.065637	0.0222305	0.566111	1.68724	5.8201	0.000645211	1	1	0	0	0	0
sp|Q9UBJ2|ABCD2_HUMAN	Q9UBJ2	sp|Q9UBJ2|ABCD2_HUMAN	>sp|Q9UBJ2|ABCD2_HUMAN ATP-binding cassette sub-family D member 2 OS=Homo sapiens GN=ABCD2 PE=1 SV=1	ABCD2	ABCD2	225	1	44.8031	273.641	21.8734	28.2445	20.7535	105.115	78.2797	76.8027	103.409	95.5971	0.196362	0.279228	0.315729	0.148029	0.00830635	2.29215e-05	6.99251e-06	0.000214211	2.37562e-07	3.66952e-06	5	5	77.863	91.8406	109.864	13.5479	1.46634	0.151696	1.63929	1.95914	0.465212	0.0655064	1.06253	0.899253	1.77162	0.157449	0	1	0	0	0	0
sp|P28288|ABCD3_HUMAN	P28288	sp|P28288|ABCD3_HUMAN	>sp|P28288|ABCD3_HUMAN ATP-binding cassette sub-family D member 3 OS=Homo sapiens GN=ABCD3 PE=1 SV=1	ABCD3	ABCD3	5825	1	156.829	150.99	162.544	161.489	168.676	190.166	211.134	177.404	250.788	214.718	5.0364e-08	1.68068e-07	5.94785e-09	4.87616e-09	4.18699e-09	1.28302e-09	2.12944e-09	3.19118e-08	1.68761e-09	1.92163e-10	5	5	160.106	208.842	6.61703	28.002	0.0415003	0.132424	2.20411	2.31677	0.0180156	0.0572614	0.374239	1.57336	4.31669	0.00408357	1	1	0	0	0	0
sp|P61221|ABCE1_HUMAN	P61221	sp|P61221|ABCE1_HUMAN	>sp|P61221|ABCE1_HUMAN ATP-binding cassette sub-family E member 1 OS=Homo sapiens GN=ABCE1 PE=1 SV=1	ABCE1	ABCE1	6059	1	47.028	57.6587	39.6756	51.0441	43.382	45.6609	37.3584	43.2092	49.0302	36.0804	5.392e-07	1.71484e-06	7.98618e-07	8.24789e-05	1.14952e-05	0.000164679	0.000904358	0.00386675	0.000111778	0.00215457	5	5	47.7577	42.2678	6.96116	5.48898	0.145167	0.13146	1.6754	1.62305	0.062717	0.056848	-0.173906	-0.83341	-1.50831	0.225412	0	0	0	0	0	0
sp|Q9UG63|ABCF2_HUMAN	Q9UG63	sp|Q9UG63|ABCF2_HUMAN	>sp|Q9UG63|ABCF2_HUMAN ATP-binding cassette sub-family F member 2 OS=Homo sapiens GN=ABCF2 PE=1 SV=2	ABCF2	ABCF2	10061	1	68.7796	86.9244	81.9235	66.8	85.1355	100.115	100.535	83.6557	76.0607	95.4175	0.00159267	7.36175e-06	7.65687e-06	0.00557095	0.00027029	3.29809e-06	2.51195e-05	0.00176125	6.47263e-05	7.13162e-06	5	5	77.9126	91.1568	9.43892	10.8457	0.124374	0.123389	1.88898	1.95722	0.0538079	0.0533851	0.22669	1.10023	2.16234	0.0902166	0	1	0	0	0	0
sp|Q9UNQ0-2|ABCG2_HUMAN	Q9UNQ0-2	sp|Q9UNQ0-2|ABCG2_HUMAN	>sp|Q9UNQ0-2|ABCG2_HUMAN Isoform of Q9UNQ0, Isoform 2 of ATP-binding cassette sub-family G member 2 OS=Homo sapiens GN=ABCG2	ABCG2	ABCG2	9429	1	114.085	158.196	124.212	140.62	121.829	34.8593	63.4187	85.3708	51.9437	39.3976	3.04958e-06	2.34279e-05	1.25563e-08	3.94981e-07	2.41709e-05	0.00812223	1.10766e-05	0.000383523	2.60759e-05	0.00845278	5	5	131.788	54.998	17.6446	20.3205	0.130758	0.373401	2.11688	1.71737	0.056547	0.156904	-1.32713	-1.6778	-6.13515	0.000463752	-1	0	0	0	0	0
sp|Q8N2K0|ABD12_HUMAN	Q8N2K0	sp|Q8N2K0|ABD12_HUMAN	>sp|Q8N2K0|ABD12_HUMAN Monoacylglycerol lipase ABHD12 OS=Homo sapiens GN=ABHD12 PE=1 SV=2	ABHD12	ABHD12	26090	2	248.239	332.687	299.202	288.755	257.562	129.065	158.041	177.261	165.662	152.325	2.58567e-08	1.61815e-06	9.19904e-07	9.7349e-06	1.9538e-06	7.32279e-08	5.67843e-09	2.50131e-07	1.10101e-07	1.56092e-07	5	5	285.289	156.471	33.8882	17.9405	0.118401	0.119341	2.45286	2.19204	0.0512419	0.0516459	-0.866422	-1.78926	-8.55501	4.95834e-05	-1	0	0	0	0	0
sp|O95870-2|ABHGA_HUMAN	O95870-2	sp|O95870-2|ABHGA_HUMAN	>sp|O95870-2|ABHGA_HUMAN Isoform of O95870, Isoform 2 of Protein ABHD16A OS=Homo sapiens GN=ABHD16A	ABHD16A	ABHD16A	7920	4	493.651	390.838	444.49	401.66	460.985	442.8	467.982	459.627	446.55	486.068	3.24429e-06	1.36204e-05	4.20493e-06	0.000234145	1.82128e-06	1.13868e-07	4.33989e-07	4.64337e-06	1.40368e-06	2.37234e-07	5	5	438.325	460.605	42.4611	17.4521	0.0971484	0.0376467	2.64016	2.66308	0.042092	0.016344	0.0761285	0.706545	1.07897	0.386497	0	1	0	0	0	0
sp|Q8IZP0-10|ABI1_HUMAN	Q8IZP0-10	sp|Q8IZP0-10|ABI1_HUMAN	>sp|Q8IZP0-10|ABI1_HUMAN Isoform of Q8IZP0, Isoform 10 of Abl interactor 1 OS=Homo sapiens GN=ABI1	ABI1	ABI1	10006	6	1366.36	1638.64	1597.52	1479	1446.61	1296.15	1249.19	1359.6	1395.56	1264.17	1.93832e-07	6.94562e-08	4.00834e-08	9.68465e-08	6.3247e-07	9.16093e-08	8.69238e-08	9.98891e-09	3.03003e-08	7.65615e-08	5	5	1505.63	1312.93	111.494	62.7059	0.074247	0.0475027	3.17676	3.11785	0.0322007	0.0206185	-0.195706	-1.46648	-3.07806	0.0236108	0	0	0	0	0	0
sp|Q9NYB9-2|ABI2_HUMAN	Q9NYB9-2	sp|Q9NYB9-2|ABI2_HUMAN	>sp|Q9NYB9-2|ABI2_HUMAN Isoform of Q9NYB9, Isoform 2 of Abl interactor 2 OS=Homo sapiens GN=ABI2	ABI2	ABI2	10152	3	805.517	767.969	905.87	760.93	857.453	1074.75	1139.74	980.122	1002.7	974.357	1.85076e-08	7.70011e-08	3.16455e-10	1.12805e-08	7.69282e-09	3.13401e-09	1.45236e-09	1.83612e-09	9.90809e-10	4.69168e-10	5	5	819.548	1034.33	61.6065	71.2032	0.0743974	0.0677157	2.91261	3.01386	0.0322658	0.0293749	0.336338	1.66591	4.87527	0.00196204	1	1	0	0	0	0
sp|O14639-2|ABLM1_HUMAN	O14639-2	sp|O14639-2|ABLM1_HUMAN	>sp|O14639-2|ABLM1_HUMAN Isoform of O14639, Isoform 2 of Actin-binding LIM protein 1 OS=Homo sapiens GN=ABLIM1	ABLIM1	ABLIM1	3983	1	75.7582	56.3146	81.4376	80.9311	95.2532	84.2415	89.6297	88.1924	72.1992	91.8345	0.000207879	0.00451296	1.33787e-06	6.1786e-05	3.02215e-06	2.06535e-06	2.2043e-06	2.5032e-06	0.00107456	9.3584e-06	5	5	77.9389	85.2194	14.0832	7.78669	0.194809	0.0962294	1.88557	1.92899	0.0838179	0.0416956	0.144222	0.653126	1.14422	0.35707	0	1	0	0	0	0
sp|Q6H8Q1-3|ABLM2_HUMAN;sp|Q6H8Q1-2|ABLM2_HUMAN	Q6H8Q1-3;Q6H8Q1-2	sp|Q6H8Q1-3|ABLM2_HUMAN;sp|Q6H8Q1-2|ABLM2_HUMAN	>sp|Q6H8Q1-3|ABLM2_HUMAN Isoform of Q6H8Q1, Isoform 3 of Actin-binding LIM protein 2 OS=Homo sapiens GN=ABLIM2;>sp|Q6H8Q1-2|ABLM2_HUMAN Isoform of Q6H8Q1, Isoform 2 of Actin-binding LIM protein 2 OS=Homo sapiens GN=ABLIM2	ABLIM2	ABLIM2	84448	1	173.61	168.247	163.007	198.11	155.854	138.837	159.648	156.802	143.284	181.246	5.43067e-06	4.73016e-05	1.67606e-08	7.74339e-07	7.49671e-08	1.33523e-05	1.2631e-07	1.72305e-06	2.79882e-07	2.13481e-05	5	5	171.766	155.963	16.1223	16.6402	0.0910672	0.104889	2.23347	2.1911	0.0394683	0.0454283	-0.140761	-0.922838	-1.62046	0.193634	0	0	0	0	0	0
sp|O94929|ABLM3_HUMAN	O94929	sp|O94929|ABLM3_HUMAN	>sp|O94929|ABLM3_HUMAN Actin-binding LIM protein 3 OS=Homo sapiens GN=ABLIM3 PE=1 SV=3	ABLIM3	ABLIM3	22885	1	72.7616	70.624	63.9514	114.011	67.5934	56.5391	51.8192	57.6009	52.2786	65.5785	8.35466e-07	1.92255e-05	5.46141e-07	0.00704865	8.4304e-08	0.000132535	6.59642e-07	1.20507e-05	1.65964e-06	2.27607e-07	5	5	77.7883	56.7632	20.5187	5.54565	0.235155	0.0951887	1.88071	1.75247	0.100756	0.0412467	-0.426005	-1.29304	-2.94688	0.0282276	0	0	0	0	0	0
sp|Q12979-4|ABR_HUMAN	Q12979-4	sp|Q12979-4|ABR_HUMAN	>sp|Q12979-4|ABR_HUMAN Isoform of Q12979, Isoform 4 of Active breakpoint cluster region-related protein OS=Homo sapiens GN=ABR	ABR	ABR	29	7	1147.06	1159.34	1134.6	1065.69	1036.51	1546.62	1522.87	1379.8	1373.97	1656.36	3.59994e-08	1.17163e-06	2.35593e-07	5.27891e-07	5.89484e-07	7.59893e-08	1.42341e-08	7.35726e-08	7.18381e-08	1.33609e-08	5	5	1108.64	1495.93	54.2421	119.785	0.0494747	0.08003	3.04437	3.1738	0.0214735	0.0347011	0.429959	1.76238	6.5024	0.000314132	1	1	0	0	0	0
sp|P09110|THIK_HUMAN	P09110	sp|P09110|THIK_HUMAN	>sp|P09110|THIK_HUMAN 3-ketoacyl-CoA thiolase, peroxisomal OS=Homo sapiens GN=ACAA1 PE=1 SV=2	ACAA1	ACAA1	30	1	416.855	376.882	453.509	413.187	474.001	532.366	516.974	392.083	483.112	554.478	3.75027e-08	1.80812e-07	9.71745e-09	5.79022e-09	1.48532e-08	1.18219e-07	3.38896e-09	1.01888e-08	4.03727e-08	3.20079e-09	5	5	426.887	495.802	37.8064	63.535	0.0892292	0.137412	2.62894	2.6922	0.038675	0.0593983	0.210136	1.09384	2.12048	0.0958137	0	1	0	0	0	0
sp|Q13085-3|ACACA_HUMAN	Q13085-3	sp|Q13085-3|ACACA_HUMAN	>sp|Q13085-3|ACACA_HUMAN Isoform of Q13085, Isoform 3 of Acetyl-CoA carboxylase 1 OS=Homo sapiens GN=ACACA	ACACA	ACACA	31	1	73.8248	73.4095	80.6852	61.9344	89.9469	91.2772	84.6125	74.9045	104.793	93.4875	8.41287e-05	1.88894e-06	0.000257227	2.75839e-06	0.000193993	1.5822e-06	3.58377e-05	4.32058e-05	2.50974e-06	4.9286e-05	5	5	75.9602	89.815	10.3167	11.0607	0.138107	0.124966	1.87733	1.95068	0.0596959	0.0540618	0.243646	1.1086	2.20654	0.0848957	0	1	0	0	0	0
sp|Q9UKU7|ACAD8_HUMAN	Q9UKU7	sp|Q9UKU7|ACAD8_HUMAN	>sp|Q9UKU7|ACAD8_HUMAN Isobutyryl-CoA dehydrogenase, mitochondrial OS=Homo sapiens GN=ACAD8 PE=1 SV=1	ACAD8	ACAD8	27034	2	191.159	196.196	194.828	170.908	173.409	222.173	238.986	235.86	245.799	268.38	6.28545e-07	1.85746e-07	1.15763e-07	1.1735e-05	8.67896e-06	6.52609e-09	5.12689e-06	5.46499e-08	1.16304e-06	2.17552e-08	5	5	185.3	242.24	12.1693	16.9556	0.0665348	0.0691267	2.26711	2.38341	0.0288638	0.0299856	0.386324	1.7285	5.77124	0.000684963	1	1	0	0	0	0
sp|P28330|ACADL_HUMAN	P28330	sp|P28330|ACADL_HUMAN	>sp|P28330|ACADL_HUMAN Long-chain specific acyl-CoA dehydrogenase, mitochondrial OS=Homo sapiens GN=ACADL PE=1 SV=2	ACADL	ACADL	33	1	104.818	93.2686	102.725	97.6795	90.8143	104.929	97.9652	115.169	108.583	105.86	4.30816e-07	2.37813e-06	3.08446e-08	5.51994e-06	2.48312e-07	2.44072e-07	1.29324e-07	7.87789e-08	2.74353e-08	3.95374e-09	5	5	97.8611	106.501	5.97573	6.22899	0.0612063	0.058625	1.98996	2.02676	0.0265567	0.0254387	0.122241	1.17716	1.96635	0.119495	0	1	0	0	0	0
sp|P49748-2|ACADV_HUMAN	P49748-2	sp|P49748-2|ACADV_HUMAN	>sp|P49748-2|ACADV_HUMAN Isoform of P49748, Isoform 2 of Very long-chain specific acyl-CoA dehydrogenase, mitochondrial OS=Homo sapiens GN=ACADVL	ACADVL	ACADVL	37	1	59.9688	52.2257	35.6295	42.955	40.9017	53.1786	44.7722	62.5768	45.4953	68.4872	2.99418e-06	0.0110883	0.000187388	0.0207998	0.0121952	3.38011e-07	5.43307e-06	0.00011009	4.70024e-06	7.00072e-09	5	5	46.3361	54.902	9.69705	10.4586	0.208177	0.190719	1.65847	1.73335	0.0894531	0.0820895	0.248719	0.831474	1.55504	0.211668	0	1	0	0	0	0
tr|Q6PID9|Q6PID9_HUMAN	Q6PID9	tr|Q6PID9|Q6PID9_HUMAN	>tr|Q6PID9|Q6PID9_HUMAN Isoform of P16112, Aggrecan OS=Homo sapiens GN=ACAN PE=1 SV=1	ACAN	ACAN	176	3	442.238	558.907	468.261	372.039	424.698	398.558	461.06	492.154	417.365	451.52	5.85193e-06	7.36348e-09	2.28608e-08	0.000161973	1.1587e-05	1.04598e-06	5.64543e-07	2.66567e-07	8.29096e-07	3.32461e-07	5	5	453.229	444.131	68.7757	36.8805	0.149474	0.0834515	2.65243	2.64631	0.0645576	0.0361797	-0.0203366	-0.123821	-0.197949	0.887923	0	0	0	0	0	1
sp|Q5T8D3-2|ACBD5_HUMAN	Q5T8D3-2	sp|Q5T8D3-2|ACBD5_HUMAN	>sp|Q5T8D3-2|ACBD5_HUMAN Isoform of Q5T8D3, Isoform 2 of Acyl-CoA-binding domain-containing protein 5 OS=Homo sapiens GN=ACBD5	ACBD5	ACBD5	91452	1	37.7391	49.4207	36.7034	53.6723	35.553	56.0526	64.6532	55.5091	51.2874	52.7661	0.0203259	0.0555281	0.00241325	6.16487e-05	0.000188754	3.6256e-05	6.6867e-06	0.000172804	2.45968e-07	1.63972e-05	5	5	42.6177	56.0537	8.32426	5.1907	0.191452	0.0895698	1.62321	1.74718	0.0823993	0.038822	0.411841	1.38984	3.34825	0.0161707	0	1	0	0	0	0
sp|P22303-3|ACES_HUMAN	P22303-3	sp|P22303-3|ACES_HUMAN	>sp|P22303-3|ACES_HUMAN Isoform of P22303, Isoform 4 of Acetylcholinesterase OS=Homo sapiens GN=ACHE	ACHE	ACHE	43	1	90.6355	96.294	91.2362	106.163	71.2896	58.4457	70.5432	91.2488	67.9508	55.4564	0.0109918	9.92904e-05	0.00542283	0.00391133	0.0251229	1.09788e-06	2.04244e-06	8.00357e-08	2.16387e-08	2.2024e-06	5	5	91.1237	68.729	12.7137	14.0797	0.147695	0.196941	1.95601	1.83032	0.0637976	0.0847181	-0.417556	-1.29732	-2.95882	0.0278429	0	0	0	0	0	0
sp|P53396|ACLY_HUMAN	P53396	sp|P53396|ACLY_HUMAN	>sp|P53396|ACLY_HUMAN ATP-citrate synthase OS=Homo sapiens GN=ACLY PE=1 SV=3	ACLY	ACLY	47	15	3379	3374.74	3662.47	3971.39	3794.15	4771.43	4706.11	4699.03	4685.93	4497.65	6.84676e-08	4.73161e-08	6.08796e-10	8.65804e-08	3.1191e-08	6.02643e-09	1.46905e-08	6.86192e-09	2.29547e-09	5.12305e-09	5	5	3636.35	4672.03	261.011	102.923	0.0717945	0.0222785	3.55977	3.66942	0.0311399	0.00967422	0.364244	1.77588	6.25066	0.000415706	1	1	0	0	0	0
sp|Q99798|ACON_HUMAN	Q99798	sp|Q99798|ACON_HUMAN	>sp|Q99798|ACON_HUMAN Aconitate hydratase, mitochondrial OS=Homo sapiens GN=ACO2 PE=1 SV=2	ACO2	ACO2	50	14	23727.2	22956.2	25639.8	23551.7	18057.8	27559.6	25604.7	24623.7	22929	28209.8	4.33087e-08	7.17009e-08	1.77067e-09	4.28627e-08	2.51503e-08	5.89445e-08	2.19223e-08	1.21281e-08	9.06033e-09	3.30019e-08	5	5	22786.5	25785.4	2828.48	2154.44	0.133416	0.0844429	4.35475	4.41015	0.0576863	0.036608	0.184025	1.02393	1.91414	0.129048	0	1	0	0	0	0
sp|O00154|BACH_HUMAN	O00154	sp|O00154|BACH_HUMAN	>sp|O00154|BACH_HUMAN Cytosolic acyl coenzyme A thioester hydrolase OS=Homo sapiens GN=ACOT7 PE=1 SV=3	ACOT7	ACOT7	11332	4	3086.76	3215.7	3731.09	3445.08	3365.85	2803.02	2722.16	2645.24	2424.44	2402.6	3.63357e-08	3.77827e-08	6.5045e-10	6.851e-09	3.00311e-08	2.81531e-08	1.55175e-07	2.0052e-08	8.98399e-09	7.20159e-09	5	5	3368.9	2599.49	244.983	178.867	0.0720698	0.0692903	3.52658	3.41406	0.031259	0.0300564	-0.373791	-1.70551	-5.43993	0.00100362	-1	0	0	0	0	0
sp|Q9Y305-2|ACOT9_HUMAN	Q9Y305-2	sp|Q9Y305-2|ACOT9_HUMAN	>sp|Q9Y305-2|ACOT9_HUMAN Isoform of Q9Y305, Isoform 2 of Acyl-coenzyme A thioesterase 9, mitochondrial OS=Homo sapiens GN=ACOT9	ACOT9	ACOT9	23597	1	180.887	154.43	166.538	168.169	153.063	373.138	370.13	327.928	313.455	434.864	8.09794e-08	1.31764e-07	2.47421e-10	1.34932e-08	2.64511e-08	3.13401e-09	8.0857e-10	2.87776e-09	1.08294e-09	5.72376e-09	5	5	164.617	363.903	11.3831	47.4311	0.0686968	0.128528	2.21565	2.55811	0.0297995	0.0555907	1.1376	1.84788	12.6211	3.8025e-06	1	1	0	0	0	0
sp|P24666-3|PPAC_HUMAN	P24666-3	sp|P24666-3|PPAC_HUMAN	>sp|P24666-3|PPAC_HUMAN Isoform of P24666, Isoform 3 of Low molecular weight phosphotyrosine protein phosphatase OS=Homo sapiens GN=ACP1	ACP1	ACP1	52	2	1063.83	1000.93	1046.44	1001.1	887.53	1245.37	1041	1193.07	1025.81	1007.74	1.39595e-06	1.13504e-06	1.59364e-06	7.36915e-07	3.23522e-06	1.7526e-07	3.39341e-07	1.90705e-07	8.84574e-08	1.04401e-06	5	5	999.967	1102.6	68.7086	108.694	0.07099	0.0971572	2.99913	3.04077	0.0307918	0.0420958	0.13831	1.01264	1.77329	0.157266	0	1	0	0	0	0
sp|Q96GR2|ACBG1_HUMAN	Q96GR2	sp|Q96GR2|ACBG1_HUMAN	>sp|Q96GR2|ACBG1_HUMAN Long-chain-fatty-acid--CoA ligase ACSBG1 OS=Homo sapiens GN=ACSBG1 PE=2 SV=2	ACSBG1	ACSBG1	23205	3	617.901	547.588	602.056	621.733	643.207	619.993	680.875	596.784	773.342	667.071	9.34562e-09	6.62491e-08	2.16544e-09	4.27693e-09	4.87633e-09	3.95226e-09	2.81894e-09	1.93647e-08	1.28444e-08	7.24051e-10	5	5	606.497	667.613	36.0548	68.2627	0.0610885	0.100216	2.78219	2.82276	0.0265057	0.0434145	0.134771	1.01199	1.75934	0.159794	0	1	0	0	0	0
sp|P33121-3|ACSL1_HUMAN	P33121-3	sp|P33121-3|ACSL1_HUMAN	>sp|P33121-3|ACSL1_HUMAN Isoform of P33121, Isoform 3 of Long-chain-fatty-acid--CoA ligase 1 OS=Homo sapiens GN=ACSL1	ACSL1	ACSL1	2180	1	184.605	187.716	185.617	165.799	172.766	170.972	170.807	191.898	171.715	166.518	3.11204e-08	3.53137e-08	3.95651e-09	7.0459e-08	6.27759e-09	2.42729e-07	1.68621e-08	1.56233e-06	6.17166e-08	2.39164e-08	5	5	179.301	174.382	9.5374	10.0024	0.0540139	0.0555854	2.25308	2.24095	0.0234408	0.0241218	-0.0402827	-0.520072	-0.680306	0.593419	0	0	0	0	0	0
sp|O60488-2|ACSL4_HUMAN	O60488-2	sp|O60488-2|ACSL4_HUMAN	>sp|O60488-2|ACSL4_HUMAN Isoform of O60488, Isoform Short of Long-chain-fatty-acid--CoA ligase 4 OS=Homo sapiens GN=ACSL4	ACSL4	ACSL4	2182	1	92.3827	107.259	91.869	70.7905	88.1187	84.5719	75.7583	88.4254	78.4636	18.4005	2.82859e-05	1.35592e-06	2.34756e-08	1.48017e-05	3.50817e-06	0.000150545	4.24101e-06	8.81447e-07	4.77495e-06	0.505565	5	5	90.0841	69.1239	13.0342	28.7893	0.150564	0.751555	1.95085	1.78255	0.0650232	0.290614	-0.559085	-0.773985	-1.46556	0.237717	0	0	0	0	0	0
sp|Q9UKU0-5|ACSL6_HUMAN	Q9UKU0-5	sp|Q9UKU0-5|ACSL6_HUMAN	>sp|Q9UKU0-5|ACSL6_HUMAN Isoform of Q9UKU0, Isoform 5 of Long-chain-fatty-acid--CoA ligase 6 OS=Homo sapiens GN=ACSL6	ACSL6	ACSL6	23305	5	988.523	1125.12	1027.33	1028.59	1246.54	1007.16	980.218	1081.58	1042.99	951.014	2.50258e-08	8.33307e-08	3.15009e-09	3.82256e-07	2.92814e-08	6.6539e-06	2.40184e-08	8.66308e-08	9.21094e-08	3.02985e-08	5	5	1083.22	1012.59	104.289	51.362	0.0936812	0.0506145	3.03317	3.00499	0.0405964	0.0219675	-0.0936116	-0.824716	-1.30735	0.290663	0	0	0	0	0	0
sp|P68133|ACTS_HUMAN	P68133	sp|P68133|ACTS_HUMAN	>sp|P68133|ACTS_HUMAN Actin, alpha skeletal muscle OS=Homo sapiens GN=ACTA1 PE=1 SV=1	ACTA1	ACTA1	58	3	20082.9	20717.1	20875.4	19249.8	18515.5	20681.9	20377.9	19028.7	18021.7	18331.8	3.56309e-06	1.98282e-07	2.90362e-09	1.10921e-06	4.37769e-07	7.08678e-07	3.42247e-08	1.04709e-07	7.5724e-08	3.45747e-07	5	5	19888.1	19288.4	998.937	1195.42	0.0507363	0.0618225	4.29815	4.28463	0.0220203	0.0268236	-0.0449065	-0.558408	-0.745892	0.556974	0	0	0	0	0	0
sp|Q562R1|ACTBL_HUMAN	Q562R1	sp|Q562R1|ACTBL_HUMAN	>sp|Q562R1|ACTBL_HUMAN Beta-actin-like protein 2 OS=Homo sapiens GN=ACTBL2 PE=1 SV=2	ACTBL2	ACTBL2	345651	1	1934.56	2310.94	2161.58	1778.24	1837.63	2588.59	2420.04	2365.27	2044.66	2332.49	5.62783e-08	1.30475e-07	2.0565e-09	4.3394e-08	1.06888e-06	4.37488e-09	6.69473e-09	1.37228e-07	8.94454e-08	4.74791e-09	5	5	2004.59	2350.21	225.006	197.231	0.110986	0.086245	3.29988	3.36984	0.0480533	0.0373864	0.232415	1.27583	2.65137	0.0441439	0	1	0	0	0	0
sp|P63261|ACTG_HUMAN	P63261	sp|P63261|ACTG_HUMAN	>sp|P63261|ACTG_HUMAN Actin, cytoplasmic 2 OS=Homo sapiens GN=ACTG1 PE=1 SV=1	ACTG1	ACTG1	71	11	80870.4	97140.2	89770.8	80218.9	80914.3	86009.4	77976.3	87466.9	80747.2	81105.5	1.60045e-07	5.31142e-08	1.58388e-08	6.51884e-08	2.6747e-07	2.00907e-08	8.21042e-09	4.53891e-08	2.10603e-07	2.00852e-08	5	5	85782.9	82661.1	7478.08	3947.69	0.0851093	0.0476711	4.93213	4.91691	0.0368958	0.0206915	-0.0505567	-0.519074	-0.747561	0.556178	0	0	0	0	0	0
sp|P12814-3|ACTN1_HUMAN	P12814-3	sp|P12814-3|ACTN1_HUMAN	>sp|P12814-3|ACTN1_HUMAN Isoform of P12814, Isoform 3 of Alpha-actinin-1 OS=Homo sapiens GN=ACTN1	ACTN1	ACTN1	87	9	1803.53	1857.04	1767.73	1702.13	1643.6	1450.06	1249.12	1567.35	1243.68	1200.26	7.22191e-08	5.9796e-08	1.2228e-08	4.76683e-08	3.11845e-08	1.22592e-07	1.01646e-08	3.99233e-08	3.40088e-07	4.7281e-07	5	5	1754.81	1342.1	83.8658	158.781	0.048041	0.115867	3.24383	3.12543	0.0208519	0.0501526	-0.393322	-1.6411	-4.89501	0.00191972	-1	0	0	0	0	0
sp|P35609-2|ACTN2_HUMAN;sp|P35609|ACTN2_HUMAN	P35609-2;P35609	sp|P35609-2|ACTN2_HUMAN;sp|P35609|ACTN2_HUMAN	>sp|P35609-2|ACTN2_HUMAN Isoform of P35609, Isoform 2 of Alpha-actinin-2 OS=Homo sapiens GN=ACTN2;>sp|P35609|ACTN2_HUMAN Alpha-actinin-2 OS=Homo sapiens GN=ACTN2 PE=1 SV=1	ACTN2	ACTN2	88	8	757.483	792.429	840.485	743.825	721.769	1182.8	1134.51	1244.92	879.433	1101.49	1.36479e-06	1.42011e-05	2.05763e-05	6.81491e-07	1.81776e-06	3.15423e-08	2.67366e-08	4.4479e-08	1.22483e-06	2.16448e-08	5	5	771.198	1108.63	46.4544	139.039	0.059519	0.134406	2.88655	3.04181	0.0258259	0.0581109	0.51577	1.6847	5.68512	0.000762015	1	1	0	0	0	0
sp|O43707|ACTN4_HUMAN	O43707	sp|O43707|ACTN4_HUMAN	>sp|O43707|ACTN4_HUMAN Alpha-actinin-4 OS=Homo sapiens GN=ACTN4 PE=1 SV=2	ACTN4	ACTN4	81	6	894.75	948.833	874.075	856.528	864.091	906.795	812.642	857.221	872.278	810.215	1.2239e-08	4.1021e-06	5.35109e-08	1.64287e-05	1.46559e-06	6.49708e-09	8.98302e-08	1.21456e-06	1.12097e-07	5.99537e-08	5	5	887.655	851.83	37.0868	41.0362	0.0410633	0.0480772	2.94795	2.92995	0.017826	0.0208676	-0.0597846	-0.873251	-1.11155	0.372067	0	0	0	0	0	0
tr|R4GMT0|R4GMT0_HUMAN	R4GMT0	tr|R4GMT0|R4GMT0_HUMAN	>tr|R4GMT0|R4GMT0_HUMAN Isoform of P61163, Alpha-centractin OS=Homo sapiens GN=ACTR1A PE=1 SV=1	ACTR1A	ACTR1A	10121	5	575.281	566.417	565.335	528.632	600.134	693.417	689.281	609.566	679.086	636.712	8.9431e-07	1.58201e-07	2.49827e-07	1.52152e-05	1.75515e-06	1.21905e-07	2.04002e-08	1.82033e-06	7.64305e-08	2.76175e-07	5	5	567.16	661.613	25.698	36.7807	0.0457222	0.0564789	2.75334	2.82006	0.0198465	0.0245089	0.22161	1.62843	3.86695	0.00760126	0	1	0	0	0	0
sp|P42025|ACTY_HUMAN	P42025	sp|P42025|ACTY_HUMAN	>sp|P42025|ACTY_HUMAN Beta-centractin OS=Homo sapiens GN=ACTR1B PE=1 SV=1	ACTR1B	ACTR1B	10120	3	587.104	632.507	674.741	569.026	462.773	761.061	686.374	593.018	643.601	692.858	7.95178e-09	5.38112e-07	2.0105e-08	8.06982e-08	3.47399e-08	9.39358e-08	4.77773e-08	3.71196e-09	4.03835e-09	2.34321e-07	5	5	585.23	675.382	79.8579	62.3718	0.143819	0.0928768	2.76388	2.82806	0.0621405	0.0402493	0.213195	1.07257	2.0744	0.102048	0	1	0	0	0	0
sp|P61160|ARP2_HUMAN;sp|P61160-2|ARP2_HUMAN	P61160;P61160-2	sp|P61160|ARP2_HUMAN;sp|P61160-2|ARP2_HUMAN	>sp|P61160|ARP2_HUMAN Actin-related protein 2 OS=Homo sapiens GN=ACTR2 PE=1 SV=1;>sp|P61160-2|ARP2_HUMAN Isoform of P61160, Isoform 2 of Actin-related protein 2 OS=Homo sapiens GN=ACTR2	ACTR2	ACTR2	10097	11	10825.3	13032.3	11329.6	11137.7	10847.2	10866.8	10733.4	11333.4	10024.6	9726.53	1.98863e-08	1.38721e-08	9.72052e-10	7.99882e-09	1.18341e-08	1.06883e-07	3.93669e-09	6.26439e-09	1.13194e-08	2.01974e-08	5	5	11434.4	10536.9	917.646	652.097	0.0769794	0.062265	4.05716	4.02204	0.0333824	0.0270152	-0.116641	-1.03	-1.70821	0.171662	0	0	0	0	0	0
sp|P61158|ARP3_HUMAN	P61158	sp|P61158|ARP3_HUMAN	>sp|P61158|ARP3_HUMAN Actin-related protein 3 OS=Homo sapiens GN=ACTR3 PE=1 SV=3	ACTR3	ACTR3	10096	14	10268.6	11045.6	10260.9	10092.2	10306.2	10576.6	11451.1	10833.5	10564.2	10317.4	4.33227e-08	3.66763e-08	1.36679e-09	1.14548e-08	2.84756e-08	1.16837e-07	9.18048e-09	2.27447e-08	3.58746e-08	3.01069e-08	5	5	10394.7	10748.5	373.071	433.079	0.0351854	0.0397148	4.01659	4.03107	0.0152761	0.0172411	0.0480992	0.844356	0.955946	0.444135	0	1	0	0	0	0
sp|Q9P1U1|ARP3B_HUMAN	Q9P1U1	sp|Q9P1U1|ARP3B_HUMAN	>sp|Q9P1U1|ARP3B_HUMAN Actin-related protein 3B OS=Homo sapiens GN=ACTR3B PE=2 SV=1	ACTR3B	ACTR3B	57180	3	546.01	587.588	591.018	543.715	479.738	444.083	427.013	435.483	378.2	376.602	2.51238e-08	1.91868e-08	4.12718e-09	1.3322e-06	1.03634e-06	2.3018e-08	2.26375e-08	4.81997e-09	6.64302e-08	1.84892e-08	5	5	549.614	412.276	44.9632	32.4083	0.0843355	0.0797463	2.73885	2.6141	0.0365616	0.0345785	-0.414423	-1.69008	-5.45158	0.000997414	-1	0	0	0	0	0
sp|Q04771|ACVR1_HUMAN	Q04771	sp|Q04771|ACVR1_HUMAN	>sp|Q04771|ACVR1_HUMAN Activin receptor type-1 OS=Homo sapiens GN=ACVR1 PE=1 SV=1	ACVR1	ACVR1	90	1	1361.78	1270.29	1368.75	1422.36	1426.15	234.502	189.588	587.626	142.094	191.974	1.67858e-05	2.90601e-05	1.18684e-05	4.32828e-05	5.37743e-05	2.56861e-05	0.000344099	1.07578e-05	1.82042e-07	0.0001075	5	5	1369.86	269.157	63.055	181.009	0.0468278	0.585797	3.1363	2.37058	0.0203259	0.235892	-2.54369	-1.76702	-8.35887	5.78053e-05	-1	0	0	0	0	0
tr|B4DKD2|B4DKD2_HUMAN	B4DKD2	tr|B4DKD2|B4DKD2_HUMAN	>tr|B4DKD2|B4DKD2_HUMAN Isoform of O75078, Disintegrin and metalloproteinase domain-containing protein 11 OS=Homo sapiens GN=ADAM11 PE=1 SV=1	ADAM11	ADAM11	4185	6	1477.92	1870.55	1822.42	1602.68	1637.24	1137.7	1094.79	1183.28	1244.38	1169.28	5.62386e-07	2.067e-08	1.61874e-09	1.5645e-08	6.45431e-08	2.36702e-07	4.59002e-08	1.8952e-07	2.15812e-07	8.09003e-09	5	5	1682.16	1165.89	162.183	55.5068	0.096979	0.0475303	3.22424	3.06626	0.0420189	0.0206305	-0.524804	-1.77668	-7.26002	0.000146325	-1	0	0	0	0	0
tr|E7EWD3|E7EWD3_HUMAN	E7EWD3	tr|E7EWD3|E7EWD3_HUMAN	>tr|E7EWD3|E7EWD3_HUMAN Isoform of O75077, Disintegrin and metalloproteinase domain-containing protein 23 OS=Homo sapiens GN=ADAM23 PE=1 SV=2	ADAM23	ADAM23	8745	4	1121.9	1307.72	1237.77	1184.62	1152.36	976.365	975.062	1056.5	1022.07	1065.83	2.10972e-08	3.56523e-08	1.83971e-10	4.71131e-08	1.10982e-08	2.63e-08	1.43173e-09	3.83257e-09	3.66081e-09	6.67933e-09	5	5	1200.88	1019.17	73.5391	42.8854	0.0606437	0.0421547	3.07886	3.00794	0.026313	0.0182994	-0.235588	-1.64722	-4.0781	0.00572261	0	0	0	0	0	0
sp|O75689|ADAP1_HUMAN	O75689	sp|O75689|ADAP1_HUMAN	>sp|O75689|ADAP1_HUMAN Arf-GAP with dual PH domain-containing protein 1 OS=Homo sapiens GN=ADAP1 PE=1 SV=2	ADAP1	ADAP1	11033	1	81.7727	95.0498	93.987	112.792	82.1427	19.4319	30.1787	45.8724	33.0669	17.9724	2.17398e-07	1.19797e-06	4.92929e-07	2.54116e-08	9.47719e-07	0.482966	0.50757	0.00405478	0.439338	0.411947	5	5	93.1488	29.3045	12.6562	11.3501	0.132511	0.404412	1.96609	1.44075	0.0572983	0.169027	-1.74515	-1.74322	-7.55617	0.000113422	-1	0	0	0	0	0
sp|Q08828|ADCY1_HUMAN	Q08828	sp|Q08828|ADCY1_HUMAN	>sp|Q08828|ADCY1_HUMAN Adenylate cyclase type 1 OS=Homo sapiens GN=ADCY1 PE=1 SV=2	ADCY1	ADCY1	107	3	279.065	344.095	274.546	270.683	312.435	213.301	195.242	300.064	251.042	217.665	3.14384e-08	6.42897e-08	4.21672e-06	1.81914e-07	2.50153e-07	0.00889213	3.17935e-05	3.05202e-05	9.27089e-06	0.000858389	5	5	296.165	235.463	31.5085	41.3571	0.103526	0.169453	2.46964	2.36686	0.044841	0.0730724	-0.341432	-1.30519	-2.92839	0.0290112	0	0	0	0	0	0
sp|Q08462-2|ADCY2_HUMAN	Q08462-2	sp|Q08462-2|ADCY2_HUMAN	>sp|Q08462-2|ADCY2_HUMAN Isoform of Q08462, Isoform 2 of Adenylate cyclase type 2 OS=Homo sapiens GN=ADCY2	ADCY2	ADCY2	108	2	252.56	277.293	276.015	263.556	258.9	155.342	204.635	161.613	180.679	166.823	3.31068e-07	1.21532e-06	9.6779e-07	7.30757e-06	9.27586e-06	6.71358e-05	1.91597e-05	0.000387587	2.20176e-05	3.80226e-05	5	5	265.665	173.818	10.7737	19.5959	0.0405806	0.109455	2.42405	2.23798	0.0176167	0.0473944	-0.618101	-1.79432	-8.10347	7.32817e-05	-1	0	0	0	0	0
sp|O95622-2|ADCY5_HUMAN	O95622-2	sp|O95622-2|ADCY5_HUMAN	>sp|O95622-2|ADCY5_HUMAN Isoform of O95622, Isoform 2 of Adenylate cyclase type 5 OS=Homo sapiens GN=ADCY5	ADCY5	ADCY5	111	1	134.058	157.858	166.516	176.022	159.179	90.2381	129.707	130.791	112.796	111.434	9.00031e-05	5.92539e-06	0.000234111	1.69202e-06	1.65447e-05	9.10392e-05	8.91178e-08	0.000119456	0.000237331	0.000606118	5	5	158.727	114.993	15.5668	16.5558	0.102096	0.151532	2.19889	2.05685	0.044225	0.0654365	-0.471863	-1.55196	-4.34579	0.00392008	-1	0	0	0	0	0
sp|O60503|ADCY9_HUMAN	O60503	sp|O60503|ADCY9_HUMAN	>sp|O60503|ADCY9_HUMAN Adenylate cyclase type 9 OS=Homo sapiens GN=ADCY9 PE=1 SV=4	ADCY9	ADCY9	115	9	1678.52	1857.07	1750.74	1667.86	1639.17	1545.55	1517.43	1668.21	1658.13	1661.64	3.27133e-07	4.37787e-08	8.30516e-09	1.60495e-06	5.10907e-07	6.51483e-07	7.17609e-08	4.99118e-08	6.26327e-08	4.87764e-07	5	5	1718.67	1610.19	87.603	72.6197	0.0501251	0.0455731	3.23475	3.20652	0.0217554	0.0197819	-0.0937853	-1.14716	-1.69168	0.175687	0	0	0	0	0	0
sp|P35611-2|ADDA_HUMAN	P35611-2	sp|P35611-2|ADDA_HUMAN	>sp|P35611-2|ADDA_HUMAN Isoform of P35611, Isoform 2 of Alpha-adducin OS=Homo sapiens GN=ADD1	ADD1	ADD1	118	4	1872.68	1991.35	1937.94	1869.75	1651.49	1942.39	1688.53	1670.07	1512.58	1650.69	2.58159e-09	1.15164e-08	1.36521e-10	1.10117e-08	1.19941e-08	1.9259e-09	7.89498e-10	7.7744e-09	1.15044e-08	8.60872e-10	5	5	1864.64	1692.85	129.374	155.789	0.0717684	0.0901232	3.26972	3.22719	0.0311286	0.0390609	-0.14128	-1.05953	-1.86839	0.138065	0	0	0	0	0	0
sp|P35612|ADDB_HUMAN	P35612	sp|P35612|ADDB_HUMAN	>sp|P35612|ADDB_HUMAN Beta-adducin OS=Homo sapiens GN=ADD2 PE=1 SV=3	ADD2	ADD2	119	6	1459.82	1660.7	1529.29	1494.62	1220.94	1419.22	1207.07	1304.79	1119.34	1152.73	9.75327e-09	2.19295e-07	2.17308e-07	1.32352e-07	1.7549e-06	5.15024e-08	3.38303e-07	2.59565e-07	4.73487e-07	5.14409e-07	5	5	1473.08	1240.63	160.137	122.041	0.113485	0.0967858	3.16606	3.092	0.0491285	0.0419356	-0.246022	-1.27427	-2.67814	0.042396	0	0	0	0	0	0
sp|Q9UEY8-2|ADDG_HUMAN	Q9UEY8-2	sp|Q9UEY8-2|ADDG_HUMAN	>sp|Q9UEY8-2|ADDG_HUMAN Isoform of Q9UEY8, Isoform 1 of Gamma-adducin OS=Homo sapiens GN=ADD3	ADD3	ADD3	120	4	899.434	971.233	961.789	1007.38	907.73	1013.04	808.999	965.288	857.06	889.268	5.38056e-08	1.24752e-06	5.92386e-09	1.4749e-05	4.38691e-08	3.28189e-07	1.31665e-06	6.53589e-08	1.135e-06	1.02675e-06	5	5	949.513	906.732	45.3444	82.2419	0.0478104	0.0906197	2.9771	2.95606	0.020752	0.0392752	-0.0699231	-0.665612	-1.0018	0.422629	0	0	0	0	0	0
tr|A2A3C1|A2A3C1_HUMAN	A2A3C1	tr|A2A3C1|A2A3C1_HUMAN	>tr|A2A3C1|A2A3C1_HUMAN Isoform of O60241, Adhesion G protein-coupled receptor B2 OS=Homo sapiens GN=ADGRB2 PE=1 SV=1	ADGRB2	ADGRB2	576	2	264.194	240.645	206.341	198.39	236.539	171.61	164.982	216.758	208.927	179.206	6.92699e-09	0.000509897	4.69526e-06	5.39807e-05	2.17018e-06	0.000451301	2.48932e-07	5.61075e-08	1.23487e-07	7.57343e-06	5	5	229.222	188.296	26.8384	23.1316	0.117975	0.121875	2.35786	2.27226	0.0510588	0.0527345	-0.284364	-1.28611	-2.78696	0.0360473	0	0	0	0	0	0
sp|O60242|AGRB3_HUMAN	O60242	sp|O60242|AGRB3_HUMAN	>sp|O60242|AGRB3_HUMAN Adhesion G protein-coupled receptor B3 OS=Homo sapiens GN=ADGRB3 PE=1 SV=2	ADGRB3	ADGRB3	577	7	1184.39	875.625	1008.66	963.006	1076.33	712.534	721.876	728.317	831.187	734.109	8.22295e-09	1.02322e-07	4.49189e-08	1.02363e-07	6.83641e-07	1.37593e-07	1.03618e-07	1.71876e-07	1.41858e-07	5.98785e-08	5	5	1021.6	745.605	116.625	48.5081	0.114252	0.0626914	3.00703	2.87181	0.0494581	0.0271998	-0.44918	-1.67784	-5.43156	0.00100877	-1	0	0	0	0	0
sp|O94910|AGRL1_HUMAN	O94910	sp|O94910|AGRL1_HUMAN	>sp|O94910|AGRL1_HUMAN Adhesion G protein-coupled receptor L1 OS=Homo sapiens GN=ADGRL1 PE=1 SV=1	ADGRL1	ADGRL1	22859	12	2038.59	2241.49	2239.3	2164.17	2282.72	2059.83	1951.84	2068.32	2162.21	2172.39	4.00541e-07	4.04623e-08	1.24005e-08	3.15615e-07	8.24737e-07	8.80918e-08	1.17994e-07	7.23753e-08	6.65316e-08	2.28679e-08	5	5	2193.25	2082.92	96.4593	89.7476	0.0448168	0.0434945	3.34074	3.31835	0.0194539	0.0188805	-0.0744078	-1.03761	-1.39059	0.262202	0	0	0	0	0	0
tr|E7EVD6|E7EVD6_HUMAN	E7EVD6	tr|E7EVD6|E7EVD6_HUMAN	>tr|E7EVD6|E7EVD6_HUMAN Isoform of Q9HAR2, Adhesion G protein-coupled receptor L3 OS=Homo sapiens GN=ADGRL3 PE=1 SV=1	ADGRL3	ADGRL3	23284	7	826.455	832.392	916.94	873.071	883.653	738.586	646.1	711.378	714.413	644.749	3.5018e-08	2.56096e-07	1.13658e-08	1.87507e-06	5.10248e-08	1.13469e-07	8.14047e-08	8.48094e-07	2.10509e-07	3.79275e-08	5	5	866.502	691.045	37.5784	42.9622	0.0432967	0.0626963	2.93744	2.83883	0.0187947	0.027202	-0.327594	-1.74677	-5.58199	0.000856835	-1	0	0	0	0	0
sp|P11766|ADHX_HUMAN	P11766	sp|P11766|ADHX_HUMAN	>sp|P11766|ADHX_HUMAN Alcohol dehydrogenase class-3 OS=Homo sapiens GN=ADH5 PE=1 SV=4	ADH5	ADH5	128	1	49.0267	88.2328	82.7277	84.1082	67.0112	76.2389	82.5467	68.898	65.0596	74.3698	0.00368715	1.79402e-05	1.33514e-07	0.000129471	3.36644e-06	2.94145e-06	2.02698e-06	2.29391e-07	2.94023e-06	4.37674e-07	5	5	74.2213	73.4226	16.2264	6.75443	0.247217	0.0922725	1.86094	1.86436	0.105777	0.0399885	0.0113553	0.0453292	0.0758464	0.957575	0	1	0	0	0	0
sp|P55263-3|ADK_HUMAN	P55263-3	sp|P55263-3|ADK_HUMAN	>sp|P55263-3|ADK_HUMAN Isoform of P55263, Isoform 3 of Adenosine kinase OS=Homo sapiens GN=ADK	ADK	ADK	132	2	162.416	175.145	187.142	200.495	189.91	140.51	174.187	169.804	162.165	143.074	1.94481e-05	4.78711e-06	1.29573e-06	1.30663e-05	0.000116088	0.191143	0.023325	0.114232	0.162487	0.257208	5	5	183.021	157.948	14.6319	15.3896	0.0812862	0.0988597	2.26137	2.19684	0.035244	0.0428299	-0.21437	-1.28445	-2.6265	0.0458109	0	0	0	0	0	0
sp|P25098|ARBK1_HUMAN	P25098	sp|P25098|ARBK1_HUMAN	>sp|P25098|ARBK1_HUMAN Beta-adrenergic receptor kinase 1 OS=Homo sapiens GN=ADRBK1 PE=1 SV=2	ADRBK1	ADRBK1	156	2	203.446	187.925	178.635	182.845	151.458	180.35	173.863	155.854	149.415	163.884	8.8491e-06	0.000919858	8.35155e-06	0.000434873	0.000266492	3.62834e-07	1.39147e-06	1.26515e-05	0.00065102	9.27046e-06	5	5	180.862	164.673	18.9302	12.6631	0.108671	0.0770841	2.25536	2.21559	0.0470566	0.0334276	-0.132083	-0.907435	-1.57025	0.207369	0	0	0	0	0	0
sp|P30520|PURA2_HUMAN	P30520	sp|P30520|PURA2_HUMAN	>sp|P30520|PURA2_HUMAN Adenylosuccinate synthetase isozyme 2 OS=Homo sapiens GN=ADSS PE=1 SV=3	ADSS	ADSS	159	4	418.339	386.365	455.948	446.53	412.065	376.211	353.487	332.731	340.755	333.814	4.18224e-07	2.39889e-07	2.69473e-08	6.77614e-07	4.39849e-08	1.69129e-07	6.18894e-09	4.77685e-07	3.45421e-06	1.68889e-07	5	5	423.849	347.4	27.9241	18.104	0.0663511	0.0511936	2.62645	2.54037	0.0287843	0.0222186	-0.285959	-1.67347	-4.6293	0.00267833	-1	0	0	0	0	0
sp|Q9Y4W6|AFG32_HUMAN	Q9Y4W6	sp|Q9Y4W6|AFG32_HUMAN	>sp|Q9Y4W6|AFG32_HUMAN AFG3-like protein 2 OS=Homo sapiens GN=AFG3L2 PE=1 SV=2	AFG3L2	AFG3L2	10939	9	2387.31	1787.63	2138.96	1912.22	2242.64	2635.89	2492.02	2368.21	2782.72	2848.44	4.61177e-08	5.64542e-08	1.36504e-08	3.43691e-08	3.29449e-07	1.05144e-08	1.04066e-08	1.46015e-08	3.3173e-09	6.64034e-09	5	5	2093.75	2625.46	243.441	199.09	0.118149	0.0765529	3.31854	3.41819	0.0511339	0.033198	0.331055	1.50057	3.7727	0.00861533	0	1	0	0	0	0
tr|F8VVT9|F8VVT9_HUMAN;sp|Q99490|AGAP2_HUMAN	F8VVT9;Q99490	tr|F8VVT9|F8VVT9_HUMAN;sp|Q99490|AGAP2_HUMAN	>tr|F8VVT9|F8VVT9_HUMAN Isoform of Q99490, Arf-GAP with GTPase, ANK repeat and PH domain-containing protein 2 OS=Homo sapiens GN=AGAP2 PE=1 SV=1;>sp|Q99490|AGAP2_HUMAN Arf-GAP with GTPase, ANK repeat and PH domain-containing protein 2 OS=Homo sapiens GN=AGAP2 PE=1 SV=2	AGAP2	AGAP2	116986	10	2212.38	2155.75	2163.8	2174.88	2081.21	2091.19	2153.79	2173.22	1987.23	2329.65	1.91011e-08	7.57831e-08	3.08554e-09	7.29834e-09	3.36594e-08	2.07895e-08	1.26027e-09	2.50236e-08	7.56524e-09	3.89332e-09	5	5	2157.6	2147.02	47.8967	125.234	0.0223654	0.0581172	3.33389	3.33125	0.00971195	0.0252187	-0.0087603	-0.145942	-0.163934	0.907718	0	0	0	0	0	0
sp|Q96P47|AGAP3_HUMAN;sp|Q96P47-3|AGAP3_HUMAN	Q96P47;Q96P47-3	sp|Q96P47|AGAP3_HUMAN;sp|Q96P47-3|AGAP3_HUMAN	>sp|Q96P47|AGAP3_HUMAN Arf-GAP with GTPase, ANK repeat and PH domain-containing protein 3 OS=Homo sapiens GN=AGAP3 PE=1 SV=2;>sp|Q96P47-3|AGAP3_HUMAN Isoform of Q96P47, Isoform 3 of Arf-GAP with GTPase, ANK repeat and PH domain-containing protein 3 OS=Homo sapiens GN=AGAP3	AGAP3	AGAP3	116988	6	1114.27	1289.61	1201.49	1224.42	1179.82	1400.63	1411.5	1301.84	1300.08	1377.48	8.42731e-09	1.96128e-07	1.33961e-09	2.77454e-08	7.81792e-08	8.12789e-08	1.29199e-08	1.52123e-08	1.07314e-08	1.22778e-07	5	5	1201.92	1358.31	63.964	53.7747	0.0533617	0.0398084	3.07938	3.13272	0.0231582	0.0172817	0.177195	1.56517	3.22153	0.0195189	0	1	0	0	0	0
sp|P52594-2|AGFG1_HUMAN	P52594-2	sp|P52594-2|AGFG1_HUMAN	>sp|P52594-2|AGFG1_HUMAN Isoform of P52594, Isoform 2 of Arf-GAP domain and FG repeat-containing protein 1 OS=Homo sapiens GN=AGFG1	AGFG1	AGFG1	3267	1	88.7801	110.626	103.646	96.0175	96.3591	38.1978	26.6766	65.0391	46.9932	29.9891	4.52987e-09	8.4415e-08	9.16393e-08	5.89649e-09	1.22245e-07	0.298197	0.24309	2.68128e-06	0.00185248	0.0714642	5	5	99.0858	41.3792	8.32199	15.3894	0.0837394	0.368671	1.99479	1.59407	0.0363041	0.155038	-1.33118	-1.69527	-6.43451	0.000342111	-1	0	0	0	1	0
sp|O95081|AGFG2_HUMAN	O95081	sp|O95081|AGFG2_HUMAN	>sp|O95081|AGFG2_HUMAN Arf-GAP domain and FG repeat-containing protein 2 OS=Homo sapiens GN=AGFG2 PE=1 SV=2	AGFG2	AGFG2	3268	1	67.1121	68.4316	59.8915	66.5926	59.0769	46.4174	49.4002	44.2132	31.9948	46.858	4.61174e-07	1.38077e-06	6.76644e-06	1.734e-05	4.95843e-05	2.69508e-05	5.77022e-05	6.30643e-05	2.3372e-05	0.000774442	5	5	64.2209	43.7767	4.38517	6.83916	0.069204	0.17483	1.80685	1.63636	0.030019	0.0753571	-0.56635	-1.62567	-5.09743	0.00149519	-1	0	0	0	0	0
sp|Q53H12|AGK_HUMAN	Q53H12	sp|Q53H12|AGK_HUMAN	>sp|Q53H12|AGK_HUMAN Acylglycerol kinase, mitochondrial OS=Homo sapiens GN=AGK PE=1 SV=2	AGK	AGK	55750	4	1862.11	1683.46	1998.2	1850.4	2134.75	1767.4	1519.23	1616.17	1695.01	2045.83	9.52452e-09	5.78447e-09	1.46876e-10	6.28684e-09	5.65284e-09	9.15039e-09	2.43169e-09	4.11613e-08	2.70929e-09	2.35458e-08	5	5	1905.79	1728.73	169.829	199.841	0.089421	0.112527	3.27869	3.2355	0.0387577	0.0487164	-0.143492	-0.912522	-1.60857	0.196632	0	0	0	0	0	0
sp|P35573-2|GDE_HUMAN	P35573-2	sp|P35573-2|GDE_HUMAN	>sp|P35573-2|GDE_HUMAN Isoform of P35573, Isoform 5 of Glycogen debranching enzyme OS=Homo sapiens GN=AGL	AGL	AGL	178	2	162.137	188.188	173.396	195.917	168.767	264.696	234.85	261.078	263.072	287.696	0.00537414	5.88439e-05	1.16843e-05	0.00279738	0.000243278	1.66517e-06	7.99302e-07	2.81098e-07	2.50054e-08	3.01699e-06	5	5	177.681	262.279	13.9857	18.7502	0.0782904	0.0722919	2.24857	2.41786	0.0339492	0.0313551	0.562368	1.79346	7.8476	8.93054e-05	1	1	0	0	0	0
sp|Q99943|PLCA_HUMAN	Q99943	sp|Q99943|PLCA_HUMAN	>sp|Q99943|PLCA_HUMAN 1-acyl-sn-glycerol-3-phosphate acyltransferase alpha OS=Homo sapiens GN=AGPAT1 PE=1 SV=2	AGPAT1	AGPAT1	10554	2	507.784	551.724	575.827	513.386	477.615	555.547	471.236	526.899	535.651	549.311	6.07195e-07	5.43655e-07	2.30749e-07	2.21864e-06	1.62427e-05	2.8387e-06	3.0111e-05	5.58779e-06	1.23054e-05	2.57018e-05	5	5	525.267	527.729	38.6452	33.5207	0.0735	0.065789	2.71944	2.72168	0.0318777	0.028541	0.00742184	0.0782575	0.108948	0.94045	0	1	0	0	0	0
sp|Q9NRZ7-2|PLCC_HUMAN	Q9NRZ7-2	sp|Q9NRZ7-2|PLCC_HUMAN	>sp|Q9NRZ7-2|PLCC_HUMAN Isoform of Q9NRZ7, Isoform 2 of 1-acyl-sn-glycerol-3-phosphate acyltransferase gamma OS=Homo sapiens GN=AGPAT3	AGPAT3	AGPAT3	56894	1	56.4119	95.9677	67.145	69.0816	85.4979	69.0859	77.8135	95.685	72.8355	66.9125	1.14695e-07	2.54198e-07	6.55171e-06	0.000118175	2.69466e-06	5.08302e-06	2.2698e-08	3.9777e-07	5.28974e-06	2.23404e-06	5	5	74.8208	76.4665	15.7475	11.512	0.212117	0.142763	1.86637	1.87983	0.0911097	0.0616887	0.0447204	0.182674	0.306353	0.819289	0	1	0	0	0	0
sp|Q9NRZ5|PLCD_HUMAN	Q9NRZ5	sp|Q9NRZ5|PLCD_HUMAN	>sp|Q9NRZ5|PLCD_HUMAN 1-acyl-sn-glycerol-3-phosphate acyltransferase delta OS=Homo sapiens GN=AGPAT4 PE=1 SV=1	AGPAT4	AGPAT4	56895	1	100.503	109.721	89.7574	88.2864	94.3589	118.257	111.735	128.061	105.266	136.313	5.33163e-06	6.69246e-06	5.39139e-07	1.22937e-05	8.62589e-06	5.35851e-07	2.66692e-07	1.44816e-07	2.43195e-08	3.18068e-07	5	5	96.5253	119.926	8.77957	12.445	0.0892801	0.103744	1.98324	2.07705	0.0386969	0.044935	0.311626	1.48188	3.62863	0.0105932	0	1	0	0	0	0
sp|P23526|SAHH_HUMAN	P23526	sp|P23526|SAHH_HUMAN	>sp|P23526|SAHH_HUMAN Adenosylhomocysteinase OS=Homo sapiens GN=AHCY PE=1 SV=4	AHCY	AHCY	191	7	984.014	920.559	998.554	968.833	1009.06	1180.07	1084.76	1163.77	1131.68	1017.97	9.27015e-08	1.48914e-07	1.48628e-07	1.61342e-06	3.9491e-07	1.01929e-08	1.45888e-09	3.43223e-08	5.25021e-09	3.39629e-09	5	5	976.204	1115.65	34.6073	65.6107	0.0359711	0.0598716	2.98932	3.04691	0.015617	0.0259786	0.191326	1.5794	3.40281	0.014922	0	1	0	0	0	0
sp|O43865|SAHH2_HUMAN	O43865	sp|O43865|SAHH2_HUMAN	>sp|O43865|SAHH2_HUMAN Adenosylhomocysteinase 2 OS=Homo sapiens GN=AHCYL1 PE=1 SV=2	AHCYL1	AHCYL1	10768	2	697.815	613.463	594.316	651.534	657.282	610.749	582.061	629.389	667.527	778.214	1.44085e-06	2.17891e-07	6.98868e-08	2.62452e-06	1.071e-06	1.3233e-07	2.07997e-07	2.12527e-07	1.78877e-07	1.63237e-05	5	5	642.882	653.588	40.3854	76.261	0.0627992	0.112406	2.80745	2.81306	0.0272465	0.048664	0.0186583	0.150585	0.227664	0.869022	0	1	0	0	0	0
sp|Q96HN2-2|SAHH3_HUMAN	Q96HN2-2	sp|Q96HN2-2|SAHH3_HUMAN	>sp|Q96HN2-2|SAHH3_HUMAN Isoform of Q96HN2, Isoform 2 of Adenosylhomocysteinase 3 OS=Homo sapiens GN=AHCYL2	AHCYL2	AHCYL2	23382	1	262.688	257.333	260.57	295.538	268.652	202.028	196.078	182.387	177.352	218.134	1.67546e-09	3.62852e-09	1.20968e-10	2.54644e-09	3.64357e-08	3.02765e-09	8.38904e-09	1.10155e-09	1.01498e-08	1.11309e-09	5	5	268.956	195.196	15.4224	16.2489	0.0556924	0.0827678	2.42913	2.28928	0.0241682	0.0358843	-0.464586	-1.76691	-6.77148	0.000236824	-1	0	0	0	0	0
sp|O95433|AHSA1_HUMAN	O95433	sp|O95433|AHSA1_HUMAN	>sp|O95433|AHSA1_HUMAN Activator of 90 kDa heat shock protein ATPase homolog 1 OS=Homo sapiens GN=AHSA1 PE=1 SV=1	AHSA1	AHSA1	10598	2	557.74	540.404	550.232	615.155	506.676	576.464	464.517	550.54	504.819	532.742	9.70369e-07	4.69088e-06	2.13766e-05	1.24156e-06	0.00108592	4.39626e-08	3.58587e-07	8.13063e-07	3.452e-06	8.494e-06	5	5	554.041	525.816	39.3463	43.0783	0.0701368	0.0834018	2.74268	2.71964	0.0304227	0.0361582	-0.0765348	-0.682403	-1.05197	0.399137	0	0	0	0	0	0
sp|O95831-3|AIFM1_HUMAN	O95831-3	sp|O95831-3|AIFM1_HUMAN	>sp|O95831-3|AIFM1_HUMAN Isoform of O95831, Isoform 3 of Apoptosis-inducing factor 1, mitochondrial OS=Homo sapiens GN=AIFM1	AIFM1	AIFM1	9131	4	1798.21	1368.27	1492.06	1338.24	1602.37	1289.79	1258.08	1299.02	1438.03	1483.11	2.44488e-09	7.04177e-09	2.35888e-10	5.56967e-09	4.23469e-09	1.42522e-08	1.13339e-09	1.96465e-09	6.63826e-10	4.7792e-10	5	5	1519.83	1353.61	187.767	100.097	0.121353	0.0731881	3.17922	3.13056	0.0525105	0.0317427	-0.161651	-1.00788	-1.8329	0.14471	0	0	0	0	0	0
sp|Q96NN9-3|AIFM3_HUMAN	Q96NN9-3	sp|Q96NN9-3|AIFM3_HUMAN	>sp|Q96NN9-3|AIFM3_HUMAN Isoform of Q96NN9, Isoform 3 of Apoptosis-inducing factor 3 OS=Homo sapiens GN=AIFM3	AIFM3	AIFM3	150209	1	68.6817	69.212	53.181	59.8122	58.5294	82.7049	72.2422	83.8093	90.211	86.5574	0.000139836	0.000230852	0.0236587	2.74806e-05	0.00117694	5.73233e-07	1.00117e-08	3.52454e-06	3.36083e-06	1.68761e-06	5	5	61.8833	83.105	6.91365	6.72815	0.112711	0.0839147	1.78939	1.91844	0.0487954	0.0363798	0.428685	1.62943	4.89164	0.00191972	1	1	0	0	0	0
sp|O00170|AIP_HUMAN	O00170	sp|O00170|AIP_HUMAN	>sp|O00170|AIP_HUMAN AH receptor-interacting protein OS=Homo sapiens GN=AIP PE=1 SV=2	AIP	AIP	9049	2	174.864	177.934	186.877	203.454	145.2	237.514	271.943	226.943	220.29	241.199	0.00972697	0.000143605	3.63148e-05	3.22089e-05	2.15734e-06	7.69185e-07	1.15885e-06	4.23224e-05	4.84089e-05	7.5761e-05	5	5	177.666	239.578	21.2828	19.9128	0.124697	0.0809437	2.24699	2.37829	0.0539464	0.035096	0.436173	1.61257	4.76195	0.00227073	1	1	0	0	0	0
sp|P00568|KAD1_HUMAN	P00568	sp|P00568|KAD1_HUMAN	>sp|P00568|KAD1_HUMAN Adenylate kinase isoenzyme 1 OS=Homo sapiens GN=AK1 PE=1 SV=3	AK1	AK1	203	3	1268.38	1205.62	1422.8	1302.6	1452.1	1230.47	842.725	1415.08	859.66	627.195	6.59252e-08	2.32287e-08	2.26549e-09	1.11519e-08	5.45647e-09	6.3664e-08	5.13505e-07	1.16411e-08	1.43746e-06	2.70476e-07	5	5	1330.3	995.026	104.328	319.647	0.078483	0.333709	3.12288	2.97965	0.0340324	0.14112	-0.475795	-1.16696	-2.51276	0.0543411	0	0	0	0	0	0
tr|G3V213|G3V213_HUMAN	G3V213	tr|G3V213|G3V213_HUMAN	>tr|G3V213|G3V213_HUMAN Isoform of P54819, Adenylate kinase 2, isoform CRA_a OS=Homo sapiens GN=AK2 PE=1 SV=1	AK2	AK2	204	1	80.9735	73.3598	65.277	98.1034	66.7505	70.4114	51.9584	68.5349	62.1697	72.3622	6.249e-06	1.23814e-06	6.66478e-08	6.44741e-06	1.73727e-05	7.05098e-06	0.000733852	0.000253741	1.60376e-05	1.52248e-05	5	5	76.8928	65.0873	13.3867	8.27701	0.167296	0.135415	1.88094	1.81046	0.0721548	0.0585432	-0.234129	-0.975786	-1.86999	0.13788	0	0	0	0	0	0
sp|Q9UIJ7|KAD3_HUMAN	Q9UIJ7	sp|Q9UIJ7|KAD3_HUMAN	>sp|Q9UIJ7|KAD3_HUMAN GTP:AMP phosphotransferase AK3, mitochondrial OS=Homo sapiens GN=AK3 PE=1 SV=4	AK3	AK3	50808	1	315.327	331.857	322.193	329.635	306.928	379.806	378.415	350.392	322.762	412.623	1.23488e-08	1.03855e-07	1.28649e-06	1.2459e-07	6.28055e-08	1.00287e-08	4.25645e-08	2.45277e-09	3.75824e-09	8.40754e-08	5	5	321.188	368.8	10.2943	33.8837	0.0322271	0.0930398	2.50658	2.5653	0.0139924	0.0403196	0.195079	1.39683	2.86832	0.0317262	0	1	0	0	0	0
sp|Q9Y6K8-3|KAD5_HUMAN	Q9Y6K8-3	sp|Q9Y6K8-3|KAD5_HUMAN	>sp|Q9Y6K8-3|KAD5_HUMAN Isoform of Q9Y6K8, Isoform 3 of Adenylate kinase isoenzyme 5 OS=Homo sapiens GN=AK5	AK5	AK5	26289	4	370.372	460.763	411.576	401.763	419.206	558.945	716.503	505.573	416.981	642.992	3.74982e-05	1.78997e-05	1.09822e-05	1.13497e-05	1.98791e-05	1.31149e-05	4.03544e-09	5.4121e-08	1.16966e-06	9.34811e-09	5	5	412.736	568.199	32.6534	116.686	0.0788478	0.212836	2.61459	2.74694	0.0341901	0.0914118	0.439643	1.38745	3.35988	0.0159046	0	1	0	0	0	0
sp|O43687-2|AKA7A_HUMAN	O43687-2	sp|O43687-2|AKA7A_HUMAN	>sp|O43687-2|AKA7A_HUMAN Isoform of Q9P0M2, Isoform Alpha of A-kinase anchor protein 7 isoforms alpha and beta OS=Homo sapiens GN=AKAP7	AKAP7	AKAP7	9465	1	76.494	79.217	69.8989	67.7868	80.1519	29.7014	20.3316	59.4248	49.6822	34.702	8.18432e-07	4.24734e-09	7.73999e-09	5.7052e-08	4.79464e-09	0.000378852	0.529226	9.71252e-07	4.32382e-08	0.000116295	5	5	74.7097	38.7684	5.57195	15.6881	0.0755951	0.443965	1.8724	1.55829	0.0327838	0.184208	-1.04342	-1.51536	-4.31559	0.00408357	-1	0	0	0	0	0
sp|P14550|AK1A1_HUMAN	P14550	sp|P14550|AK1A1_HUMAN	>sp|P14550|AK1A1_HUMAN Alcohol dehydrogenase [NADP(+)] OS=Homo sapiens GN=AKR1A1 PE=1 SV=3	AKR1A1	AKR1A1	10327	3	933.797	869.093	949.755	928.568	881.072	1110.83	1031.82	1026.75	964.717	1006.93	4.31792e-09	1.41547e-08	2.39631e-10	5.98642e-09	1.03052e-08	7.12215e-09	9.15399e-10	3.51367e-09	1.50826e-08	8.66497e-09	5	5	912.457	1028.21	35.2547	53.2099	0.0388733	0.0512246	2.95995	3.01162	0.0168761	0.022232	0.171652	1.5666	3.1686	0.0208721	0	1	0	0	0	0
sp|C9JRZ8|AK1BF_HUMAN	C9JRZ8	sp|C9JRZ8|AK1BF_HUMAN	>sp|C9JRZ8|AK1BF_HUMAN Aldo-keto reductase family 1 member B15 OS=Homo sapiens GN=AKR1B15 PE=1 SV=2	AKR1B15	AKR1B15	441282	1	93.8479	108.686	87.1221	55.7759	90.8349	34.0025	39.2393	36.3035	66.3445	23.2205	0.000568846	2.24333e-07	1.32971e-06	5.77405e-05	3.25407e-07	0.00708018	0.00223099	0.277057	0.079369	0.0796595	5	5	87.2533	39.822	19.4069	16.0128	0.255371	0.390579	1.93068	1.57457	0.109159	0.163642	-1.18298	-1.55533	-4.66022	0.0025819	-1	0	0	0	0	0
sp|Q13740-2|CD166_HUMAN	Q13740-2	sp|Q13740-2|CD166_HUMAN	>sp|Q13740-2|CD166_HUMAN Isoform of Q13740, Isoform 2 of CD166 antigen OS=Homo sapiens GN=ALCAM	ALCAM	ALCAM	214	5	1716.68	1693.85	1794.16	1710.26	1891.01	1400.08	1511.21	1479.4	1512.11	1444.24	1.685e-08	2.57546e-08	3.58005e-10	2.78925e-09	3.46016e-08	9.98951e-08	7.31443e-09	1.51297e-08	1.45677e-07	1.56995e-06	5	5	1761.19	1469.41	82.2339	47.7235	0.0459446	0.0327449	3.24544	3.16696	0.019943	0.0142171	-0.260702	-1.76484	-5.07009	0.00153968	-1	0	0	0	0	0
sp|P00352|AL1A1_HUMAN	P00352	sp|P00352|AL1A1_HUMAN	>sp|P00352|AL1A1_HUMAN Retinal dehydrogenase 1 OS=Homo sapiens GN=ALDH1A1 PE=1 SV=2	ALDH1A1	ALDH1A1	216	1	145.577	147.508	115.878	88.5718	135.351	85.3029	81.7841	76.8775	39.8639	35.0055	7.46969e-06	1.93496e-05	9.75233e-06	0.000761561	6.75158e-06	0.0470882	0.0709631	0.00375467	0.14648	0.014994	5	5	126.577	63.7668	24.6728	24.2841	0.215323	0.45027	2.09493	1.77483	0.0924562	0.186597	-1.06336	-1.46509	-3.96244	0.00665652	0	0	0	0	0	0
sp|P30837|AL1B1_HUMAN	P30837	sp|P30837|AL1B1_HUMAN	>sp|P30837|AL1B1_HUMAN Aldehyde dehydrogenase X, mitochondrial OS=Homo sapiens GN=ALDH1B1 PE=1 SV=3	ALDH1B1	ALDH1B1	219	5	464.366	427.648	435.177	448.836	356.576	816.913	860.838	828.908	780.524	849.261	4.73203e-08	5.8923e-07	3.25158e-08	1.98551e-06	1.03859e-05	6.52081e-08	3.03256e-09	1.80457e-08	1.37839e-08	1.73073e-09	5	5	426.52	827.289	41.5291	31.247	0.10303	0.0381407	2.62817	2.91741	0.0446272	0.0165583	0.960821	1.85755	13.1406	3.58031e-06	1	1	0	0	0	0
sp|O75891|AL1L1_HUMAN	O75891	sp|O75891|AL1L1_HUMAN	>sp|O75891|AL1L1_HUMAN Cytosolic 10-formyltetrahydrofolate dehydrogenase OS=Homo sapiens GN=ALDH1L1 PE=1 SV=2	ALDH1L1	ALDH1L1	10840	4	1013.75	1048.97	1140.84	1190.65	1095.66	630.407	586.626	518.082	722.399	708.941	6.77e-09	2.30451e-08	1.48941e-07	1.25198e-07	1.98427e-08	2.05263e-06	1.58837e-08	1.59555e-06	3.73263e-08	1.38951e-08	5	5	1097.97	633.291	70.5806	85.3259	0.0642494	0.138482	3.03988	2.79835	0.0278744	0.0598566	-0.80232	-1.79318	-8.58053	4.92778e-05	-1	0	0	0	0	0
sp|P05091|ALDH2_HUMAN	P05091	sp|P05091|ALDH2_HUMAN	>sp|P05091|ALDH2_HUMAN Aldehyde dehydrogenase, mitochondrial OS=Homo sapiens GN=ALDH2 PE=1 SV=2	ALDH2	ALDH2	217	5	1296.28	1262.85	1498.24	1264.37	1198.44	1123.84	1175.54	1039.41	1153.64	1073.52	1.78493e-08	1.94634e-08	2.06465e-10	1.45558e-08	1.21376e-08	4.43098e-08	1.76554e-09	3.03801e-08	3.0881e-08	1.64267e-09	5	5	1304.04	1113.19	114.232	56.2431	0.0843826	0.050895	3.11403	3.04612	0.0365819	0.0220891	-0.225571	-1.48446	-3.31392	0.0169821	0	0	0	0	0	0
sp|P51649|SSDH_HUMAN	P51649	sp|P51649|SSDH_HUMAN	>sp|P51649|SSDH_HUMAN Succinate-semialdehyde dehydrogenase, mitochondrial OS=Homo sapiens GN=ALDH5A1 PE=1 SV=2	ALDH5A1	ALDH5A1	7915	1	228.204	246.199	235.797	248.91	80.1098	294.731	107.279	253.368	87.9295	269.434	9.28306e-05	3.85867e-05	3.58664e-08	1.14211e-05	4.56324e-07	1.72906e-06	1.57569e-08	5.1033e-06	9.36561e-08	5.86441e-08	5	5	207.844	202.548	71.8843	97.1696	0.522428	0.620771	2.28437	2.25566	0.213345	0.24795	-0.0954013	-0.13138	-0.227902	0.869022	0	0	0	0	0	0
sp|Q02252|MMSA_HUMAN	Q02252	sp|Q02252|MMSA_HUMAN	>sp|Q02252|MMSA_HUMAN Methylmalonate-semialdehyde dehydrogenase [acylating], mitochondrial OS=Homo sapiens GN=ALDH6A1 PE=1 SV=2	ALDH6A1	ALDH6A1	4329	6	1272.93	1547.62	1278.49	1132.04	1091.52	1548.75	1363.61	1369.41	1418.93	1561.89	7.87613e-08	5.41732e-07	3.46833e-08	1.50171e-06	1.01282e-06	2.68595e-07	5.61704e-08	3.66426e-07	8.51966e-08	3.152e-08	5	5	1264.52	1452.52	178.811	96.3872	0.137187	0.0659853	3.09861	3.16136	0.0593022	0.0286259	0.208456	1.14169	2.23427	0.0819957	0	1	0	0	0	0
sp|P49419-2|AL7A1_HUMAN	P49419-2	sp|P49419-2|AL7A1_HUMAN	>sp|P49419-2|AL7A1_HUMAN Isoform of P49419, Isoform 2 of Alpha-aminoadipic semialdehyde dehydrogenase OS=Homo sapiens GN=ALDH7A1	ALDH7A1	ALDH7A1	501	2	231.441	322.368	323.163	322.676	326.811	269.01	278.54	276.882	310.24	303.617	0.000142283	6.74612e-07	1.82389e-05	1.26883e-05	0.00205566	1.95926e-06	1.762e-07	9.14858e-05	1.5536e-05	2.12588e-07	5	5	305.292	287.658	41.3226	18.1082	0.151057	0.0625145	2.48106	2.45819	0.0652337	0.0271232	-0.0759412	-0.470235	-0.768409	0.545422	0	0	0	0	0	0
sp|P04075|ALDOA_HUMAN	P04075	sp|P04075|ALDOA_HUMAN	>sp|P04075|ALDOA_HUMAN Fructose-bisphosphate aldolase A OS=Homo sapiens GN=ALDOA PE=1 SV=2	ALDOA	ALDOA	226	7	23582.6	28857.1	28922.3	27843.4	24893.3	20373.9	21557.7	19532.2	21222.9	19713.4	1.54726e-08	1.15392e-08	3.0588e-09	2.95037e-08	1.17159e-08	3.98092e-09	2.16238e-09	3.40182e-09	5.58542e-08	1.1309e-08	5	5	26819.7	20480.1	2439.75	895.896	0.0930767	0.0436794	4.42698	4.311	0.0403355	0.0189607	-0.385267	-1.70644	-5.50761	0.000939756	-1	0	0	0	0	0
sp|P09972|ALDOC_HUMAN	P09972	sp|P09972|ALDOC_HUMAN	>sp|P09972|ALDOC_HUMAN Fructose-bisphosphate aldolase C OS=Homo sapiens GN=ALDOC PE=1 SV=2	ALDOC	ALDOC	230	9	7409.61	7980.54	8663.51	9159.25	9964.39	10475	11599.5	9849.11	12641.2	11454.6	1.24623e-07	1.50977e-07	1.1596e-07	8.304e-08	2.29371e-07	1.82806e-07	4.02964e-07	1.63429e-07	5.69647e-07	2.9622e-07	5	5	8635.46	11203.9	996.598	1078.42	0.116022	0.0968285	3.93397	4.04775	0.0502193	0.041954	0.377987	1.53434	4.07189	0.00575043	0	1	0	0	0	0
sp|Q01433-3|AMPD2_HUMAN	Q01433-3	sp|Q01433-3|AMPD2_HUMAN	>sp|Q01433-3|AMPD2_HUMAN Isoform of Q01433, Isoform Ex1A-3 of AMP deaminase 2 OS=Homo sapiens GN=AMPD2	AMPD2	AMPD2	271	3	410.129	467.462	473.515	468.139	421.379	535.219	540.224	531.363	521.783	472.243	0.000309189	5.67849e-06	1.17523e-07	2.02696e-06	7.26312e-07	4.86009e-08	6.08922e-09	1.15063e-06	2.69748e-07	2.34165e-08	5	5	448.125	520.166	29.909	27.6293	0.0678121	0.0549133	2.65061	2.71563	0.0294167	0.0238306	0.215993	1.52774	3.41693	0.0146333	0	1	0	0	0	0
sp|Q01432-6|AMPD3_HUMAN	Q01432-6	sp|Q01432-6|AMPD3_HUMAN	>sp|Q01432-6|AMPD3_HUMAN Isoform of Q01432, Isoform 4 of AMP deaminase 3 OS=Homo sapiens GN=AMPD3	AMPD3	AMPD3	272	1	48.2216	54.1262	29.3991	47.7117	36.5435	55.935	92.4242	79.9004	109.277	62.5071	0.000119419	3.23208e-05	0.102118	0.00143295	0.0346392	1.6375e-07	1.7146e-08	7.7363e-06	1.2473e-08	6.67506e-09	5	5	43.2004	80.0088	9.9966	21.7754	0.251946	0.280309	1.62528	1.8901	0.10774	0.119442	0.879685	1.50454	4.21089	0.00472118	1	1	0	0	0	0
sp|P49418|AMPH_HUMAN	P49418	sp|P49418|AMPH_HUMAN	>sp|P49418|AMPH_HUMAN Amphiphysin OS=Homo sapiens GN=AMPH PE=1 SV=1	AMPH	AMPH	273	9	6824.39	7492.52	7647.72	7589	7196.15	6311.02	6634.4	6400.82	6347.79	5385.19	1.37662e-08	1.86604e-08	2.8459e-09	9.88672e-09	1.92592e-08	3.4895e-08	3.67495e-09	4.80826e-09	1.08485e-08	2.54384e-09	5	5	7349.96	6215.85	341.324	481.108	0.0472447	0.0812567	3.8659	3.79239	0.0205067	0.0352313	-0.244193	-1.55332	-3.69542	0.00963751	0	0	0	0	1	0
sp|P16157-2|ANK1_HUMAN	P16157-2	sp|P16157-2|ANK1_HUMAN	>sp|P16157-2|ANK1_HUMAN Isoform of P16157, Isoform Er16 of Ankyrin-1 OS=Homo sapiens GN=ANK1	ANK1	ANK1	286	3	413.728	399.734	443.554	345.189	413.471	436.768	428.066	514.392	468.834	480.421	4.17157e-05	1.23386e-06	7.25102e-06	0.000118653	1.98397e-07	1.42223e-05	1.21612e-07	2.36168e-08	3.93494e-08	5.63297e-07	5	5	403.135	465.696	36.1319	34.8238	0.0931239	0.0744196	2.60399	2.66714	0.0403559	0.0322754	0.209788	1.31836	2.70778	0.0406803	0	1	0	0	0	0
sp|Q01484|ANK2_HUMAN;sp|Q01484-5|ANK2_HUMAN;tr|H0Y931|H0Y931_HUMAN	Q01484;Q01484-5;H0Y931	sp|Q01484|ANK2_HUMAN;sp|Q01484-5|ANK2_HUMAN;tr|H0Y931|H0Y931_HUMAN	>sp|Q01484|ANK2_HUMAN Ankyrin-2 OS=Homo sapiens GN=ANK2 PE=1 SV=4;>sp|Q01484-5|ANK2_HUMAN Isoform of Q01484, Isoform 4 of Ankyrin-2 OS=Homo sapiens GN=ANK2;>tr|H0Y931|H0Y931_HUMAN Isoform of Q01484, Ankyrin-2 (Fragment) OS=Homo sapiens GN=ANK2 PE=1 SV=1	ANK2	ANK2	287	29	18812.9	18756.3	16853	17839	17426.9	14478.4	15013.2	14781	14773.8	15521.6	3.32364e-08	5.77674e-08	1.74702e-09	1.92835e-08	4.5191e-08	1.44416e-07	5.9727e-09	1.45014e-08	5.05868e-09	1.13665e-08	5	5	17937.6	14913.6	849.019	389.287	0.047494	0.0259202	4.25337	4.17347	0.0206148	0.0112551	-0.265451	-1.77843	-5.2405	0.00125597	-1	0	0	0	0	0
sp|Q12955|ANK3_HUMAN;sp|Q12955-5|ANK3_HUMAN;tr|A0A087WTF3|A0A087WTF3_HUMAN	Q12955;Q12955-5;A0A087WTF3	sp|Q12955|ANK3_HUMAN;sp|Q12955-5|ANK3_HUMAN;tr|A0A087WTF3|A0A087WTF3_HUMAN	>sp|Q12955|ANK3_HUMAN Ankyrin-3 OS=Homo sapiens GN=ANK3 PE=1 SV=3;>sp|Q12955-5|ANK3_HUMAN Isoform of Q12955, Isoform 3 of Ankyrin-3 OS=Homo sapiens GN=ANK3;>tr|A0A087WTF3|A0A087WTF3_HUMAN Isoform of Q12955, Ankyrin-3 (Fragment) OS=Homo sapiens GN=ANK3 PE=1 SV=1	ANK3	ANK3	288	13	4092.15	3764.63	3657.07	3583.72	3482.23	2696.63	2639.31	3021.26	2981.18	3045.04	5.73084e-09	1.07235e-08	4.40376e-10	1.94999e-08	4.16006e-08	7.19583e-08	2.00933e-08	6.58604e-08	5.09609e-08	1.22146e-08	5	5	3715.96	2876.69	234.239	192.957	0.0617949	0.0680676	3.5694	3.4581	0.0268116	0.0295272	-0.369741	-1.72813	-5.67069	0.000776228	-1	0	0	0	0	0
sp|Q7Z6G8-3|ANS1B_HUMAN;sp|Q7Z6G8|ANS1B_HUMAN	Q7Z6G8-3;Q7Z6G8	sp|Q7Z6G8-3|ANS1B_HUMAN;sp|Q7Z6G8|ANS1B_HUMAN	>sp|Q7Z6G8-3|ANS1B_HUMAN Isoform of Q7Z6G8, Isoform 3 of Ankyrin repeat and sterile alpha motif domain-containing protein 1B OS=Homo sapiens GN=ANKS1B;>sp|Q7Z6G8|ANS1B_HUMAN Ankyrin repeat and sterile alpha motif domain-containing protein 1B OS=Homo sapiens GN=ANKS1B PE=1 SV=2	ANKS1B	ANKS1B	56899	8	5355.54	5703.6	5905.02	5647.38	6325.92	4507.08	4511.65	4828.22	5147.39	4805.92	8.43401e-09	2.39106e-08	7.6321e-10	1.27531e-08	8.95891e-09	1.31909e-08	2.70411e-08	1.38247e-08	3.96377e-09	4.59509e-08	5	5	5787.49	4760.05	359.503	265.745	0.0615732	0.055408	3.76183	3.67708	0.0267156	0.0240449	-0.281542	-1.67199	-4.58744	0.00283425	-1	0	0	0	0	0
tr|D6RA82|D6RA82_HUMAN	D6RA82	tr|D6RA82|D6RA82_HUMAN	>tr|D6RA82|D6RA82_HUMAN Isoform of P12429, Annexin OS=Homo sapiens GN=ANXA3 PE=1 SV=1	ANXA3	ANXA3	306	1	298.654	398.924	310.512	298.788	259.989	296.228	328.228	319.53	279.614	354.98	5.56781e-09	4.40086e-09	1.04628e-09	2.07045e-08	1.5279e-09	8.87448e-08	1.44894e-08	7.70964e-08	8.40733e-10	7.65991e-08	5	5	313.374	315.716	51.4935	29.1371	0.156921	0.0925852	2.49169	2.49782	0.0677358	0.0401235	0.0203434	0.116461	0.187875	0.894512	0	1	0	0	0	0
tr|Q6P452|Q6P452_HUMAN	Q6P452	tr|Q6P452|Q6P452_HUMAN	>tr|Q6P452|Q6P452_HUMAN Isoform of P09525, Annexin OS=Homo sapiens GN=ANXA4 PE=1 SV=1	ANXA4	ANXA4	307	1	299.437	329.171	270.326	240.586	218.307	204.325	346.237	340.808	361.386	405.105	6.18264e-06	7.49619e-07	2.0531e-06	3.49352e-05	1.63733e-06	1.34461e-05	5.50821e-10	8.25152e-07	2.32483e-08	2.28561e-07	5	5	271.565	331.572	44.4214	75.4788	0.165681	0.269932	2.42919	2.50955	0.0714678	0.115175	0.266943	0.805214	1.50467	0.226375	0	1	0	0	0	0
sp|P08758|ANXA5_HUMAN	P08758	sp|P08758|ANXA5_HUMAN	>sp|P08758|ANXA5_HUMAN Annexin A5 OS=Homo sapiens GN=ANXA5 PE=1 SV=2	ANXA5	ANXA5	308	3	1125.96	1293.86	1191.86	1460	1385.69	1032.42	1082.62	1251.92	1190.53	1151.84	3.61692e-08	7.67306e-08	5.48792e-10	1.10491e-07	4.08064e-08	9.55702e-08	6.2724e-09	6.06047e-08	9.12539e-08	1.24999e-08	5	5	1291.48	1141.87	136.565	86.7	0.10655	0.0763472	3.10913	3.05661	0.0461437	0.033109	-0.174477	-1.11984	-2.09999	0.0985764	0	0	0	0	0	0
sp|P08133|ANXA6_HUMAN;tr|E5RK69|E5RK69_HUMAN	P08133;E5RK69	sp|P08133|ANXA6_HUMAN;tr|E5RK69|E5RK69_HUMAN	>sp|P08133|ANXA6_HUMAN Annexin A6 OS=Homo sapiens GN=ANXA6 PE=1 SV=3;>tr|E5RK69|E5RK69_HUMAN Isoform of P08133, Annexin OS=Homo sapiens GN=ANXA6 PE=1 SV=1	ANXA6	ANXA6	309	5	4646.1	4684.2	4050.79	4339.73	4023.52	3832.03	3934.01	4072.09	4118.91	4290.58	1.51464e-08	1.86593e-08	8.76862e-10	9.66921e-09	7.97597e-08	6.27114e-08	1.83964e-09	8.67863e-09	3.02841e-09	1.3977e-08	5	5	4348.87	4049.53	314.477	176.125	0.0724809	0.0434522	3.63747	3.60708	0.0314368	0.0188622	-0.100954	-1.03999	-1.62678	0.192108	0	0	0	0	0	0
sp|P20073-2|ANXA7_HUMAN	P20073-2	sp|P20073-2|ANXA7_HUMAN	>sp|P20073-2|ANXA7_HUMAN Isoform of P20073, Isoform 2 of Annexin A7 OS=Homo sapiens GN=ANXA7	ANXA7	ANXA7	310	3	1503.54	1628.26	1398.57	1316.17	1465.7	884.2	872.101	964.634	860.128	817.568	3.20022e-08	2.09817e-08	9.15979e-11	1.3211e-08	6.27759e-09	7.12199e-09	2.13856e-09	3.47996e-09	1.64106e-09	6.37184e-09	5	5	1462.45	879.726	116.908	53.7011	0.0797754	0.0601737	3.16398	2.94371	0.0345911	0.0261095	-0.731695	-1.8412	-10.6528	1.14738e-05	-1	0	0	0	0	0
sp|P50995-2|ANX11_HUMAN	P50995-2	sp|P50995-2|ANX11_HUMAN	>sp|P50995-2|ANX11_HUMAN Isoform of P50995, Isoform 2 of Annexin A11 OS=Homo sapiens GN=ANXA11	ANXA11	ANXA11	311	2	250.89	313.214	211.659	192.716	268.735	312.432	358.851	325.007	334.519	335.273	5.6297e-06	1.37673e-06	7.59418e-07	2.36411e-05	5.49806e-06	9.92901e-07	4.0308e-07	1.50309e-06	4.02084e-07	8.94341e-08	5	5	247.443	333.216	47.6092	17.0474	0.194377	0.0508047	2.38704	2.52228	0.0836355	0.02205	0.449243	1.47509	3.82334	0.00804725	0	1	0	0	0	0
sp|Q10567-3|AP1B1_HUMAN	Q10567-3	sp|Q10567-3|AP1B1_HUMAN	>sp|Q10567-3|AP1B1_HUMAN Isoform of Q10567, Isoform C of AP-1 complex subunit beta-1 OS=Homo sapiens GN=AP1B1	AP1B1	AP1B1	162	4	1974.28	2120.65	2399.81	2095.6	2184.42	1383.1	1381.65	1407.15	1470.3	1233.33	2.1696e-08	2.04114e-08	1.87011e-09	6.8075e-09	1.47566e-08	1.0163e-07	1.04673e-07	4.27553e-07	1.0919e-06	3.11546e-07	5	5	2154.95	1375.11	156.659	87.029	0.0715951	0.0650569	3.33254	3.13762	0.0310536	0.028224	-0.647525	-1.8307	-9.62347	2.20992e-05	-1	0	0	0	0	0
sp|Q9BXS5|AP1M1_HUMAN	Q9BXS5	sp|Q9BXS5|AP1M1_HUMAN	>sp|Q9BXS5|AP1M1_HUMAN AP-1 complex subunit mu-1 OS=Homo sapiens GN=AP1M1 PE=1 SV=3	AP1M1	AP1M1	8907	4	646.324	717.466	744.804	721.116	728.493	695.273	720.632	666.332	720.214	688.326	1.8329e-07	6.58949e-08	1.69385e-09	2.07066e-07	5.26026e-08	5.55988e-08	6.92056e-09	1.36887e-08	2.0894e-08	5.47559e-06	5	5	711.641	698.155	37.9926	22.9642	0.0550986	0.0330448	2.85174	2.84376	0.0239109	0.0143473	-0.0265154	-0.418778	-0.489661	0.708824	0	0	0	0	0	0
sp|P61966|AP1S1_HUMAN	P61966	sp|P61966|AP1S1_HUMAN	>sp|P61966|AP1S1_HUMAN AP-1 complex subunit sigma-1A OS=Homo sapiens GN=AP1S1 PE=1 SV=1	AP1S1	AP1S1	1174	1	202.691	192.02	196.776	193.479	178.071	176.902	175.201	174.455	190.921	171.587	1.31693e-08	2.86846e-08	1.43025e-10	9.25571e-08	9.63843e-09	1.69734e-08	3.94808e-08	7.04491e-08	3.40687e-07	1.09451e-05	5	5	192.607	177.813	9.10286	7.57466	0.0481037	0.0416581	2.28428	2.24966	0.0208791	0.018084	-0.114997	-1.33542	-2.13229	0.0941363	0	0	0	0	0	0
sp|O95782-2|AP2A1_HUMAN	O95782-2	sp|O95782-2|AP2A1_HUMAN	>sp|O95782-2|AP2A1_HUMAN Isoform of O95782, Isoform B of AP-2 complex subunit alpha-1 OS=Homo sapiens GN=AP2A1	AP2A1	AP2A1	160	20	20306.4	22118.7	21408	20919.5	21059.2	16495.6	15882.5	16376.8	16659.5	15310.5	4.58648e-08	2.00205e-07	4.5423e-09	1.64404e-08	1.11798e-07	4.81985e-08	1.21542e-08	2.4875e-08	2.11039e-08	1.62623e-08	5	5	21162.4	16145	666.566	549.236	0.0314236	0.0344084	4.32539	4.20783	0.0136437	0.014939	-0.390521	-1.85395	-8.08179	7.4694e-05	-1	0	0	0	1	0
sp|O94973-2|AP2A2_HUMAN;sp|O94973|AP2A2_HUMAN	O94973-2;O94973	sp|O94973-2|AP2A2_HUMAN;sp|O94973|AP2A2_HUMAN	>sp|O94973-2|AP2A2_HUMAN Isoform of O94973, Isoform 2 of AP-2 complex subunit alpha-2 OS=Homo sapiens GN=AP2A2;>sp|O94973|AP2A2_HUMAN AP-2 complex subunit alpha-2 OS=Homo sapiens GN=AP2A2 PE=1 SV=2	AP2A2	AP2A2	161	17	13813.9	14797.4	14688.6	14832.3	14270.5	13841.6	13371.9	13338.3	13218.9	12011.5	2.8557e-08	8.40164e-08	3.05432e-09	3.93852e-08	4.52125e-08	2.96735e-08	6.5067e-09	3.13673e-08	8.59288e-09	1.59662e-08	5	5	14480.6	13156.4	434.738	682.579	0.0303484	0.0532707	4.16063	4.11865	0.0131771	0.0231188	-0.139431	-1.48019	-2.62582	0.0458195	0	0	0	0	1	0
sp|P63010|AP2B1_HUMAN	P63010	sp|P63010|AP2B1_HUMAN	>sp|P63010|AP2B1_HUMAN AP-2 complex subunit beta OS=Homo sapiens GN=AP2B1 PE=1 SV=1	AP2B1	AP2B1	163	16	12077.4	13624.3	14828.6	12917.2	14794.2	11958	12441.4	12624.5	12925.9	10737.1	2.2357e-07	1.83907e-07	4.40161e-09	4.06817e-08	2.85609e-07	4.74899e-08	8.45205e-09	2.77558e-08	2.98254e-08	1.66267e-08	5	5	13648.4	12137.4	1194.66	857.96	0.0886556	0.0731537	4.13373	4.08322	0.0384273	0.0317279	-0.167797	-1.18649	-2.22267	0.0830652	0	0	0	0	1	0
sp|Q96CW1-2|AP2M1_HUMAN	Q96CW1-2	sp|Q96CW1-2|AP2M1_HUMAN	>sp|Q96CW1-2|AP2M1_HUMAN Isoform of Q96CW1, Isoform 2 of AP-2 complex subunit mu OS=Homo sapiens GN=AP2M1	AP2M1	AP2M1	1173	10	7397.15	7995.24	8107.7	7923.58	8640.44	7037.29	7467.8	7800.22	7630.18	6544.94	8.48432e-09	5.47216e-08	5.3943e-10	3.92787e-09	4.4468e-08	5.37129e-09	5.1909e-09	1.4007e-08	5.22688e-09	9.27931e-09	5	5	8012.82	7296.09	444.473	506.57	0.0555848	0.0709737	3.90325	3.86223	0.0241215	0.0307848	-0.136269	-1.21111	-2.11477	0.0964273	0	0	0	0	1	0
sp|P53680|AP2S1_HUMAN	P53680	sp|P53680|AP2S1_HUMAN	>sp|P53680|AP2S1_HUMAN AP-2 complex subunit sigma OS=Homo sapiens GN=AP2S1 PE=1 SV=2	AP2S1	AP2S1	1175	6	5197.28	4514.89	4760.91	4651.52	5050.68	2311.06	2496.53	3609.78	3031.24	1895.65	2.75429e-08	1.53542e-06	1.28832e-08	2.16441e-06	2.09004e-07	2.41288e-06	8.20558e-09	1.14782e-07	1.38734e-08	2.15541e-06	5	5	4835.06	2668.85	282.572	665.625	0.0582377	0.252152	3.68381	3.4156	0.0252709	0.107825	-0.890976	-1.68179	-6.06707	0.000493275	-1	0	0	0	1	0
sp|Q13367|AP3B2_HUMAN	Q13367	sp|Q13367|AP3B2_HUMAN	>sp|Q13367|AP3B2_HUMAN AP-3 complex subunit beta-2 OS=Homo sapiens GN=AP3B2 PE=1 SV=2	AP3B2	AP3B2	8120	11	2799.24	2658.91	2869.02	2757.93	2851.15	2878.27	2616.35	2918.51	2841.09	2730.56	1.84828e-08	3.989e-08	3.70515e-10	4.91027e-09	1.30846e-08	4.28434e-08	4.21712e-09	1.14779e-08	1.503e-08	4.80079e-09	5	5	2787.25	2796.96	84.0314	122.844	0.0304278	0.0444802	3.44502	3.44635	0.0132116	0.0193079	0.00441606	0.0851468	0.0873002	0.95107	0	1	0	0	0	0
sp|O14617|AP3D1_HUMAN	O14617	sp|O14617|AP3D1_HUMAN	>sp|O14617|AP3D1_HUMAN AP-3 complex subunit delta-1 OS=Homo sapiens GN=AP3D1 PE=1 SV=1	AP3D1	AP3D1	8943	12	2126.34	1991.69	2123.55	1972.7	2140.73	2112.05	2188.09	2318.12	2193.27	2055.72	1.72195e-06	5.50702e-07	4.47909e-08	4.7581e-06	6.21051e-08	1.0709e-07	6.4493e-08	7.2637e-08	6.738e-08	4.16523e-07	5	5	2071	2173.45	81.6061	98.953	0.0397245	0.0452979	3.31591	3.33679	0.0172453	0.0196625	0.0693746	1.01283	1.31564	0.288071	0	1	0	0	0	0
sp|P53677|AP3M2_HUMAN	P53677	sp|P53677|AP3M2_HUMAN	>sp|P53677|AP3M2_HUMAN AP-3 complex subunit mu-2 OS=Homo sapiens GN=AP3M2 PE=2 SV=1	AP3M2	AP3M2	10947	3	656.725	635.613	659.394	620.525	579.237	663.593	641.2	675.901	574.919	639.082	1.69373e-08	1.15967e-06	1.99955e-08	4.64268e-06	1.34428e-06	1.52788e-09	1.91986e-09	2.57977e-08	9.96106e-08	9.39636e-09	5	5	630.299	638.939	32.6952	38.9801	0.052879	0.0627994	2.79907	2.80479	0.022949	0.0272466	0.0190053	0.238982	0.311207	0.817086	0	1	0	0	0	0
tr|F5H459|F5H459_HUMAN;sp|Q92572|AP3S1_HUMAN	F5H459;Q92572	tr|F5H459|F5H459_HUMAN;sp|Q92572|AP3S1_HUMAN	>tr|F5H459|F5H459_HUMAN Isoform of Q92572, AP-3 complex subunit sigma-1 OS=Homo sapiens GN=AP3S1 PE=1 SV=1;>sp|Q92572|AP3S1_HUMAN AP-3 complex subunit sigma-1 OS=Homo sapiens GN=AP3S1 PE=1 SV=1	AP3S1	AP3S1	1176	1	93.7947	106.36	108.844	106.5	58.7722	90.5795	106.205	104.016	93.7071	90.8315	0.000162314	5.10978e-05	2.32996e-06	2.99057e-05	5.17284e-05	0.000178524	1.46661e-05	4.28246e-06	0.000263032	8.09582e-06	5	5	94.8543	97.0679	21.0165	7.48425	0.265124	0.0764049	1.96646	1.98606	0.113192	0.033134	0.0651107	0.247154	0.418242	0.750355	0	1	0	0	0	0
sp|P59780|AP3S2_HUMAN	P59780	sp|P59780|AP3S2_HUMAN	>sp|P59780|AP3S2_HUMAN AP-3 complex subunit sigma-2 OS=Homo sapiens GN=AP3S2 PE=2 SV=1	AP3S2	AP3S2	10239	1	206.547	177.406	212.81	202.183	193.071	270.377	285.006	243.916	252.208	267.343	3.13257e-08	1.82743e-06	2.98826e-06	5.04203e-07	1.32081e-08	4.72958e-08	3.68904e-06	2.1848e-06	2.0343e-09	1.4559e-06	5	5	198.404	263.77	13.7612	16.0876	0.0710177	0.0611113	2.29669	2.42058	0.0308038	0.0265156	0.411552	1.75246	6.23947	0.000416446	1	1	0	0	0	0
sp|O00213-2|APBB1_HUMAN	O00213-2	sp|O00213-2|APBB1_HUMAN	>sp|O00213-2|APBB1_HUMAN Isoform of O00213, Isoform 2 of Amyloid beta A4 precursor protein-binding family B member 1 OS=Homo sapiens GN=APBB1	APBB1	APBB1	322	1	72.0158	78.2842	75.6551	88.4961	510.766	89.7631	85.6501	80.7411	89.3775	98.3069	1.02856e-06	5.61975e-05	7.82852e-07	9.95754e-09	0.00786939	5.5666e-08	5.64219e-08	3.27334e-07	1.18507e-06	2.24511e-07	5	5	165.043	88.7677	193.362	6.45181	1.01526	0.0722541	2.05702	1.94735	0.365532	0.0313387	-0.364318	-0.43638	-0.776724	0.540485	0	0	0	0	0	0
sp|Q9HDC9|APMAP_HUMAN	Q9HDC9	sp|Q9HDC9|APMAP_HUMAN	>sp|Q9HDC9|APMAP_HUMAN Adipocyte plasma membrane-associated protein OS=Homo sapiens GN=APMAP PE=1 SV=2	APMAP	APMAP	57136	1	401.15	376.424	369.277	341.148	323.299	262.887	222.273	191.367	173.93	264.916	3.45641e-06	6.72486e-06	8.03108e-08	1.29614e-07	4.30481e-08	0.000293961	0.000781303	0.0015359	0.00335538	0.000520023	5	5	362.259	223.075	30.5206	41.1004	0.0849309	0.189414	2.55778	2.3424	0.0368188	0.0815375	-0.715461	-1.67962	-5.91018	0.000581299	-1	0	0	0	0	0
sp|Q8NCW5-2|NNRE_HUMAN	Q8NCW5-2	sp|Q8NCW5-2|NNRE_HUMAN	>sp|Q8NCW5-2|NNRE_HUMAN Isoform of Q8NCW5, Isoform 2 of NAD(P)H-hydrate epimerase OS=Homo sapiens GN=APOA1BP	APOA1BP	APOA1BP	128240	1	141.278	194.545	179.94	253.2	110.933	100.718	37.0311	135.954	36.4973	46.5994	6.17123e-06	4.27633e-05	0.000591736	6.28437e-06	8.41416e-05	0.526714	0.352321	0.456354	0.01683	0.340965	5	5	175.979	71.3599	54.2187	44.8364	0.322807	0.668894	2.22855	1.78714	0.136734	0.264093	-1.46633	-1.4441	-3.84898	0.00776924	0	0	0	0	0	0
sp|P02649|APOE_HUMAN	P02649	sp|P02649|APOE_HUMAN	>sp|P02649|APOE_HUMAN Apolipoprotein E OS=Homo sapiens GN=APOE PE=1 SV=1	APOE	APOE	348	1	242.285	181.117	209.581	190.875	241.981	300.897	324.057	330.688	369.935	330.83	3.26707e-07	1.82404e-05	7.23177e-06	1.06063e-06	3.20209e-06	6.74928e-08	2.42743e-09	2.05617e-07	3.81587e-08	1.43293e-08	5	5	213.168	331.282	28.3511	24.85	0.134062	0.0740959	2.32563	2.51924	0.0579632	0.0321354	0.643139	1.74115	6.85743	0.000217355	1	1	0	0	0	0
tr|H7C1U8|H7C1U8_HUMAN	H7C1U8	tr|H7C1U8|H7C1U8_HUMAN	>tr|H7C1U8|H7C1U8_HUMAN Isoform of Q9BUR5, MICOS complex subunit MIC26 (Fragment) OS=Homo sapiens GN=APOO PE=1 SV=1	APOO	APOO	79135	1	974.023	757.586	866.469	753.959	983.018	983.627	969.69	1076.16	1110.21	950.304	3.48462e-07	6.00599e-06	2.31507e-08	2.91537e-05	1.20903e-05	2.11645e-07	2.66476e-08	4.32359e-08	5.29616e-08	3.43538e-08	5	5	867.011	1018	111.427	70.6814	0.129784	0.0687581	2.93513	3.00692	0.0561294	0.0298261	0.238477	1.26371	2.62961	0.0456048	0	1	0	0	0	0
sp|Q9UKG1|DP13A_HUMAN	Q9UKG1	sp|Q9UKG1|DP13A_HUMAN	>sp|Q9UKG1|DP13A_HUMAN DCC-interacting protein 13-alpha OS=Homo sapiens GN=APPL1 PE=1 SV=1	APPL1	APPL1	26060	4	344.316	289.881	350.311	280.388	348.587	389.934	385.916	350.605	393.697	340.557	0.000177468	4.1978e-06	1.29489e-06	0.000364514	9.43971e-06	9.43828e-07	7.18109e-05	5.11838e-05	5.69095e-06	1.4157e-05	5	5	322.697	372.142	34.5224	24.6597	0.109924	0.0673016	2.50674	2.56993	0.0475961	0.0291957	0.209915	1.26511	2.5591	0.0506551	0	1	0	0	0	0
sp|P07741-2|APT_HUMAN	P07741-2	sp|P07741-2|APT_HUMAN	>sp|P07741-2|APT_HUMAN Isoform of P07741, Isoform 2 of Adenine phosphoribosyltransferase OS=Homo sapiens GN=APRT	APRT	APRT	353	1	108.761	177.777	161.45	117.876	146.3	344.191	290.513	311.175	313.862	364.694	2.26811e-06	5.67898e-06	1.77066e-09	1.55102e-07	1.10315e-07	9.15762e-10	7.78604e-10	2.47934e-09	2.36997e-08	5.2722e-10	5	5	142.433	324.887	28.9943	29.3613	0.210028	0.0898957	2.14621	2.51033	0.0902314	0.0389627	1.20957	1.79559	9.18545	2.9954e-05	1	1	0	0	0	0
sp|Q7LC44|ARC_HUMAN	Q7LC44	sp|Q7LC44|ARC_HUMAN	>sp|Q7LC44|ARC_HUMAN Activity-regulated cytoskeleton-associated protein OS=Homo sapiens GN=ARC PE=2 SV=1	ARC	ARC	23237	2	185.728	167.791	195.347	177.235	117.433	112.537	87.021	109.884	101.854	125.684	3.16404e-07	1.37494e-05	7.0313e-05	6.46574e-06	6.53509e-06	0.00119652	0.017898	0.000282645	2.50094e-06	0.0327626	5	5	168.707	107.396	30.4223	14.2559	0.204139	0.136866	2.22056	2.02782	0.0877533	0.0591645	-0.640257	-1.55834	-4.54545	0.00299546	-1	0	0	0	0	0
sp|P84077|ARF1_HUMAN	P84077	sp|P84077|ARF1_HUMAN	>sp|P84077|ARF1_HUMAN ADP-ribosylation factor 1 OS=Homo sapiens GN=ARF1 PE=1 SV=2	ARF1	ARF1	375	5	2412.28	1016.84	1085.41	1221.86	794.858	694.026	741.259	1079.87	831.064	564.725	5.42641e-08	7.97236e-08	2.64166e-09	8.03235e-09	2.46579e-08	3.76963e-07	1.96406e-08	6.52119e-08	1.9126e-07	3.57975e-05	5	5	1306.25	782.189	637.277	192.186	0.435532	0.242352	3.08252	2.88324	0.180998	0.103754	-0.66199	-1.1434	-2.4624	0.0584257	0	0	0	0	0	0
sp|P62330|ARF6_HUMAN	P62330	sp|P62330|ARF6_HUMAN	>sp|P62330|ARF6_HUMAN ADP-ribosylation factor 6 OS=Homo sapiens GN=ARF6 PE=1 SV=2	ARF6	ARF6	382	4	833.501	874.482	918.348	882.242	924.86	790.126	726.106	786.815	787.04	757.187	1.02037e-07	2.62767e-07	2.19201e-07	7.56154e-06	1.05448e-07	6.6525e-07	1.75685e-08	9.50929e-09	1.57784e-06	3.7336e-09	5	5	886.687	769.455	36.9358	27.6925	0.0419967	0.0365171	2.94747	2.88595	0.0182309	0.0158539	-0.204338	-1.69921	-3.99374	0.00639026	0	0	0	0	0	0
sp|Q8N6T3-5|ARFG1_HUMAN	Q8N6T3-5	sp|Q8N6T3-5|ARFG1_HUMAN	>sp|Q8N6T3-5|ARFG1_HUMAN Isoform of Q8N6T3, Isoform 5 of ADP-ribosylation factor GTPase-activating protein 1 OS=Homo sapiens GN=ARFGAP1	ARFGAP1	ARFGAP1	55738	1	356.942	383.343	377.303	339.638	338.697	309.787	287.389	275.462	250.505	261.026	5.16296e-06	3.27446e-06	5.6689e-07	1.29504e-06	1.75464e-05	1.13218e-06	1.26135e-06	2.78747e-06	1.58522e-06	7.78921e-06	5	5	359.185	276.834	20.7288	23.1426	0.0576448	0.0830291	2.55474	2.44102	0.0250141	0.0359971	-0.377774	-1.70545	-5.45959	0.000991787	-1	0	0	0	0	0
sp|Q9Y6D5|BIG2_HUMAN	Q9Y6D5	sp|Q9Y6D5|BIG2_HUMAN	>sp|Q9Y6D5|BIG2_HUMAN Brefeldin A-inhibited guanine nucleotide-exchange protein 2 OS=Homo sapiens GN=ARFGEF2 PE=1 SV=3	ARFGEF2	ARFGEF2	10564	2	173.443	119.83	142.902	149.607	163.747	1264.45	1238.97	1196.36	1757.03	1494.94	4.38705e-06	0.000611329	1.01532e-06	9.66724e-07	2.84501e-06	0.00026934	0.000117852	0.0111232	0.0759703	0.000600471	5	5	149.906	1390.35	20.6112	235.472	0.1432	0.162572	2.17238	3.13845	0.0618757	0.0701443	3.20921	1.8833	25.4806	1.49219e-08	1	1	0	0	0	0
sp|P53365-2|ARFP2_HUMAN	P53365-2	sp|P53365-2|ARFP2_HUMAN	>sp|P53365-2|ARFP2_HUMAN Isoform of P53365, Isoform 2 of Arfaptin-2 OS=Homo sapiens GN=ARFIP2	ARFIP2	ARFIP2	23647	2	341.008	343.685	301.69	346.349	328.455	251.938	217.546	259.378	234.696	204.744	1.5389e-07	1.16593e-06	3.11549e-06	1.45077e-07	4.88538e-06	8.08943e-08	7.31582e-06	2.75313e-06	2.56754e-07	2.19772e-06	5	5	332.237	233.66	18.4022	22.8711	0.0570166	0.0990829	2.52089	2.3669	0.0247419	0.0429261	-0.511564	-1.75741	-6.80395	0.00022882	-1	0	0	0	0	0
sp|Q07960|RHG01_HUMAN	Q07960	sp|Q07960|RHG01_HUMAN	>sp|Q07960|RHG01_HUMAN Rho GTPase-activating protein 1 OS=Homo sapiens GN=ARHGAP1 PE=1 SV=1	ARHGAP1	ARHGAP1	392	4	1216.36	1130.27	1269.3	1300.57	1291.81	997.63	917.53	1119.51	942.411	711.521	7.67568e-08	8.88467e-06	2.27147e-08	6.68246e-07	2.14995e-07	0.000214004	1.86938e-05	8.56477e-07	2.24924e-06	0.188417	5	5	1241.66	937.721	70.3528	148.521	0.0580389	0.16802	3.09343	2.96741	0.0251848	0.0724629	-0.418626	-1.50332	-3.95256	0.00674859	0	0	0	0	0	0
tr|A0A0A0MSK6|A0A0A0MSK6_HUMAN	A0A0A0MSK6	tr|A0A0A0MSK6|A0A0A0MSK6_HUMAN	>tr|A0A0A0MSK6|A0A0A0MSK6_HUMAN Isoform of Q13017, Rho GTPase-activating protein 5 OS=Homo sapiens GN=ARHGAP5 PE=1 SV=1	ARHGAP5	ARHGAP5	394	1	73.0763	73.2536	72.5967	74.7939	63.5566	85.093	87.2103	89.9072	69.3212	84.4505	0.000715027	1.53628e-05	0.000153977	0.00059457	0.00112318	6.2189e-06	2.01756e-06	0.000363837	8.01797e-05	3.35853e-06	5	5	71.4554	83.1964	4.49168	8.04424	0.0655792	0.102957	1.85331	1.91834	0.0284501	0.0445958	0.216042	1.32243	2.74153	0.0387951	0	1	0	0	0	0
sp|Q5T5U3|RHG21_HUMAN	Q5T5U3	sp|Q5T5U3|RHG21_HUMAN	>sp|Q5T5U3|RHG21_HUMAN Rho GTPase-activating protein 21 OS=Homo sapiens GN=ARHGAP21 PE=1 SV=1	ARHGAP21	ARHGAP21	57584	6	558.958	597.523	518.59	544.556	532.049	688.907	655.456	664.493	627.432	733.743	1.05452e-06	1.303e-05	0.000254487	6.98863e-05	0.000283546	5.26021e-08	1.51456e-07	3.1841e-06	1.14051e-05	3.91164e-06	5	5	550.335	674.006	30.3173	39.982	0.0543204	0.0587614	2.74011	2.82806	0.0235737	0.0254978	0.292165	1.69745	4.85126	0.00202635	1	1	0	0	0	0
sp|A7KAX9|RHG32_HUMAN	A7KAX9	sp|A7KAX9|RHG32_HUMAN	>sp|A7KAX9|RHG32_HUMAN Rho GTPase-activating protein 32 OS=Homo sapiens GN=ARHGAP32 PE=1 SV=1	ARHGAP32	ARHGAP32	9743	2	147.734	127.439	139.422	134.006	153.313	97.1384	97.6286	108.44	113.199	106.005	3.75969e-08	2.68273e-05	8.92655e-08	1.52852e-05	1.82094e-08	1.99571e-05	5.02587e-06	4.53982e-06	2.17283e-06	2.50125e-05	5	5	140.383	104.482	10.3723	6.97984	0.0741106	0.0669921	2.14636	2.01827	0.0321418	0.0290618	-0.42553	-1.74439	-6.19594	0.00043414	-1	0	0	0	0	0
sp|Q9NRY4|RHG35_HUMAN	Q9NRY4	sp|Q9NRY4|RHG35_HUMAN	>sp|Q9NRY4|RHG35_HUMAN Rho GTPase-activating protein 35 OS=Homo sapiens GN=ARHGAP35 PE=1 SV=3	ARHGAP35	ARHGAP35	2909	1	43.3128	81.2173	60.1873	64.6907	55.3714	71.7218	81.4541	68.7758	46.571	97.8909	0.0011475	0.000501514	0.000116655	2.58792e-05	0.00142067	1.61465e-07	1.41359e-06	7.50115e-05	2.9546e-05	4.34026e-06	5	5	60.9559	73.2827	13.8522	18.7656	0.232103	0.279522	1.77598	1.85257	0.0994816	0.119119	0.254434	0.689646	1.26054	0.309107	0	1	0	0	0	0
sp|Q9C0H5|RHG39_HUMAN	Q9C0H5	sp|Q9C0H5|RHG39_HUMAN	>sp|Q9C0H5|RHG39_HUMAN Rho GTPase-activating protein 39 OS=Homo sapiens GN=ARHGAP39 PE=1 SV=2	ARHGAP39	ARHGAP39	80728	4	391.925	409.862	418.403	470.389	330.223	446.996	303.604	520.574	409.993	427.641	5.57552e-06	1.21876e-05	7.07188e-06	8.1115e-06	0.00125648	1.40886e-05	0.000181566	3.01467e-05	3.66037e-05	5.71791e-07	5	5	404.16	421.761	50.5915	78.3182	0.128964	0.199177	2.60374	2.61859	0.0557777	0.0856613	0.0493298	0.216485	0.361503	0.785962	0	1	0	0	0	0
sp|Q17R89-2|RHG44_HUMAN	Q17R89-2	sp|Q17R89-2|RHG44_HUMAN	>sp|Q17R89-2|RHG44_HUMAN Isoform of Q17R89, Isoform 2 of Rho GTPase-activating protein 44 OS=Homo sapiens GN=ARHGAP44	ARHGAP44	ARHGAP44	9912	5	522.132	605.138	568.043	617.064	559.42	733.47	687.482	647.1	618.631	668.172	2.86403e-06	2.88985e-06	2.06692e-07	4.49197e-07	2.4815e-07	4.07311e-08	4.17768e-08	2.09519e-08	1.13209e-08	5.00666e-08	5	5	574.359	670.971	37.9533	43.2896	0.0667044	0.064166	2.75842	2.82599	0.0289372	0.0278383	0.224463	1.51667	3.42847	0.0144141	0	1	0	0	0	0
tr|J3KRE2|J3KRE2_HUMAN	J3KRE2	tr|J3KRE2|J3KRE2_HUMAN	>tr|J3KRE2|J3KRE2_HUMAN Isoform of P52565, Rho GDP-dissociation inhibitor 1 OS=Homo sapiens GN=ARHGDIA PE=1 SV=1	ARHGDIA	ARHGDIA	396	4	2533.9	2144.79	2676.72	2376.95	2316.96	3632.82	3362.27	3201.46	3105.6	3155.18	3.30057e-09	5.17741e-08	5.72743e-10	4.61158e-09	3.98791e-08	1.16819e-07	1.134e-08	1.04792e-08	4.30498e-08	4.75231e-09	5	5	2409.86	3291.47	204.069	213.752	0.085037	0.0635314	3.38074	3.51668	0.0368646	0.0275636	0.45157	1.74412	6.31839	0.000384893	1	1	0	0	0	0
sp|Q92974-3|ARHG2_HUMAN	Q92974-3	sp|Q92974-3|ARHG2_HUMAN	>sp|Q92974-3|ARHG2_HUMAN Isoform of Q92974, Isoform 3 of Rho guanine nucleotide exchange factor 2 OS=Homo sapiens GN=ARHGEF2	ARHGEF2	ARHGEF2	9181	1	72.5008	81.8592	89.6783	77.0271	77.0889	62.2625	76.1819	73.5169	69.819	87.9942	3.46224e-06	0.000110649	5.56907e-06	2.00235e-05	0.000110085	5.1023e-07	8.52775e-08	0.000148284	1.28976e-07	1.92904e-07	5	5	79.6308	73.9549	6.51912	9.43492	0.0804484	0.126849	1.89995	1.86618	0.034882	0.05487	-0.112174	-0.72065	-1.21467	0.326638	0	0	0	0	0	0
sp|Q15052-2|ARHG6_HUMAN	Q15052-2	sp|Q15052-2|ARHG6_HUMAN	>sp|Q15052-2|ARHG6_HUMAN Isoform of Q15052, Isoform 2 of Rho guanine nucleotide exchange factor 6 OS=Homo sapiens GN=ARHGEF6	ARHGEF6	ARHGEF6	9459	1	113.61	151.59	136.8	142.895	121.106	98.9216	104.118	110.578	88.3283	96.9295	1.82788e-08	1.55006e-07	2.27237e-09	1.0619e-05	2.92646e-06	9.52909e-08	4.97899e-06	5.27628e-07	9.40639e-06	7.61163e-08	5	5	133.2	99.775	15.6138	8.29778	0.119357	0.0839694	2.12207	1.99781	0.0516528	0.0364034	-0.412793	-1.59574	-4.57293	0.00288573	-1	0	0	0	0	0
sp|Q14155-5|ARHG7_HUMAN;sp|Q14155-3|ARHG7_HUMAN;tr|B1ALK7|B1ALK7_HUMAN	Q14155-5;Q14155-3;B1ALK7	sp|Q14155-5|ARHG7_HUMAN;sp|Q14155-3|ARHG7_HUMAN;tr|B1ALK7|B1ALK7_HUMAN	>sp|Q14155-5|ARHG7_HUMAN Isoform of Q14155, Isoform 5 of Rho guanine nucleotide exchange factor 7 OS=Homo sapiens GN=ARHGEF7;>sp|Q14155-3|ARHG7_HUMAN Isoform of Q14155, Isoform 3 of Rho guanine nucleotide exchange factor 7 OS=Homo sapiens GN=ARHGEF7;>tr|B1ALK7|B1ALK7_HUMAN Isoform of Q14155, Rho guanine nucleotide exchange factor 7 OS=Homo sapiens GN=ARHGEF7 PE=1 SV=1	ARHGEF7	ARHGEF7	8874	2	225.148	197.533	176.106	209.095	171.888	216.729	190.382	179.493	177.254	199.542	1.09843e-06	1.67147e-05	0.251904	2.20379e-05	1.29212e-05	1.03016e-06	2.23225e-07	3.11994e-05	3.35347e-07	0.00242059	5	5	195.954	192.68	22.3639	16.1444	0.114394	0.0825319	2.28989	2.28364	0.0495193	0.0357823	-0.0207641	-0.152967	-0.236237	0.863136	0	0	0	0	0	0
sp|O43307-3|ARHG9_HUMAN	O43307-3	sp|O43307-3|ARHG9_HUMAN	>sp|O43307-3|ARHG9_HUMAN Isoform of O43307, Isoform 3 of Rho guanine nucleotide exchange factor 9 OS=Homo sapiens GN=ARHGEF9	ARHGEF9	ARHGEF9	23229	1	40.1074	55.5644	41.675	37.8927	49.7944	51.8608	56.1905	52.8314	55.3252	46.2088	4.26884e-07	2.19073e-05	4.78204e-05	0.0038109	2.01008e-05	9.67794e-07	5.31435e-10	2.60912e-07	3.45131e-06	6.41385e-06	5	5	45.0068	52.4833	7.41786	3.92741	0.16141	0.0772672	1.64873	1.71901	0.069649	0.0335068	0.233471	1.10751	2.1904	0.0866131	0	1	0	0	0	0
sp|P36404|ARL2_HUMAN	P36404	sp|P36404|ARL2_HUMAN	>sp|P36404|ARL2_HUMAN ADP-ribosylation factor-like protein 2 OS=Homo sapiens GN=ARL2 PE=1 SV=4	ARL2	ARL2	402	1	59.08	57.6968	68.1397	60.2045	52.5908	86.5498	81.5544	105.261	87.76	80.0654	0.000394942	6.62189e-05	0.00589164	0.00725433	1.44893e-05	5.80028e-08	1.02969e-07	4.52097e-08	1.2121e-07	6.11639e-06	5	5	59.5424	88.2381	5.6191	10.0538	0.0933639	0.108779	1.77331	1.94354	0.0404595	0.0471033	0.565518	1.72284	6.35238	0.000373509	1	1	0	0	0	0
sp|P36405|ARL3_HUMAN	P36405	sp|P36405|ARL3_HUMAN	>sp|P36405|ARL3_HUMAN ADP-ribosylation factor-like protein 3 OS=Homo sapiens GN=ARL3 PE=1 SV=2	ARL3	ARL3	403	3	487.716	456.845	516.594	525.056	471.242	640.043	630.725	653.716	589.812	560.973	8.88998e-08	6.88677e-08	1.25619e-09	4.19112e-08	5.37433e-08	6.07969e-09	5.69937e-10	2.17043e-09	7.55083e-09	5.12305e-09	5	5	491.49	615.054	29.0748	38.4926	0.0592309	0.0636051	2.69091	2.78822	0.0257011	0.0275955	0.323264	1.7037	5.12554	0.00144422	1	1	0	0	0	0
sp|O75915|PRAF3_HUMAN	O75915	sp|O75915|PRAF3_HUMAN	>sp|O75915|PRAF3_HUMAN PRA1 family protein 3 OS=Homo sapiens GN=ARL6IP5 PE=1 SV=1	ARL6IP5	ARL6IP5	10550	1	830.622	906.218	804.51	943.057	760.36	684.745	616.56	676.235	627.744	825.552	2.20408e-08	8.69569e-09	3.50798e-10	1.38345e-08	5.48779e-09	1.30078e-09	3.04444e-09	2.11069e-09	6.44343e-10	3.03125e-09	5	5	848.954	686.167	74.657	83.3476	0.0878881	0.116173	2.92755	2.83403	0.0380959	0.0502844	-0.310665	-1.44334	-3.44614	0.0140127	0	0	0	0	0	0
sp|Q96BM9|ARL8A_HUMAN	Q96BM9	sp|Q96BM9|ARL8A_HUMAN	>sp|Q96BM9|ARL8A_HUMAN ADP-ribosylation factor-like protein 8A OS=Homo sapiens GN=ARL8A PE=1 SV=1	ARL8A	ARL8A	127829	2	1387.89	1282.19	1345.34	1316.85	1273.49	1509.41	1396.11	1688.38	1650.51	1535.48	5.5347e-09	2.27197e-08	3.15355e-10	1.27586e-08	3.00232e-08	2.3778e-08	1.3709e-09	9.25381e-09	2.86049e-09	3.8826e-09	5	5	1321.15	1555.98	47.0288	116.847	0.0354124	0.0758957	3.12073	3.19101	0.0153746	0.0329138	0.233454	1.58803	3.78132	0.00850063	0	1	0	0	0	0
sp|Q9NVJ2|ARL8B_HUMAN	Q9NVJ2	sp|Q9NVJ2|ARL8B_HUMAN	>sp|Q9NVJ2|ARL8B_HUMAN ADP-ribosylation factor-like protein 8B OS=Homo sapiens GN=ARL8B PE=1 SV=1	ARL8B	ARL8B	55207	1	392.068	247.209	289.565	194.045	293.022	276.806	321.841	386.974	337.417	265.756	4.64736e-06	2.45581e-07	4.03589e-07	6.17543e-07	6.33945e-06	2.04615e-05	1.58877e-07	9.23775e-08	2.74294e-07	4.1906e-05	5	5	283.182	317.759	72.8581	48.9266	0.261899	0.153485	2.4406	2.49803	0.11186	0.06627	0.190794	0.625569	1.1186	0.368862	0	1	0	0	0	0
tr|A0A087WUW9|A0A087WUW9_HUMAN	A0A087WUW9	tr|A0A087WUW9|A0A087WUW9_HUMAN	>tr|A0A087WUW9|A0A087WUW9_HUMAN Isoform of Q9NXU5, ADP-ribosylation factor-like protein 15 OS=Homo sapiens GN=ARL15 PE=1 SV=1	ARL15	ARL15	54622	1	337.401	368.118	289.926	339.117	273.29	451.932	490.729	511.228	549.282	522.074	4.72371e-09	3.82455e-08	3.84484e-08	1.59701e-08	3.52052e-08	6.57316e-09	7.82119e-09	1.06157e-08	1.28609e-08	1.14245e-08	5	5	321.57	505.049	38.9153	36.4386	0.123374	0.0733259	2.50468	2.70241	0.0533785	0.0318024	0.656854	1.76319	7.37459	0.000132054	1	1	0	0	0	0
sp|Q9NVT9|ARMC1_HUMAN	Q9NVT9	sp|Q9NVT9|ARMC1_HUMAN	>sp|Q9NVT9|ARMC1_HUMAN Armadillo repeat-containing protein 1 OS=Homo sapiens GN=ARMC1 PE=1 SV=1	ARMC1	ARMC1	55156	2	198.868	233.338	226.104	160.151	243.346	128.126	146.664	216.795	170.515	137.731	5.01841e-06	1.35251e-07	1.74147e-08	0.00491781	5.697e-07	0.00039276	0.000467863	2.61236e-07	0.000131316	0.00110428	5	5	212.362	159.966	33.5298	35.4469	0.170549	0.210882	2.32232	2.19616	0.0735383	0.0905907	-0.419103	-1.23285	-2.71918	0.0399885	0	0	0	0	0	0
sp|Q92747|ARC1A_HUMAN	Q92747	sp|Q92747|ARC1A_HUMAN	>sp|Q92747|ARC1A_HUMAN Actin-related protein 2/3 complex subunit 1A OS=Homo sapiens GN=ARPC1A PE=1 SV=2	ARPC1A	ARPC1A	10552	4	4884.76	5306.78	4867.65	4153.41	4590.72	4593.33	4428.94	4863.83	4352.49	4332.83	2.33499e-08	5.05843e-08	2.25569e-09	1.00332e-07	2.32193e-08	6.75303e-08	1.47362e-08	1.35458e-08	4.6548e-09	7.1723e-09	5	5	4760.66	4514.28	425.067	220.689	0.0907939	0.0480862	3.67626	3.65418	0.0393504	0.0208715	-0.0733238	-0.692091	-1.04862	0.400466	0	0	0	0	0	0
sp|O15144|ARPC2_HUMAN	O15144	sp|O15144|ARPC2_HUMAN	>sp|O15144|ARPC2_HUMAN Actin-related protein 2/3 complex subunit 2 OS=Homo sapiens GN=ARPC2 PE=1 SV=1	ARPC2	ARPC2	10109	7	6021.37	5720.53	5363.73	5672.67	5056.77	4213.73	3874.93	4619.46	4012.3	3806.42	2.15571e-08	1.99161e-08	1.35853e-09	1.68264e-08	1.30999e-08	1.39573e-07	4.73612e-09	1.50906e-08	2.13339e-08	1.89389e-08	5	5	5567.01	4105.37	368.386	326.788	0.066891	0.0778148	3.74485	3.61229	0.029018	0.0337435	-0.440373	-1.74642	-6.30143	0.000392687	-1	0	0	0	0	0
sp|O15145|ARPC3_HUMAN	O15145	sp|O15145|ARPC3_HUMAN	>sp|O15145|ARPC3_HUMAN Actin-related protein 2/3 complex subunit 3 OS=Homo sapiens GN=ARPC3 PE=1 SV=3	ARPC3	ARPC3	10094	2	424.684	462.327	423.36	452.748	354.046	348.114	336.678	322.557	310.184	332.034	1.91069e-07	1.10695e-07	1.45574e-09	1.52253e-07	2.46797e-08	1.9518e-09	4.70744e-09	3.1709e-08	4.62546e-09	5.67311e-10	5	5	423.433	329.913	42.3918	14.3606	0.105351	0.0437388	2.62493	2.51807	0.0456271	0.0189864	-0.354979	-1.63772	-4.72981	0.0023719	-1	0	0	0	0	0
sp|P59998|ARPC4_HUMAN	P59998	sp|P59998|ARPC4_HUMAN	>sp|P59998|ARPC4_HUMAN Actin-related protein 2/3 complex subunit 4 OS=Homo sapiens GN=ARPC4 PE=1 SV=3	ARPC4	ARPC4	10093	5	10175	11407.3	10198.4	10388.2	9466.06	9893.87	9914.79	10171.6	9186.78	9680.56	2.4883e-08	7.48649e-08	1.72952e-09	6.15807e-09	1.18865e-07	3.77333e-08	9.98722e-09	3.45185e-09	9.08891e-09	2.80894e-09	5	5	10327	9769.51	698.49	369.358	0.0669158	0.0383176	4.01319	3.98962	0.0290287	0.016635	-0.078304	-0.923252	-1.32609	0.284367	0	0	0	0	0	0
sp|O15511|ARPC5_HUMAN	O15511	sp|O15511|ARPC5_HUMAN	>sp|O15511|ARPC5_HUMAN Actin-related protein 2/3 complex subunit 5 OS=Homo sapiens GN=ARPC5 PE=1 SV=3	ARPC5	ARPC5	10092	1	1273.65	1516.2	1458.18	1259.02	1276.68	1170.98	1168.21	1353.61	1133.64	1180.19	3.40531e-08	6.6401e-08	3.02865e-10	1.83246e-09	1.5085e-08	2.37804e-08	9.55889e-10	2.2157e-09	2.18518e-09	1.95759e-08	5	5	1356.74	1201.33	121.015	86.9402	0.0878887	0.0696139	3.13115	3.0788	0.0380962	0.0301964	-0.173895	-1.22993	-2.34389	0.0693135	0	0	0	0	0	0
sp|Q9BPX5|ARP5L_HUMAN	Q9BPX5	sp|Q9BPX5|ARP5L_HUMAN	>sp|Q9BPX5|ARP5L_HUMAN Actin-related protein 2/3 complex subunit 5-like protein OS=Homo sapiens GN=ARPC5L PE=1 SV=1	ARPC5L	ARPC5L	81873	3	2723.3	3179.82	3218.9	2980.42	2942.92	3045.41	3155.16	2949.87	2930.31	2889.43	4.49907e-09	1.79626e-08	1.1831e-09	1.90944e-09	1.422e-08	5.65765e-08	2.45212e-09	4.61738e-09	1.60106e-08	1.26676e-09	5	5	3009.07	2994.04	200.027	106.719	0.0673757	0.035311	3.47765	3.47604	0.0292278	0.0153306	-0.00535864	-0.0732588	-0.0913916	0.94936	0	0	0	0	0	0
sp|P49407-2|ARRB1_HUMAN	P49407-2	sp|P49407-2|ARRB1_HUMAN	>sp|P49407-2|ARRB1_HUMAN Isoform of P49407, Isoform 1B of Beta-arrestin-1 OS=Homo sapiens GN=ARRB1	ARRB1	ARRB1	408	2	235.637	233.369	238.408	241.797	255.735	203.529	222.923	225.432	216.413	201.831	8.55832e-07	9.1897e-07	3.42986e-07	5.69656e-05	3.5809e-06	8.64756e-08	7.41537e-08	0.000447628	1.88536e-07	2.41376e-05	5	5	240.989	214.025	8.82407	10.8842	0.0360311	0.0511291	2.38177	2.33001	0.015643	0.0221906	-0.171931	-1.58098	-3.21119	0.0196879	0	0	0	0	1	0
tr|E7EMM4|E7EMM4_HUMAN	E7EMM4	tr|E7EMM4|E7EMM4_HUMAN	>tr|E7EMM4|E7EMM4_HUMAN Isoform of Q13510, Acid ceramidase OS=Homo sapiens GN=ASAH1 PE=1 SV=1	ASAH1	ASAH1	427	1	51.6582	30.9668	56.1793	53.7991	93.4571	118.604	156.587	147.922	182.052	132.063	0.0086596	0.214423	1.33481e-05	0.00493638	3.01701e-06	9.18077e-08	3.72732e-07	5.54802e-08	3.41838e-08	9.87485e-08	5	5	57.2121	147.446	22.6168	24.2378	0.407167	0.164673	1.731	2.16397	0.170094	0.0710388	1.43831	1.67054	6.0356	0.0005025	1	1	0	0	0	0
tr|A0A0A0MRE5|A0A0A0MRE5_HUMAN	A0A0A0MRE5	tr|A0A0A0MRE5|A0A0A0MRE5_HUMAN	>tr|A0A0A0MRE5|A0A0A0MRE5_HUMAN Isoform of Q9ULH1, Arf-GAP with SH3 domain, ANK repeat and PH domain-containing protein 1 OS=Homo sapiens GN=ASAP1 PE=1 SV=1	ASAP1	ASAP1	50807	3	294.998	366.133	361.566	360.011	320.003	302.522	238.782	236.441	262.587	244.199	5.60171e-07	1.22821e-07	3.18601e-08	2.00583e-06	7.89178e-07	6.33211e-08	4.35498e-07	9.84831e-07	1.51748e-05	7.33286e-07	5	5	340.542	256.906	31.512	27.4858	0.095543	0.102635	2.53062	2.4079	0.0413996	0.0444573	-0.407679	-1.60814	-4.65889	0.00258252	-1	0	0	0	0	0
tr|A0A087WXS7|A0A087WXS7_HUMAN	A0A087WXS7	tr|A0A087WXS7|A0A087WXS7_HUMAN	>tr|A0A087WXS7|A0A087WXS7_HUMAN Isoform of O43681, ATPase ASNA1 OS=Homo sapiens GN=ASNA1 PE=1 SV=1	ASNA1	ASNA1	439	5	847.047	896.662	893.421	891.192	825.404	1003.63	907.138	900.582	880.545	888.645	4.34959e-06	7.56444e-07	4.47165e-07	3.08062e-06	2.46383e-08	5.97812e-08	5.43587e-09	3.5217e-08	4.70284e-08	4.33886e-09	5	5	870.745	916.109	32.4861	50.0025	0.0376943	0.0529579	2.93965	2.96145	0.0163646	0.0229832	0.0724323	0.989211	1.33083	0.282936	0	1	0	0	0	0
sp|P00966|ASSY_HUMAN	P00966	sp|P00966|ASSY_HUMAN	>sp|P00966|ASSY_HUMAN Argininosuccinate synthase OS=Homo sapiens GN=ASS1 PE=1 SV=2	ASS1	ASS1	445	2	593.789	644.859	679.756	626.904	671.296	223.718	206.832	200.782	197.917	171.725	2.58727e-06	1.89171e-08	1.79472e-06	7.09206e-09	1.6871e-05	0.107478	0.0515486	0.0609765	0.0687198	0.0460228	5	5	643.32	200.195	34.7687	18.7982	0.0546599	0.0964139	2.80791	2.29987	0.0237208	0.0417752	-1.68767	-1.88394	-22.9354	3.06755e-08	-1	0	0	0	0	0
tr|H0Y3A8|H0Y3A8_HUMAN	H0Y3A8	tr|H0Y3A8|H0Y3A8_HUMAN	>tr|H0Y3A8|H0Y3A8_HUMAN Isoform of O75129, Astrotactin-2 (Fragment) OS=Homo sapiens GN=ASTN2 PE=1 SV=1	ASTN2	ASTN2	23245	1	44.935	54.5994	42.5987	54.6458	34.54	71.0237	57.2266	60.8965	56.4725	70.8527	9.23551e-05	1.03876e-05	0.000159939	3.38197e-07	5.32293e-06	9.86187e-06	0.00114314	1.54156e-06	8.13599e-06	4.47615e-06	5	5	46.2638	63.2944	8.54964	7.17593	0.193617	0.112744	1.65901	1.79916	0.0833142	0.0488095	0.465561	1.43039	3.5924	0.0112399	0	1	0	0	0	0
sp|Q8NBU5|ATAD1_HUMAN	Q8NBU5	sp|Q8NBU5|ATAD1_HUMAN	>sp|Q8NBU5|ATAD1_HUMAN ATPase family AAA domain-containing protein 1 OS=Homo sapiens GN=ATAD1 PE=1 SV=1	ATAD1	ATAD1	84896	4	1188.53	1074.4	1245.47	972.915	1372.81	980.273	934.503	1092.3	1087.5	1030.29	1.21901e-07	1.41817e-07	2.07187e-08	3.50909e-06	1.47606e-08	2.9017e-09	7.10271e-10	7.34737e-09	7.28395e-09	1.49865e-09	5	5	1170.82	1024.97	154.231	68.2889	0.133632	0.0673285	3.06544	3.00993	0.0577792	0.0292074	-0.184391	-1.06455	-2.00353	0.11291	0	0	0	0	0	0
sp|Q86WG3|ATCAY_HUMAN	Q86WG3	sp|Q86WG3|ATCAY_HUMAN	>sp|Q86WG3|ATCAY_HUMAN Caytaxin OS=Homo sapiens GN=ATCAY PE=1 SV=2	ATCAY	ATCAY	85300	1	123.214	117.749	118.543	133.411	156.922	123.848	136.328	155.032	115.635	91.8807	3.75403e-06	4.07707e-05	1.69653e-06	9.99441e-07	1.23364e-05	4.41203e-05	8.22251e-07	2.6921e-09	1.1758e-05	0.000178946	5	5	129.968	124.544	16.3081	23.5325	0.119894	0.197504	2.11127	2.08884	0.0518836	0.0849558	-0.0745228	-0.332798	-0.559432	0.66661	0	0	0	0	0	0
sp|O95352-3|ATG7_HUMAN	O95352-3	sp|O95352-3|ATG7_HUMAN	>sp|O95352-3|ATG7_HUMAN Isoform of O95352, Isoform 3 of Ubiquitin-like modifier-activating enzyme ATG7 OS=Homo sapiens GN=ATG7	ATG7	ATG7	10533	1	133	152.576	140.901	138.968	140.881	166.719	150.174	121.6	135.845	152.133	1.67419e-06	5.83827e-05	6.65872e-07	0.000404898	3.34696e-05	5.86187e-07	1.37751e-06	0.000718983	0.000548647	8.5123e-07	5	5	141.265	145.294	7.10305	17.1778	0.0496437	0.121039	2.1496	2.15976	0.0215467	0.0523754	0.033724	0.266222	0.406761	0.756251	0	1	0	0	0	0
sp|P31939-2|PUR9_HUMAN	P31939-2	sp|P31939-2|PUR9_HUMAN	>sp|P31939-2|PUR9_HUMAN Isoform of P31939, Isoform 2 of Bifunctional purine biosynthesis protein PURH OS=Homo sapiens GN=ATIC	ATIC	ATIC	471	2	172.818	162.795	191.618	155.867	187.687	253.238	229.905	249.226	250.208	262.21	0.269362	0.000272649	1.13105e-06	0.000416085	0.000216296	3.09084e-06	1.51143e-07	6.15974e-07	1.77378e-07	6.75305e-08	5	5	174.157	248.957	15.4384	11.8175	0.0890573	0.0483543	2.23957	2.39572	0.0386007	0.0209877	0.51873	1.78752	7.48529	0.000122535	1	1	0	0	0	0
sp|Q8WXF7|ATLA1_HUMAN	Q8WXF7	sp|Q8WXF7|ATLA1_HUMAN	>sp|Q8WXF7|ATLA1_HUMAN Atlastin-1 OS=Homo sapiens GN=ATL1 PE=1 SV=1	ATL1	ATL1	51062	3	646.437	746.226	739.746	637.773	624.191	774.205	718.243	956.75	780.205	732.523	2.53093e-08	7.74699e-09	1.48713e-10	8.36118e-09	1.35226e-07	2.04342e-09	6.92481e-09	6.92029e-09	2.32924e-09	5.59144e-10	5	5	678.874	792.385	59.1046	95.6231	0.0862224	0.114372	2.83049	2.89659	0.0373766	0.0495098	0.219575	1.22239	2.46834	0.0580443	0	1	0	0	0	0
sp|Q8NHH9-3|ATLA2_HUMAN	Q8NHH9-3	sp|Q8NHH9-3|ATLA2_HUMAN	>sp|Q8NHH9-3|ATLA2_HUMAN Isoform of Q8NHH9, Isoform 3 of Atlastin-2 OS=Homo sapiens GN=ATL2	ATL2	ATL2	64225	1	107.707	115.231	116.276	112.837	108.044	71.741	71.9356	80.8458	71.5175	101.785	5.16874e-09	5.69493e-07	9.60158e-10	2.76441e-07	2.46579e-08	4.11958e-06	0.000433594	3.39089e-05	0.00246603	1.38306e-06	5	5	112.019	79.5651	3.98406	13.0343	0.0356742	0.153109	2.04907	1.89649	0.0154882	0.0661095	-0.506851	-1.65341	-5.29884	0.00117489	-1	0	0	0	0	0
sp|P05023-4|AT1A1_HUMAN	P05023-4	sp|P05023-4|AT1A1_HUMAN	>sp|P05023-4|AT1A1_HUMAN Isoform of P05023, Isoform 4 of Sodium/potassium-transporting ATPase subunit alpha-1 OS=Homo sapiens GN=ATP1A1	ATP1A1	ATP1A1	476	11	22362.2	24019.8	21687.2	20596.2	20688.4	15391.4	14449	16357	15473.2	15225.7	6.33468e-08	1.15287e-07	7.74772e-09	1.98222e-07	2.17572e-07	6.95847e-07	2.40637e-07	1.02279e-07	1.72472e-07	2.06142e-07	5	5	21870.8	15379.3	1406.79	680.825	0.0633703	0.0442602	4.33916	4.1866	0.0274938	0.0192126	-0.50681	-1.828	-8.57166	4.94108e-05	-1	0	0	0	0	0
tr|B1AKY9|B1AKY9_HUMAN	B1AKY9	tr|B1AKY9|B1AKY9_HUMAN	>tr|B1AKY9|B1AKY9_HUMAN Isoform of P50993, Sodium/potassium-transporting ATPase subunit alpha OS=Homo sapiens GN=ATP1A2 PE=1 SV=1	ATP1A2	ATP1A2	477	19	26188	31352.3	27236.8	29093.8	33528.7	30002.1	31945	29870.6	37061.3	35196.7	7.70617e-08	1.54614e-07	5.35712e-09	3.75167e-08	7.37213e-08	6.14628e-08	1.17826e-08	2.54038e-08	8.71936e-09	7.77204e-09	5	5	29479.9	32815.1	2996.49	3203.21	0.101162	0.0967112	4.46775	4.51444	0.0438225	0.0419034	0.155117	0.986702	1.7753	0.156991	0	1	0	0	0	0
sp|P13637|AT1A3_HUMAN	P13637	sp|P13637|AT1A3_HUMAN	>sp|P13637|AT1A3_HUMAN Sodium/potassium-transporting ATPase subunit alpha-3 OS=Homo sapiens GN=ATP1A3 PE=1 SV=3	ATP1A3	ATP1A3	478	24	141626	141700	141317	130389	129747	94374.4	93174.3	111083	111557	102305	1.85532e-07	4.20559e-07	7.82412e-09	1.28171e-07	1.94304e-07	8.95828e-08	8.70561e-09	1.80316e-08	1.08052e-08	5.78051e-08	5	5	136956	102499	6293.4	8785.55	0.0463961	0.0860629	5.13621	5.00944	0.0201387	0.0373077	-0.421122	-1.74744	-6.21815	0.000425009	-1	0	0	0	0	0
sp|P05026-2|AT1B1_HUMAN	P05026-2	sp|P05026-2|AT1B1_HUMAN	>sp|P05026-2|AT1B1_HUMAN Isoform of P05026, Isoform 2 of Sodium/potassium-transporting ATPase subunit beta-1 OS=Homo sapiens GN=ATP1B1	ATP1B1	ATP1B1	481	6	78157.4	89291.8	90860.3	78898.5	75703.7	53334.6	58195.5	70519.7	70198.1	60821.5	8.27695e-08	5.02034e-07	3.4517e-08	1.57385e-07	2.71644e-07	4.51091e-08	5.05399e-08	8.00358e-08	5.8837e-08	7.52194e-08	5	5	82582.3	62613.9	6964.33	7564.06	0.083612	0.121862	4.91567	4.79412	0.036249	0.0527292	-0.40378	-1.57928	-4.42872	0.00349681	-1	0	0	0	0	0
sp|P14415|AT1B2_HUMAN	P14415	sp|P14415|AT1B2_HUMAN	>sp|P14415|AT1B2_HUMAN Sodium/potassium-transporting ATPase subunit beta-2 OS=Homo sapiens GN=ATP1B2 PE=1 SV=3	ATP1B2	ATP1B2	482	5	3819.99	4945.42	4691.45	4544.04	5557.05	4236.55	4841.39	5126.38	6257.24	4625.52	1.74938e-08	2.08011e-08	1.49054e-09	5.10563e-08	2.09931e-08	5.49716e-09	1.23136e-09	3.55217e-09	3.26434e-09	8.17941e-09	5	5	4711.59	5017.42	631.049	765.402	0.13725	0.146853	3.66997	3.69667	0.0593291	0.0634376	0.0886801	0.447984	0.751938	0.554569	0	1	0	0	0	0
sp|P54709|AT1B3_HUMAN	P54709	sp|P54709|AT1B3_HUMAN	>sp|P54709|AT1B3_HUMAN Sodium/potassium-transporting ATPase subunit beta-3 OS=Homo sapiens GN=ATP1B3 PE=1 SV=1	ATP1B3	ATP1B3	483	1	199.252	258.166	239.378	248.61	261.898	181.24	50.1505	53.1103	138.644	58.4391	5.11797e-05	1.10855e-05	6.56295e-07	4.41925e-05	2.74199e-06	0.532332	0.225303	0.452472	0.343985	0.232212	5	5	241.461	96.3169	25.1685	60.0758	0.110803	0.660841	2.38081	1.91846	0.0479743	0.261428	-1.53587	-1.53454	-4.50428	0.00316292	-1	0	0	0	0	0
sp|P16615|AT2A2_HUMAN	P16615	sp|P16615|AT2A2_HUMAN	>sp|P16615|AT2A2_HUMAN Sarcoplasmic/endoplasmic reticulum calcium ATPase 2 OS=Homo sapiens GN=ATP2A2 PE=1 SV=1	ATP2A2	ATP2A2	488	22	10751.3	11386.1	10206.4	9829.38	9308.61	9416.88	9337.09	10120.4	8837.32	9890.27	3.6861e-08	3.66772e-08	9.38033e-10	3.04531e-08	1.42322e-08	1.94959e-08	8.09813e-09	1.39911e-08	9.89259e-09	3.11076e-09	5	5	10296.4	9520.4	805.658	501.935	0.0781621	0.0530061	4.01162	3.97817	0.0338937	0.0230041	-0.111134	-1.02918	-1.67678	0.17946	0	0	0	0	0	0
sp|P20020-4|AT2B1_HUMAN	P20020-4	sp|P20020-4|AT2B1_HUMAN	>sp|P20020-4|AT2B1_HUMAN Isoform of P20020, Isoform C of Plasma membrane calcium-transporting ATPase 1 OS=Homo sapiens GN=ATP2B1	ATP2B1	ATP2B1	490	15	28074.8	29782.2	28356.4	23587.5	22077	13504.5	14785.1	16552.9	15632.2	15533.9	5.16483e-08	9.26014e-08	4.22944e-09	4.33453e-08	1.37806e-07	2.59771e-08	4.86443e-08	1.48262e-08	5.97175e-08	1.16168e-07	5	5	26375.6	15201.7	3341.67	1137.48	0.130752	0.0763648	4.41831	4.1809	0.0565444	0.0331166	-0.788669	-1.79133	-8.48653	5.21172e-05	-1	0	0	0	0	0
sp|Q01814-6|AT2B2_HUMAN;sp|Q01814-4|AT2B2_HUMAN	Q01814-6;Q01814-4	sp|Q01814-6|AT2B2_HUMAN;sp|Q01814-4|AT2B2_HUMAN	>sp|Q01814-6|AT2B2_HUMAN Isoform of Q01814, Isoform ZB of Plasma membrane calcium-transporting ATPase 2 OS=Homo sapiens GN=ATP2B2;>sp|Q01814-4|AT2B2_HUMAN Isoform of Q01814, Isoform ZA of Plasma membrane calcium-transporting ATPase 2 OS=Homo sapiens GN=ATP2B2	ATP2B2	ATP2B2	491	17	10672.8	11160.6	10101.5	9913.36	10027.5	8617.87	9057.6	9071.23	8770.59	8659.77	4.42519e-09	3.86438e-08	9.12606e-10	1.07496e-08	8.72112e-09	4.97296e-09	1.37625e-09	6.00136e-09	2.62541e-09	3.064e-09	5	5	10375.2	8835.41	527.845	216.422	0.0502039	0.0244437	4.01555	3.94612	0.0217896	0.0106142	-0.230644	-1.73569	-4.50267	0.00316547	-1	0	0	0	0	0
sp|Q16720-6|AT2B3_HUMAN;sp|Q16720-4|AT2B3_HUMAN	Q16720-6;Q16720-4	sp|Q16720-6|AT2B3_HUMAN;sp|Q16720-4|AT2B3_HUMAN	>sp|Q16720-6|AT2B3_HUMAN Isoform of Q16720, Isoform ZE of Plasma membrane calcium-transporting ATPase 3 OS=Homo sapiens GN=ATP2B3;>sp|Q16720-4|AT2B3_HUMAN Isoform of Q16720, Isoform ZB of Plasma membrane calcium-transporting ATPase 3 OS=Homo sapiens GN=ATP2B3	ATP2B3	ATP2B3	492	18	11014.1	10373.2	10539.2	9195.98	10276.5	8463.73	9100.89	9446.69	9221.78	9097.22	7.62285e-09	3.41627e-08	8.75921e-10	3.1502e-08	1.06517e-08	2.56255e-09	1.46765e-09	4.52787e-09	2.53065e-09	1.61049e-08	5	5	10279.8	9066.06	668.916	365.416	0.0668958	0.0410416	4.01122	3.95713	0.0290201	0.0178166	-0.179689	-1.48426	-3.01499	0.0258071	0	0	0	0	0	0
sp|P98194-2|AT2C1_HUMAN	P98194-2	sp|P98194-2|AT2C1_HUMAN	>sp|P98194-2|AT2C1_HUMAN Isoform of P98194, Isoform 2 of Calcium-transporting ATPase type 2C member 1 OS=Homo sapiens GN=ATP2C1	ATP2C1	ATP2C1	27032	3	222.541	213.004	209.207	215.876	229.762	262.68	254.614	256.468	252.242	264.462	0.000101357	6.17944e-05	1.22657e-05	0.000598663	1.95563e-05	1.39736e-06	8.15517e-07	3.12494e-07	6.45465e-08	3.77358e-07	5	5	218.078	258.093	8.15074	5.25775	0.0371441	0.0203385	2.33837	2.4117	0.0161259	0.00883199	0.243607	1.80859	5.17107	0.00136439	1	1	0	0	0	0
sp|P25705|ATPA_HUMAN	P25705	sp|P25705|ATPA_HUMAN	>sp|P25705|ATPA_HUMAN ATP synthase subunit alpha, mitochondrial OS=Homo sapiens GN=ATP5A1 PE=1 SV=1	ATP5A1	ATP5A1	498	21	228389	206053	207996	174027	211394	196897	181985	209092	224992	223047	7.60449e-07	8.59786e-07	9.29966e-08	9.55027e-07	1.49938e-06	9.51909e-07	4.65909e-07	1.05143e-06	4.62472e-07	5.48527e-07	5	5	205572	207203	19721.2	18119.3	0.0998432	0.0891874	5.31128	5.31504	0.0432539	0.0386569	0.012461	0.0968673	0.147575	0.917792	0	1	0	0	0	0
sp|P06576|ATPB_HUMAN	P06576	sp|P06576|ATPB_HUMAN	>sp|P06576|ATPB_HUMAN ATP synthase subunit beta, mitochondrial OS=Homo sapiens GN=ATP5B PE=1 SV=3	ATP5B	ATP5B	506	35	305563	272137	278478	239318	282187	317030	291707	329130	350988	375451	6.70424e-07	3.15233e-07	5.89186e-09	1.82079e-07	2.21559e-07	3.88254e-07	7.12349e-08	1.23821e-07	1.3554e-07	1.8379e-07	5	5	275537	332861	23863	32018.1	0.0886988	0.0966069	5.43884	5.52065	0.0384459	0.0418585	0.271778	1.42528	3.26927	0.0181657	0	1	0	0	0	0
sp|O75947|ATP5H_HUMAN	O75947	sp|O75947|ATP5H_HUMAN	>sp|O75947|ATP5H_HUMAN ATP synthase subunit d, mitochondrial OS=Homo sapiens GN=ATP5H PE=1 SV=3	ATP5H	ATP5H	10476	2	1668.79	1197.93	1424.15	1063.43	1545.29	1305.83	1393.97	1261.23	1433.31	1332.5	0.249397	0.280482	0.260455	0.240585	0.277768	4.60742e-06	4.42762e-07	1.71314e-05	4.36579e-05	3.70574e-05	5	5	1379.92	1345.37	248.012	68.7453	0.186602	0.0510621	3.13402	3.12839	0.0803479	0.0221615	-0.0187115	-0.101227	-0.164492	0.907718	0	0	0	0	0	0
sp|P56385|ATP5I_HUMAN	P56385	sp|P56385|ATP5I_HUMAN	>sp|P56385|ATP5I_HUMAN ATP synthase subunit e, mitochondrial OS=Homo sapiens GN=ATP5I PE=1 SV=2	ATP5I	ATP5I	521	2	3841.82	3744.01	4355.89	3578.83	4755.33	5263.61	5366.54	5508.82	5869.94	5952.59	2.90712e-08	1.31302e-07	9.23628e-09	5.08176e-06	2.87674e-07	4.8793e-07	1.53791e-07	2.20354e-07	4.77732e-07	2.24837e-08	5	5	4055.17	5592.3	487.313	305.315	0.11792	0.0544288	3.60557	3.74708	0.0510353	0.0236207	0.470056	1.69521	5.69985	0.000747774	1	1	0	0	0	0
sp|P48047|ATPO_HUMAN	P48047	sp|P48047|ATPO_HUMAN	>sp|P48047|ATPO_HUMAN ATP synthase subunit O, mitochondrial OS=Homo sapiens GN=ATP5O PE=1 SV=1	ATP5O	ATP5O	539	2	11053	8947.55	10007.2	8890.69	11315.9	11570.4	12339.9	11855.1	12343.9	12278.1	3.19071e-08	1.25467e-07	5.34484e-08	8.83721e-08	6.02199e-07	1.84968e-07	9.36409e-08	1.46523e-07	3.33274e-07	9.41706e-08	5	5	10042.9	12077.5	1136.84	348.83	0.11383	0.0291374	3.99963	4.08183	0.0492765	0.0126515	0.273077	1.49403	3.56442	0.0117051	0	1	0	0	0	0
sp|Q93050-1|VPP1_HUMAN	Q93050-1	sp|Q93050-1|VPP1_HUMAN	>sp|Q93050-1|VPP1_HUMAN Isoform of Q93050, Isoform 2 of V-type proton ATPase 116 kDa subunit a isoform 1 OS=Homo sapiens GN=ATP6V0A1	ATP6V0A1	ATP6V0A1	535	25	43122.3	44637.9	43193	43196.3	40416.2	43529	42484.7	44836.2	43160.8	44010.4	3.94507e-07	1.90404e-07	2.25597e-08	2.90065e-07	2.66578e-07	6.41691e-08	3.52796e-08	3.82557e-08	6.31791e-08	3.24806e-08	5	5	42913.1	43604.2	1533.92	885.765	0.0362548	0.020288	4.63236	4.63946	0.0157401	0.00881005	0.0235618	0.563238	0.502483	0.700689	0	1	0	1	0	0
sp|P61421|VA0D1_HUMAN	P61421	sp|P61421|VA0D1_HUMAN	>sp|P61421|VA0D1_HUMAN V-type proton ATPase subunit d 1 OS=Homo sapiens GN=ATP6V0D1 PE=1 SV=1	ATP6V0D1	ATP6V0D1	9114	5	18900.2	19692.6	19463.1	19939.7	18669.3	20522.8	22075.6	20447.5	20748.1	19407.2	2.86552e-08	3.19637e-08	6.59854e-09	2.50828e-07	7.13465e-08	1.41699e-07	1.60358e-08	1.02239e-07	3.21416e-08	6.3877e-08	5	5	19333	20640.2	534.34	954.362	0.0277167	0.0460093	4.28617	4.31435	0.0120349	0.019971	0.0936125	1.31074	1.85276	0.140658	0	1	0	1	0	0
sp|P38606-2|VATA_HUMAN	P38606-2	sp|P38606-2|VATA_HUMAN	>sp|P38606-2|VATA_HUMAN Isoform of P38606, Isoform 2 of V-type proton ATPase catalytic subunit A OS=Homo sapiens GN=ATP6V1A	ATP6V1A	ATP6V1A	523	17	21547.1	22856.3	22949.5	23023.9	20234.2	25053	25555.1	23565.4	22165.8	23034.4	2.99738e-08	6.25579e-08	2.69592e-09	1.27795e-07	4.77732e-08	1.33597e-07	1.51808e-08	6.31545e-08	1.31239e-07	4.20023e-08	5	5	22122.2	23874.7	1217.77	1408.38	0.0562901	0.0590154	4.34429	4.37733	0.0244271	0.0256078	0.109783	1.12691	1.80419	0.150788	0	1	0	1	0	0
sp|P21281|VATB2_HUMAN	P21281	sp|P21281|VATB2_HUMAN	>sp|P21281|VATB2_HUMAN V-type proton ATPase subunit B, brain isoform OS=Homo sapiens GN=ATP6V1B2 PE=1 SV=3	ATP6V1B2	ATP6V1B2	526	15	26470	28309.1	27371.5	28088.4	26438.7	25855.3	26466.9	26372.3	24887.4	24474.9	2.26548e-08	5.41915e-08	1.29226e-09	1.15974e-08	1.24248e-08	5.06242e-08	5.46593e-09	1.73994e-08	1.36363e-08	7.10771e-09	5	5	27335.6	25611.4	876.006	892.494	0.0320708	0.035039	4.43655	4.40822	0.0139246	0.0152126	-0.0941077	-1.39575	-1.93682	0.124807	0	0	0	1	0	0
sp|P21283|VATC1_HUMAN	P21283	sp|P21283|VATC1_HUMAN	>sp|P21283|VATC1_HUMAN V-type proton ATPase subunit C 1 OS=Homo sapiens GN=ATP6V1C1 PE=1 SV=4	ATP6V1C1	ATP6V1C1	528	10	5771.82	6521.77	6269.74	6713.11	6186.17	6461.95	6471.77	7120.35	6462.71	6030.44	7.5244e-08	1.91111e-07	4.13095e-09	3.50508e-08	2.74591e-08	8.35487e-08	7.05049e-09	3.19555e-08	3.86875e-08	1.39856e-08	5	5	6292.52	6509.44	357.914	390.034	0.0575416	0.0592506	3.79825	3.81293	0.0249693	0.0257097	0.0487512	0.584367	0.795626	0.529312	0	1	0	1	0	0
sp|Q9Y5K8|VATD_HUMAN	Q9Y5K8	sp|Q9Y5K8|VATD_HUMAN	>sp|Q9Y5K8|VATD_HUMAN V-type proton ATPase subunit D OS=Homo sapiens GN=ATP6V1D PE=1 SV=1	ATP6V1D	ATP6V1D	51382	5	3019.57	2568.86	2759.06	3067.51	2510.29	2493.47	2447.16	2813.07	2445.99	2410.84	2.74151e-08	5.05539e-07	1.06815e-09	1.27015e-07	1.3406e-07	1.7086e-07	1.54079e-08	1.0456e-07	4.20787e-08	2.21992e-06	5	5	2785.06	2522.11	253.818	165.28	0.09132	0.0631551	3.44339	3.40105	0.0395775	0.0274006	-0.140641	-1.08317	-1.90864	0.129932	0	0	0	1	0	0
sp|Q16864|VATF_HUMAN	Q16864	sp|Q16864|VATF_HUMAN	>sp|Q16864|VATF_HUMAN V-type proton ATPase subunit F OS=Homo sapiens GN=ATP6V1F PE=1 SV=2	ATP6V1F	ATP6V1F	9296	3	2767.08	3325.11	3339.26	3951.52	2963.96	3254.5	3213.83	3038.64	3300.6	3342.17	1.03682e-08	2.48897e-08	5.01234e-09	2.30999e-07	1.43672e-07	2.11456e-08	5.50569e-09	6.12303e-09	1.80611e-09	8.01314e-09	5	5	3269.38	3229.95	452.463	117.311	0.136467	0.0369027	3.51122	3.50896	0.0589938	0.0160212	-0.00751196	-0.0554639	-0.0854251	0.952044	0	0	0	1	0	0
sp|O75348|VATG1_HUMAN	O75348	sp|O75348|VATG1_HUMAN	>sp|O75348|VATG1_HUMAN V-type proton ATPase subunit G 1 OS=Homo sapiens GN=ATP6V1G1 PE=1 SV=3	ATP6V1G1	ATP6V1G1	9550	1	164.708	181.399	151.175	188.477	161.736	92.3163	77.92	178.177	114.794	70.1351	1.52403e-09	8.80844e-09	5.31361e-11	1.4095e-07	7.71394e-09	1.56523e-08	7.39484e-09	1.5421e-09	1.24534e-09	1.80093e-08	5	5	169.499	106.668	15.1718	43.4358	0.0895157	0.382789	2.22778	2.00273	0.0387986	0.160594	-0.747609	-1.39037	-3.48771	0.0131861	0	0	0	1	0	0
sp|O95670|VATG2_HUMAN	O95670	sp|O95670|VATG2_HUMAN	>sp|O95670|VATG2_HUMAN V-type proton ATPase subunit G 2 OS=Homo sapiens GN=ATP6V1G2 PE=2 SV=1	ATP6V1G2	ATP6V1G2	534	5	3236.17	3043.58	3177.31	3222.04	2719.18	2548.89	2267.32	2541.04	2385.25	2272.24	1.89515e-08	4.04682e-08	1.18935e-09	1.67705e-08	3.89564e-08	8.02302e-08	2.97424e-09	4.64725e-09	2.68385e-08	8.57547e-09	5	5	3079.66	2402.95	215.378	137.99	0.072707	0.0573814	3.48761	3.38017	0.0315346	0.0248999	-0.356895	-1.71513	-5.44908	0.000997414	-1	0	0	1	0	0
sp|Q9UI12-2|VATH_HUMAN	Q9UI12-2	sp|Q9UI12-2|VATH_HUMAN	>sp|Q9UI12-2|VATH_HUMAN Isoform of Q9UI12, Isoform 2 of V-type proton ATPase subunit H OS=Homo sapiens GN=ATP6V1H	ATP6V1H	ATP6V1H	51606	11	5193.73	5304.36	5188.3	5633.5	5118.66	4689.86	4633.53	5251.38	4805.24	4151.48	7.8496e-09	3.20189e-08	1.0833e-09	1.28232e-08	1.8005e-08	1.13048e-07	4.65027e-09	3.83174e-09	3.61996e-08	2.61381e-08	5	5	5287.71	4706.3	204.412	393.791	0.0379554	0.0843993	3.72301	3.67145	0.0164779	0.0365891	-0.171285	-1.35213	-2.61723	0.0464766	0	0	0	1	0	0
sp|P36543|VATE1_HUMAN	P36543	sp|P36543|VATE1_HUMAN	>sp|P36543|VATE1_HUMAN V-type proton ATPase subunit E 1 OS=Homo sapiens GN=ATP6V1E1 PE=1 SV=1	ATP6V1E1	ATP6V1E1	529	10	14857.1	15622.3	14820.8	16821.9	13879.1	17395.7	17217	15667.4	14925	15675.9	2.27669e-08	3.48498e-07	1.54696e-08	1.64885e-07	1.7673e-08	1.46145e-06	2.57797e-08	2.21727e-07	1.42405e-07	1.6905e-06	5	5	15200.2	16176.2	1097.16	1077.62	0.0715638	0.0664889	4.18096	4.20811	0.0310401	0.0288439	0.0901969	0.857435	1.33228	0.282516	0	1	0	1	0	0
sp|Q9Y2Q0|AT8A1_HUMAN	Q9Y2Q0	sp|Q9Y2Q0|AT8A1_HUMAN	>sp|Q9Y2Q0|AT8A1_HUMAN Phospholipid-transporting ATPase IA OS=Homo sapiens GN=ATP8A1 PE=1 SV=1	ATP8A1	ATP8A1	10396	13	5198.95	5161.43	5231.64	5684.2	5045.12	6360.01	6668.67	7032.9	6647.77	6194.65	1.39552e-07	1.47916e-08	3.07734e-09	4.16616e-08	2.62721e-08	6.3852e-08	2.52921e-09	2.5799e-08	1.5774e-08	1.42055e-08	5	5	5264.27	6580.8	245.092	321.894	0.0455172	0.0487882	3.72097	3.81786	0.0197576	0.0211759	0.321869	1.77475	5.84582	0.000632318	1	1	0	0	0	0
sp|Q9NTI2|AT8A2_HUMAN	Q9NTI2	sp|Q9NTI2|AT8A2_HUMAN	>sp|Q9NTI2|AT8A2_HUMAN Phospholipid-transporting ATPase IB OS=Homo sapiens GN=ATP8A2 PE=1 SV=2	ATP8A2	ATP8A2	51761	2	157.967	139.447	137.061	146.814	155.268	169.114	178.524	183.852	170.821	173.461	1.20828e-05	0.00204405	0.00147946	0.0059716	1.16139e-05	5.63955e-06	3.96273e-06	5.69319e-07	2.06296e-05	9.797e-06	5	5	147.311	175.154	9.27411	6.02393	0.0630227	0.0341597	2.16755	2.24322	0.0273433	0.014831	0.25137	1.68339	4.41575	0.00355407	1	1	0	0	0	0
sp|O75110|ATP9A_HUMAN	O75110	sp|O75110|ATP9A_HUMAN	>sp|O75110|ATP9A_HUMAN Probable phospholipid-transporting ATPase IIA OS=Homo sapiens GN=ATP9A PE=1 SV=3	ATP9A	ATP9A	10079	2	219.081	212.102	237.947	215.008	228.869	287.65	291.787	287.637	312.431	310.952	8.8588e-09	6.0573e-07	1.63901e-09	1.3355e-07	2.28253e-08	6.96141e-08	1.08773e-09	3.58936e-09	9.81585e-10	6.98865e-09	5	5	222.601	298.091	10.6659	12.5408	0.0474716	0.0418271	2.34713	2.47404	0.0206051	0.0181574	0.421586	1.83004	7.83615	8.93248e-05	1	1	0	0	0	0
sp|Q13825|AUHM_HUMAN	Q13825	sp|Q13825|AUHM_HUMAN	>sp|Q13825|AUHM_HUMAN Methylglutaconyl-CoA hydratase, mitochondrial OS=Homo sapiens GN=AUH PE=1 SV=1	AUH	AUH	549	8	4340.85	3645.95	4070.51	3875.15	3686.83	5572.92	5397.95	5915.07	5453.63	5491.14	1.90398e-07	1.16947e-07	1.63077e-08	3.65459e-06	8.48102e-07	1.15721e-07	4.88588e-07	1.15092e-07	7.01152e-08	1.15265e-08	5	5	3923.86	5566.14	287.739	205.164	0.07248	0.0362034	3.5928	3.74532	0.0314364	0.0157178	0.50669	1.82157	8.35847	5.78053e-05	1	1	0	0	0	0
sp|Q9UQB8-3|BAIP2_HUMAN	Q9UQB8-3	sp|Q9UQB8-3|BAIP2_HUMAN	>sp|Q9UQB8-3|BAIP2_HUMAN Isoform of Q9UQB8, Isoform 3 of Brain-specific angiogenesis inhibitor 1-associated protein 2 OS=Homo sapiens GN=BAIAP2	BAIAP2	BAIAP2	10458	16	7902.36	7749.25	7757.79	8067.97	8757.31	9102.96	8496.55	8980.06	9117.68	8412	1.8404e-08	9.32058e-08	1.13876e-09	2.62625e-08	4.40097e-08	2.03115e-08	5.75278e-09	2.47947e-08	6.84835e-09	2.41503e-08	5	5	8046.94	8821.85	417.792	341.092	0.0506458	0.0389405	3.90518	3.9453	0.0219811	0.0169052	0.133274	1.42842	2.46707	0.0581148	0	1	0	0	0	0
tr|A0A024RCR6|A0A024RCR6_HUMAN	A0A024RCR6	tr|A0A024RCR6|A0A024RCR6_HUMAN	>tr|A0A024RCR6|A0A024RCR6_HUMAN Isoform of P46379, HLA-B associated transcript 3, isoform CRA_a OS=Homo sapiens GN=BAT3 PE=1 SV=1	BAT3	BAT3	7917	4	459.642	404.045	428.881	399.511	492.731	478.46	512.837	427.462	469.173	465.349	2.82337e-05	0.000173778	0.000113585	0.00526603	1.25886e-05	2.59125e-05	8.93594e-07	3.38802e-05	6.72671e-07	1.24953e-06	5	5	436.962	470.656	39.2937	30.5624	0.0888451	0.0653151	2.63906	2.67197	0.0385091	0.0283358	0.109298	0.90675	1.49027	0.230541	0	1	0	0	0	0
sp|Q96GW7|PGCB_HUMAN	Q96GW7	sp|Q96GW7|PGCB_HUMAN	>sp|Q96GW7|PGCB_HUMAN Brevican core protein OS=Homo sapiens GN=BCAN PE=1 SV=2	BCAN	BCAN	63827	2	1081.88	1299.97	1134.28	992.135	1003.76	694.274	742.155	820.775	666.643	769.126	3.10896e-08	3.17612e-08	2.6923e-09	3.87283e-08	3.44396e-08	3.16192e-07	3.82621e-09	4.38918e-09	3.00492e-09	3.57558e-08	5	5	1102.41	738.595	124.858	60.9094	0.110004	0.0824375	3.04021	2.86723	0.0476306	0.0357416	-0.574623	-1.73959	-6.66939	0.00026711	-1	0	0	0	0	1
sp|O14874-2|BCKD_HUMAN	O14874-2	sp|O14874-2|BCKD_HUMAN	>sp|O14874-2|BCKD_HUMAN Isoform of O14874, Isoform 2 of [3-methyl-2-oxobutanoate dehydrogenase [lipoamide]] kinase, mitochondrial OS=Homo sapiens GN=BCKDK	BCKDK	BCKDK	10295	1	86.7733	65.4799	76.9752	51.4051	89.0555	90.0293	88.6656	80.7469	85.6055	100.253	1.28453e-06	0.00516031	8.2709e-07	0.0004188	4.68448e-06	4.03214e-09	1.16101e-07	6.09396e-06	6.4024e-08	2.92484e-08	5	5	73.9378	89.06	15.6667	7.20092	0.230341	0.0796339	1.8603	1.94857	0.0987459	0.0345299	0.293227	1.05293	2.10405	0.0979728	0	1	0	0	0	0
sp|Q9Y276|BCS1_HUMAN	Q9Y276	sp|Q9Y276|BCS1_HUMAN	>sp|Q9Y276|BCS1_HUMAN Mitochondrial chaperone BCS1 OS=Homo sapiens GN=BCS1L PE=1 SV=1	BCS1L	BCS1L	617	2	345.953	254.072	252.672	325.6	326.603	327.296	324.414	342.375	350.119	393.161	9.96419e-07	0.000100794	4.51976e-05	2.26604e-06	7.75399e-06	8.51723e-08	2.89851e-08	2.37189e-07	5.84714e-05	1.12464e-07	5	5	300.98	347.473	44.2132	27.6552	0.15183	0.0772522	2.47465	2.53987	0.0655634	0.0335003	0.216653	1.08838	2.11793	0.0961543	0	1	0	0	0	0
tr|E9PCG9|E9PCG9_HUMAN	E9PCG9	tr|E9PCG9|E9PCG9_HUMAN	>tr|E9PCG9|E9PCG9_HUMAN Isoform of Q02338, D-beta-hydroxybutyrate dehydrogenase, mitochondrial OS=Homo sapiens GN=BDH1 PE=1 SV=1	BDH1	BDH1	622	1	1554.52	1629.28	1836.49	1575.91	1856.8	812.664	870.958	853.031	960.143	782.912	5.41084e-06	1.19885e-05	8.32623e-09	2.65063e-07	3.85575e-06	4.65009e-07	2.22882e-06	6.60046e-06	3.77355e-07	9.26314e-08	5	5	1690.6	855.942	145.204	67.6355	0.085218	0.0777819	3.22678	2.93138	0.0369428	0.0337293	-0.981269	-1.85528	-12.9629	3.70639e-06	-1	0	0	0	0	0
sp|Q9BUH8|BEGIN_HUMAN	Q9BUH8	sp|Q9BUH8|BEGIN_HUMAN	>sp|Q9BUH8|BEGIN_HUMAN Brain-enriched guanylate kinase-associated protein OS=Homo sapiens GN=BEGAIN PE=1 SV=1	BEGAIN	BEGAIN	57596	1	38.2813	68.7084	52.1209	45.3803	57.1335	33.7665	40.7935	57.5109	35.3405	42.0591	1.38645e-06	5.52356e-06	6.34125e-08	5.11011e-05	1.74027e-07	0.000172311	0.000215987	4.90373e-06	6.35206e-07	0.000789674	5	5	52.3249	41.8941	11.587	9.40917	0.225236	0.211399	1.71015	1.61419	0.0966111	0.090808	-0.318776	-0.942283	-1.83472	0.144386	0	0	0	0	0	0
sp|O00499-3|BIN1_HUMAN	O00499-3	sp|O00499-3|BIN1_HUMAN	>sp|O00499-3|BIN1_HUMAN Isoform of O00499, Isoform IIC1 of Myc box-dependent-interacting protein 1 OS=Homo sapiens GN=BIN1	BIN1	BIN1	274	7	5592.68	6054.59	5574.46	6005.26	5713.24	6836.56	6702.71	5910.39	6661.27	6278.33	2.27596e-08	7.74904e-09	3.06195e-10	2.57736e-08	1.15185e-08	2.40633e-08	3.62774e-09	4.05456e-09	3.84671e-09	5.52344e-08	5	5	5788.04	6477.85	227.821	379.046	0.0392075	0.0596821	3.76226	3.81082	0.0170211	0.0258966	0.161302	1.47634	2.83872	0.0332632	0	1	0	0	1	0
tr|K7ESE8|K7ESE8_HUMAN	K7ESE8	tr|K7ESE8|K7ESE8_HUMAN	>tr|K7ESE8|K7ESE8_HUMAN Isoform of Q13867, Bleomycin hydrolase (Fragment) OS=Homo sapiens GN=BLMH PE=1 SV=1	BLMH	BLMH	642	1	90.1299	114.943	92.0604	105.522	95.7675	63.1354	74.8415	97.1377	87.6152	66.3698	1.1096e-07	3.60374e-08	4.26871e-09	1.66977e-06	1.5279e-09	0.000500557	0.000116795	0.000174456	3.47843e-06	0.0299953	5	5	99.6847	77.8199	10.3883	14.3591	0.102154	0.183806	1.9968	1.88527	0.0442499	0.0791637	-0.370484	-1.32259	-3.02369	0.025528	0	0	0	0	0	0
sp|Q13873|BMPR2_HUMAN	Q13873	sp|Q13873|BMPR2_HUMAN	>sp|Q13873|BMPR2_HUMAN Bone morphogenetic protein receptor type-2 OS=Homo sapiens GN=BMPR2 PE=1 SV=2	BMPR2	BMPR2	659	1	106.196	109.397	97.8265	101.43	99.9301	68.7189	65.2458	64.2799	63.8063	69.2313	6.51969e-06	6.95786e-08	2.41143e-08	9.26442e-10	6.15948e-09	1.80551e-06	5.43961e-07	0.00177356	3.77355e-07	1.10947e-07	5	5	102.956	66.2564	4.73764	2.5419	0.0457501	0.0381987	2.01229	1.82097	0.0198586	0.0165834	-0.635527	-1.8702	-12.1041	4.56591e-06	-1	0	0	0	0	0
sp|O95861-4|BPNT1_HUMAN	O95861-4	sp|O95861-4|BPNT1_HUMAN	>sp|O95861-4|BPNT1_HUMAN Isoform of O95861, Isoform 4 of 3'(2'),5'-bisphosphate nucleotidase 1 OS=Homo sapiens GN=BPNT1	BPNT1	BPNT1	10380	4	629.985	607.285	624.937	662.148	589.977	705.449	611.313	859.131	661.175	575.285	8.44413e-08	6.42499e-08	3.34812e-10	2.49163e-08	8.74868e-08	8.57159e-09	1.16742e-08	4.57711e-09	6.44773e-08	4.98925e-09	5	5	622.866	682.47	27.0302	110.389	0.0432125	0.15579	2.79407	2.8298	0.0187582	0.0672537	0.118685	0.711544	1.21267	0.327368	0	1	0	0	0	0
sp|O60477|BRNP1_HUMAN	O60477	sp|O60477|BRNP1_HUMAN	>sp|O60477|BRNP1_HUMAN BMP/retinoic acid-inducible neural-specific protein 1 OS=Homo sapiens GN=BRINP1 PE=1 SV=2	BRINP1	BRINP1	1620	5	762.702	786.971	719.052	633.019	707.545	471.799	483.616	542.692	608.411	446.561	1.20832e-07	2.45653e-07	4.90678e-09	2.28314e-07	2.81021e-07	1.39245e-05	5.06882e-07	3.35059e-07	6.77345e-06	1.737e-06	5	5	721.858	510.616	59.1886	65.0606	0.0839823	0.124364	2.85725	2.70538	0.036409	0.0538037	-0.504505	-1.66875	-5.46664	0.000986381	-1	0	0	0	0	0
sp|Q8WUW1|BRK1_HUMAN	Q8WUW1	sp|Q8WUW1|BRK1_HUMAN	>sp|Q8WUW1|BRK1_HUMAN Protein BRICK1 OS=Homo sapiens GN=BRK1 PE=1 SV=1	BRK1	BRK1	55845	2	909.736	798.822	807.067	918.578	755.187	608.219	613.664	751.434	668.162	596.761	3.3883e-08	2.65671e-06	5.1324e-10	6.0505e-09	5.05388e-08	9.7301e-07	1.96765e-07	5.52992e-08	3.56602e-08	7.89284e-08	5	5	837.878	647.648	72.4372	64.2096	0.0862712	0.0957984	2.92189	2.80971	0.0373977	0.0415098	-0.372642	-1.60534	-4.54081	0.00300716	-1	0	0	0	0	0
sp|Q8TDC3|BRSK1_HUMAN	Q8TDC3	sp|Q8TDC3|BRSK1_HUMAN	>sp|Q8TDC3|BRSK1_HUMAN Serine/threonine-protein kinase BRSK1 OS=Homo sapiens GN=BRSK1 PE=1 SV=2	BRSK1	BRSK1	84446	1	87.0305	134.344	119.654	125.109	113.208	125.932	123.889	140.689	107.843	114.176	0.0049852	2.77179e-05	4.46616e-05	7.94493e-07	7.07747e-06	3.86417e-05	1.84007e-06	1.29958e-05	3.29145e-07	5.15851e-06	5	5	115.869	122.506	17.8871	12.5365	0.16752	0.101705	2.0594	2.08636	0.0722504	0.0440565	0.089568	0.463453	0.777027	0.540485	0	1	0	0	0	0
sp|Q8IWQ3-4|BRSK2_HUMAN	Q8IWQ3-4	sp|Q8IWQ3-4|BRSK2_HUMAN	>sp|Q8IWQ3-4|BRSK2_HUMAN Isoform of Q8IWQ3, Isoform 4 of Serine/threonine-protein kinase BRSK2 OS=Homo sapiens GN=BRSK2	BRSK2	BRSK2	9024	1	72.9679	85.5722	100.806	102.892	77.4874	66.243	73.6455	73.4711	59.1063	57.8604	3.96616e-06	0.00123787	0.00027589	9.5284e-06	2.99484e-06	6.71734e-06	4.03851e-06	0.00148367	6.73566e-05	2.69261e-06	5	5	87.9451	66.0652	13.4919	7.55122	0.154576	0.115414	1.94011	1.81768	0.0667357	0.0499577	-0.406701	-1.43764	-3.57474	0.0115278	0	0	0	0	0	0
sp|Q9UPA5|BSN_HUMAN	Q9UPA5	sp|Q9UPA5|BSN_HUMAN	>sp|Q9UPA5|BSN_HUMAN Protein bassoon OS=Homo sapiens GN=BSN PE=2 SV=4	BSN	BSN	8927	15	5181.66	4610.97	5035.61	5215.65	5682.21	5264.46	5573.73	5416.09	6092.87	5575.88	1.29171e-08	3.69852e-08	1.44091e-09	1.23152e-08	2.46579e-08	1.83407e-07	3.66223e-09	2.84475e-09	6.17148e-09	2.07553e-08	5	5	5145.22	5584.6	384.734	312.015	0.0751836	0.0548363	3.71043	3.74646	0.0326058	0.0237972	0.11971	1.09406	1.82256	0.146943	0	1	0	0	0	0
tr|F8WD64|F8WD64_HUMAN	F8WD64	tr|F8WD64|F8WD64_HUMAN	>tr|F8WD64|F8WD64_HUMAN Isoform of Q69YW2, Protein stum homolog OS=Homo sapiens GN=C1orf95 PE=1 SV=1	C1ORF95	C1ORF95	375057	2	2413.5	2361.67	2396.2	2176.55	2007.03	1536.28	1477.47	1695.36	1501.11	1632.6	2.10136e-08	1.07722e-07	4.581e-09	2.72738e-08	3.12614e-07	1.40883e-07	2.72047e-07	4.3244e-08	1.41902e-09	1.20297e-08	5	5	2270.99	1568.56	175.217	92.2892	0.0794314	0.0583137	3.35514	3.19491	0.0344424	0.0253038	-0.532286	-1.7978	-7.81939	9.03364e-05	-1	0	0	0	0	0
sp|Q5VWW1|C1QL3_HUMAN	Q5VWW1	sp|Q5VWW1|C1QL3_HUMAN	>sp|Q5VWW1|C1QL3_HUMAN Complement C1q-like protein 3 OS=Homo sapiens GN=C1QL3 PE=2 SV=1	C1QL3	C1QL3	389941	2	196.589	198.971	216.117	204.674	213.337	181.941	149.762	186.279	165.959	170.371	1.08014e-05	1.51471e-07	6.20337e-09	3.26581e-06	8.1673e-08	1.89484e-07	9.33518e-08	1.72925e-06	1.40758e-07	9.13227e-06	5	5	205.938	170.862	8.60094	14.4042	0.0417078	0.0861791	2.31343	2.23138	0.0181056	0.0373579	-0.272581	-1.59813	-4.07857	0.00572261	0	0	0	0	0	0
sp|Q9BXJ3|C1QT4_HUMAN	Q9BXJ3	sp|Q9BXJ3|C1QT4_HUMAN	>sp|Q9BXJ3|C1QT4_HUMAN Complement C1q tumor necrosis factor-related protein 4 OS=Homo sapiens GN=C1QTNF4 PE=1 SV=2	C1QTNF4	C1QTNF4	114900	1	114.078	103.731	99.2104	93.891	131.227	12.9121	116.882	114.102	127.532	115.859	2.75008e-07	3.52858e-06	6.25181e-09	1.71867e-06	4.39415e-06	0.478846	3.30446e-08	9.57935e-07	1.87086e-08	9.65e-06	5	5	108.427	97.4575	14.7483	47.5537	0.132221	1.29482	2.03206	1.88112	0.0571741	0.430923	-0.50143	-0.502279	-0.903228	0.471147	0	0	0	0	0	0
sp|O14523|C2C2L_HUMAN	O14523	sp|O14523|C2C2L_HUMAN	>sp|O14523|C2C2L_HUMAN C2 domain-containing protein 2-like OS=Homo sapiens GN=C2CD2L PE=1 SV=3	C2CD2L	C2CD2L	9854	1	72.2703	80.0695	72.844	68.72	84.8796	106.51	119.142	89.7055	84.2318	111.394	2.07912e-06	1.02916e-05	2.06743e-05	2.87443e-05	1.5205e-05	2.50203e-07	2.07172e-06	1.89785e-06	7.30008e-05	2.10302e-05	5	5	75.7567	102.197	6.55707	14.7404	0.0856136	0.148007	1.87814	2.00572	0.0371136	0.0639307	0.423817	1.53036	4.12912	0.0053153	0	1	0	0	0	0
sp|Q8WWC4|CB047_HUMAN	Q8WWC4	sp|Q8WWC4|CB047_HUMAN	>sp|Q8WWC4|CB047_HUMAN Uncharacterized protein C2orf47, mitochondrial OS=Homo sapiens GN=C2orf47 PE=1 SV=1	C2ORF47	C2ORF47	51614;79568	2	234.207	223.614	241.212	194.099	239.107	232.769	216.429	210.444	245.37	210.687	3.8709e-07	7.66598e-06	5.69824e-05	6.76756e-06	1.09118e-06	1.19092e-07	8.01206e-08	2.18866e-09	4.03382e-07	4.3407e-09	5	5	226.448	223.14	19.3191	15.3963	0.0895585	0.0679898	2.35362	2.34777	0.0388171	0.0294936	-0.0194511	-0.179356	-0.261657	0.846674	0	0	0	0	0	0
sp|C9J069|CI172_HUMAN	C9J069	sp|C9J069|CI172_HUMAN	>sp|C9J069|CI172_HUMAN Uncharacterized protein C9orf172 OS=Homo sapiens GN=C9orf172 PE=3 SV=1	C9ORF172	C9ORF172	389813	2	436.811	373.93	399.228	410.639	460.369	361.003	337.814	379.188	362.087	354.557	1.79317e-09	2.72985e-08	3.82781e-08	2.85206e-09	5.05882e-08	1.42856e-08	4.67174e-09	1.96395e-08	5.13194e-09	4.62095e-08	5	5	416.196	358.93	33.4717	14.9136	0.0805349	0.041697	2.61817	2.55471	0.0349193	0.0181009	-0.21083	-1.49324	-3.26079	0.0183934	0	0	0	0	0	0
sp|Q9H3H3|CK068_HUMAN	Q9H3H3	sp|Q9H3H3|CK068_HUMAN	>sp|Q9H3H3|CK068_HUMAN UPF0696 protein C11orf68 OS=Homo sapiens GN=C11orf68 PE=1 SV=2	C11ORF68	C11ORF68	83638	1	120.621	120.171	95.7101	109.317	102.763	74.0424	109.108	115.224	94.0085	84.1008	5.83033e-07	6.53032e-07	7.37522e-07	1.92368e-05	1.7423e-07	5.18098e-05	0.0043717	0.000148465	5.78165e-08	0.00653372	5	5	109.716	95.2967	10.8731	17.0778	0.100422	0.183871	2.03854	1.97337	0.0435034	0.0791913	-0.216495	-0.939868	-1.77278	0.157273	0	0	0	0	0	0
sp|Q99622|C10_HUMAN	Q99622	sp|Q99622|C10_HUMAN	>sp|Q99622|C10_HUMAN Protein C10 OS=Homo sapiens GN=C12orf57 PE=1 SV=1	C12ORF57	C12ORF57	113246	1	106.778	117.28	109.168	131.23	101.132	102.495	111.507	99.5814	82.6782	108.752	6.12169e-06	5.40304e-06	2.95727e-08	2.7424e-05	3.11647e-05	5.49335e-07	2.0165e-06	2.68973e-05	5.4914e-07	5.6e-07	5	5	113.117	101.003	11.6711	11.2964	0.100774	0.118312	2.05174	2.002	0.0436549	0.0512039	-0.165236	-0.95735	-1.74026	0.16413	0	0	0	0	0	0
sp|Q9Y224|CN166_HUMAN	Q9Y224	sp|Q9Y224|CN166_HUMAN	>sp|Q9Y224|CN166_HUMAN UPF0568 protein C14orf166 OS=Homo sapiens GN=C14orf166 PE=1 SV=1	C14ORF166	C14ORF166	51637	1	73.3063	58.3896	30.8671	57.2793	45.6787	29.0104	44.6333	50.9144	35.4785	29.4484	8.37279e-08	1.50274e-05	1.22895e-05	4.59064e-06	0.000312361	2.20993e-05	9.93668e-07	5.42899e-06	0.000454242	0.0045218	5	5	53.1042	37.897	15.836	9.63106	0.335937	0.254025	1.70774	1.56762	0.142013	0.108602	-0.465472	-0.999355	-2.01208	0.111742	0	0	0	0	0	0
tr|H3BR56|H3BR56_HUMAN	H3BR56	tr|H3BR56|H3BR56_HUMAN	>tr|H3BR56|H3BR56_HUMAN Isoform of Q96MC5, Uncharacterized protein C16orf45 (Fragment) OS=Homo sapiens GN=C16orf45 PE=1 SV=1	C16ORF45	C16ORF45	89927	1	121.521	134.39	133.485	146.16	122.408	143.402	121.658	129.467	129.019	134.011	4.97147e-07	5.02942e-07	3.69795e-09	2.40389e-06	4.75163e-08	1.08794e-07	1.08989e-08	2.17191e-09	3.225e-07	5.25498e-09	5	5	131.593	131.511	10.1167	7.98634	0.0762945	0.060291	2.11822	2.11833	0.0330862	0.0261603	0.000370507	0.00396645	0.00548865	0.997297	0	1	0	0	0	0
sp|Q9BSU1|CP070_HUMAN	Q9BSU1	sp|Q9BSU1|CP070_HUMAN	>sp|Q9BSU1|CP070_HUMAN UPF0183 protein C16orf70 OS=Homo sapiens GN=C16orf70 PE=1 SV=1	C16ORF70	C16ORF70	80262	2	199.254	171.266	191.146	197.922	176.256	205.953	178.685	176.588	154.841	168.745	1.02924e-05	0.000161963	5.18253e-07	7.73383e-05	1.31161e-07	3.93036e-07	5.02103e-07	8.40485e-07	2.22445e-06	1.38425e-08	5	5	187.169	176.963	12.7427	18.7111	0.0689172	0.104098	2.27142	2.24599	0.0298949	0.0450872	-0.084473	-0.660922	-1.05441	0.398317	0	0	0	0	0	0
sp|Q9Y376|CAB39_HUMAN	Q9Y376	sp|Q9Y376|CAB39_HUMAN	>sp|Q9Y376|CAB39_HUMAN Calcium-binding protein 39 OS=Homo sapiens GN=CAB39 PE=1 SV=1	CAB39	CAB39	51719	2	401.688	360.265	293.342	394.836	321.294	372.042	357.512	404.889	380.744	378.756	2.79735e-07	1.45002e-06	3.46236e-07	5.06169e-05	9.3477e-06	3.78177e-07	8.57993e-10	3.21506e-08	2.41329e-09	4.17013e-09	5	5	354.285	378.789	46.7161	17.1991	0.135449	0.0451007	2.54624	2.57804	0.0585577	0.0195771	0.105642	0.715537	1.19196	0.336023	0	1	0	0	0	0
sp|O00555-6|CAC1A_HUMAN;sp|O00555-4|CAC1A_HUMAN	O00555-6;O00555-4	sp|O00555-6|CAC1A_HUMAN;sp|O00555-4|CAC1A_HUMAN	>sp|O00555-6|CAC1A_HUMAN Isoform of O00555, Isoform 6 of Voltage-dependent P/Q-type calcium channel subunit alpha-1A OS=Homo sapiens GN=CACNA1A;>sp|O00555-4|CAC1A_HUMAN Isoform of O00555, Isoform 4 of Voltage-dependent P/Q-type calcium channel subunit alpha-1A OS=Homo sapiens GN=CACNA1A	CACNA1A	CACNA1A	773	2	479.187	368.718	399.754	474.178	396.459	241.638	343.265	365.416	399.085	337.994	8.49712e-08	7.37856e-07	5.93085e-06	4.93116e-08	2.40066e-07	0.00144173	8.21676e-09	5.75771e-08	4.83424e-08	5.21805e-07	5	5	423.659	337.48	49.913	58.7264	0.117424	0.1924	2.62463	2.52231	0.050822	0.0828	-0.339884	-1.21401	-2.60819	0.0471615	0	0	0	0	0	0
tr|B1AQK6|B1AQK6_HUMAN	B1AQK6	tr|B1AQK6|B1AQK6_HUMAN	>tr|B1AQK6|B1AQK6_HUMAN Isoform of Q00975, Voltage-dependent N-type calcium channel subunit alpha-1B OS=Homo sapiens GN=CACNA1B PE=1 SV=1	CACNA1B	CACNA1B	774	5	547.399	392.767	511.269	508.991	503.141	448.234	412.81	445.792	471.124	501.159	1.17389e-07	1.92358e-06	1.22957e-05	6.01227e-07	9.86203e-07	3.46735e-07	2.95572e-07	1.77968e-06	8.96485e-07	3.37535e-07	5	5	492.713	455.824	58.5188	32.7787	0.128138	0.0719615	2.6899	2.6579	0.0554234	0.0312122	-0.106295	-0.701164	-1.17141	0.345008	0	0	0	0	0	0
sp|Q15878-2|CAC1E_HUMAN	Q15878-2	sp|Q15878-2|CAC1E_HUMAN	>sp|Q15878-2|CAC1E_HUMAN Isoform of Q15878, Isoform 2 of Voltage-dependent R-type calcium channel subunit alpha-1E OS=Homo sapiens GN=CACNA1E	CACNA1E	CACNA1E	777	6	1066.34	952.125	955.102	902.821	836.477	597.499	632.407	751.864	744.746	659.55	3.61209e-06	4.31908e-06	2.79125e-06	3.8694e-07	7.65044e-07	5.62292e-05	4.32085e-06	1.41017e-06	8.63352e-07	0.000103351	5	5	942.574	677.213	84.2677	68.5699	0.0890076	0.101445	2.97294	2.82895	0.0385793	0.0439445	-0.478337	-1.68772	-5.6303	0.000812739	-1	0	0	0	0	0
sp|P54289-2|CA2D1_HUMAN	P54289-2	sp|P54289-2|CA2D1_HUMAN	>sp|P54289-2|CA2D1_HUMAN Isoform of P54289, Isoform 2 of Voltage-dependent calcium channel subunit alpha-2/delta-1 OS=Homo sapiens GN=CACNA2D1	CACNA2D1	CACNA2D1	781	16	6073.21	6081.4	5981.68	5430.12	5752.11	4806.54	4615.07	4780.31	4731.09	4707.92	1.91408e-08	2.1388e-08	1.46746e-08	8.10145e-08	2.75224e-08	4.57432e-08	1.56723e-08	5.17696e-08	8.59152e-08	2.91219e-08	5	5	5863.71	4728.18	276.428	74.278	0.0480498	0.0157759	3.76778	3.67465	0.0208557	0.00685095	-0.309355	-1.81826	-6.24653	0.000416446	-1	0	0	0	0	0
sp|Q8IZS8|CA2D3_HUMAN	Q8IZS8	sp|Q8IZS8|CA2D3_HUMAN	>sp|Q8IZS8|CA2D3_HUMAN Voltage-dependent calcium channel subunit alpha-2/delta-3 OS=Homo sapiens GN=CACNA2D3 PE=1 SV=1	CACNA2D3	CACNA2D3	55799	7	1444.98	1544.08	1477.67	1535.48	1508.61	1021.47	1132.64	1203.98	1283.5	1150.76	3.49487e-08	8.08731e-09	4.6084e-09	4.67018e-08	4.12459e-08	1.14511e-07	2.58491e-08	1.11898e-08	1.8654e-08	8.09889e-09	5	5	1502.16	1158.47	41.1665	96.434	0.0275427	0.0843244	3.17659	3.06266	0.0119594	0.0365568	-0.378443	-1.7449	-5.93146	0.000565441	-1	0	0	0	0	0
sp|Q02641|CACB1_HUMAN	Q02641	sp|Q02641|CACB1_HUMAN	>sp|Q02641|CACB1_HUMAN Voltage-dependent L-type calcium channel subunit beta-1 OS=Homo sapiens GN=CACNB1 PE=2 SV=3	CACNB1	CACNB1	782	4	878.98	836.121	807.383	761.941	795.341	697.945	689.355	702.653	737.748	814.457	9.72423e-08	1.14863e-06	1.18423e-08	1.87545e-06	3.92797e-08	1.22932e-08	2.62547e-08	4.06562e-07	4.55958e-07	3.46998e-07	5	5	815.953	728.431	44.1442	51.4978	0.0538498	0.0685825	2.91116	2.86156	0.0233697	0.0297501	-0.164782	-1.36553	-2.60786	0.0471615	0	0	0	0	0	0
sp|Q08289-6|CACB2_HUMAN	Q08289-6	sp|Q08289-6|CACB2_HUMAN	>sp|Q08289-6|CACB2_HUMAN Isoform of Q08289, Isoform 2f of Voltage-dependent L-type calcium channel subunit beta-2 OS=Homo sapiens GN=CACNB2	CACNB2	CACNB2	783	1	152.732	152.199	144.183	124.069	101.483	164.19	192.618	185.542	161.721	221.309	1.3962e-08	4.90417e-08	1.00545e-09	7.86076e-08	2.75426e-06	6.1382e-09	8.44469e-10	6.97492e-09	3.1228e-09	2.7582e-10	5	5	134.933	185.076	22.0081	24.2469	0.175819	0.128867	2.12506	2.26445	0.0757769	0.0557359	0.463035	1.44308	3.6578	0.0102437	0	1	0	0	0	0
sp|P54284-2|CACB3_HUMAN	P54284-2	sp|P54284-2|CACB3_HUMAN	>sp|P54284-2|CACB3_HUMAN Isoform of P54284, Isoform 2 of Voltage-dependent L-type calcium channel subunit beta-3 OS=Homo sapiens GN=CACNB3	CACNB3	CACNB3	784	2	249.085	286.28	270.55	226.014	260.335	190.08	238.803	241.4	225.806	205.915	7.95755e-07	1.22064e-06	4.33168e-07	0.000329016	5.13976e-06	5.07668e-07	1.40322e-06	4.80352e-09	2.33129e-07	1.1885e-06	5	5	258.453	220.401	22.7173	22.0114	0.0894848	0.102422	2.41101	2.34143	0.0387853	0.0443651	-0.23115	-1.29474	-2.70469	0.0408623	0	0	0	0	0	0
sp|O00305-3|CACB4_HUMAN	O00305-3	sp|O00305-3|CACB4_HUMAN	>sp|O00305-3|CACB4_HUMAN Isoform of O00305, Isoform 3 of Voltage-dependent L-type calcium channel subunit beta-4 OS=Homo sapiens GN=CACNB4	CACNB4	CACNB4	785	2	483.973	454.195	428.174	470.776	459.939	333.073	323.484	377.07	358.091	363.49	4.96019e-07	2.76382e-07	4.30655e-09	6.11631e-08	1.69047e-07	0.000137426	4.9805e-07	4.81954e-06	2.92038e-07	0.000853981	5	5	459.411	351.042	20.8308	22.161	0.0458403	0.0636202	2.66184	2.54466	0.0198977	0.027602	-0.389262	-1.78103	-6.53411	0.00030418	-1	0	0	0	0	0
sp|Q9Y698|CCG2_HUMAN	Q9Y698	sp|Q9Y698|CCG2_HUMAN	>sp|Q9Y698|CCG2_HUMAN Voltage-dependent calcium channel gamma-2 subunit OS=Homo sapiens GN=CACNG2 PE=1 SV=1	CACNG2	CACNG2	10369	1	331.458	260.019	307.999	276.739	328.699	268.449	230.709	246.671	230.577	243.065	4.43231e-07	4.36517e-07	6.00466e-08	3.00069e-07	4.24056e-07	7.49366e-09	2.55337e-09	4.42917e-08	6.96271e-10	1.47617e-07	5	5	300.983	243.894	31.6698	15.5123	0.107482	0.0624519	2.47657	2.38652	0.0465451	0.0270961	-0.299153	-1.51316	-3.74638	0.00896381	0	0	0	0	0	0
sp|O60359|CCG3_HUMAN	O60359	sp|O60359|CCG3_HUMAN	>sp|O60359|CCG3_HUMAN Voltage-dependent calcium channel gamma-3 subunit OS=Homo sapiens GN=CACNG3 PE=2 SV=1	CACNG3	CACNG3	10368	1	445.866	384.773	492.345	257.905	554.989	316.308	295.278	402.933	368.964	225.648	3.17483e-09	4.38545e-09	1.15632e-09	1.79016e-09	1.82558e-09	1.33238e-09	1.25121e-09	2.20151e-09	1.89437e-09	3.73124e-09	5	5	427.175	321.826	113.339	68.5306	0.302744	0.227057	2.61648	2.4992	0.128608	0.0973729	-0.389616	-0.945539	-1.85993	0.13943	0	0	0	0	0	0
sp|Q8WXS5|CCG8_HUMAN	Q8WXS5	sp|Q8WXS5|CCG8_HUMAN	>sp|Q8WXS5|CCG8_HUMAN Voltage-dependent calcium channel gamma-8 subunit OS=Homo sapiens GN=CACNG8 PE=2 SV=3	CACNG8	CACNG8	59283	1	235.753	230.079	273.633	264.247	325.412	134.101	193.828	329.566	201.2	191.441	1.99685e-09	5.91217e-07	1.0974e-10	2.60323e-09	4.00023e-09	1.04763e-06	1.74805e-07	4.04133e-08	1.3326e-09	2.72632e-07	5	5	265.825	210.027	38.0661	72.0073	0.139177	0.329374	2.42119	2.30369	0.0601543	0.139378	-0.390323	-0.990323	-1.97515	0.117916	0	0	0	0	0	0
sp|Q9HB71|CYBP_HUMAN	Q9HB71	sp|Q9HB71|CYBP_HUMAN	>sp|Q9HB71|CYBP_HUMAN Calcyclin-binding protein OS=Homo sapiens GN=CACYBP PE=1 SV=2	CACYBP	CACYBP	27101	1	41.4026	71.7135	62.2694	60.8733	48.3035	129.798	112.174	125.688	114.707	106.309	0.0189458	0.00505038	0.122618	0.0300767	0.215669	1.88907e-07	1.49137e-08	6.81057e-07	8.95289e-06	7.75812e-07	5	5	56.9125	117.735	12.0221	9.7391	0.221998	0.0825889	1.74706	2.06972	0.0952552	0.035807	1.07186	1.76231	7.88701	8.64679e-05	1	1	0	0	0	0
tr|A0A087X105|A0A087X105_HUMAN	A0A087X105	tr|A0A087X105|A0A087X105_HUMAN	>tr|A0A087X105|A0A087X105_HUMAN Isoform of Q9BY67, Cell adhesion molecule 1 OS=Homo sapiens GN=CADM1 PE=1 SV=1	CADM1	CADM1	23705	4	3287.36	3383.78	3572.2	3705.1	3914.73	3202.65	2864.64	2962.39	3400.96	3369.14	2.89519e-08	7.32696e-08	9.2017e-10	3.20804e-08	4.69619e-08	9.72242e-08	1.25645e-08	8.02592e-08	5.91715e-09	1.63471e-07	5	5	3572.64	3159.96	250.809	239.744	0.0699832	0.0766938	3.55214	3.49867	0.0303562	0.0332589	-0.17762	-1.2986	-2.52202	0.053668	0	0	0	0	0	0
sp|Q8N3J6-2|CADM2_HUMAN	Q8N3J6-2	sp|Q8N3J6-2|CADM2_HUMAN	>sp|Q8N3J6-2|CADM2_HUMAN Isoform of Q8N3J6, Isoform 2 of Cell adhesion molecule 2 OS=Homo sapiens GN=CADM2	CADM2	CADM2	253559	6	7016.29	8263.76	7030.11	6918.39	6809.85	6349.59	5968.36	6768.12	6781.73	6539.66	8.05191e-08	2.63843e-08	1.82245e-09	3.84234e-09	1.43321e-08	2.88685e-08	2.09147e-08	1.31592e-08	5.70649e-08	1.21563e-08	5	5	7207.68	6481.49	596.954	337.781	0.0790388	0.0530043	3.85668	3.81119	0.0342727	0.0230033	-0.151098	-1.24632	-2.26896	0.077882	0	0	0	0	0	0
sp|Q8N126|CADM3_HUMAN	Q8N126	sp|Q8N126|CADM3_HUMAN	>sp|Q8N126|CADM3_HUMAN Cell adhesion molecule 3 OS=Homo sapiens GN=CADM3 PE=1 SV=1	CADM3	CADM3	57863	1	537.699	1332.88	1359.48	332.933	1574.9	744.498	1341.02	1310.58	1202.85	621.794	5.16502e-09	3.84361e-08	4.58394e-09	9.77195e-10	4.41341e-06	3.14093e-09	6.68859e-09	5.35287e-08	1.68767e-07	1.54627e-09	5	5	1027.58	1044.15	553.498	336.332	0.776531	0.367253	2.94166	2.99812	0.298331	0.154478	0.187561	0.249899	0.436362	0.739734	0	1	0	0	0	0
sp|Q8NFZ8|CADM4_HUMAN	Q8NFZ8	sp|Q8NFZ8|CADM4_HUMAN	>sp|Q8NFZ8|CADM4_HUMAN Cell adhesion molecule 4 OS=Homo sapiens GN=CADM4 PE=1 SV=1	CADM4	CADM4	199731	5	2134.49	2009	2148.45	2076.4	2301.88	1592.56	1630.69	1804.44	1985.32	1588.67	3.41106e-09	1.86593e-08	1.97548e-10	6.34378e-09	4.61004e-09	1.3852e-08	8.66174e-10	5.6451e-09	3.41208e-09	2.47558e-08	5	5	2134.04	1720.34	108.783	172.474	0.0504489	0.0975544	3.32876	3.23393	0.0218958	0.042267	-0.314998	-1.60173	-4.30794	0.00410983	-1	0	0	0	0	0
sp|Q9ULU8|CAPS1_HUMAN	Q9ULU8	sp|Q9ULU8|CAPS1_HUMAN	>sp|Q9ULU8|CAPS1_HUMAN Calcium-dependent secretion activator 1 OS=Homo sapiens GN=CADPS PE=1 SV=3	CADPS	CADPS	8618	24	11409.2	12473.2	12301.4	12138.3	11225.2	11280	11179.9	10979.9	10144.4	9198.52	1.40968e-08	2.88829e-08	1.3339e-09	1.80525e-08	3.15354e-08	2.1177e-08	7.53575e-09	8.63849e-09	4.98914e-09	1.15059e-08	5	5	11909.4	10556.5	557.268	881.083	0.0471647	0.0863822	4.07551	4.02226	0.020472	0.0374456	-0.176892	-1.33245	-2.60098	0.0476924	0	0	0	0	0	0
sp|P05937|CALB1_HUMAN	P05937	sp|P05937|CALB1_HUMAN	>sp|P05937|CALB1_HUMAN Calbindin OS=Homo sapiens GN=CALB1 PE=1 SV=2	CALB1	CALB1	793	3	687.538	655.418	675.894	753.074	699.639	762.14	676.191	767.345	665.123	611.827	1.27372e-07	3.59844e-07	7.92133e-09	2.97986e-07	3.66596e-09	1.65057e-08	7.37982e-07	2.9754e-09	5.10183e-07	4.57817e-06	5	5	694.313	696.525	36.6717	66.8845	0.0519847	0.0966987	2.84108	2.84133	0.0225615	0.041898	0.000810541	0.00769112	0.0110875	0.9945	0	1	0	0	0	0
tr|H3BN14|H3BN14_HUMAN	H3BN14	tr|H3BN14|H3BN14_HUMAN	>tr|H3BN14|H3BN14_HUMAN Isoform of P22676, Calretinin (Fragment) OS=Homo sapiens GN=CALB2 PE=1 SV=2	CALB2	CALB2	794	2	312.277	312.099	322.016	360.024	403.39	299.228	260.896	182.927	217.375	223.929	1.63074e-08	2.44705e-08	4.17453e-10	6.57967e-08	2.10023e-07	1.18469e-07	6.00059e-09	2.10478e-06	3.71977e-08	9.22341e-09	5	5	341.961	236.871	39.5933	44.5057	0.112175	0.188921	2.53175	2.36841	0.0485648	0.0813289	-0.542602	-1.52988	-4.25963	0.00438913	-1	0	0	0	0	0
sp|Q9P1Z2-2|CACO1_HUMAN	Q9P1Z2-2	sp|Q9P1Z2-2|CACO1_HUMAN	>sp|Q9P1Z2-2|CACO1_HUMAN Isoform of Q9P1Z2, Isoform 2 of Calcium-binding and coiled-coil domain-containing protein 1 OS=Homo sapiens GN=CALCOCO1	CALCOCO1	CALCOCO1	57658	1	71.4175	77.3042	68.2374	69.1233	49.1613	96.9488	91.7135	84.9897	72.8165	88.4298	4.12089e-05	6.9638e-05	0.00102616	0.000939623	0.013643	4.22391e-07	3.74769e-08	1.08753e-08	0.000185539	4.06004e-07	5	5	67.0487	86.9797	10.6059	9.0616	0.175343	0.108572	1.82146	1.93743	0.0755747	0.0470142	0.385273	1.36142	3.19717	0.0201279	0	1	0	0	0	0
sp|P62158|CALM_HUMAN	P62158	sp|P62158|CALM_HUMAN	>sp|P62158|CALM_HUMAN Calmodulin OS=Homo sapiens GN=CALM1 PE=1 SV=2	CALM1	CALM1	801	5	39775.5	46768.9	43283.8	44624.9	38902.3	52475.7	55296.4	52325.6	44094	57246.2	1.18659e-07	9.14962e-07	1.57761e-08	2.16941e-07	6.04265e-07	2.35715e-07	1.58502e-07	4.26163e-08	1.12642e-07	3.54958e-07	5	5	42671.1	52287.6	3300.48	5020.29	0.0776978	0.100658	4.62909	4.7167	0.033693	0.0436052	0.29103	1.48476	3.58321	0.01139	0	1	0	0	0	0
sp|P27797|CALR_HUMAN	P27797	sp|P27797|CALR_HUMAN	>sp|P27797|CALR_HUMAN Calreticulin OS=Homo sapiens GN=CALR PE=1 SV=1	CALR	CALR	811	1	94.7873	102.524	60.0137	153.642	52.004	49.4402	17.7907	59.7246	13.5072	51.3139	4.3541e-08	8.69821e-05	1.28991e-07	1.0793e-08	1.02741e-05	3.13461e-05	0.531278	8.76048e-05	0.510184	0.00092257	5	5	92.5943	38.3553	40.4331	21.1411	0.457284	0.776882	1.93367	1.51225	0.189247	0.298439	-1.39996	-1.30157	-3.09772	0.0229353	0	0	0	0	0	0
sp|Q8IU85-2|KCC1D_HUMAN	Q8IU85-2	sp|Q8IU85-2|KCC1D_HUMAN	>sp|Q8IU85-2|KCC1D_HUMAN Isoform of Q8IU85, Isoform 2 of Calcium/calmodulin-dependent protein kinase type 1D OS=Homo sapiens GN=CAMK1D	CAMK1D	CAMK1D	57118	3	964.014	1060.41	1042.56	988.326	874.01	748.214	891.072	871.995	731.849	721.075	9.5721e-08	1.59871e-08	1.56432e-07	5.01086e-09	1.36869e-07	7.27427e-09	1.71418e-09	1.40834e-07	6.69163e-09	9.51872e-09	5	5	985.866	792.841	73.7689	81.8178	0.076639	0.101971	2.99282	2.89737	0.0332352	0.0441708	-0.317061	-1.53059	-3.89462	0.0073153	0	0	0	0	0	0
sp|Q9UQM7|KCC2A_HUMAN;sp|Q9UQM7-2|KCC2A_HUMAN	Q9UQM7;Q9UQM7-2	sp|Q9UQM7|KCC2A_HUMAN;sp|Q9UQM7-2|KCC2A_HUMAN	>sp|Q9UQM7|KCC2A_HUMAN Calcium/calmodulin-dependent protein kinase type II subunit alpha OS=Homo sapiens GN=CAMK2A PE=1 SV=2;>sp|Q9UQM7-2|KCC2A_HUMAN Isoform of Q9UQM7, Isoform B of Calcium/calmodulin-dependent protein kinase type II subunit alpha OS=Homo sapiens GN=CAMK2A	CAMK2A	CAMK2A	815	6	24309.3	28359.7	23849.7	33687.1	20480.3	45412.5	48856.1	50750.9	40727.9	54696.6	1.2423e-07	2.86514e-07	8.97864e-07	2.49704e-07	8.62612e-07	1.18748e-06	5.03081e-08	2.47663e-07	3.53653e-07	2.2498e-07	5	5	26137.2	48088.8	5062.48	5307.64	0.190865	0.112702	4.41095	4.67988	0.0821514	0.0487913	0.893355	1.73063	6.95895	0.000194238	1	1	0	0	0	0
sp|Q13554|KCC2B_HUMAN;sp|Q13554-2|KCC2B_HUMAN;sp|Q13554-3|KCC2B_HUMAN;sp|Q13554-7|KCC2B_HUMAN	Q13554;Q13554-2;Q13554-3;Q13554-7	sp|Q13554|KCC2B_HUMAN;sp|Q13554-2|KCC2B_HUMAN;sp|Q13554-3|KCC2B_HUMAN;sp|Q13554-7|KCC2B_HUMAN	>sp|Q13554|KCC2B_HUMAN Calcium/calmodulin-dependent protein kinase type II subunit beta OS=Homo sapiens GN=CAMK2B PE=1 SV=3;>sp|Q13554-2|KCC2B_HUMAN Isoform of Q13554, Isoform 1 of Calcium/calmodulin-dependent protein kinase type II subunit beta OS=Homo sapiens GN=CAMK2B;>sp|Q13554-3|KCC2B_HUMAN Isoform of Q13554, Isoform 2 of Calcium/calmodulin-dependent protein kinase type II subunit beta OS=Ho…	CAMK2B	CAMK2B	816	5	3651.39	4110.14	3779.55	5365.71	3770.51	8303.03	8922.44	8609.48	7421.09	8857.29	1.80787e-08	1.00073e-07	1.05325e-08	3.02104e-08	1.96933e-07	8.95755e-07	2.77796e-09	1.10845e-08	6.61814e-08	3.75649e-08	5	5	4135.46	8422.66	708.58	610.542	0.158656	0.0751787	3.61196	3.92449	0.0684758	0.0326037	1.03822	1.81384	9.89847	1.8182e-05	1	1	0	0	0	0
sp|Q13557-5|KCC2D_HUMAN;tr|E9PBG7|E9PBG7_HUMAN	Q13557-5;E9PBG7	sp|Q13557-5|KCC2D_HUMAN;tr|E9PBG7|E9PBG7_HUMAN	>sp|Q13557-5|KCC2D_HUMAN Isoform of Q13557, Isoform Delta 8 of Calcium/calmodulin-dependent protein kinase type II subunit delta OS=Homo sapiens GN=CAMK2D;>tr|E9PBG7|E9PBG7_HUMAN Isoform of Q13557, Calcium/calmodulin-dependent protein kinase type II subunit delta OS=Homo sapiens GN=CAMK2D PE=1 SV=1	CAMK2D	CAMK2D	817	2	200.938	190.146	194.439	247.139	195.103	265.005	190.718	170.014	168.795	217.842	9.58165e-08	1.03799e-06	1.40615e-07	1.67107e-07	3.89444e-08	1.19656e-06	5.84913e-07	6.05405e-07	8.99055e-06	3.04428e-08	5	5	205.553	202.475	23.563	40.226	0.107817	0.191386	2.31083	2.29993	0.0466891	0.0823714	-0.0362118	-0.171984	-0.284391	0.83375	0	0	0	0	0	0
tr|Q5SWX3|Q5SWX3_HUMAN;sp|Q13555-5|KCC2G_HUMAN;sp|Q13555-6|KCC2G_HUMAN	Q5SWX3;Q13555-5;Q13555-6	tr|Q5SWX3|Q5SWX3_HUMAN;sp|Q13555-5|KCC2G_HUMAN;sp|Q13555-6|KCC2G_HUMAN	>tr|Q5SWX3|Q5SWX3_HUMAN Isoform of Q13555, Calcium/calmodulin-dependent protein kinase (CaM kinase) II gamma, isoform CRA_n OS=Homo sapiens GN=CAMK2G PE=1 SV=1;>sp|Q13555-5|KCC2G_HUMAN Isoform of Q13555, Isoform 5 of Calcium/calmodulin-dependent protein kinase type II subunit gamma OS=Homo sapiens GN=CAMK2G;>sp|Q13555-6|KCC2G_HUMAN Isoform of Q13555, Isoform 6 of Calcium/calmodulin-dependent prot…	CAMK2G	CAMK2G	818	6	954.059	994.59	992.763	1368.45	1100.61	2015.28	2013.07	1902.18	1658.67	1982.41	3.43399e-06	8.7851e-07	1.64833e-08	2.5782e-08	4.1609e-08	7.23528e-09	5.92265e-09	3.34823e-08	7.50394e-09	9.76339e-09	5	5	1082.09	1914.32	169.094	150.069	0.146901	0.0822161	3.03039	3.28088	0.0634581	0.0356459	0.832127	1.78089	8.21343	6.61528e-05	1	1	0	0	0	0
sp|Q16566|KCC4_HUMAN	Q16566	sp|Q16566|KCC4_HUMAN	>sp|Q16566|KCC4_HUMAN Calcium/calmodulin-dependent protein kinase type IV OS=Homo sapiens GN=CAMK4 PE=1 SV=1	CAMK4	CAMK4	814	1	143.396	171.055	172.681	189.538	144.355	218.228	187.3	162.452	165.963	205.622	8.79364e-06	3.11171e-08	2.12098e-08	4.84771e-06	0.000313941	5.4456e-05	1.68618e-06	2.79679e-06	2.12332e-06	3.57263e-06	5	5	164.205	187.913	19.9222	24.3056	0.122495	0.129862	2.21281	2.27105	0.0530009	0.0561626	0.193474	0.971689	1.8165	0.14813	0	1	0	0	0	0
sp|Q96RR4-2|KKCC2_HUMAN	Q96RR4-2	sp|Q96RR4-2|KKCC2_HUMAN	>sp|Q96RR4-2|KKCC2_HUMAN Isoform of Q96RR4, Isoform 2 of Calcium/calmodulin-dependent protein kinase kinase 2 OS=Homo sapiens GN=CAMKK2	CAMKK2	CAMKK2	10645	2	124.243	90.5722	60.7243	133.539	144.374	183.093	191.76	195.047	143.817	170.692	0.00282972	0.0314167	0.134163	0.0100562	0.052014	1.1844e-06	2.63624e-05	2.56001e-06	4.49448e-06	0.000552323	5	5	110.691	176.882	34.43	20.7456	0.368402	0.124157	2.02395	2.24512	0.154932	0.0537148	0.73472	1.38398	3.45244	0.0138958	0	1	0	0	0	0
sp|Q8NCB2-3|CAMKV_HUMAN;sp|Q8NCB2|CAMKV_HUMAN	Q8NCB2-3;Q8NCB2	sp|Q8NCB2-3|CAMKV_HUMAN;sp|Q8NCB2|CAMKV_HUMAN	>sp|Q8NCB2-3|CAMKV_HUMAN Isoform of Q8NCB2, Isoform 3 of CaM kinase-like vesicle-associated protein OS=Homo sapiens GN=CAMKV;>sp|Q8NCB2|CAMKV_HUMAN CaM kinase-like vesicle-associated protein OS=Homo sapiens GN=CAMKV PE=2 SV=2	CAMKV	CAMKV	79012	10	9921.89	9458.85	9150.35	8576.57	7928.49	4147.77	4046.85	4954.11	4737.67	3966.58	4.42543e-08	1.01157e-07	5.0686e-09	5.04106e-08	1.65548e-08	1.79307e-06	3.61127e-07	7.72786e-08	2.17897e-07	1.41095e-06	5	5	9007.23	4370.6	776.239	445.228	0.0876651	0.100495	3.95327	3.63878	0.0379996	0.0435349	-1.04474	-1.84811	-12.4096	4.04672e-06	-1	0	0	0	0	0
sp|P49069|CAMLG_HUMAN	P49069	sp|P49069|CAMLG_HUMAN	>sp|P49069|CAMLG_HUMAN Calcium signal-modulating cyclophilin ligand OS=Homo sapiens GN=CAMLG PE=1 SV=1	CAMLG	CAMLG	819	1	1407.39	1171.89	1321.51	1079.49	1385.16	1056.28	1007.86	1095.63	1184.33	1293.53	3.33494e-08	2.34224e-08	7.60427e-09	1.98565e-08	3.89977e-08	2.65588e-08	3.30108e-09	2.24974e-09	5.62052e-09	7.17232e-10	5	5	1273.09	1127.52	142.008	113.134	0.114952	0.0988243	3.10262	3.05042	0.0497593	0.0428146	-0.173405	-1.00983	-1.86329	0.138872	0	0	0	0	0	0
sp|Q86VP6|CAND1_HUMAN	Q86VP6	sp|Q86VP6|CAND1_HUMAN	>sp|Q86VP6|CAND1_HUMAN Cullin-associated NEDD8-dissociated protein 1 OS=Homo sapiens GN=CAND1 PE=1 SV=2	CAND1	CAND1	55832	21	6735.92	7146.84	7525.21	7867.72	7936.76	7894.46	7700.12	7583.09	7492.45	6563.42	1.53411e-08	2.60444e-08	9.67029e-10	1.99355e-08	4.87784e-08	8.07554e-09	2.62904e-09	1.25069e-08	2.39661e-09	2.72033e-09	5	5	7442.49	7446.71	504.634	516.135	0.0688559	0.0722344	3.8709	3.87108	0.0298684	0.0313302	0.000596978	0.0062274	0.00869825	0.995842	0	1	0	0	0	0
sp|P27824|CALX_HUMAN	P27824	sp|P27824|CALX_HUMAN	>sp|P27824|CALX_HUMAN Calnexin OS=Homo sapiens GN=CANX PE=1 SV=2	CANX	CANX	821	3	1704.95	1612.73	1624.01	1650.9	1621.87	1876.36	1682.31	1699.46	1736.13	2035.08	2.76874e-09	9.01663e-09	6.07395e-10	2.83548e-08	3.0411e-09	2.28402e-09	4.15217e-10	1.62713e-09	1.0148e-09	1.44928e-09	5	5	1642.89	1805.87	37.4966	149.131	0.0225925	0.0807111	3.21552	3.25554	0.00981056	0.0349955	0.132944	1.24579	2.15276	0.0913654	0	1	0	0	0	0
sp|Q01518-2|CAP1_HUMAN	Q01518-2	sp|Q01518-2|CAP1_HUMAN	>sp|Q01518-2|CAP1_HUMAN Isoform of Q01518, Isoform 2 of Adenylyl cyclase-associated protein 1 OS=Homo sapiens GN=CAP1	CAP1	CAP1	10487	4	1310.09	1378.1	1443.61	1360.49	1264.47	1396.56	1317.76	1523.87	1338.78	1315.82	8.95416e-09	6.50529e-09	4.61092e-10	1.98688e-09	5.81337e-09	1.04964e-07	2.60934e-09	8.97991e-09	4.68856e-09	1.27759e-07	5	5	1351.35	1378.56	68.1186	87.5428	0.0504376	0.0618264	3.13033	3.13875	0.0218909	0.0268252	0.0279799	0.358332	0.465326	0.722892	0	1	0	0	0	0
sp|P40123|CAP2_HUMAN	P40123	sp|P40123|CAP2_HUMAN	>sp|P40123|CAP2_HUMAN Adenylyl cyclase-associated protein 2 OS=Homo sapiens GN=CAP2 PE=1 SV=1	CAP2	CAP2	10486	4	799.238	795.15	826.838	763.24	775.61	1370.69	1359.31	1348.62	1189.23	1257.82	5.50453e-06	1.39779e-07	5.65729e-08	9.63613e-06	1.73665e-07	8.56204e-09	2.45146e-09	7.80119e-09	1.58505e-09	3.21954e-08	5	5	792.015	1305.13	24.3502	78.7325	0.0306519	0.0615623	2.89857	3.11501	0.0133088	0.0267109	0.718986	1.86915	12.881	3.8025e-06	1	1	0	0	0	0
sp|P07384|CAN1_HUMAN	P07384	sp|P07384|CAN1_HUMAN	>sp|P07384|CAN1_HUMAN Calpain-1 catalytic subunit OS=Homo sapiens GN=CAPN1 PE=1 SV=1	CAPN1	CAPN1	823	1	82.4304	94.0848	99.6803	76.6664	73.4506	32.9626	80.8953	48.1621	53.8125	104.257	6.0468e-07	3.81391e-05	4.42107e-08	0.000418312	6.86731e-06	0.000702647	0.0889782	0.475111	0.248374	0.0119998	5	5	85.2625	64.0179	11.2599	28.3902	0.131461	0.474518	1.92776	1.77153	0.0568485	0.195711	-0.519003	-0.983407	-1.97516	0.117916	0	0	0	0	0	0
sp|P17655|CAN2_HUMAN	P17655	sp|P17655|CAN2_HUMAN	>sp|P17655|CAN2_HUMAN Calpain-2 catalytic subunit OS=Homo sapiens GN=CAPN2 PE=1 SV=6	CAPN2	CAPN2	824	2	380.118	389.647	392.416	379.586	412.73	493.69	467.175	481.993	509.135	442.443	1.92908e-07	8.54713e-09	9.68678e-08	2.38333e-06	7.94484e-07	3.08532e-08	3.48561e-07	9.8346e-08	1.49927e-07	2.41138e-07	5	5	390.899	478.887	13.4597	25.5396	0.0340028	0.0538716	2.59186	2.67973	0.014763	0.0233792	0.2919	1.76286	5.41007	0.00103614	1	1	0	0	0	0
tr|K7EIV0|K7EIV0_HUMAN	K7EIV0	tr|K7EIV0|K7EIV0_HUMAN	>tr|K7EIV0|K7EIV0_HUMAN Isoform of P04632, Calpain small subunit 1 (Fragment) OS=Homo sapiens GN=CAPNS1 PE=1 SV=2	CAPNS1	CAPNS1	826	4	631.485	641.157	627.674	657.669	607.944	717.389	686.948	656.586	697.989	645.345	3.0494e-05	6.33422e-06	3.9179e-06	7.57628e-06	2.35394e-05	1.06196e-06	3.24701e-06	2.72348e-05	2.73724e-06	7.3701e-06	5	5	633.186	680.851	18.2579	29.645	0.0288759	0.0436458	2.80139	2.83272	0.0125381	0.0189461	0.104094	1.39835	2.07847	0.101598	0	1	0	0	0	0
sp|P52907|CAZA1_HUMAN	P52907	sp|P52907|CAZA1_HUMAN	>sp|P52907|CAZA1_HUMAN F-actin-capping protein subunit alpha-1 OS=Homo sapiens GN=CAPZA1 PE=1 SV=3	CAPZA1	CAPZA1	829	2	311.604	314.934	292.276	185.817	304.976	507.37	485.502	453.378	420.753	447.093	5.1021e-06	1.55168e-05	7.42678e-06	9.70241e-05	3.90678e-06	1.32118e-08	1.11067e-08	1.43119e-07	9.63775e-10	2.79853e-06	5	5	281.921	462.819	54.4191	33.9313	0.227516	0.073264	2.44219	2.66448	0.0975648	0.0317756	0.738421	1.63851	5.39271	0.00105132	1	1	0	0	0	0
sp|P47755|CAZA2_HUMAN	P47755	sp|P47755|CAZA2_HUMAN	>sp|P47755|CAZA2_HUMAN F-actin-capping protein subunit alpha-2 OS=Homo sapiens GN=CAPZA2 PE=1 SV=3	CAPZA2	CAPZA2	830	7	3508.5	3618.72	3293.38	3132.28	3120.89	2679.51	2655.1	3045.06	2611.36	2616.67	1.46179e-08	2.46386e-07	1.74522e-08	3.28677e-08	4.56613e-08	1.41553e-08	2.9392e-09	3.51538e-08	6.24877e-09	8.06179e-08	5	5	3334.75	2721.54	223.197	183.017	0.0666217	0.0646943	3.52229	3.43407	0.0289014	0.028067	-0.293065	-1.64297	-4.46725	0.00331839	-1	0	0	0	0	0
tr|B1AK87|B1AK87_HUMAN;sp|P47756|CAPZB_HUMAN	B1AK87;P47756	tr|B1AK87|B1AK87_HUMAN;sp|P47756|CAPZB_HUMAN	>tr|B1AK87|B1AK87_HUMAN Isoform of P47756, Capping protein (Actin filament) muscle Z-line, beta, isoform CRA_a OS=Homo sapiens GN=CAPZB PE=1 SV=1;>sp|P47756|CAPZB_HUMAN F-actin-capping protein subunit beta OS=Homo sapiens GN=CAPZB PE=1 SV=4	CAPZB	CAPZB	832	10	7644.3	8051.56	7444.62	7584.05	6687.5	6820.53	6611.95	7591.19	6580.7	5963.14	1.30565e-08	1.41153e-08	6.06171e-10	7.57665e-09	5.7471e-09	1.55562e-08	1.41025e-09	2.74444e-09	1.77365e-09	3.09981e-09	5	5	7482.41	6713.5	498.442	585.829	0.0683402	0.086737	3.87325	3.82564	0.0296452	0.0375988	-0.158138	-1.17251	-2.15404	0.091283	0	0	0	0	0	0
sp|O14936-4|CSKP_HUMAN	O14936-4	sp|O14936-4|CSKP_HUMAN	>sp|O14936-4|CSKP_HUMAN Isoform of O14936, Isoform 4 of Peripheral plasma membrane protein CASK OS=Homo sapiens GN=CASK	CASK	CASK	8573	8	1775.01	1577.31	1710.64	1634.21	1779.65	2188.82	1913.39	1863.16	2129.28	1987.16	4.64098e-08	7.86146e-08	8.06797e-09	3.21056e-08	5.21743e-09	6.47262e-09	1.33198e-08	1.35257e-08	1.91841e-09	3.71694e-09	5	5	1695.36	2016.36	88.5409	139.122	0.0527038	0.0688037	3.22878	3.30375	0.0228731	0.0298458	0.24902	1.60208	3.9549	0.00673211	0	1	0	0	0	0
sp|Q8WXD9|CSKI1_HUMAN	Q8WXD9	sp|Q8WXD9|CSKI1_HUMAN	>sp|Q8WXD9|CSKI1_HUMAN Caskin-1 OS=Homo sapiens GN=CASKIN1 PE=1 SV=1	CASKIN1	CASKIN1	57524	8	1771.43	1685.14	1863.64	1846.12	1826.23	1692.31	1603.14	1518.37	1606.78	1845.15	3.40116e-08	1.78987e-07	2.36156e-08	1.49953e-07	2.4446e-07	5.75653e-08	2.1593e-07	9.55128e-08	2.22488e-06	1.99002e-08	5	5	1798.51	1653.15	72.2225	123.71	0.04079	0.0735569	3.25463	3.21736	0.0177075	0.0319023	-0.123788	-1.19192	-2.00009	0.113479	0	0	0	0	0	0
sp|P04040|CATA_HUMAN	P04040	sp|P04040|CATA_HUMAN	>sp|P04040|CATA_HUMAN Catalase OS=Homo sapiens GN=CAT PE=1 SV=3	CAT	CAT	847	1	182.517	134.877	169.55	185.859	218.366	226.396	206.154	185.752	310.665	234.655	2.06582e-06	8.68511e-05	3.619e-08	1.92997e-06	8.83303e-09	2.4935e-07	0.0027939	5.06205e-05	3.14217e-08	1.01531e-07	5	5	178.234	232.724	30.1759	47.5153	0.176733	0.194547	2.24578	2.36014	0.0761648	0.083707	0.379902	1.18426	2.53566	0.0525429	0	1	0	0	0	0
sp|P16152|CBR1_HUMAN	P16152	sp|P16152|CBR1_HUMAN	>sp|P16152|CBR1_HUMAN Carbonyl reductase [NADPH] 1 OS=Homo sapiens GN=CBR1 PE=1 SV=3	CBR1	CBR1	873	2	294.91	276.555	300.209	231.325	292.489	225.454	218.089	198.825	221.443	217.535	3.96511e-09	4.28111e-08	1.23646e-09	9.42378e-07	3.83888e-07	2.04133e-05	5.82902e-06	3.4772e-05	1.31924e-07	0.00108617	5	5	279.098	216.269	28.1234	10.2512	0.107291	0.0486637	2.44385	2.33459	0.0464625	0.0211219	-0.362936	-1.6335	-4.72645	0.00238005	-1	0	0	0	0	0
sp|P35520|CBS_HUMAN	P35520	sp|P35520|CBS_HUMAN	>sp|P35520|CBS_HUMAN Cystathionine beta-synthase OS=Homo sapiens GN=CBS PE=1 SV=2	CBS	CBS	875	5	386.163	242.719	369.588	261.933	291.621	769.069	916.857	869.963	1074.27	876.207	0.0854234	0.0237831	0.0609207	0.000871585	0.00700383	9.19129e-07	1.80835e-07	3.96693e-06	7.15845e-09	3.95122e-09	5	5	310.405	901.273	64.2759	110.969	0.208313	0.12102	2.48452	2.9523	0.0895102	0.0523675	1.55392	1.82689	11.2391	7.79622e-06	1	1	0	0	0	0
sp|Q6P1N0|C2D1A_HUMAN	Q6P1N0	sp|Q6P1N0|C2D1A_HUMAN	>sp|Q6P1N0|C2D1A_HUMAN Coiled-coil and C2 domain-containing protein 1A OS=Homo sapiens GN=CC2D1A PE=1 SV=1	CC2D1A	CC2D1A	54862	1	78.4924	74.347	61.455	64.1603	56.0479	75.8662	76.6546	56.3263	71.3432	84.1278	1.34764e-06	3.2876e-07	1.55788e-08	1.87018e-05	9.85694e-08	0.00206298	9.21973e-08	4.65541e-06	7.07909e-05	4.18862e-06	5	5	66.9005	72.8636	9.2839	10.3206	0.139107	0.15186	1.82209	1.85872	0.0601243	0.0655766	0.121659	0.587158	1.00996	0.418608	0	1	0	0	0	0
sp|Q16204|CCDC6_HUMAN	Q16204	sp|Q16204|CCDC6_HUMAN	>sp|Q16204|CCDC6_HUMAN Coiled-coil domain-containing protein 6 OS=Homo sapiens GN=CCDC6 PE=1 SV=2	CCDC6	CCDC6	8030	1	60.9359	81.6151	71.502	69.8617	51.8317	79.188	78.957	82.4396	62.1673	62.1301	1.59701e-05	4.20435e-06	4.00505e-07	3.92775e-06	4.38639e-06	2.1595e-06	1.01255e-09	5.59884e-07	5.03871e-08	1.27245e-07	5	5	67.1493	72.9764	11.2783	9.97976	0.174036	0.14126	1.82196	1.85981	0.0750197	0.0610456	0.125737	0.560794	0.96878	0.437956	0	1	0	0	0	0
sp|Q96ER9-2|CCD51_HUMAN	Q96ER9-2	sp|Q96ER9-2|CCD51_HUMAN	>sp|Q96ER9-2|CCD51_HUMAN Isoform of Q96ER9, Isoform 2 of Coiled-coil domain-containing protein 51 OS=Homo sapiens GN=CCDC51	CCDC51	CCDC51	79714	1	52.0787	80.1885	71.0662	61.5534	67.1517	77.6988	98.6389	116.04	119.95	106.031	0.112854	0.000534323	0.00753125	0.0837049	0.0117877	4.61858e-05	7.49808e-05	1.65039e-06	3.27373e-05	5.94935e-05	5	5	66.4077	103.672	10.5006	16.759	0.162762	0.174124	1.81775	2.0107	0.0702253	0.075057	0.640973	1.57349	4.67366	0.00255091	1	1	0	0	0	0
tr|C9JQ41|C9JQ41_HUMAN	C9JQ41	tr|C9JQ41|C9JQ41_HUMAN	>tr|C9JQ41|C9JQ41_HUMAN Isoform of Q4VC31, Coiled-coil domain-containing protein 58 OS=Homo sapiens GN=CCDC58 PE=1 SV=1	CCDC58	CCDC58	131076	1	146.309	133.591	131.65	118.865	159.269	142.111	130.282	127.618	117.303	148.85	0.000147978	2.16494e-08	1.80219e-06	9.94498e-08	0.000326169	1.09732e-07	2.48419e-07	8.77019e-09	4.84781e-07	5.54396e-09	5	5	137.937	133.233	15.3892	12.4167	0.111444	0.0936875	2.13753	2.1231	0.0482503	0.0405991	-0.0479494	-0.337865	-0.532077	0.682743	0	0	0	0	0	0
sp|Q9NQR7|CC177_HUMAN	Q9NQR7	sp|Q9NQR7|CC177_HUMAN	>sp|Q9NQR7|CC177_HUMAN Coiled-coil domain-containing protein 177 OS=Homo sapiens GN=CCDC177 PE=2 SV=3	CCDC177	CCDC177	56936	2	316.699	322.663	315.465	334.623	318.638	277.511	179.914	242.947	258.678	206.517	1.54945e-08	1.86272e-07	1.31254e-08	1.6322e-07	1.79154e-08	6.74965e-07	3.4315e-06	2.74879e-07	7.27111e-06	4.81812e-07	5	5	321.617	233.113	7.76445	39.5569	0.0238719	0.177426	2.50724	2.36231	0.010366	0.0764588	-0.481432	-1.57377	-4.5233	0.00307905	-1	0	0	0	0	0
sp|Q8ND76-2|CCNY_HUMAN	Q8ND76-2	sp|Q8ND76-2|CCNY_HUMAN	>sp|Q8ND76-2|CCNY_HUMAN Isoform of Q8ND76, Isoform 2 of Cyclin-Y OS=Homo sapiens GN=CCNY	CCNY	CCNY	219771	2	294.991	254.004	227.732	268.062	246.086	187.209	209.884	235.289	235.248	174.485	3.22357e-09	7.83271e-09	2.07375e-09	3.23149e-07	1.27645e-08	9.66522e-08	8.54726e-10	7.01653e-09	7.10642e-09	1.05738e-08	5	5	258.175	208.423	25.2165	27.5922	0.0969476	0.135017	2.41028	2.31584	0.0420054	0.0583727	-0.313724	-1.36654	-3.12782	0.0220537	0	0	0	0	0	0
sp|P78371-2|TCPB_HUMAN	P78371-2	sp|P78371-2|TCPB_HUMAN	>sp|P78371-2|TCPB_HUMAN Isoform of P78371, Isoform 2 of T-complex protein 1 subunit beta OS=Homo sapiens GN=CCT2	CCT2	CCT2	10576	7	1821.94	1745.8	1830.78	1668.27	1845.35	2055.18	1924.65	1893.69	1898.14	1882.5	3.89468e-08	1.73032e-08	4.77662e-09	5.89953e-07	1.75644e-08	8.23594e-08	1.45448e-09	1.91988e-08	1.95036e-08	1.49711e-07	5	5	1782.43	1930.83	74.5524	71.2126	0.0424762	0.0361218	3.2507	3.28551	0.0184389	0.0156824	0.115646	1.42472	2.25872	0.079072	0	1	0	0	0	0
sp|P49368|TCPG_HUMAN	P49368	sp|P49368|TCPG_HUMAN	>sp|P49368|TCPG_HUMAN T-complex protein 1 subunit gamma OS=Homo sapiens GN=CCT3 PE=1 SV=4	CCT3	CCT3	7203	13	4187.06	4143.29	4168.4	3969.65	4352.41	4909.65	4669.99	4593.64	4855.71	4626.48	2.80996e-08	7.93192e-09	2.96721e-10	1.27344e-08	7.71394e-09	8.26735e-09	1.60887e-09	5.15474e-09	1.79764e-09	4.54233e-09	5	5	4164.16	4731.09	136.245	142.287	0.0327915	0.0299481	3.61934	3.67481	0.0142373	0.0130034	0.184247	1.73685	3.86368	0.00762108	0	1	0	0	0	0
sp|P50991|TCPD_HUMAN	P50991	sp|P50991|TCPD_HUMAN	>sp|P50991|TCPD_HUMAN T-complex protein 1 subunit delta OS=Homo sapiens GN=CCT4 PE=1 SV=4	CCT4	CCT4	10575	13	2951.42	2867.8	2977.3	2883.21	2997.97	3031.67	3182	3113.45	3305.22	3157.25	8.48941e-08	1.27131e-08	9.40908e-10	6.81101e-08	1.95188e-07	4.16291e-08	1.39713e-08	2.2563e-08	1.35649e-08	9.86808e-09	5	5	2935.54	3157.92	57.4888	100.241	0.0196223	0.0316346	3.46762	3.49923	0.00852104	0.0137353	0.10499	1.59308	2.29394	0.0748945	0	1	0	0	0	0
sp|P48643|TCPE_HUMAN	P48643	sp|P48643|TCPE_HUMAN	>sp|P48643|TCPE_HUMAN T-complex protein 1 subunit epsilon OS=Homo sapiens GN=CCT5 PE=1 SV=1	CCT5	CCT5	22948	3	757.424	823.644	781.686	666.826	857.515	713.337	705.693	707.915	703.347	686.999	4.09784e-08	4.0051e-08	1.06716e-09	4.49197e-07	5.42676e-07	9.0229e-09	1.15626e-09	8.96921e-08	6.62291e-09	5.61188e-09	5	5	777.419	703.458	72.8029	9.91697	0.0965847	0.0141869	2.88907	2.8472	0.0418489	0.00616099	-0.139088	-1.16929	-2.05669	0.104665	0	0	0	0	0	0
sp|P40227|TCPZ_HUMAN	P40227	sp|P40227|TCPZ_HUMAN	>sp|P40227|TCPZ_HUMAN T-complex protein 1 subunit zeta OS=Homo sapiens GN=CCT6A PE=1 SV=3	CCT6A	CCT6A	908	8	1693.08	1490.08	1470.2	1501.07	1504.7	1621.08	1418.82	1573.13	1521.16	1592.83	2.69701e-07	7.6221e-08	8.05793e-09	1.09542e-07	1.90866e-08	2.7765e-08	7.21874e-08	3.05451e-07	1.84576e-07	2.10336e-08	5	5	1531.83	1545.41	91.1383	79.6207	0.0574683	0.0526282	3.18462	3.18857	0.0249376	0.0228403	0.013105	0.174248	0.220697	0.873624	0	1	0	0	0	0
sp|Q99832-3|TCPH_HUMAN	Q99832-3	sp|Q99832-3|TCPH_HUMAN	>sp|Q99832-3|TCPH_HUMAN Isoform of Q99832, Isoform 3 of T-complex protein 1 subunit eta OS=Homo sapiens GN=CCT7	CCT7	CCT7	10574	7	1551.44	1483.57	1613.56	1509.82	1639.97	1432.03	1425.33	1544.19	1540.89	1345.78	3.13062e-09	3.29847e-08	3.83745e-10	4.22354e-09	1.74698e-08	3.32852e-09	1.35797e-09	3.51367e-09	6.43159e-09	1.38634e-09	5	5	1559.67	1457.64	66.5144	84.6059	0.0426143	0.0583462	3.19272	3.16306	0.0184988	0.0253179	-0.0985107	-1.13616	-1.7238	0.167981	0	0	0	0	0	0
sp|P50990|TCPQ_HUMAN	P50990	sp|P50990|TCPQ_HUMAN	>sp|P50990|TCPQ_HUMAN T-complex protein 1 subunit theta OS=Homo sapiens GN=CCT8 PE=1 SV=4	CCT8	CCT8	10694	10	3748.72	3780.6	3793.62	3739.49	3930.02	4386.14	4222.69	4148.69	4274.7	4318.42	8.28134e-08	1.05784e-07	1.43248e-08	1.09475e-08	2.31707e-08	2.25571e-08	2.01823e-08	9.48835e-09	1.71851e-08	8.51631e-08	5	5	3798.49	4270.13	76.8123	90.5641	0.0200114	0.0212338	3.57954	3.63036	0.00868997	0.00922067	0.168825	1.80952	3.84154	0.00783867	0	1	0	0	0	0
sp|Q16543|CDC37_HUMAN	Q16543	sp|Q16543|CDC37_HUMAN	>sp|Q16543|CDC37_HUMAN Hsp90 co-chaperone Cdc37 OS=Homo sapiens GN=CDC37 PE=1 SV=1	CDC37	CDC37	11140	2	494.276	517.755	504.811	542.585	505.349	647.317	622.977	574.771	598.501	559.736	1.1227e-08	1.44294e-08	1.2562e-08	4.70438e-09	1.29725e-07	3.98705e-08	6.30106e-10	3.39104e-08	1.50558e-08	1.68371e-09	5	5	512.955	600.66	18.5342	35.4422	0.0356985	0.0588953	2.70986	2.77803	0.0154987	0.0255557	0.226456	1.65928	4.05421	0.00589661	0	1	0	0	0	0
sp|P60953|CDC42_HUMAN	P60953	sp|P60953|CDC42_HUMAN	>sp|P60953|CDC42_HUMAN Cell division control protein 42 homolog OS=Homo sapiens GN=CDC42 PE=1 SV=2	CDC42	CDC42	998	5	3818.67	3527.45	3667.34	3689.18	3867.75	4486.29	4074.25	3651.73	3938.33	4180.8	4.08773e-09	3.47464e-08	5.74256e-10	8.6146e-09	1.13741e-08	3.0274e-08	9.24579e-09	1.12404e-08	3.98246e-09	5.11523e-09	5	5	3714.08	4066.28	134.339	307.333	0.0363337	0.0759312	3.56962	3.6082	0.0157743	0.0329291	0.128155	1.21636	2.06985	0.102762	0	1	0	0	0	0
sp|Q9H3Q1|BORG4_HUMAN	Q9H3Q1	sp|Q9H3Q1|BORG4_HUMAN	>sp|Q9H3Q1|BORG4_HUMAN Cdc42 effector protein 4 OS=Homo sapiens GN=CDC42EP4 PE=1 SV=1	CDC42EP4	CDC42EP4	23580	1	75.7353	65.7223	53.0174	47.8047	56.117	119.086	120.201	93.0114	142.025	103.013	0.000361142	0.00535139	0.0036215	0.00267138	0.000145416	9.74894e-07	1.47518e-09	1.64627e-06	1.43997e-08	4.42408e-08	5	5	59.6793	115.467	11.0949	18.7094	0.183304	0.162827	1.77	2.05791	0.0789509	0.0702528	0.956428	1.72092	6.79908	0.000229233	1	1	0	0	0	0
sp|P19022-2|CADH2_HUMAN	P19022-2	sp|P19022-2|CADH2_HUMAN	>sp|P19022-2|CADH2_HUMAN Isoform of P19022, Isoform 2 of Cadherin-2 OS=Homo sapiens GN=CDH2	CDH2	CDH2	1000	6	2034.1	2101.19	2141.99	2257.79	2448.18	1968.35	1791.74	1959.3	2253.3	2066.22	7.12853e-09	3.776e-08	4.42033e-10	9.59724e-08	6.82913e-09	2.77717e-08	7.84647e-10	3.12842e-08	3.11595e-09	1.34181e-08	5	5	2196.65	2007.78	162.424	169.022	0.0725574	0.0838789	3.34084	3.30149	0.0314699	0.0363643	-0.13069	-1.03039	-1.77478	0.157003	0	0	0	0	0	0
tr|J3QKW5|J3QKW5_HUMAN	J3QKW5	tr|J3QKW5|J3QKW5_HUMAN	>tr|J3QKW5|J3QKW5_HUMAN Isoform of P55286, Cadherin-8 OS=Homo sapiens GN=CDH8 PE=1 SV=1	CDH8	CDH8	1006	1	73.166	129.575	90.7159	113.651	95.8945	10.3003	63.3238	93.5819	77.0626	75.8038	6.6761e-08	6.46021e-07	3.06413e-10	7.90647e-05	7.81722e-07	0.228618	0.000222588	0.000221088	0.00225205	0.000721214	5	5	100.601	64.0145	21.6931	31.895	0.221469	1.13257	1.99438	1.71043	0.0950338	0.394555	-0.943256	-0.918362	-1.8192	0.147583	0	0	0	0	0	0
sp|Q9Y6N8|CAD10_HUMAN	Q9Y6N8	sp|Q9Y6N8|CAD10_HUMAN	>sp|Q9Y6N8|CAD10_HUMAN Cadherin-10 OS=Homo sapiens GN=CDH10 PE=1 SV=2	CDH10	CDH10	1008	1	614.79	588.77	613.62	572.785	505.312	468.305	434.492	441.93	462.64	465.909	6.28324e-06	6.17016e-05	1.05327e-05	3.94731e-06	9.74447e-06	4.03365e-06	1.40074e-06	1.44804e-07	2.38584e-05	1.70517e-05	5	5	579.055	454.655	44.8427	15.3719	0.0805468	0.0340626	2.76162	2.65748	0.0349245	0.0147889	-0.345956	-1.72331	-5.46712	0.000986381	-1	0	0	0	0	0
sp|P55287|CAD11_HUMAN	P55287	sp|P55287|CAD11_HUMAN	>sp|P55287|CAD11_HUMAN Cadherin-11 OS=Homo sapiens GN=CDH11 PE=2 SV=2	CDH11	CDH11	1009	2	312.901	301.044	304.228	363.703	338.26	249.703	243.566	249.202	275.684	255.043	2.19105e-06	1.86856e-06	2.43003e-05	1.3279e-06	2.91631e-06	0.000157867	0.000123087	4.9455e-05	4.92905e-06	4.38106e-05	5	5	324.027	254.639	26.5556	12.4457	0.0803876	0.0478013	2.50945	2.40552	0.0348557	0.020748	-0.345228	-1.70131	-5.24035	0.00125597	-1	0	0	0	0	0
tr|A0A0A0MTR1|A0A0A0MTR1_HUMAN	A0A0A0MTR1	tr|A0A0A0MTR1|A0A0A0MTR1_HUMAN	>tr|A0A0A0MTR1|A0A0A0MTR1_HUMAN Isoform of P55290, Cadherin-13 OS=Homo sapiens GN=CDH13 PE=1 SV=2	CDH13	CDH13	1012	1	131.064	122.469	159.034	170.626	171.035	200.912	199.549	225.055	209.374	246.686	4.02487e-07	0.000551482	1.46825e-06	3.23943e-05	7.51606e-08	2.36205e-09	2.41572e-09	2.13354e-07	1.83383e-07	1.52064e-09	5	5	150.845	216.315	22.7071	19.782	0.156262	0.089349	2.17443	2.33368	0.0674549	0.0387267	0.529041	1.61418	4.93661	0.00181814	1	1	0	0	0	0
sp|O14735-3|CDIPT_HUMAN	O14735-3	sp|O14735-3|CDIPT_HUMAN	>sp|O14735-3|CDIPT_HUMAN Isoform of O14735, Isoform 3 of CDP-diacylglycerol--inositol 3-phosphatidyltransferase OS=Homo sapiens GN=CDIPT	CDIPT	CDIPT	10423	1	921.169	989.042	916.228	823.944	812.067	785.878	805.086	777.978	710.118	770.147	2.11246e-08	2.50946e-08	4.38368e-10	5.25105e-09	5.12994e-09	1.42212e-08	3.28833e-09	2.23942e-09	1.90837e-08	5.07046e-09	5	5	892.49	769.842	73.9504	35.8209	0.0830686	0.0476104	2.94941	2.88601	0.0360142	0.0206652	-0.210595	-1.46108	-3.15072	0.0213544	0	0	0	0	0	0
sp|Q00535|CDK5_HUMAN	Q00535	sp|Q00535|CDK5_HUMAN	>sp|Q00535|CDK5_HUMAN Cyclin-dependent-like kinase 5 OS=Homo sapiens GN=CDK5 PE=1 SV=3	CDK5	CDK5	1020	3	986	960.563	980.902	1000.11	925.698	817.839	774.478	694.765	693.393	789.008	3.62499e-09	1.65482e-08	2.26812e-10	4.5348e-09	5.44322e-09	3.14215e-09	1.24778e-09	2.39573e-08	1.41957e-08	4.49896e-09	5	5	970.653	753.897	28.8562	56.7941	0.0300366	0.0760529	2.98691	2.87632	0.0130418	0.0329817	-0.367384	-1.75821	-6.03046	0.0005025	-1	0	0	0	0	0
sp|O94921-3|CDK14_HUMAN	O94921-3	sp|O94921-3|CDK14_HUMAN	>sp|O94921-3|CDK14_HUMAN Isoform of O94921, Isoform 3 of Cyclin-dependent kinase 14 OS=Homo sapiens GN=CDK14	CDK14	CDK14	5218	1	351.727	289.264	315.479	316.407	285.692	291.338	276.132	262.911	261.485	248.541	8.95683e-06	1.49719e-07	3.57208e-05	1.06012e-05	0.000261861	0.000371957	5.76943e-05	5.98311e-06	2.26758e-05	5.14211e-05	5	5	311.714	268.081	26.5442	16.2618	0.08396	0.0602922	2.49252	2.42763	0.0363993	0.0261608	-0.215558	-1.42877	-3.06992	0.0238991	0	0	0	0	0	0
sp|O76039-2|CDKL5_HUMAN	O76039-2	sp|O76039-2|CDKL5_HUMAN	>sp|O76039-2|CDKL5_HUMAN Isoform of O76039, Isoform 2 of Cyclin-dependent kinase-like 5 OS=Homo sapiens GN=CDKL5	CDKL5	CDKL5	6792	2	162.087	187.779	215.298	183.049	173.45	138.589	135.551	104.821	118.876	155.445	4.54046e-05	0.000105003	1.53535e-05	0.000748319	1.61682e-06	8.06671e-08	5.86644e-08	9.47502e-05	0.000278525	7.94363e-07	5	5	184.332	130.656	19.9104	19.414	0.105943	0.152587	2.26364	2.11219	0.045882	0.0658866	-0.50309	-1.57585	-4.56834	0.00290193	-1	0	0	0	0	0
sp|O95674|CDS2_HUMAN	O95674	sp|O95674|CDS2_HUMAN	>sp|O95674|CDS2_HUMAN Phosphatidate cytidylyltransferase 2 OS=Homo sapiens GN=CDS2 PE=1 SV=1	CDS2	CDS2	8760	1	106.279	136.07	125.616	58.9785	131.864	52.4208	70.9441	109.976	55.8318	53.5807	2.37429e-06	4.69072e-05	9.7888e-07	0.00226574	2.73775e-05	0.0746662	0.000213764	2.23435e-05	0.00709509	0.0105445	5	5	111.762	68.5508	31.635	24.3303	0.357852	0.320166	2.03001	1.81752	0.150756	0.135668	-0.705886	-1.21032	-2.69913	0.0411822	0	0	0	0	0	0
tr|V9GYD9|V9GYD9_HUMAN	V9GYD9	tr|V9GYD9|V9GYD9_HUMAN	>tr|V9GYD9|V9GYD9_HUMAN Isoform of O95319, CUGBP Elav-like family member 2 OS=Homo sapiens GN=CELF2 PE=1 SV=1	CELF2	CELF2	10659	1	186.648	154.13	159.661	165.267	214.56	183.949	225.076	170.004	222.373	289.122	0.000352564	4.59201e-06	2.90611e-08	2.37312e-06	0.00013376	2.77832e-07	2.05365e-07	1.90382e-07	1.40715e-08	1.53544e-08	5	5	176.053	218.105	24.8029	46.3429	0.136173	0.208615	2.24237	2.33113	0.0588679	0.0896374	0.294857	1.03889	2.06817	0.102971	0	1	0	0	0	0
tr|J3KRC3|J3KRC3_HUMAN	J3KRC3	tr|J3KRC3|J3KRC3_HUMAN	>tr|J3KRC3|J3KRC3_HUMAN Isoform of Q96GE4, Centrosomal protein of 95 kDa (Fragment) OS=Homo sapiens GN=CEP95 PE=1 SV=1	CEP95	CEP95	90799	1	803.119	635.983	709.315	701.775	713.628	23.0476	64.9976	76.7744	37.4405	53.3133	9.62275e-07	4.14482e-06	1.48201e-06	2.98078e-07	6.63251e-07	0.466708	0.488213	0.538045	0.125219	0.382177	5	5	712.764	51.1147	59.5667	21.3936	0.0830044	0.508927	2.85175	1.67218	0.0359865	0.208426	-3.91843	-1.85037	-14.3811	1.5852e-06	-1	0	0	0	0	0
sp|Q5SW79-2|CE170_HUMAN	Q5SW79-2	sp|Q5SW79-2|CE170_HUMAN	>sp|Q5SW79-2|CE170_HUMAN Isoform of Q5SW79, Isoform 2 of Centrosomal protein of 170 kDa OS=Homo sapiens GN=CEP170	CEP170	CEP170	9859	1	114.963	105.126	112.102	138.536	121.072	130.328	102.257	134.251	122.757	125.919	4.84123e-06	6.73324e-06	6.74958e-09	1.11478e-07	7.04549e-06	8.93119e-07	5.9746e-07	1.90777e-05	2.87144e-06	1.80221e-07	5	5	118.36	123.102	12.6519	12.4407	0.104023	0.107091	2.0713	2.08836	0.045055	0.0463766	0.0566698	0.387417	0.616389	0.630399	0	1	0	0	0	0
sp|Q9Y4F5-2|C170B_HUMAN	Q9Y4F5-2	sp|Q9Y4F5-2|C170B_HUMAN	>sp|Q9Y4F5-2|C170B_HUMAN Isoform of Q9Y4F5, Isoform 2 of Centrosomal protein of 170 kDa protein B OS=Homo sapiens GN=CEP170B	CEP170B	CEP170B	283638	5	278.045	242.258	323.163	354.724	267.199	505.323	570.812	493.899	422.153	522.079	1.77964e-05	0.0144539	0.000116266	0.000961408	0.000134825	3.89462e-07	3.91093e-09	2.77329e-07	5.63037e-07	1.68761e-07	5	5	293.078	502.853	45.2322	53.8213	0.153484	0.110232	2.46291	2.69938	0.0662698	0.0477288	0.785548	1.7387	7.02893	0.000180651	1	1	0	0	0	0
sp|P23528|COF1_HUMAN	P23528	sp|P23528|COF1_HUMAN	>sp|P23528|COF1_HUMAN Cofilin-1 OS=Homo sapiens GN=CFL1 PE=1 SV=3	CFL1	CFL1	1072	4	2700.94	2470.54	2477.43	2649.84	2598.67	2516.53	2460.24	2480.18	2419	2593.07	1.16273e-08	1.02473e-05	4.16571e-08	4.66763e-06	1.46249e-07	1.47842e-07	1.66718e-08	6.32306e-08	3.39498e-07	1.4716e-05	5	5	2579.48	2493.8	102.902	65.7231	0.0399721	0.0262088	3.41126	3.39674	0.0173527	0.0113804	-0.0482124	-0.918087	-0.990446	0.427663	0	0	0	0	0	0
sp|Q9Y281|COF2_HUMAN	Q9Y281	sp|Q9Y281|COF2_HUMAN	>sp|Q9Y281|COF2_HUMAN Cofilin-2 OS=Homo sapiens GN=CFL2 PE=1 SV=1	CFL2	CFL2	1073	2	931.41	958.705	950.554	958.367	984.418	1181.55	1117.37	1115.13	1099.1	1094.95	1.56765e-08	1.08766e-07	6.91444e-10	1.91691e-08	6.06345e-09	2.26226e-08	3.46563e-09	2.95004e-09	1.29026e-08	6.82679e-09	5	5	956.691	1121.62	19.0554	34.893	0.0198906	0.0306147	2.9807	3.04968	0.00863753	0.0132927	0.229145	1.82195	5.02602	0.0016349	1	1	0	0	0	0
sp|Q9NX63|MIC19_HUMAN	Q9NX63	sp|Q9NX63|MIC19_HUMAN	>sp|Q9NX63|MIC19_HUMAN MICOS complex subunit MIC19 OS=Homo sapiens GN=CHCHD3 PE=1 SV=1	CHCHD3	CHCHD3	54927	3	1454.77	1080.07	1249.01	1142.43	1424.88	1071.75	952.602	1094.29	1182.33	1103.92	1.64532e-08	3.95353e-08	1.96531e-09	1.04237e-07	1.61944e-08	2.82491e-08	5.33529e-09	2.67926e-08	9.61668e-09	2.33845e-09	5	5	1270.23	1080.98	166.521	82.9784	0.132092	0.0786229	3.10088	3.03276	0.057119	0.0340929	-0.226295	-1.19389	-2.40566	0.0634139	0	0	0	0	0	0
tr|A0A087WT52|A0A087WT52_HUMAN	A0A087WT52	tr|A0A087WT52|A0A087WT52_HUMAN	>tr|A0A087WT52|A0A087WT52_HUMAN Isoform of O14757, Serine/threonine-protein kinase Chk1 (Fragment) OS=Homo sapiens GN=CHEK1 PE=1 SV=5	CHEK1	CHEK1	1111	1	198.769	205.625	180.757	194.694	157.974	179.011	178.287	178.742	143.568	157.054	3.11193e-08	1.21339e-08	5.59967e-10	3.21026e-09	1.16719e-07	1.58315e-09	2.07637e-09	7.39744e-09	7.45749e-09	1.07248e-09	5	5	187.564	167.332	18.8712	16.2556	0.105125	0.100661	2.27129	2.22187	0.0455297	0.0436065	-0.164188	-0.999566	-1.82228	0.146943	0	0	0	0	0	0
sp|O00533|NCHL1_HUMAN	O00533	sp|O00533|NCHL1_HUMAN	>sp|O00533|NCHL1_HUMAN Neural cell adhesion molecule L1-like protein OS=Homo sapiens GN=CHL1 PE=1 SV=4	CHL1	CHL1	10752	1	129.202	125.178	105.982	128.182	128.918	83.3526	75.662	98.4001	81.7456	99.3776	3.76521e-05	9.01378e-06	7.68035e-05	1.0046e-05	4.47407e-06	1.0034e-06	4.71788e-05	0.000458245	8.36501e-05	1.4655e-05	5	5	123.493	87.7076	9.91807	10.6081	0.0850154	0.120898	2.09043	1.94051	0.0368552	0.0523151	-0.498042	-1.66957	-5.46216	0.000990503	-1	0	0	0	0	0
sp|Q9Y3E7-4|CHMP3_HUMAN	Q9Y3E7-4	sp|Q9Y3E7-4|CHMP3_HUMAN	>sp|Q9Y3E7-4|CHMP3_HUMAN Isoform of Q9Y3E7, Isoform 4 of Charged multivesicular body protein 3 OS=Homo sapiens GN=CHMP3	CHMP3	CHMP3	51652	1	119.52	124.456	109.704	123.961	123.005	200.758	190.388	241.114	221.889	190.769	8.72371e-06	1.94685e-07	1.43689e-08	9.23967e-09	4.9065e-08	1.32081e-07	1.25613e-06	6.25617e-06	0.000107613	0.00124348	5	5	120.129	208.984	6.13848	22.0462	0.052616	0.10343	2.07918	2.31824	0.022835	0.0447995	0.794132	1.83358	10.4524	1.2773e-05	1	1	0	0	0	0
tr|I3L4G8|I3L4G8_HUMAN	I3L4G8	tr|I3L4G8|I3L4G8_HUMAN	>tr|I3L4G8|I3L4G8_HUMAN Isoform of Q96FZ7, Charged multivesicular body protein 6 (Fragment) OS=Homo sapiens GN=CHMP6 PE=1 SV=1	CHMP6	CHMP6	79643	1	208.023	179.513	204.867	183.575	202.797	226.603	227.754	186.011	180.285	220.91	7.75526e-06	1.35095e-05	8.23612e-07	2.44213e-06	0.000198622	1.89059e-08	3.40315e-08	1.68421e-06	4.67557e-07	3.68035e-09	5	5	195.755	208.313	13.1841	23.2063	0.0683182	0.114459	2.29091	2.31649	0.0296357	0.0495473	0.0849699	0.627202	1.00998	0.418608	0	1	0	0	0	0
sp|Q8WUX9|CHMP7_HUMAN	Q8WUX9	sp|Q8WUX9|CHMP7_HUMAN	>sp|Q8WUX9|CHMP7_HUMAN Charged multivesicular body protein 7 OS=Homo sapiens GN=CHMP7 PE=1 SV=1	CHMP7	CHMP7	91782	1	73.7266	95.4961	69.9953	77.1741	76.1163	102.459	74.2205	77.1971	61.2723	75.9781	0.0017296	9.10884e-06	7.7913e-05	6.18861e-08	1.68553e-06	8.46062e-06	3.93571e-08	1.66356e-07	3.11713e-07	1.61836e-07	5	5	78.5017	78.2254	9.8922	14.9736	0.119339	0.185497	1.89233	1.88733	0.0516451	0.0798801	-0.0166094	-0.0787777	-0.129903	0.928881	0	0	0	0	0	0
tr|E9PPQ5|E9PPQ5_HUMAN	E9PPQ5	tr|E9PPQ5|E9PPQ5_HUMAN	>tr|E9PPQ5|E9PPQ5_HUMAN Isoform of Q9UHD1, Cysteine and histidine-rich domain-containing protein 1 OS=Homo sapiens GN=CHORDC1 PE=1 SV=1	CHORDC1	CHORDC1	26973	1	189.668	193.092	174.967	166.071	166.235	241.035	253.99	234.859	221.005	222.248	5.949e-08	1.70112e-06	8.12661e-08	2.24493e-09	4.9608e-08	2.75369e-08	1.17747e-08	3.09896e-09	2.50882e-09	6.7404e-08	5	5	178.006	234.627	12.7851	13.7373	0.0715369	0.0581903	2.24955	2.36979	0.0310285	0.0252504	0.399439	1.74882	6.11495	0.000469672	1	1	0	0	0	0
sp|Q99653|CHP1_HUMAN	Q99653	sp|Q99653|CHP1_HUMAN	>sp|Q99653|CHP1_HUMAN Calcineurin B homologous protein 1 OS=Homo sapiens GN=CHP1 PE=1 SV=3	CHP1	CHP1	11261	1	172.876	194.661	207.151	227.198	206.743	142.389	156.144	165.148	166.636	165.948	1.5705e-09	1.92576e-08	1.42874e-10	3.43329e-09	2.6614e-09	9.54628e-08	8.39715e-10	9.46969e-08	9.7619e-10	6.3698e-09	5	5	201.726	159.253	19.9099	10.3458	0.100825	0.0671059	2.30303	2.20132	0.043677	0.029111	-0.337853	-1.58878	-4.3116	0.00409897	-1	0	0	0	0	0
sp|Q9NZ45|CISD1_HUMAN	Q9NZ45	sp|Q9NZ45|CISD1_HUMAN	>sp|Q9NZ45|CISD1_HUMAN CDGSH iron-sulfur domain-containing protein 1 OS=Homo sapiens GN=CISD1 PE=1 SV=1	CISD1	CISD1	55847	1	5841.31	5383.11	5479.39	5010.89	6473.81	6098.24	5784.88	5642.65	5670.62	6130.42	2.53219e-07	1.06261e-07	1.0409e-08	1.40563e-07	6.23432e-08	2.36143e-07	2.99245e-08	1.85001e-08	2.66391e-08	3.2554e-08	5	5	5637.7	5865.36	553.014	233.714	0.0965957	0.0396926	3.74947	3.76802	0.0418536	0.0172315	0.0616226	0.58483	0.871987	0.487641	0	1	0	0	0	0
sp|Q8N5K1|CISD2_HUMAN	Q8N5K1	sp|Q8N5K1|CISD2_HUMAN	>sp|Q8N5K1|CISD2_HUMAN CDGSH iron-sulfur domain-containing protein 2 OS=Homo sapiens GN=CISD2 PE=1 SV=1	CISD2	CISD2	493856	1	135.172	167.292	147.66	148.174	130.276	287.978	262.018	285.149	287.749	316.462	0.000217341	2.8483e-06	0.0016741	0.00087052	4.69089e-06	3.83719e-08	9.08221e-10	4.70873e-08	2.25164e-08	3.34556e-08	5	5	145.715	287.871	14.3607	19.3212	0.0972286	0.0669615	2.16185	2.45842	0.0421266	0.0290485	0.985175	1.85373	12.8059	3.8025e-06	1	1	0	0	0	0
sp|O14578-4|CTRO_HUMAN;sp|O14578-3|CTRO_HUMAN	O14578-4;O14578-3	sp|O14578-4|CTRO_HUMAN;sp|O14578-3|CTRO_HUMAN	>sp|O14578-4|CTRO_HUMAN Isoform of O14578, Isoform 4 of Citron Rho-interacting kinase OS=Homo sapiens GN=CIT;>sp|O14578-3|CTRO_HUMAN Isoform of O14578, Isoform 3 of Citron Rho-interacting kinase OS=Homo sapiens GN=CIT	CIT	CIT	11113	3	228.657	143.811	211.4	228.803	248.837	222.681	159.638	185.793	166.656	166.729	2.02531e-05	0.000168243	4.98883e-06	5.00269e-08	1.04316e-07	9.1163e-06	0.00258606	9.43046e-06	3.99867e-05	1.85767e-05	5	5	212.302	180.299	40.5167	25.6103	0.21852	0.135071	2.31949	2.25274	0.0937976	0.0583956	-0.221758	-0.817772	-1.51329	0.223814	0	0	0	0	0	0
sp|Q14008-2|CKAP5_HUMAN	Q14008-2	sp|Q14008-2|CKAP5_HUMAN	>sp|Q14008-2|CKAP5_HUMAN Isoform of Q14008, Isoform 2 of Cytoskeleton-associated protein 5 OS=Homo sapiens GN=CKAP5	CKAP5	CKAP5	9793	2	209.58	233.59	215.477	233.416	211.588	196.462	202.555	191.605	205.378	210.823	0.00523467	6.61897e-05	3.13936e-08	2.54751e-05	7.77241e-06	1.53799e-07	1.85463e-06	0.00111283	2.66211e-06	1.06888e-07	5	5	220.73	201.365	11.8514	7.52106	0.0533752	0.0374471	2.34337	2.30374	0.0231641	0.0162574	-0.131632	-1.40793	-2.41533	0.0626403	0	0	0	0	0	0
sp|P12277|KCRB_HUMAN	P12277	sp|P12277|KCRB_HUMAN	>sp|P12277|KCRB_HUMAN Creatine kinase B-type OS=Homo sapiens GN=CKB PE=1 SV=1	CKB	CKB	1152	10	36542	32685.1	33429	36682.6	32619.3	31300.6	30470.1	29515.6	31500.1	32285.6	9.32328e-07	4.77193e-07	1.22577e-08	2.39552e-06	3.59832e-07	3.61721e-07	1.89487e-07	1.732e-07	1.01147e-07	1.23669e-07	5	5	34391.6	31014.4	2052.62	1057.87	0.0592612	0.0343074	4.53584	4.49136	0.0257143	0.0148952	-0.14776	-1.44919	-2.65237	0.0441112	0	0	0	0	0	0
sp|P12532|KCRU_HUMAN	P12532	sp|P12532|KCRU_HUMAN	>sp|P12532|KCRU_HUMAN Creatine kinase U-type, mitochondrial OS=Homo sapiens GN=CKMT1A PE=1 SV=1	CKMT1A	CKMT1A	548596	7	21048.4	17526.8	19251.8	17184.1	19044.8	21168.3	22071.3	20616.3	21138	22538.2	1.73097e-07	1.17563e-07	6.54836e-09	2.55962e-08	1.20807e-07	5.01181e-07	4.33282e-08	1.50972e-07	4.52956e-08	2.62016e-07	5	5	18811.2	21506.4	1545.24	778.781	0.0814777	0.0360777	4.27326	4.33234	0.0353268	0.0156633	0.196268	1.46191	3.06769	0.0239659	0	1	0	0	0	0
tr|A0A0U1RQI6|A0A0U1RQI6_HUMAN	A0A0U1RQI6	tr|A0A0U1RQI6|A0A0U1RQI6_HUMAN	>tr|A0A0U1RQI6|A0A0U1RQI6_HUMAN Isoform of O75122, CLIP-associating protein 2 OS=Homo sapiens GN=CLASP2 PE=4 SV=1	CLASP2	CLASP2	23122	7	945.454	807.623	851.21	839.077	877.619	1071.01	898.769	955.777	995.118	902.093	6.93562e-08	5.26033e-06	6.42471e-08	3.73198e-08	3.30713e-07	4.75392e-07	2.43597e-08	7.70637e-07	3.29697e-06	3.64782e-07	5	5	864.197	964.552	51.9208	71.7148	0.059184	0.0733523	2.936	2.98338	0.0256808	0.0318138	0.157412	1.28179	2.37779	0.0661021	0	1	0	0	0	0
tr|A0A087WU31|A0A087WU31_HUMAN	A0A087WU31	tr|A0A087WU31|A0A087WU31_HUMAN	>tr|A0A087WU31|A0A087WU31_HUMAN Isoform of P51790, Chloride channel protein OS=Homo sapiens GN=CLCN3 PE=1 SV=1	CLCN3	CLCN3	1182	1	176.009	101.421	112.217	116.941	116.007	122.784	107.29	130.577	117.755	128.592	9.81336e-08	0.00011024	2.97744e-06	4.09202e-07	2.89676e-06	1.73959e-05	8.52052e-06	1.14016e-06	1.05165e-05	3.15459e-05	5	5	124.519	121.4	29.436	9.35738	0.214402	0.0790483	2.08683	2.08315	0.0920692	0.0342768	-0.0122312	-0.0561926	-0.0929192	0.948659	0	0	0	0	0	0
sp|P51797|CLCN6_HUMAN	P51797	sp|P51797|CLCN6_HUMAN	>sp|P51797|CLCN6_HUMAN Chloride transport protein 6 OS=Homo sapiens GN=CLCN6 PE=1 SV=2	CLCN6	CLCN6	1185	1	65.6293	63.7005	65.9845	86.2507	80.3501	137.786	137.9	146.448	169.33	162.506	4.19062e-07	0.0132239	0.00463774	0.0210518	9.91453e-05	2.79354e-08	3.82085e-08	4.94699e-05	1.93232e-09	9.00238e-09	5	5	72.383	150.794	10.2192	14.4492	0.138331	0.0950216	1.85629	2.17681	0.059792	0.0411747	1.06476	1.82399	10.5322	1.23353e-05	1	1	0	0	0	0
sp|Q9Y696|CLIC4_HUMAN	Q9Y696	sp|Q9Y696|CLIC4_HUMAN	>sp|Q9Y696|CLIC4_HUMAN Chloride intracellular channel protein 4 OS=Homo sapiens GN=CLIC4 PE=1 SV=4	CLIC4	CLIC4	25932	1	180.323	143.086	131.684	193.108	196.068	207.317	225.922	219.941	257.043	228.853	2.90605e-06	4.00365e-05	8.87416e-07	0.000168009	8.61098e-06	2.55601e-08	2.36128e-07	3.39381e-09	6.64357e-08	1.45956e-08	5	5	168.854	227.815	29.6057	18.3106	0.183911	0.0787932	2.22188	2.35649	0.0792081	0.0341665	0.447178	1.47396	3.8147	0.00811982	0	1	0	0	0	0
sp|Q14677|EPN4_HUMAN	Q14677	sp|Q14677|EPN4_HUMAN	>sp|Q14677|EPN4_HUMAN Clathrin interactor 1 OS=Homo sapiens GN=CLINT1 PE=1 SV=1	CLINT1	CLINT1	9685	1	87.2296	83.2787	93.1504	98.9055	83.3429	98.4303	113.562	105.613	95.9357	89.3234	5.66619e-06	7.35145e-05	2.94754e-06	1.00688e-06	6.0841e-06	0.00011344	0.00046241	6.62856e-06	0.000283897	0.00036601	5	5	89.1814	100.573	6.76482	9.31087	0.0748456	0.0921872	1.94929	2.00101	0.0324597	0.0399517	0.17178	1.17999	2.22338	0.0830383	0	1	0	0	0	0
sp|Q9H078-5|CLPB_HUMAN	Q9H078-5	sp|Q9H078-5|CLPB_HUMAN	>sp|Q9H078-5|CLPB_HUMAN Isoform of Q9H078, Isoform 5 of Caseinolytic peptidase B protein homolog OS=Homo sapiens GN=CLPB	CLPB	CLPB	81570	1	87.4318	92.2549	98.1166	47.6035	90.0364	100.768	76.644	112.27	93.8798	105.66	3.73093e-06	5.71622e-05	6.07557e-05	0.0154567	1.76143e-05	5.5666e-08	1.96969e-06	3.60286e-06	4.19326e-07	2.47179e-06	5	5	83.0886	97.8444	20.2249	13.6282	0.303786	0.148014	1.90609	1.98691	0.129032	0.0639336	0.268471	0.769497	1.42875	0.249362	0	1	0	0	0	0
sp|Q16740|CLPP_HUMAN	Q16740	sp|Q16740|CLPP_HUMAN	>sp|Q16740|CLPP_HUMAN ATP-dependent Clp protease proteolytic subunit, mitochondrial OS=Homo sapiens GN=CLPP PE=1 SV=1	CLPP	CLPP	8192	1	164.833	123.073	147.241	159.98	132.685	170.766	170.253	155.975	179.319	188.5	1.35545e-08	1.61326e-07	1.37423e-09	4.45043e-09	4.05818e-07	6.85683e-08	1.5836e-08	7.39112e-08	1.37075e-07	2.40922e-09	5	5	145.562	172.962	17.7033	12.0684	0.124036	0.0704147	2.16042	2.2371	0.0536627	0.0305429	0.254701	1.32918	2.87372	0.0314905	0	1	0	0	0	0
sp|P09496-3|CLCA_HUMAN	P09496-3	sp|P09496-3|CLCA_HUMAN	>sp|P09496-3|CLCA_HUMAN Isoform of P09496, Isoform 3 of Clathrin light chain A OS=Homo sapiens GN=CLTA	CLTA	CLTA	1211	1	2115.89	2483.92	2642.51	2599.79	2389.05	2596.78	2212.33	2525.57	2249.43	2172.92	1.77485e-07	1.62779e-07	3.32059e-09	5.7052e-08	8.86788e-08	4.02219e-07	1.18813e-08	8.41376e-08	4.54182e-08	4.69815e-09	5	5	2446.23	2351.4	209.714	195.028	0.0888528	0.0820466	3.38716	3.37015	0.0385125	0.0355726	-0.0565072	-0.471423	-0.721752	0.569408	0	0	0	0	1	0
sp|P09497|CLCB_HUMAN	P09497	sp|P09497|CLCB_HUMAN	>sp|P09497|CLCB_HUMAN Clathrin light chain B OS=Homo sapiens GN=CLTB PE=1 SV=1	CLTB	CLTB	1212	1	1060.84	1471.58	1542.66	1589.71	1348.59	1562.04	1400.35	1313.44	1410.95	1355.51	3.05293e-08	3.1533e-08	1.73705e-09	2.89741e-08	3.42685e-09	5.25743e-09	2.37559e-09	4.49464e-09	2.55684e-09	2.5387e-09	5	5	1402.67	1408.46	211.603	94.197	0.163932	0.0654155	3.14258	3.14799	0.0707231	0.0283793	0.017977	0.106354	0.1707	0.904794	0	1	0	0	1	0
sp|Q00610-2|CLH1_HUMAN	Q00610-2	sp|Q00610-2|CLH1_HUMAN	>sp|Q00610-2|CLH1_HUMAN Isoform of Q00610, Isoform 2 of Clathrin heavy chain 1 OS=Homo sapiens GN=CLTC	CLTC	CLTC	1213	59	104559	104723	104469	99108.5	98108.5	93713	87770.8	102606	101945	85504.7	7.11071e-08	1.09644e-07	6.1926e-09	5.81833e-08	6.57849e-08	4.64998e-08	1.56613e-08	3.14152e-08	1.66077e-08	5.67557e-08	5	5	102194	94308	3293.03	7870.41	0.0324483	0.0837227	5.00924	4.97334	0.0140884	0.0362968	-0.119275	-1.11776	-1.85599	0.140012	0	0	0	0	1	0
sp|P30085|KCY_HUMAN	P30085	sp|P30085|KCY_HUMAN	>sp|P30085|KCY_HUMAN UMP-CMP kinase OS=Homo sapiens GN=CMPK1 PE=1 SV=3	CMPK1	CMPK1	51727	2	768.933	746.72	768.824	806.282	727.157	770.739	656.042	747.449	656.56	695.325	1.05827e-06	6.22407e-05	2.89544e-09	5.02979e-06	8.22352e-08	7.29497e-08	2.17268e-07	1.17352e-07	4.11959e-07	6.24313e-07	5	5	763.583	705.223	29.5404	52.3453	0.0385577	0.0739029	2.8826	2.84738	0.0167392	0.0320519	-0.117002	-1.15762	-1.90004	0.131615	0	0	0	0	0	0
sp|Q96KP4|CNDP2_HUMAN	Q96KP4	sp|Q96KP4|CNDP2_HUMAN	>sp|Q96KP4|CNDP2_HUMAN Cytosolic non-specific dipeptidase OS=Homo sapiens GN=CNDP2 PE=1 SV=2	CNDP2	CNDP2	55748	3	744.724	594.402	604.738	838.392	590.046	718.123	691.748	733.249	737.103	682.83	3.4818e-07	2.91131e-08	1.82195e-07	8.05566e-05	4.45234e-07	1.38701e-07	3.64104e-08	1.94766e-07	5.11997e-08	1.35384e-08	5	5	674.461	712.611	112.034	24.3843	0.160997	0.0343636	2.8244	2.85265	0.0694731	0.0149195	0.0938531	0.56896	0.945109	0.449167	0	1	0	0	0	0
tr|E9PS15|E9PS15_HUMAN	E9PS15	tr|E9PS15|E9PS15_HUMAN	>tr|E9PS15|E9PS15_HUMAN Isoform of Q6PI25, Protein cornichon homolog 2 OS=Homo sapiens GN=CNIH2 PE=1 SV=1	CNIH2	CNIH2	254263	1	138.617	169.135	142.362	126.697	140.908	83.7351	104.809	110.295	100.115	100.007	3.36556e-09	6.55052e-07	5.1261e-10	2.26914e-08	2.99404e-08	2.58237e-05	1.60251e-08	2.36592e-09	6.9903e-09	4.94548e-09	5	5	143.544	99.7922	15.5832	9.91781	0.105207	0.104111	2.15503	1.99728	0.0455651	0.0450929	-0.524036	-1.68748	-5.7392	0.000711773	-1	0	0	0	0	0
sp|Q8WXI2-4|CNKR2_HUMAN;sp|Q8WXI2|CNKR2_HUMAN	Q8WXI2-4;Q8WXI2	sp|Q8WXI2-4|CNKR2_HUMAN;sp|Q8WXI2|CNKR2_HUMAN	>sp|Q8WXI2-4|CNKR2_HUMAN Isoform of Q8WXI2, Isoform 3 of Connector enhancer of kinase suppressor of ras 2 OS=Homo sapiens GN=CNKSR2;>sp|Q8WXI2|CNKR2_HUMAN Connector enhancer of kinase suppressor of ras 2 OS=Homo sapiens GN=CNKSR2 PE=1 SV=1	CNKSR2	CNKSR2	22866	14	1550.08	1619.51	1486.24	1769.25	1306.1	2405.26	2244.63	2416.76	2210.32	2506.3	4.65924e-05	8.92463e-07	1.405e-06	1.96392e-06	7.91604e-06	1.66711e-06	1.66324e-07	7.12121e-08	6.47733e-07	1.28597e-07	5	5	1546.24	2356.65	170.573	124.832	0.112413	0.0532267	3.18712	3.37181	0.048667	0.0230997	0.613518	1.78007	7.68189	0.000101901	1	1	0	0	0	0
sp|Q15417-3|CNN3_HUMAN	Q15417-3	sp|Q15417-3|CNN3_HUMAN	>sp|Q15417-3|CNN3_HUMAN Isoform of Q15417, Isoform 3 of Calponin-3 OS=Homo sapiens GN=CNN3	CNN3	CNN3	1266	1	58.3713	60.3076	39.5853	99.4007	50.6111	58.2747	56.07	62.18	56.1791	66.6104	0.255545	0.341404	0.0889534	0.169285	0.332907	1.76123e-08	4.52923e-06	1.79068e-05	0.000351112	2.06208e-06	5	5	61.6552	59.8629	22.6184	4.51045	0.347249	0.0740369	1.76915	1.7762	0.146537	0.0321099	0.0234119	0.0704217	0.119824	0.934897	0	1	0	0	0	0
sp|Q9NRU3-2|CNNM1_HUMAN	Q9NRU3-2	sp|Q9NRU3-2|CNNM1_HUMAN	>sp|Q9NRU3-2|CNNM1_HUMAN Isoform of Q9NRU3, Isoform 2 of Metal transporter CNNM1 OS=Homo sapiens GN=CNNM1	CNNM1	CNNM1	26507	1	109.618	102.437	107.295	97.6408	106.327	81.3994	86.7352	93.1115	93.3913	83.6232	4.41024e-05	0.00471791	0.000232642	0.00938179	0.00447888	2.8676e-05	2.05771e-06	3.42273e-05	3.72974e-05	9.32503e-05	5	5	104.663	87.6521	4.70402	5.45238	0.0455403	0.0622359	2.01944	1.94209	0.0197677	0.0270026	-0.256942	-1.66441	-4.35083	0.00389422	-1	0	0	0	0	0
sp|Q9H8M5|CNNM2_HUMAN	Q9H8M5	sp|Q9H8M5|CNNM2_HUMAN	>sp|Q9H8M5|CNNM2_HUMAN Metal transporter CNNM2 OS=Homo sapiens GN=CNNM2 PE=1 SV=2	CNNM2	CNNM2	54805	1	82.6436	83.595	76.712	65.3598	77.1318	58.0098	48.871	62.1964	39.3815	58.8205	0.000118642	3.97077e-08	4.4727e-05	9.20642e-05	1.51471e-05	8.01035e-07	7.57514e-05	5.96975e-05	2.74644e-06	4.26091e-05	5	5	77.0884	53.4559	7.2612	9.28742	0.0984745	0.188245	1.88536	1.72223	0.0426638	0.0810431	-0.541911	-1.54696	-4.38429	0.00371703	-1	0	0	0	0	0
sp|A5YKK6-2|CNOT1_HUMAN	A5YKK6-2	sp|A5YKK6-2|CNOT1_HUMAN	>sp|A5YKK6-2|CNOT1_HUMAN Isoform of A5YKK6, Isoform 2 of CCR4-NOT transcription complex subunit 1 OS=Homo sapiens GN=CNOT1	CNOT1	CNOT1	23019	1	53.2306	49.992	38.6219	61.3427	35.7822	47.9018	50.257	50.6987	44.251	46.2169	0.00105416	0.0329652	0.00027589	0.00026595	0.00217795	1.74354e-06	1.02869e-08	4.95418e-06	2.99029e-05	7.18262e-07	5	5	47.7939	47.8651	10.5637	2.71708	0.228218	0.0572071	1.67067	1.67945	0.0978583	0.0248245	0.0291953	0.130271	0.216383	0.87659	0	1	0	0	0	0
sp|P09543|CN37_HUMAN	P09543	sp|P09543|CN37_HUMAN	>sp|P09543|CN37_HUMAN 2',3'-cyclic-nucleotide 3'-phosphodiesterase OS=Homo sapiens GN=CNP PE=1 SV=2	CNP	CNP	1267	3	3490.9	2587.76	2617.53	3526.77	3650.83	3312.43	3677.7	3671.22	5349.23	4253.92	3.17546e-08	1.50035e-07	1.47067e-09	1.00687e-06	5.82161e-08	7.50469e-08	2.35994e-08	4.88452e-08	4.95308e-08	2.34188e-08	5	5	3174.76	4052.9	525.73	799.316	0.173008	0.187528	3.4967	3.60152	0.074583	0.0807398	0.348199	1.1422	2.38757	0.0652204	0	1	0	0	0	0
sp|P26992|CNTFR_HUMAN	P26992	sp|P26992|CNTFR_HUMAN	>sp|P26992|CNTFR_HUMAN Ciliary neurotrophic factor receptor subunit alpha OS=Homo sapiens GN=CNTFR PE=1 SV=2	CNTFR	CNTFR	1271	1	227.654	233.81	227.545	222.673	237.503	205.874	177.135	206.751	206.895	223.111	2.87829e-05	4.84508e-06	5.91294e-06	2.1974e-06	1.01288e-05	2.78488e-08	1.59296e-09	1.41855e-07	7.98634e-09	2.46728e-09	5	5	229.837	203.953	5.8287	16.6311	0.0253229	0.0843732	2.36131	2.30833	0.0109958	0.0365778	-0.176006	-1.402	-2.76998	0.0370751	0	0	0	0	0	0
sp|Q12860|CNTN1_HUMAN	Q12860	sp|Q12860|CNTN1_HUMAN	>sp|Q12860|CNTN1_HUMAN Contactin-1 OS=Homo sapiens GN=CNTN1 PE=1 SV=1	CNTN1	CNTN1	1272	12	16406.9	19856.4	16554.4	17040.6	16338.7	12836.6	13343	13436.9	12791.4	14219	1.50976e-08	5.91101e-08	1.29319e-09	2.43203e-08	5.83804e-08	1.46323e-08	3.17652e-09	9.94376e-09	1.89345e-08	1.64243e-08	5	5	17239.4	13325.4	1488.43	577.79	0.0823618	0.0428881	4.23531	4.12436	0.0357088	0.0186175	-0.368571	-1.72432	-5.6196	0.000819081	-1	0	0	0	0	0
sp|Q02246|CNTN2_HUMAN	Q02246	sp|Q02246|CNTN2_HUMAN	>sp|Q02246|CNTN2_HUMAN Contactin-2 OS=Homo sapiens GN=CNTN2 PE=1 SV=1	CNTN2	CNTN2	6900	5	538.921	535.601	551.291	519.41	531.11	491.924	457.148	513.459	535.325	452.789	2.27564e-07	2.59656e-06	8.93169e-08	6.39031e-07	2.05554e-06	4.33169e-07	0.000267018	0.000120227	9.71231e-07	1.53542e-07	5	5	535.267	490.129	11.6076	35.6098	0.0216916	0.0726661	2.72849	2.68939	0.00941945	0.0315169	-0.129867	-1.2992	-2.21867	0.0834958	0	0	0	0	0	0
sp|P78357|CNTP1_HUMAN	P78357	sp|P78357|CNTP1_HUMAN	>sp|P78357|CNTP1_HUMAN Contactin-associated protein 1 OS=Homo sapiens GN=CNTNAP1 PE=1 SV=1	CNTNAP1	CNTNAP1	8506	13	7188.22	7896.04	6880.39	7552.59	7463.71	5877.53	5297.1	5970.54	5933.08	6262.21	1.35972e-08	1.03031e-08	5.11363e-10	1.10534e-08	1.10604e-08	7.54464e-09	2.02484e-09	9.31845e-09	4.79882e-09	1.13821e-09	5	5	7396.19	5868.09	383.459	352.194	0.0520699	0.0615344	3.86854	3.76785	0.0225984	0.0266988	-0.334478	-1.73705	-5.53204	0.000915611	-1	0	0	0	0	0
sp|Q9Y2R0|COA3_HUMAN	Q9Y2R0	sp|Q9Y2R0|COA3_HUMAN	>sp|Q9Y2R0|COA3_HUMAN Cytochrome c oxidase assembly factor 3 homolog, mitochondrial OS=Homo sapiens GN=COA3 PE=1 SV=1	COA3	COA3	28958	1	285.728	220.409	256.589	248.443	279.209	284.009	298.614	307.161	355.242	298.931	1.87124e-09	3.31102e-08	1.26662e-10	2.60185e-08	4.43848e-09	1.20139e-09	2.73536e-09	1.68338e-09	1.18572e-09	4.69168e-10	5	5	258.076	308.791	26.1009	27.273	0.103764	0.0850012	2.40992	2.48838	0.0449434	0.0368491	0.260656	1.38461	3.08255	0.0234782	0	1	0	0	0	0
sp|Q9P000-2|COMD9_HUMAN	Q9P000-2	sp|Q9P000-2|COMD9_HUMAN	>sp|Q9P000-2|COMD9_HUMAN Isoform of Q9P000, Isoform 2 of COMM domain-containing protein 9 OS=Homo sapiens GN=COMMD9	COMMD9	COMMD9	29099	1	78.5709	82.0062	70.2242	98.3953	74.4607	77.6417	96.0422	89.4396	76.1726	104.106	0.000595664	0.00138271	0.00159453	0.00205328	0.00336074	1.10391e-07	1.99366e-06	1.19527e-05	3.60058e-05	4.15472e-07	5	5	80.7314	88.6805	10.817	11.9481	0.128868	0.135406	1.9041	1.94467	0.0557364	0.0585393	0.134782	0.699853	1.21682	0.325831	0	1	0	0	0	0
sp|P53621|COPA_HUMAN	P53621	sp|P53621|COPA_HUMAN	>sp|P53621|COPA_HUMAN Coatomer subunit alpha OS=Homo sapiens GN=COPA PE=1 SV=2	COPA	COPA	1314	1	852.66	81.6119	57.9905	47.9118	45.3015	57.8674	85.4228	65.2992	71.3431	73.7217	0.197372	0.0449873	3.56484e-05	0.000633654	0.00097453	9.13074e-05	3.81099e-07	3.26191e-05	0.000375853	1.76411e-06	5	5	217.095	70.7308	355.58	10.2487	1.89498	0.145445	1.98849	1.84597	0.536154	0.0628357	-0.473427	-0.387654	-0.687373	0.590239	0	0	0	0	0	0
sp|P35606-2|COPB2_HUMAN	P35606-2	sp|P35606-2|COPB2_HUMAN	>sp|P35606-2|COPB2_HUMAN Isoform of P35606, Isoform 2 of Coatomer subunit beta' OS=Homo sapiens GN=COPB2	COPB2	COPB2	9276	1	47.3648	61.0683	33.423	45.121	36.594	50.5485	53.8644	59.5386	38.5405	59.6422	0.000230338	1.42549e-06	0.103747	0.00198288	0.0637943	1.64564e-05	5.0874e-05	0.000167916	1.90329e-08	1.2677e-05	5	5	44.7142	52.4268	10.8175	8.6756	0.239371	0.180906	1.64062	1.71426	0.102513	0.077935	0.24461	0.781571	1.44716	0.243215	0	1	0	0	0	0
sp|P61201|CSN2_HUMAN	P61201	sp|P61201|CSN2_HUMAN	>sp|P61201|CSN2_HUMAN COP9 signalosome complex subunit 2 OS=Homo sapiens GN=COPS2 PE=1 SV=1	COPS2	COPS2	9318	7	795.549	802.069	907.604	782.843	933.601	835.162	757.657	782.417	692.633	722.088	2.17795e-06	4.96483e-05	9.36388e-07	0.000290556	1.3033e-06	1.21983e-06	2.53613e-07	1.90957e-06	1.34672e-06	8.13284e-06	5	5	844.333	757.991	70.5678	55.0291	0.0825744	0.0723262	2.92532	2.87876	0.0358007	0.0313699	-0.154693	-1.16079	-2.11565	0.0963656	0	0	0	0	0	0
tr|H7C3P9|H7C3P9_HUMAN	H7C3P9	tr|H7C3P9|H7C3P9_HUMAN	>tr|H7C3P9|H7C3P9_HUMAN Isoform of Q9UNS2, COP9 signalosome complex subunit 3 OS=Homo sapiens GN=COPS3 PE=1 SV=2	COPS3	COPS3	8533	2	209.089	217.866	195.187	236.53	216.854	223.571	213.374	203.032	211.067	203.765	6.02342e-05	0.000149055	2.90198e-05	0.0026904	0.000464449	3.66795e-06	6.27542e-06	4.9914e-05	0.000112305	3.39308e-05	5	5	215.105	210.962	15.0218	8.35902	0.0698533	0.0392905	2.33181	2.32393	0.0303	0.0170571	-0.0261477	-0.334249	-0.433862	0.740383	0	0	0	0	0	0
sp|Q9BT78|CSN4_HUMAN	Q9BT78	sp|Q9BT78|CSN4_HUMAN	>sp|Q9BT78|CSN4_HUMAN COP9 signalosome complex subunit 4 OS=Homo sapiens GN=COPS4 PE=1 SV=1	COPS4	COPS4	51138	7	722.948	690.927	713.407	698.962	754.82	689.605	649.982	614.98	654.722	621.149	1.92455e-07	1.37122e-06	5.43161e-08	1.41729e-06	6.24236e-07	8.02407e-07	5.20151e-08	1.15703e-07	1.19618e-07	7.65706e-08	5	5	716.213	646.088	24.9033	29.8875	0.0344509	0.0459646	2.85483	2.80992	0.0149574	0.0199516	-0.149193	-1.5527	-2.88215	0.0310556	0	0	0	0	0	0
sp|Q92905|CSN5_HUMAN	Q92905	sp|Q92905|CSN5_HUMAN	>sp|Q92905|CSN5_HUMAN COP9 signalosome complex subunit 5 OS=Homo sapiens GN=COPS5 PE=1 SV=4	COPS5	COPS5	10987	3	302.714	280.296	332.195	222.924	325.167	345.487	314.499	324.941	295.327	271.279	6.26648e-06	3.04942e-07	3.27993e-06	5.26323e-05	3.48144e-07	7.224e-08	2.76668e-07	1.24037e-07	1.2839e-07	3.93512e-07	5	5	292.659	310.307	43.9794	28.3588	0.162097	0.0927918	2.46206	2.49031	0.0699419	0.0402126	0.0938573	0.506263	0.848725	0.500284	0	1	0	0	0	0
tr|E7EM64|E7EM64_HUMAN	E7EM64	tr|E7EM64|E7EM64_HUMAN	>tr|E7EM64|E7EM64_HUMAN Isoform of Q7L5N1, COP9 signalosome complex subunit 6 OS=Homo sapiens GN=COPS6 PE=1 SV=1	COPS6	COPS6	10980	2	187.048	199.73	172.274	189.005	168.731	153.637	166.618	159.426	159.682	133.403	6.37023e-05	0.00196517	8.00179e-06	0.00481789	0.000493426	1.38606e-05	1.83299e-06	0.000550446	6.70164e-05	5.05843e-06	5	5	183.358	154.553	12.7512	12.6865	0.0697497	0.0857896	2.26246	2.18784	0.0302552	0.0371897	-0.247876	-1.47242	-3.37337	0.0156126	0	0	0	0	0	0
tr|F8VVX6|F8VVX6_HUMAN	F8VVX6	tr|F8VVX6|F8VVX6_HUMAN	>tr|F8VVX6|F8VVX6_HUMAN Isoform of Q5HYK3, 2-methoxy-6-polyprenyl-1,4-benzoquinol methylase, mitochondrial (Fragment) OS=Homo sapiens GN=COQ5 PE=1 SV=1	COQ5	COQ5	84274	1	92.0035	79.6323	83.9602	91.6105	67.3937	126.512	118.479	142.778	130.775	146.249	0.000545249	7.1421e-05	2.15214e-07	4.52741e-05	8.68852e-05	4.22402e-09	8.36226e-10	1.28117e-09	7.13156e-09	1.91273e-09	5	5	82.9201	132.959	10.1365	11.5008	0.128307	0.0869817	1.91591	2.12241	0.0554956	0.0377045	0.685991	1.75495	7.24193	0.000147721	1	1	0	0	0	0
sp|Q9Y2Z9-3|COQ6_HUMAN	Q9Y2Z9-3	sp|Q9Y2Z9-3|COQ6_HUMAN	>sp|Q9Y2Z9-3|COQ6_HUMAN Isoform of Q9Y2Z9, Isoform 3 of Ubiquinone biosynthesis monooxygenase COQ6, mitochondrial OS=Homo sapiens GN=COQ6	COQ6	COQ6	51004	2	291.482	231.209	259.619	236.207	242.127	158.001	147.54	168.144	210.129	187.19	7.34126e-06	0.001071	1.05826e-06	3.42606e-05	1.48501e-06	0.0028191	0.000257554	0.00025024	2.84805e-05	1.32043e-05	5	5	252.129	174.201	24.4743	24.8468	0.0940481	0.140679	2.40006	2.2376	0.0407547	0.060797	-0.539659	-1.64846	-5.30172	0.0011725	-1	0	0	0	0	0
tr|H0YHF1|H0YHF1_HUMAN	H0YHF1	tr|H0YHF1|H0YHF1_HUMAN	>tr|H0YHF1|H0YHF1_HUMAN Isoform of Q96MF6, Coenzyme Q-binding protein COQ10 homolog A, mitochondrial (Fragment) OS=Homo sapiens GN=COQ10A PE=1 SV=1	COQ10A	COQ10A	93058	1	56.8837	47.5486	41.6093	39.5576	42.9839	84.8747	96.9648	83.8023	87.9768	79.6747	0.000591004	1.05513e-05	6.43166e-06	0.0202241	0.000180051	1.86197e-07	1.79535e-07	2.15793e-06	3.29313e-09	4.64309e-08	5	5	45.7166	86.6587	6.89804	6.48212	0.144396	0.0733236	1.65637	1.93687	0.0623871	0.0318013	0.931791	1.8093	9.49767	2.3983e-05	1	1	0	0	0	0
sp|P31146|COR1A_HUMAN	P31146	sp|P31146|COR1A_HUMAN	>sp|P31146|COR1A_HUMAN Coronin-1A OS=Homo sapiens GN=CORO1A PE=1 SV=4	CORO1A	CORO1A	11151	3	2856.98	2938.62	3101.45	2819.15	2906.81	2958.84	2519.93	2596.54	2310.25	2681.91	1.39267e-07	5.43162e-08	2.55391e-09	9.55321e-09	1.65344e-07	1.60508e-07	3.95908e-08	3.7207e-08	4.6034e-08	1.63441e-08	5	5	2924.6	2613.5	108.951	237.14	0.0367597	0.090461	3.46583	3.4158	0.0159591	0.0392067	-0.166191	-1.29535	-2.45634	0.0589113	0	0	0	0	0	0
sp|Q9BR76|COR1B_HUMAN	Q9BR76	sp|Q9BR76|COR1B_HUMAN	>sp|Q9BR76|COR1B_HUMAN Coronin-1B OS=Homo sapiens GN=CORO1B PE=1 SV=1	CORO1B	CORO1B	57175	3	621.753	637.686	709.304	640.022	685.458	750.18	742.279	689.765	752.672	653.581	2.7602e-08	5.4505e-07	1.44971e-08	2.87471e-08	1.06782e-07	5.60022e-06	1.00278e-07	2.44307e-06	6.9576e-08	6.58974e-08	5	5	658.845	717.696	36.8518	44.0845	0.0554269	0.0626693	2.81825	2.85527	0.0240532	0.0271903	0.122982	1.19087	1.99275	0.114718	0	1	0	0	0	0
sp|Q9ULV4|COR1C_HUMAN	Q9ULV4	sp|Q9ULV4|COR1C_HUMAN	>sp|Q9ULV4|COR1C_HUMAN Coronin-1C OS=Homo sapiens GN=CORO1C PE=1 SV=1	CORO1C	CORO1C	23603	5	1955.12	2150.94	2066.39	1906.25	1931.7	1526.87	1394.14	1513.63	1431.7	1344.88	3.85524e-08	1.22392e-08	1.02772e-09	6.76129e-09	2.39548e-09	2.49337e-08	4.35299e-09	1.16411e-08	4.63623e-09	2.05265e-07	5	5	2002.08	1442.25	103.244	77.7213	0.0509926	0.0540493	3.30103	3.15853	0.0221314	0.0234562	-0.473352	-1.82409	-8.16858	6.9207e-05	-1	0	0	0	0	0
sp|Q9UQ03-2|COR2B_HUMAN	Q9UQ03-2	sp|Q9UQ03-2|COR2B_HUMAN	>sp|Q9UQ03-2|COR2B_HUMAN Isoform of Q9UQ03, Isoform 2 of Coronin-2B OS=Homo sapiens GN=CORO2B	CORO2B	CORO2B	10391	3	862.804	823.149	753.132	753.436	819.252	590.15	589.073	704.961	639.071	621.644	7.80464e-09	5.48885e-08	3.9374e-08	8.09302e-08	1.48518e-07	9.59023e-09	1.15426e-08	1.5303e-09	7.03273e-09	2.3677e-07	5	5	802.354	628.98	47.927	47.5107	0.0598875	0.0738051	2.90374	2.79768	0.0259855	0.0320096	-0.352349	-1.70268	-5.29482	0.00117652	-1	0	0	0	0	0
sp|P20674|COX5A_HUMAN	P20674	sp|P20674|COX5A_HUMAN	>sp|P20674|COX5A_HUMAN Cytochrome c oxidase subunit 5A, mitochondrial OS=Homo sapiens GN=COX5A PE=1 SV=2	COX5A	COX5A	9377	1	593.323	249.538	272.978	397.477	251.287	159.07	213.232	447.8	302.867	165.331	9.83521e-08	2.30925e-05	7.36968e-08	9.74723e-08	3.016e-07	0.000289654	6.35366e-06	7.2989e-07	1.52473e-05	0.00910228	5	5	352.921	257.66	147.637	120.846	0.390214	0.459011	2.52121	2.37623	0.1635	0.189897	-0.481618	-0.789216	-1.49682	0.228683	0	0	0	0	0	0
sp|P14854|CX6B1_HUMAN	P14854	sp|P14854|CX6B1_HUMAN	>sp|P14854|CX6B1_HUMAN Cytochrome c oxidase subunit 6B1 OS=Homo sapiens GN=COX6B1 PE=1 SV=2	COX6B1	COX6B1	1340	1	645.317	359.609	377.251	275.143	500.939	306.956	441.322	561.586	523.843	325.851	3.78568e-09	6.62285e-09	4.36048e-11	2.46242e-08	7.28972e-09	1.46883e-09	4.33267e-09	2.65855e-09	6.09302e-10	2.30541e-10	5	5	431.652	431.912	144.134	114.256	0.336371	0.278298	2.61632	2.62269	0.142188	0.118617	0.0211886	0.0516507	0.0885249	0.950611	0	1	0	0	0	0
sp|O14548|COX7R_HUMAN	O14548	sp|O14548|COX7R_HUMAN	>sp|O14548|COX7R_HUMAN Cytochrome c oxidase subunit 7A-related protein, mitochondrial OS=Homo sapiens GN=COX7A2L PE=1 SV=2	COX7A2L	COX7A2L	9167	1	203.268	153.395	192.594	177.071	206.447	1347.18	1310.52	1365.88	1424.91	1412.55	8.89734e-06	1.04421e-07	4.12311e-05	2.6845e-06	6.55887e-07	1.29664e-07	7.87601e-08	5.37252e-09	5.28899e-08	7.96161e-08	5	5	186.555	1372.21	21.8002	47.1085	0.122417	0.0344148	2.2683	3.13721	0.0529672	0.0149418	2.88649	1.89131	35.5732	2.46731e-09	1	1	0	0	0	0
tr|D6R9Z7|D6R9Z7_HUMAN	D6R9Z7	tr|D6R9Z7|D6R9Z7_HUMAN	>tr|D6R9Z7|D6R9Z7_HUMAN Isoform of P15954, Cytochrome c oxidase subunit 7C, mitochondrial OS=Homo sapiens GN=COX7C PE=1 SV=1	COX7C	COX7C	1350	1	2705.35	2627.84	2974.94	2732.25	3332.51	565.948	660.922	1034.89	976.016	623.461	1.22511e-08	3.12885e-07	2.44995e-09	5.80346e-08	4.32818e-08	9.00061e-10	1.54621e-09	1.11068e-09	5.92168e-10	5.61588e-10	5	5	2874.58	772.247	287.031	216.558	0.096752	0.280259	3.45692	2.87442	0.041921	0.119422	-1.93503	-1.82953	-11.6358	5.87483e-06	-1	0	0	0	0	0
sp|Q7KZN9-2|COX15_HUMAN	Q7KZN9-2	sp|Q7KZN9-2|COX15_HUMAN	>sp|Q7KZN9-2|COX15_HUMAN Isoform of Q7KZN9, Isoform 2 of Cytochrome c oxidase assembly protein COX15 homolog OS=Homo sapiens GN=COX15	COX15	COX15	1355	2	163.066	117.574	106.575	109.886	141.149	245.776	241.902	222.319	243.505	264.41	0.000747156	0.0554646	0.209587	0.0216619	0.000782984	2.53479e-05	5.46848e-07	7.68408e-05	1.12304e-06	4.84819e-06	5	5	127.65	243.582	23.9675	14.9462	0.182417	0.0616859	2.10019	2.38599	0.0785752	0.0267644	0.949399	1.78098	8.37586	5.74909e-05	1	1	0	0	0	0
sp|O75976|CBPD_HUMAN	O75976	sp|O75976|CBPD_HUMAN	>sp|O75976|CBPD_HUMAN Carboxypeptidase D OS=Homo sapiens GN=CPD PE=1 SV=2	CPD	CPD	1362	1	65.8321	129.399	87.8764	74.5521	55.0525	83.9604	152.468	85.4653	90.4175	99.7116	2.71052e-05	0.000119501	2.15915e-05	0.0353618	0.0562738	4.95401e-07	5.3673e-09	8.08481e-08	1.81562e-06	2.56723e-05	5	5	82.5424	102.405	28.8217	28.6551	0.333514	0.250401	1.8975	1.99881	0.141041	0.107099	0.336554	0.781873	1.46821	0.236908	0	1	0	0	0	0
sp|P16870-2|CBPE_HUMAN	P16870-2	sp|P16870-2|CBPE_HUMAN	>sp|P16870-2|CBPE_HUMAN Isoform of P16870, Isoform 2 of Carboxypeptidase E OS=Homo sapiens GN=CPE	CPE	CPE	1363	3	1254.44	1115.12	1306.68	1116.61	1196.21	1251.7	1338.79	1189.83	1261.96	1254.93	6.03164e-09	7.7955e-09	2.72678e-10	7.4018e-09	9.12009e-09	6.96686e-09	1.64135e-09	2.75572e-09	4.10468e-09	6.77355e-10	5	5	1197.81	1259.44	84.3977	52.9845	0.0703147	0.0419073	3.07753	3.09987	0.0304996	0.0181921	0.0742224	0.844978	1.21746	0.325831	0	1	0	0	0	0
tr|D6RI11|D6RI11_HUMAN	D6RI11	tr|D6RI11|D6RI11_HUMAN	>tr|D6RI11|D6RI11_HUMAN Isoform of O14810, Complexin-1 OS=Homo sapiens GN=CPLX1 PE=1 SV=1	CPLX1	CPLX1	10815	1	378.264	404.77	381.529	330.297	356.23	610.685	584.044	514.946	507.493	579.303	7.55083e-09	9.63824e-09	2.44589e-10	7.0347e-09	2.8881e-09	3.17145e-08	1.08329e-08	4.39298e-09	3.66608e-09	5.67818e-08	5	5	370.218	559.294	28.1777	45.5633	0.0772581	0.0824089	2.56743	2.74647	0.0335028	0.0357292	0.594755	1.79305	7.97451	8.11971e-05	1	1	0	0	0	0
sp|Q6PUV4|CPLX2_HUMAN	Q6PUV4	sp|Q6PUV4|CPLX2_HUMAN	>sp|Q6PUV4|CPLX2_HUMAN Complexin-2 OS=Homo sapiens GN=CPLX2 PE=2 SV=2	CPLX2	CPLX2	10814	5	3813.08	4801.66	4513.97	4834.41	4025.35	5569.62	5103.79	4212	4544.38	4942.95	7.00806e-08	6.14586e-08	1.89486e-09	1.23169e-08	9.91197e-09	1.09222e-08	8.0857e-10	2.03674e-08	2.44211e-08	8.8127e-09	5	5	4397.69	4874.55	460.393	521.618	0.106888	0.107817	3.64127	3.68593	0.0462892	0.0466893	0.148354	0.89765	1.5921	0.201299	0	1	0	0	0	0
tr|F2Z2V0|F2Z2V0_HUMAN	F2Z2V0	tr|F2Z2V0|F2Z2V0_HUMAN	>tr|F2Z2V0|F2Z2V0_HUMAN Isoform of Q99829, Copine-1 (Fragment) OS=Homo sapiens GN=CPNE1 PE=1 SV=1	CPNE1	CPNE1	8904	3	349.443	419.468	367.573	354.778	364.66	306.78	263.57	324.346	256.975	308.866	2.12255e-07	6.71004e-07	5.38992e-08	4.29938e-06	2.20251e-08	5.02879e-07	3.53298e-06	7.89792e-08	7.33809e-07	1.45734e-06	5	5	371.184	292.107	27.9677	29.9336	0.0726004	0.10441	2.56865	2.46368	0.0314885	0.045222	-0.348718	-1.58065	-4.29351	0.00418812	-1	0	0	0	0	0
sp|Q96FN4|CPNE2_HUMAN	Q96FN4	sp|Q96FN4|CPNE2_HUMAN	>sp|Q96FN4|CPNE2_HUMAN Copine-2 OS=Homo sapiens GN=CPNE2 PE=1 SV=3	CPNE2	CPNE2	221184	1	80.8216	82.635	106.816	75.2469	135.39	35.228	40.6196	46.3653	51.4422	24.4605	7.5333e-05	1.20384e-05	1.04448e-06	8.16697e-06	1.05682e-05	0.187918	0.00256336	0.00858493	0.0514897	0.403535	5	5	96.182	39.6231	25.0406	10.4327	0.247805	0.29557	1.97228	1.58432	0.106021	0.125686	-1.28878	-1.67221	-6.03994	0.000501836	-1	0	0	0	0	0
sp|Q96A23|CPNE4_HUMAN	Q96A23	sp|Q96A23|CPNE4_HUMAN	>sp|Q96A23|CPNE4_HUMAN Copine-4 OS=Homo sapiens GN=CPNE4 PE=1 SV=1	CPNE4	CPNE4	131034	10	2199.4	2452.27	2267.04	2129.67	2103.2	2459.8	2683.01	2846.5	2602.97	2654.29	4.34555e-08	6.15094e-07	9.96228e-08	3.64056e-07	2.67849e-07	3.92341e-08	1.80144e-08	4.85389e-08	2.07841e-08	1.80957e-08	5	5	2230.32	2649.31	139.512	139.74	0.0613482	0.0527896	3.3477	3.42265	0.0266182	0.0229103	0.248962	1.63218	4.10864	0.00547497	0	1	0	0	0	0
sp|Q9HCH3|CPNE5_HUMAN	Q9HCH3	sp|Q9HCH3|CPNE5_HUMAN	>sp|Q9HCH3|CPNE5_HUMAN Copine-5 OS=Homo sapiens GN=CPNE5 PE=1 SV=2	CPNE5	CPNE5	57699	2	155.991	164.491	182.827	104.085	156.91	242.122	201.157	201.262	202.1	222.039	0.0185846	0.0562056	0.111454	0.00116397	0.00464645	3.65847e-08	4.01799e-09	1.61076e-08	4.10179e-08	5.05515e-08	5	5	152.861	213.736	29.3196	18.1929	0.217423	0.0828951	2.17686	2.32867	0.0933374	0.0359392	0.504274	1.45754	3.76934	0.00865295	0	1	0	0	0	0
sp|O95741|CPNE6_HUMAN	O95741	sp|O95741|CPNE6_HUMAN	>sp|O95741|CPNE6_HUMAN Copine-6 OS=Homo sapiens GN=CPNE6 PE=1 SV=3	CPNE6	CPNE6	9362	9	11684.4	13722.6	12367.4	12152.9	10714.8	6486.32	7430.49	6921.33	6650.31	6006.05	2.6726e-08	2.10018e-08	2.25779e-09	5.20899e-08	2.31686e-08	1.32292e-08	6.29168e-09	5.48328e-09	9.29761e-09	1.3276e-08	5	5	12128.4	6698.9	1094.84	527.328	0.0900877	0.0788492	4.0824	3.82493	0.0390455	0.0341907	-0.855297	-1.83854	-11.005	8.90709e-06	-1	0	0	0	0	0
sp|Q9UBL6-2|CPNE7_HUMAN	Q9UBL6-2	sp|Q9UBL6-2|CPNE7_HUMAN	>sp|Q9UBL6-2|CPNE7_HUMAN Isoform of Q9UBL6, Isoform 2 of Copine-7 OS=Homo sapiens GN=CPNE7	CPNE7	CPNE7	27132	2	545.285	468.26	554.943	492.5	452.404	689.356	652.796	626.471	604.349	626.994	1.40304e-07	3.60544e-07	1.18416e-08	3.77497e-07	9.25218e-08	1.48232e-07	7.96213e-09	4.48218e-08	3.30761e-08	7.45951e-09	5	5	502.678	639.993	45.7238	32.492	0.0908813	0.0502032	2.69986	2.80573	0.0393881	0.0217893	0.351714	1.67105	4.99516	0.00168661	1	1	0	0	0	0
sp|Q86YQ8|CPNE8_HUMAN	Q86YQ8	sp|Q86YQ8|CPNE8_HUMAN	>sp|Q86YQ8|CPNE8_HUMAN Copine-8 OS=Homo sapiens GN=CPNE8 PE=1 SV=2	CPNE8	CPNE8	144402	2	114.273	117.733	96.0074	73.8373	116.333	109.588	112.342	110.63	117.432	104.822	0.0140578	0.0644303	0.000207918	0.0111977	0.00399482	1.33098e-05	0.000216946	0.00100383	2.28157e-05	7.91994e-06	5	5	103.637	110.963	18.8365	4.56783	0.201265	0.041147	2.00903	2.04488	0.0865421	0.0178624	0.119119	0.579595	0.994819	0.425548	0	1	0	0	0	0
sp|P36551|HEM6_HUMAN	P36551	sp|P36551|HEM6_HUMAN	>sp|P36551|HEM6_HUMAN Oxygen-dependent coproporphyrinogen-III oxidase, mitochondrial OS=Homo sapiens GN=CPOX PE=1 SV=3	CPOX	CPOX	1371	1	131.705	114.347	98.3087	133.422	115.362	69.8249	61.8686	73.1897	57.3967	75.1586	2.34038e-07	3.08616e-06	1.93896e-06	4.4616e-07	2.31685e-07	0.000663512	9.98003e-08	8.7829e-07	1.30862e-06	2.8149e-06	5	5	118.629	67.4877	14.4199	7.58654	0.124974	0.115469	2.07154	1.82696	0.0540653	0.0499814	-0.812484	-1.77316	-7.94234	8.23835e-05	-1	0	0	0	0	0
sp|P43155-3|CACP_HUMAN	P43155-3	sp|P43155-3|CACP_HUMAN	>sp|P43155-3|CACP_HUMAN Isoform of P43155, Isoform 3 of Carnitine O-acetyltransferase OS=Homo sapiens GN=CRAT	CRAT	CRAT	1384	3	353.216	306.024	349.573	353.999	330.121	554.573	594.771	552.98	650.378	669.14	1.0383e-05	0.000665947	6.43468e-06	0.000971713	1.10198e-05	4.75943e-07	3.8582e-07	2.8094e-06	4.68951e-07	3.15762e-08	5	5	338.587	604.368	20.6414	53.6768	0.0626002	0.088555	2.529	2.77994	0.0271603	0.0383839	0.833599	1.84622	11.4966	6.52205e-06	1	1	0	0	0	0
sp|P46108-2|CRK_HUMAN	P46108-2	sp|P46108-2|CRK_HUMAN	>sp|P46108-2|CRK_HUMAN Isoform of P46108, Isoform Crk-I of Adapter molecule crk OS=Homo sapiens GN=CRK	CRK	CRK	1398	1	117.306	140.922	113.926	137.289	106.968	91.018	83.4585	103.516	96.2052	69.8603	3.29076e-08	1.69858e-08	8.10673e-09	1.6464e-09	3.3761e-09	3.80902e-08	1.33266e-07	1.81925e-06	2.59152e-08	1.91581e-07	5	5	123.282	88.8116	14.9732	12.8798	0.121003	0.152155	2.08836	1.94461	0.0523601	0.0657022	-0.477545	-1.52573	-4.16907	0.00501118	0	0	0	0	0	0
sp|P46109|CRKL_HUMAN	P46109	sp|P46109|CRKL_HUMAN	>sp|P46109|CRKL_HUMAN Crk-like protein OS=Homo sapiens GN=CRKL PE=1 SV=1	CRKL	CRKL	1399	1	125.928	158.618	139.739	129.831	153.866	155.536	159.715	129.674	145.501	142.99	5.82421e-05	2.88053e-07	6.35516e-07	3.18137e-06	8.03456e-07	6.93917e-06	6.67348e-07	1.19893e-05	5.69391e-07	1.32029e-06	5	5	141.596	146.683	14.3844	11.7535	0.1017	0.0816099	2.14926	2.16524	0.0440542	0.0353839	0.0530773	0.413938	0.641299	0.615372	0	1	0	0	0	0
sp|Q14194-2|DPYL1_HUMAN;sp|Q14194|DPYL1_HUMAN	Q14194-2;Q14194	sp|Q14194-2|DPYL1_HUMAN;sp|Q14194|DPYL1_HUMAN	>sp|Q14194-2|DPYL1_HUMAN Isoform of Q14194, Isoform LCRMP-1 of Dihydropyrimidinase-related protein 1 OS=Homo sapiens GN=CRMP1;>sp|Q14194|DPYL1_HUMAN Dihydropyrimidinase-related protein 1 OS=Homo sapiens GN=CRMP1 PE=1 SV=1	CRMP1	CRMP1	1400	9	4430.89	4806.67	4954.77	4348.97	5335.59	5355.01	5164.27	4910.92	4868.07	4196.78	3.22313e-08	4.15522e-08	9.79275e-09	2.17741e-08	1.53613e-07	1.74687e-08	3.91726e-08	2.19944e-07	2.02914e-08	3.79009e-08	5	5	4775.38	4899.01	402.336	439.47	0.0838461	0.0932443	3.67779	3.68864	0.0363502	0.0404079	0.0360611	0.295922	0.448563	0.732758	0	1	0	0	0	0
tr|B1AKD8|B1AKD8_HUMAN	B1AKD8	tr|B1AKD8|B1AKD8_HUMAN	>tr|B1AKD8|B1AKD8_HUMAN Isoform of Q5TZA2, Rootletin (Fragment) OS=Homo sapiens GN=CROCC PE=1 SV=2	CROCC	CROCC	9696	1	324.095	384.317	334.17	311.618	379.559	131.062	106.81	199.618	223.966	149.191	1.39995e-07	1.60475e-06	9.36676e-07	9.39081e-07	1.37832e-06	3.44771e-08	4.20003e-05	5.62263e-07	7.72548e-09	4.13712e-05	5	5	346.752	162.129	33.1418	48.5331	0.0951245	0.310147	2.53845	2.19404	0.041219	0.131615	-1.14408	-1.69261	-6.34368	0.000375529	-1	0	0	0	0	0
sp|Q9NQ79-3|CRAC1_HUMAN	Q9NQ79-3	sp|Q9NQ79-3|CRAC1_HUMAN	>sp|Q9NQ79-3|CRAC1_HUMAN Isoform of Q9NQ79, Isoform 3 of Cartilage acidic protein 1 OS=Homo sapiens GN=CRTAC1	CRTAC1	CRTAC1	55118	2	340.669	350.731	322.156	362.854	326.228	186.956	219.065	235.296	247.066	242.334	3.16264e-05	9.12756e-06	4.21528e-06	3.18614e-06	3.38349e-06	0.000965268	0.0233979	0.000234107	0.00158168	0.0438743	5	5	340.528	226.144	16.9162	24.3382	0.049569	0.113595	2.53173	2.35223	0.0215143	0.0491758	-0.596267	-1.77465	-7.48585	0.000122535	-1	0	0	0	0	0
tr|E9PR44|E9PR44_HUMAN	E9PR44	tr|E9PR44|E9PR44_HUMAN	>tr|E9PR44|E9PR44_HUMAN Isoform of P02511, Alpha-crystallin B chain (Fragment) OS=Homo sapiens GN=CRYAB PE=1 SV=1	CRYAB	CRYAB	1410	1	209.703	187.787	137.022	129.738	173.32	102.387	132.228	142.417	168.302	153.135	5.7665e-05	0.000138073	5.68679e-05	9.13902e-05	5.92532e-06	1.99266e-05	4.87645e-07	5.93156e-05	1.49899e-07	2.16095e-05	5	5	167.514	139.694	33.8433	24.7694	0.207708	0.190197	2.2168	2.13926	0.0892558	0.0818689	-0.257572	-0.856794	-1.61405	0.195499	0	0	0	0	0	0
sp|Q08257|QOR_HUMAN	Q08257	sp|Q08257|QOR_HUMAN	>sp|Q08257|QOR_HUMAN Quinone oxidoreductase OS=Homo sapiens GN=CRYZ PE=1 SV=1	CRYZ	CRYZ	1429	1	116.157	123.936	140.34	109.233	134.073	59.519	53.146	68.9983	56.4871	58.0603	6.98838e-08	2.40725e-07	1.18614e-07	5.29653e-06	4.35114e-06	2.47478e-05	0.0173521	6.83256e-07	9.00141e-05	3.32266e-05	5	5	124.748	59.2421	12.701	5.94578	0.102437	0.0972519	2.09422	1.77096	0.0443717	0.0421366	-1.07386	-1.84521	-12.2024	4.42991e-06	-1	0	0	0	0	0
tr|B4DJV2|B4DJV2_HUMAN	B4DJV2	tr|B4DJV2|B4DJV2_HUMAN	>tr|B4DJV2|B4DJV2_HUMAN Isoform of O75390, Citrate synthase OS=Homo sapiens GN=CS PE=1 SV=1	CS	CS	1431	5	6996.78	6231.39	7094.48	7049.65	6334.1	11052.6	10649.9	10447	10156.5	11523.3	2.26394e-08	7.13233e-08	1.07576e-09	2.99671e-08	9.14417e-09	5.22013e-08	8.51856e-09	8.29813e-09	1.20891e-08	2.52249e-08	5	5	6741.28	10765.9	421.579	534.429	0.0634026	0.0493397	3.82805	4.03163	0.0275078	0.0214149	0.676258	1.85436	11.2053	7.90652e-06	1	1	0	0	0	0
sp|P55060-3|XPO2_HUMAN	P55060-3	sp|P55060-3|XPO2_HUMAN	>sp|P55060-3|XPO2_HUMAN Isoform of P55060, Isoform 3 of Exportin-2 OS=Homo sapiens GN=CSE1L	CSE1L	CSE1L	1434	2	405.09	420.125	420.598	355.536	335.876	364.643	326.79	258.366	307.361	303.497	6.1387e-06	1.20219e-05	1.95256e-06	1.59148e-06	8.95189e-05	5.22629e-05	4.92267e-05	0.0017161	0.000214488	5.65959e-07	5	5	387.445	312.131	39.2299	38.6016	0.103937	0.125848	2.58637	2.49164	0.045018	0.0544403	-0.31471	-1.38026	-3.18458	0.0205061	0	0	0	0	0	0
sp|P48729-3|KC1A_HUMAN	P48729-3	sp|P48729-3|KC1A_HUMAN	>sp|P48729-3|KC1A_HUMAN Isoform of P48729, Isoform 3 of Casein kinase I isoform alpha OS=Homo sapiens GN=CSNK1A1	CSNK1A1	CSNK1A1	1452	3	408.421	392.546	449.5	404.663	402.501	396.057	358.481	307.284	370.339	366.795	5.91593e-07	0.00297445	8.9305e-09	2.21091e-05	6.82313e-07	1.02847e-06	3.36169e-08	3.14477e-06	1.65119e-07	7.69138e-08	5	5	411.526	359.791	22.0254	32.5355	0.0521072	0.0941074	2.61392	2.55456	0.0226145	0.0407803	-0.197191	-1.3459	-2.73502	0.0391229	0	0	0	0	0	0
sp|P48730|KC1D_HUMAN	P48730	sp|P48730|KC1D_HUMAN	>sp|P48730|KC1D_HUMAN Casein kinase I isoform delta OS=Homo sapiens GN=CSNK1D PE=1 SV=2	CSNK1D	CSNK1D	1453	1	173.619	162.256	161.073	191.247	153.011	168.585	192.51	177.885	181.599	193.143	1.01509e-06	1.25897e-06	3.44422e-08	1.91619e-08	9.54671e-09	8.0206e-09	1.20319e-08	1.83761e-08	3.11072e-08	8.02462e-07	5	5	168.241	182.744	14.8104	10.3551	0.0861605	0.0571315	2.22463	2.26128	0.0373499	0.0247917	0.121759	1.02999	1.73396	0.165584	0	1	0	0	0	0
sp|Q9Y6M4-3|KC1G3_HUMAN	Q9Y6M4-3	sp|Q9Y6M4-3|KC1G3_HUMAN	>sp|Q9Y6M4-3|KC1G3_HUMAN Isoform of Q9Y6M4, Isoform 3 of Casein kinase I isoform gamma-3 OS=Homo sapiens GN=CSNK1G3	CSNK1G3	CSNK1G3	1456	3	507.426	459.575	460.356	418.49	437.381	381.856	386.531	452.977	405.237	372.639	2.05259e-07	6.45195e-06	2.09083e-07	2.70123e-07	3.00278e-06	1.31936e-06	4.17386e-05	2.31786e-06	1.22508e-05	1.06274e-06	5	5	456.646	399.848	33.2716	31.9887	0.0719856	0.0774903	2.65867	2.60083	0.0312226	0.0336033	-0.192147	-1.33957	-2.69484	0.0413688	0	0	0	0	0	0
tr|E7EU96|E7EU96_HUMAN	E7EU96	tr|E7EU96|E7EU96_HUMAN	>tr|E7EU96|E7EU96_HUMAN Isoform of P68400, Casein kinase II subunit alpha OS=Homo sapiens GN=CSNK2A1 PE=1 SV=1	CSNK2A1	CSNK2A1	1457	5	1243.58	1197.06	1325.47	1108.94	1194.69	1194.98	1136.04	1058.35	1149.92	1137.9	3.6935e-08	6.12174e-08	2.41722e-09	4.05272e-08	6.09705e-08	5.96232e-08	1.44448e-08	4.0027e-08	2.37626e-09	1.50755e-07	5	5	1213.95	1135.44	79.052	49.2548	0.0651234	0.0439481	3.08346	3.05483	0.0282528	0.0190772	-0.0951168	-1.04956	-1.59503	0.200506	0	0	0	0	0	0
sp|P19784|CSK22_HUMAN	P19784	sp|P19784|CSK22_HUMAN	>sp|P19784|CSK22_HUMAN Casein kinase II subunit alpha' OS=Homo sapiens GN=CSNK2A2 PE=1 SV=1	CSNK2A2	CSNK2A2	1459	3	372.773	297.937	333.526	295.981	341.616	388.796	340.834	354.674	322.761	363.475	3.76875e-07	9.59467e-05	1.47339e-08	2.50343e-05	8.34154e-07	3.05939e-08	4.42966e-06	9.93846e-07	4.32257e-07	9.54846e-07	5	5	328.367	354.108	32.2059	24.7493	0.09778	0.0698156	2.5147	2.54829	0.0423643	0.0302837	0.111583	0.861937	1.43221	0.248389	0	1	0	0	0	0
sp|P67870|CSK2B_HUMAN	P67870	sp|P67870|CSK2B_HUMAN	>sp|P67870|CSK2B_HUMAN Casein kinase II subunit beta OS=Homo sapiens GN=CSNK2B PE=1 SV=1	CSNK2B	CSNK2B	1460	4	670.378	762.225	740.422	677.276	783.387	660.861	666.229	619.711	668.126	651.823	4.24272e-06	2.58538e-08	8.32426e-08	5.52151e-09	2.10566e-08	3.95138e-05	2.4465e-07	1.09524e-06	2.59576e-05	0.000151126	5	5	726.737	653.35	50.6916	19.8401	0.0703015	0.030873	2.86052	2.81498	0.0304939	0.0134048	-0.151289	-1.39274	-2.56798	0.0500634	0	0	0	0	0	0
sp|O95196|CSPG5_HUMAN	O95196	sp|O95196|CSPG5_HUMAN	>sp|O95196|CSPG5_HUMAN Chondroitin sulfate proteoglycan 5 OS=Homo sapiens GN=CSPG5 PE=1 SV=3	CSPG5	CSPG5	10675	2	289.188	280.16	308.82	285.814	306.059	296.746	314.718	246.116	321.533	284.273	9.36165e-07	1.17724e-06	7.69306e-06	7.58226e-06	1.83941e-06	1.05494e-05	9.09072e-08	0.000145176	3.37441e-08	5.43599e-06	5	5	294.008	292.677	12.7158	29.8896	0.0431094	0.106457	2.46804	2.46448	0.0187135	0.0461035	-0.0118071	-0.106979	-0.156568	0.912406	0	0	0	0	0	0
sp|P21291|CSRP1_HUMAN	P21291	sp|P21291|CSRP1_HUMAN	>sp|P21291|CSRP1_HUMAN Cysteine and glycine-rich protein 1 OS=Homo sapiens GN=CSRP1 PE=1 SV=3	CSRP1	CSRP1	1465	3	1679.23	1660.41	1581.32	1615.42	1895.23	1691.14	1504.14	1553.37	1741.41	1960.97	3.51434e-09	3.64515e-09	1.38147e-10	1.62025e-09	2.8881e-09	2.05862e-09	4.65027e-09	1.33616e-09	4.10036e-09	3.38609e-09	5	5	1686.32	1690.21	122.9	179.778	0.0705419	0.104691	3.22606	3.22602	0.030598	0.0453427	-0.000117957	-0.000973711	-0.00146031	0.999388	0	0	0	0	0	0
sp|Q13363-2|CTBP1_HUMAN	Q13363-2	sp|Q13363-2|CTBP1_HUMAN	>sp|Q13363-2|CTBP1_HUMAN Isoform of Q13363, Isoform 2 of C-terminal-binding protein 1 OS=Homo sapiens GN=CTBP1	CTBP1	CTBP1	1487	5	2236.39	2079.15	2109.88	1923.98	2089.76	1787.52	1767.63	1981.77	1749.11	1442.65	9.51583e-09	1.15617e-08	2.63297e-09	3.0119e-08	2.84086e-08	1.9666e-08	2.94391e-09	2.75572e-09	2.126e-09	2.86184e-08	5	5	2087.83	1745.74	111.222	193.528	0.0537192	0.115526	3.3192	3.23973	0.0233131	0.0500061	-0.26397	-1.4256	-3.24705	0.018728	0	0	0	0	0	0
sp|P35221|CTNA1_HUMAN	P35221	sp|P35221|CTNA1_HUMAN	>sp|P35221|CTNA1_HUMAN Catenin alpha-1 OS=Homo sapiens GN=CTNNA1 PE=1 SV=1	CTNNA1	CTNNA1	1495	5	1479.45	1492.97	1568.21	1226.21	1792.87	1578.14	1572.54	1617.24	1901.94	1673.77	1.16714e-05	1.71554e-06	2.77451e-07	1.01909e-05	2.93296e-07	5.25743e-09	3.43363e-07	2.14043e-08	1.26169e-08	1.33574e-08	5	5	1511.94	1668.73	203.191	136.491	0.137218	0.0787187	3.17633	3.22128	0.0593154	0.0341343	0.149316	0.874357	1.551	0.212557	0	1	0	0	0	0
sp|P26232-2|CTNA2_HUMAN	P26232-2	sp|P26232-2|CTNA2_HUMAN	>sp|P26232-2|CTNA2_HUMAN Isoform of P26232, Isoform 2 of Catenin alpha-2 OS=Homo sapiens GN=CTNNA2	CTNNA2	CTNNA2	1496	16	8286.4	7556.95	7690.46	7598.93	8677.52	7094.88	7042.67	7371.62	8232.42	7260.64	3.29556e-08	2.93399e-08	9.2219e-10	7.80448e-09	2.60971e-08	1.35624e-08	6.84758e-09	1.14674e-08	4.25492e-09	4.55106e-09	5	5	7962.05	7400.45	496.696	483.201	0.0614939	0.0632095	3.90036	3.86855	0.0266812	0.0274242	-0.10568	-1.04219	-1.66149	0.183275	0	0	0	0	0	0
sp|P35222|CTNB1_HUMAN	P35222	sp|P35222|CTNB1_HUMAN	>sp|P35222|CTNB1_HUMAN Catenin beta-1 OS=Homo sapiens GN=CTNNB1 PE=1 SV=1	CTNNB1	CTNNB1	1499	12	6581.66	6221.06	6521.06	6438.2	7181.11	6239.9	5750.05	6023.54	6721.05	6067.56	2.35624e-08	3.21128e-08	7.6132e-10	2.72396e-08	1.78139e-08	7.91531e-09	4.35273e-09	1.01179e-08	4.16461e-09	5.26843e-09	5	5	6588.62	6160.42	358.256	359.301	0.0532927	0.0575576	3.81829	3.78903	0.0231283	0.0249763	-0.0972137	-1.06653	-1.63147	0.190802	0	0	0	0	0	0
sp|O60716-24|CTND1_HUMAN	O60716-24	sp|O60716-24|CTND1_HUMAN	>sp|O60716-24|CTND1_HUMAN Isoform of O60716, Isoform 3 of Catenin delta-1 OS=Homo sapiens GN=CTNND1	CTNND1	CTNND1	1500	8	977.733	863.512	976.556	916.892	1081.88	1137.03	1088.38	1038.44	1264.83	1254.44	8.56648e-07	4.23808e-07	6.3923e-08	1.56076e-07	2.82987e-07	6.27887e-08	7.65275e-08	3.62628e-07	4.119e-08	1.46922e-07	5	5	963.313	1156.63	81.4793	100.356	0.084174	0.0869857	2.98254	3.06188	0.0364918	0.0377062	0.263587	1.45533	3.3646	0.0158139	0	1	0	0	0	0
sp|Q9UQB3|CTND2_HUMAN	Q9UQB3	sp|Q9UQB3|CTND2_HUMAN	>sp|Q9UQB3|CTND2_HUMAN Catenin delta-2 OS=Homo sapiens GN=CTNND2 PE=1 SV=3	CTNND2	CTNND2	1501	7	1581.73	1679.97	1830.7	1753.4	2123.83	1401.57	1548.86	1398.06	1519.57	1550.89	8.32569e-09	2.09776e-06	3.74474e-08	4.8652e-08	2.30138e-08	1.62678e-06	9.5357e-07	7.88314e-07	7.55194e-08	1.33028e-07	5	5	1793.92	1483.79	206.062	77.6681	0.111543	0.0528405	3.25161	3.17089	0.0482928	0.0229324	-0.268142	-1.45442	-3.37635	0.015551	0	0	0	0	0	0
sp|P07339|CATD_HUMAN	P07339	sp|P07339|CATD_HUMAN	>sp|P07339|CATD_HUMAN Cathepsin D OS=Homo sapiens GN=CTSD PE=1 SV=1	CTSD	CTSD	1509	2	195.212	167.123	197.417	208.272	183.951	313.875	304.735	243.76	302.296	371.096	0.00102575	6.34533e-05	4.31974e-06	1.17923e-05	4.61746e-05	4.58347e-07	3.31045e-06	2.05037e-07	7.75104e-06	5.15239e-07	5	5	190.395	307.152	15.6141	45.2271	0.084013	0.150503	2.27845	2.48351	0.0364222	0.0649969	0.681195	1.72401	6.59285	0.000286172	1	1	0	0	0	0
sp|Q14247-3|SRC8_HUMAN	Q14247-3	sp|Q14247-3|SRC8_HUMAN	>sp|Q14247-3|SRC8_HUMAN Isoform of Q14247, Isoform 3 of Src substrate cortactin OS=Homo sapiens GN=CTTN	CTTN	CTTN	2017	2	812.792	1042	878.257	928.449	867.746	758.898	762.914	808.742	716.217	702.441	1.28084e-06	7.00035e-09	5.17275e-09	7.2287e-08	1.21232e-07	5.21124e-08	2.63143e-09	4.04145e-08	5.11022e-08	1.4877e-08	5	5	905.849	749.842	86.4887	42.1295	0.0933503	0.0559948	2.95552	2.87442	0.0404536	0.0242992	-0.269406	-1.52808	-3.70641	0.00949618	0	0	0	0	1	0
tr|F8WB16|F8WB16_HUMAN	F8WB16	tr|F8WB16|F8WB16_HUMAN	>tr|F8WB16|F8WB16_HUMAN Isoform of Q8WZ74, Cortactin-binding protein 2 OS=Homo sapiens GN=CTTNBP2 PE=1 SV=1	CTTNBP2	CTTNBP2	83992	1	113.173	135.658	116.368	84.3593	115.613	119.832	137.477	125.974	119.803	122.181	9.54442e-08	3.12174e-07	1.17005e-07	3.72686e-07	1.37744e-06	3.03889e-08	2.23875e-08	9.99406e-09	1.05335e-07	6.56216e-06	5	5	113.034	125.053	18.3838	7.38702	0.174218	0.0575246	2.04823	2.09651	0.0750972	0.024962	0.160378	0.824238	1.47454	0.235089	0	1	0	0	0	0
tr|A0A0C4DGX4|A0A0C4DGX4_HUMAN	A0A0C4DGX4	tr|A0A0C4DGX4|A0A0C4DGX4_HUMAN	>tr|A0A0C4DGX4|A0A0C4DGX4_HUMAN Isoform of Q13616, Cullin-1 OS=Homo sapiens GN=CUL1 PE=1 SV=1	CUL1	CUL1	8454	1	76.8639	66.1681	46.1499	42.4756	56.0896	58.5162	57.294	71.0525	53.6859	50.9668	3.06116e-05	0.000226745	0.0633655	0.231535	8.05879e-05	4.37148e-06	2.70536e-06	1.31202e-05	0.00131873	5.33059e-06	5	5	57.5494	58.3031	14.2007	7.72579	0.249692	0.127101	1.74951	1.76282	0.106804	0.0549785	0.0442132	0.165563	0.279194	0.83742	0	1	0	0	0	0
sp|Q13617|CUL2_HUMAN	Q13617	sp|Q13617|CUL2_HUMAN	>sp|Q13617|CUL2_HUMAN Cullin-2 OS=Homo sapiens GN=CUL2 PE=1 SV=2	CUL2	CUL2	8453	1	76.7073	90.2132	82.2321	97.6902	95.7501	83.8063	73.4302	109.814	83.4379	85.1889	3.74746e-05	0.00997494	0.00607708	0.000462618	5.52507e-05	5.31257e-05	1.88861e-05	4.90873e-05	3.03088e-05	7.26198e-06	5	5	88.5186	87.1355	8.92066	13.5157	0.102859	0.147684	1.94523	1.93631	0.0445535	0.0637928	-0.0296203	-0.171188	-0.276304	0.839253	0	0	0	0	0	0
sp|Q13618-2|CUL3_HUMAN	Q13618-2	sp|Q13618-2|CUL3_HUMAN	>sp|Q13618-2|CUL3_HUMAN Isoform of Q13618, Isoform 2 of Cullin-3 OS=Homo sapiens GN=CUL3	CUL3	CUL3	8452	6	1226.05	1100.5	1254.3	1174.38	1186.14	1342.66	1189.12	1048.74	1194.16	1191.04	6.52909e-06	2.38989e-06	2.85345e-05	1.99977e-05	1.41718e-06	3.82792e-07	9.31425e-06	2.48013e-06	9.07246e-06	1.50158e-05	5	5	1188.27	1193.14	58.4958	103.96	0.0498505	0.0875598	3.07449	3.07537	0.0216364	0.0379541	0.00292677	0.0302462	0.0423901	0.977695	0	1	0	0	0	0
sp|Q93034|CUL5_HUMAN	Q93034	sp|Q93034|CUL5_HUMAN	>sp|Q93034|CUL5_HUMAN Cullin-5 OS=Homo sapiens GN=CUL5 PE=1 SV=4	CUL5	CUL5	8065	1	174.29	184.228	171.13	149.946	152.454	157.706	145.148	170.824	138.089	132.974	9.17338e-08	9.14113e-09	4.12577e-07	3.523e-08	7.48544e-08	3.31593e-08	1.08188e-09	1.08879e-05	1.57948e-08	4.64824e-09	5	5	166.41	148.948	14.7283	15.3525	0.089263	0.101782	2.21981	2.17123	0.0386895	0.0440894	-0.161376	-1.03931	-1.89496	0.13253	0	0	0	0	0	0
sp|P00167-2|CYB5_HUMAN	P00167-2	sp|P00167-2|CYB5_HUMAN	>sp|P00167-2|CYB5_HUMAN Isoform of P00167, Isoform 2 of Cytochrome b5 OS=Homo sapiens GN=CYB5A	CYB5A	CYB5A	1528	2	407.653	346.776	361.201	330.574	405.422	415.496	399.927	363.103	345.377	376.328	4.89308e-08	2.66379e-08	1.04076e-08	2.21794e-07	1.26175e-08	2.10987e-07	1.01556e-08	5.21177e-08	2.11808e-09	7.2576e-08	5	5	370.325	380.046	34.7963	28.0838	0.0940048	0.07402	2.56705	2.57889	0.040736	0.0321026	0.0393124	0.336823	0.506069	0.69837	0	1	0	0	0	0
sp|Q9UHQ9|NB5R1_HUMAN	Q9UHQ9	sp|Q9UHQ9|NB5R1_HUMAN	>sp|Q9UHQ9|NB5R1_HUMAN NADH-cytochrome b5 reductase 1 OS=Homo sapiens GN=CYB5R1 PE=1 SV=1	CYB5R1	CYB5R1	51706	1	301.138	222.079	238.635	242.834	264.089	251.089	235.068	293.636	262.241	250.056	6.33268e-08	1.80695e-08	1.15808e-10	1.64511e-08	1.5279e-09	1.98609e-08	6.23368e-10	2.2174e-09	7.75869e-10	1.02746e-08	5	5	253.755	258.418	30.4271	21.9305	0.116842	0.0828744	2.40201	2.41111	0.0505717	0.0359303	0.0302315	0.218582	0.339837	0.798538	0	1	0	0	0	0
sp|P00387-2|NB5R3_HUMAN	P00387-2	sp|P00387-2|NB5R3_HUMAN	>sp|P00387-2|NB5R3_HUMAN Isoform of P00387, Isoform 2 of NADH-cytochrome b5 reductase 3 OS=Homo sapiens GN=CYB5R3	CYB5R3	CYB5R3	1727	2	522.633	627.074	717.463	632.024	757.566	597.742	726.734	726.967	733.834	761.618	2.43308e-09	5.59607e-09	2.2395e-09	9.54817e-09	5.98663e-09	1.90315e-08	1.83674e-09	5.14184e-09	8.16278e-09	1.80211e-09	5	5	651.352	709.379	91.0821	64.0319	0.1445	0.0959268	2.81029	2.84935	0.0624318	0.0415651	0.129734	0.722251	1.2486	0.313533	0	1	0	0	0	0
sp|P08574|CY1_HUMAN	P08574	sp|P08574|CY1_HUMAN	>sp|P08574|CY1_HUMAN Cytochrome c1, heme protein, mitochondrial OS=Homo sapiens GN=CYC1 PE=1 SV=3	CYC1	CYC1	1537	2	2673.23	2164.34	2420.6	2242.54	2633.82	3145.35	2746.96	2812.89	3062.92	1976.81	2.23655e-07	1.14532e-07	1.49321e-08	4.76386e-08	1.79132e-08	8.14796e-08	1.7872e-08	4.54812e-08	1.93904e-08	7.45138e-08	5	5	2426.91	2748.99	227.19	462.603	0.0941989	0.187536	3.38352	3.43356	0.0408197	0.0807431	0.166206	0.760047	1.35937	0.273071	0	1	0	0	0	0
tr|C9JFR7|C9JFR7_HUMAN	C9JFR7	tr|C9JFR7|C9JFR7_HUMAN	>tr|C9JFR7|C9JFR7_HUMAN Isoform of P99999, Cytochrome c (Fragment) OS=Homo sapiens GN=CYCS PE=1 SV=1	CYCS	CYCS	54205	2	2688.05	2676.86	2981.78	2461.82	2830.79	3585.35	3264.14	3476.07	3326.62	3805.75	3.50148e-08	1.35277e-07	2.05071e-09	9.21279e-09	4.63101e-08	3.02025e-08	1.06414e-08	1.80061e-08	7.02556e-09	9.88062e-09	5	5	2727.86	3491.58	193.669	216.031	0.0714613	0.0613226	3.43494	3.54237	0.0309957	0.0266071	0.356861	1.70986	5.39353	0.00105132	1	1	0	0	0	0
sp|Q7L576|CYFP1_HUMAN	Q7L576	sp|Q7L576|CYFP1_HUMAN	>sp|Q7L576|CYFP1_HUMAN Cytoplasmic FMR1-interacting protein 1 OS=Homo sapiens GN=CYFIP1 PE=1 SV=1	CYFIP1	CYFIP1	23191	6	1263.13	1376.17	1339.29	1410.37	1387.14	1049.43	1092.23	1156.65	1196.79	1021.12	6.19531e-07	4.69994e-08	7.90929e-08	2.63364e-07	9.28119e-07	7.96126e-06	1.73819e-07	1.95671e-07	7.27937e-07	6.83819e-07	5	5	1355.22	1103.24	57.5199	73.0827	0.0431996	0.0660804	3.13169	3.04191	0.0187526	0.0286671	-0.298231	-1.70875	-4.98824	0.00169777	-1	0	0	0	0	0
tr|E7EVJ5|E7EVJ5_HUMAN	E7EVJ5	tr|E7EVJ5|E7EVJ5_HUMAN	>tr|E7EVJ5|E7EVJ5_HUMAN Isoform of Q96F07, Cytoplasmic FMR1-interacting protein 2 OS=Homo sapiens GN=CYFIP2 PE=1 SV=1	CYFIP2	CYFIP2	26999	14	5000.93	5672.78	5209.05	5117.57	5302.58	4605.68	4727.35	5241.09	4846.09	3771.41	1.84833e-08	9.23447e-08	2.2748e-09	2.40907e-08	3.28239e-08	2.0174e-08	7.03166e-09	1.3915e-08	1.35305e-08	3.4055e-08	5	5	5260.58	4638.32	256.024	540.147	0.0479031	0.122833	3.72063	3.66385	0.0207921	0.053146	-0.188638	-1.1731	-2.26211	0.0786767	0	0	0	0	0	0
sp|Q9NQC7-2|CYLD_HUMAN	Q9NQC7-2	sp|Q9NQC7-2|CYLD_HUMAN	>sp|Q9NQC7-2|CYLD_HUMAN Isoform of Q9NQC7, Isoform 2 of Ubiquitin carboxyl-terminal hydrolase CYLD OS=Homo sapiens GN=CYLD	CYLD	CYLD	1540	2	124.113	151.856	165.521	156.602	134.458	358.131	319.336	315.685	278.89	355.424	0.0147591	0.0237743	0.00044413	0.00141149	0.0112011	3.75198e-08	1.8774e-06	4.75489e-06	1.12565e-05	1.70153e-08	5	5	146.51	325.493	16.8727	32.6613	0.118042	0.102693	2.1635	2.51074	0.0510879	0.0444822	1.15353	1.84211	12.0828	4.56591e-06	1	1	0	0	0	0
sp|Q9Y6A2|CP46A_HUMAN	Q9Y6A2	sp|Q9Y6A2|CP46A_HUMAN	>sp|Q9Y6A2|CP46A_HUMAN Cholesterol 24-hydroxylase OS=Homo sapiens GN=CYP46A1 PE=1 SV=1	CYP46A1	CYP46A1	10858	2	199.703	202.359	210.954	211.245	187.215	230.332	235.464	214.762	258.802	242.127	3.70601e-06	3.24156e-05	4.49291e-06	0.000761269	1.057e-06	6.80741e-06	5.16447e-07	1.8178e-06	4.98429e-08	6.11383e-07	5	5	202.295	236.297	9.86416	16.1285	0.0495126	0.0683641	2.30556	2.37265	0.0214899	0.0296555	0.222851	1.56129	3.59313	0.0112399	0	1	0	0	0	0
sp|Q15438-3|CYH1_HUMAN	Q15438-3	sp|Q15438-3|CYH1_HUMAN	>sp|Q15438-3|CYH1_HUMAN Isoform of Q15438, Isoform 3 of Cytohesin-1 OS=Homo sapiens GN=CYTH1	CYTH1	CYTH1	9267	1	72.9004	77.4109	53.7827	97.7575	50.8602	71.6375	74.5258	109.899	71.3166	110.976	0.000982531	0.000175919	0.00453653	1.23196e-05	0.125257	2.56127e-06	0.000882351	9.34339e-07	3.45131e-06	7.35709e-06	5	5	70.5424	87.671	19.1159	20.8239	0.275429	0.234458	1.83574	1.93337	0.117438	0.100465	0.324324	0.847745	1.61327	0.195595	0	1	0	0	0	0
sp|O43739-2|CYH3_HUMAN	O43739-2	sp|O43739-2|CYH3_HUMAN	>sp|O43739-2|CYH3_HUMAN Isoform of O43739, Isoform 2 of Cytohesin-3 OS=Homo sapiens GN=CYTH3	CYTH3	CYTH3	9265	1	66.798	86.0745	71.1904	88.2085	52.9151	83.2031	71.8754	104.043	72.2209	90.834	8.24069e-05	0.00101385	1.90791e-05	0.000146113	0.000340833	1.96821e-06	6.21899e-08	3.96836e-08	3.60122e-06	2.08989e-08	5	5	73.0373	84.4353	14.5548	13.5451	0.210652	0.158307	1.85623	1.92217	0.0904939	0.0683269	0.219045	0.792533	1.4594	0.239666	0	1	0	0	0	0
tr|H7BZ32|H7BZ32_HUMAN	H7BZ32	tr|H7BZ32|H7BZ32_HUMAN	>tr|H7BZ32|H7BZ32_HUMAN Isoform of Q8N465, D-2-hydroxyglutarate dehydrogenase, mitochondrial (Fragment) OS=Homo sapiens GN=D2HGDH PE=1 SV=1	D2HGDH	D2HGDH	728294	1	37.5781	41.1436	37.9187	41.2625	28.7087	198.513	197.005	194.413	203.72	229.574	0.425566	0.241119	0.0300474	0.324268	0.43127	7.20053e-07	2.89666e-07	3.31439e-08	7.38229e-07	1.55223e-07	5	5	37.3223	204.645	5.1172	14.3435	0.149461	0.0675669	1.56833	2.31019	0.0645519	0.0293105	2.4644	1.88365	24.8639	1.66299e-08	1	1	0	0	0	0
sp|Q9Y4D1-2|DAAM1_HUMAN	Q9Y4D1-2	sp|Q9Y4D1-2|DAAM1_HUMAN	>sp|Q9Y4D1-2|DAAM1_HUMAN Isoform of Q9Y4D1, Isoform 2 of Disheveled-associated activator of morphogenesis 1 OS=Homo sapiens GN=DAAM1	DAAM1	DAAM1	23002	4	566.331	534.434	452.576	502.079	468.239	624.25	575.534	603.042	654.661	635.002	7.46249e-06	1.56744e-05	1.64978e-05	1.28124e-06	8.00539e-06	9.51289e-08	2.31851e-08	2.63059e-06	1.56787e-06	3.67332e-07	5	5	504.732	618.498	46.7324	30.4059	0.0924298	0.0495968	2.70158	2.79091	0.0400564	0.0215264	0.296763	1.59528	4.18626	0.00489242	1	1	0	0	0	0
sp|Q86T65-4|DAAM2_HUMAN	Q86T65-4	sp|Q86T65-4|DAAM2_HUMAN	>sp|Q86T65-4|DAAM2_HUMAN Isoform of Q86T65, Isoform 2 of Disheveled-associated activator of morphogenesis 2 OS=Homo sapiens GN=DAAM2	DAAM2	DAAM2	23500	1	48.5323	67.6451	39.7631	48.4667	50.2941	30.8488	54.9481	48.9631	55.2676	60.8283	9.96064e-06	2.91063e-05	0.00236721	0.00063377	6.57766e-07	0.000598092	1.79189e-05	1.56894e-06	8.44031e-06	5.07407e-05	5	5	50.9403	50.1712	10.2019	11.5886	0.192579	0.273454	1.70054	1.68913	0.0828757	0.116625	-0.037918	-0.119434	-0.203041	0.884828	0	0	0	0	0	0
sp|Q5VWQ8-3|DAB2P_HUMAN	Q5VWQ8-3	sp|Q5VWQ8-3|DAB2P_HUMAN	>sp|Q5VWQ8-3|DAB2P_HUMAN Isoform of Q5VWQ8, Isoform 3 of Disabled homolog 2-interacting protein OS=Homo sapiens GN=DAB2IP	DAB2IP	DAB2IP	153090	1	70.4173	106.024	82.4976	84.8408	92.0411	72.1296	71.0467	76.225	65.2976	80.2652	1.12672e-05	1.08745e-06	1.69127e-05	1.27413e-05	1.2167e-05	0.00339261	7.10785e-08	0.000120967	0.00448637	2.60909e-05	5	5	87.1643	72.9928	13.1066	5.63657	0.151019	0.0778216	1.93642	1.86224	0.0652175	0.0337465	-0.246443	-1.1841	-2.41452	0.0626696	0	0	0	0	0	0
tr|F5GXX5|F5GXX5_HUMAN	F5GXX5	tr|F5GXX5|F5GXX5_HUMAN	>tr|F5GXX5|F5GXX5_HUMAN Isoform of P61803, Dolichyl-diphosphooligosaccharide--protein glycosyltransferase subunit DAD1 OS=Homo sapiens GN=DAD1 PE=1 SV=1	DAD1	DAD1	1603	1	103.698	98.5277	109.773	99.1857	115.557	99.9309	110.67	127.525	123.397	126.072	8.59583e-09	1.28442e-08	3.83914e-09	2.46923e-09	8.27784e-08	3.59825e-06	1.03376e-07	1.45234e-06	1.46273e-08	5.23616e-08	5	5	105.348	117.519	7.26308	11.8751	0.068256	0.104919	2.02181	2.06825	0.0296088	0.0454412	0.154257	1.06354	1.92183	0.127698	0	1	0	0	0	0
sp|Q14118|DAG1_HUMAN	Q14118	sp|Q14118|DAG1_HUMAN	>sp|Q14118|DAG1_HUMAN Dystroglycan OS=Homo sapiens GN=DAG1 PE=1 SV=2	DAG1	DAG1	1605	1	120.191	105.869	109.555	115.965	147.837	122.453	140.526	125.026	163.123	170.723	0.00266038	5.61583e-05	0.000558409	0.000107126	0.000169289	0.000118472	1.37151e-06	3.86095e-07	5.72476e-06	1.60963e-07	5	5	119.883	144.37	16.5825	21.8831	0.131288	0.151812	2.07568	2.15551	0.0567741	0.0655558	0.265192	1.11645	2.2517	0.0799013	0	1	0	0	0	1
sp|Q9Y4D2|DGLA_HUMAN	Q9Y4D2	sp|Q9Y4D2|DGLA_HUMAN	>sp|Q9Y4D2|DGLA_HUMAN Sn1-specific diacylglycerol lipase alpha OS=Homo sapiens GN=DAGLA PE=1 SV=3	DAGLA	DAGLA	747	6	1165.5	1264.1	1176.93	986.317	1030.79	772.116	831.797	979.413	931.971	918.193	2.79004e-08	1.44875e-07	1.84422e-09	5.06322e-08	2.97115e-07	2.96082e-06	1.56649e-06	4.07774e-08	2.55827e-08	7.41078e-08	5	5	1124.73	886.698	113.789	83.3378	0.102415	0.0960769	3.04925	2.9462	0.0443622	0.0416298	-0.342311	-1.52024	-3.90745	0.00718905	0	0	0	0	0	0
sp|P14868|SYDC_HUMAN	P14868	sp|P14868|SYDC_HUMAN	>sp|P14868|SYDC_HUMAN Aspartate--tRNA ligase, cytoplasmic OS=Homo sapiens GN=DARS PE=1 SV=2	DARS	DARS	1615	1	47.1459	74.3964	67.3871	47.7536	64.713	37.335	30.1887	30.5704	29.7932	34.4357	6.28396e-07	6.66115e-06	4.76511e-07	0.0701055	5.66691e-05	0.0615002	0.455151	0.234317	0.00732241	0.0443889	5	5	60.2792	32.4646	12.2357	3.29811	0.211419	0.0992433	1.77271	1.50968	0.0908163	0.0429952	-0.873789	-1.70838	-6.50412	0.000314132	-1	0	0	0	0	0
sp|Q16643-3|DREB_HUMAN	Q16643-3	sp|Q16643-3|DREB_HUMAN	>sp|Q16643-3|DREB_HUMAN Isoform of Q16643, Isoform 3 of Drebrin OS=Homo sapiens GN=DBN1	DBN1	DBN1	1627	4	867.842	1068.12	949.655	845.495	869.622	857.44	735.597	815.438	632.027	678.69	1.2946e-08	4.43741e-09	6.32447e-10	5.45433e-09	2.40404e-08	3.08694e-09	8.54695e-10	3.62679e-09	1.61039e-09	1.10264e-09	5	5	920.147	743.838	91.6896	93.3355	0.096315	0.126503	2.96221	2.86873	0.0417326	0.0547216	-0.310551	-1.38858	-3.21105	0.0196879	0	0	0	0	0	0
sp|Q9UJU6|DBNL_HUMAN	Q9UJU6	sp|Q9UJU6|DBNL_HUMAN	>sp|Q9UJU6|DBNL_HUMAN Drebrin-like protein OS=Homo sapiens GN=DBNL PE=1 SV=1	DBNL	DBNL	28988	1	44.622	60.3818	49.7085	67.7214	38.8887	321.328	358.534	26.1694	298.797	287.1	2.24488e-05	3.89368e-06	1.61279e-07	4.8002e-08	0.000455988	0.0482412	0.0336649	0.149536	0.0127892	0.391379	5	5	52.2645	258.386	11.7117	132.64	0.226922	1.57376	1.70949	2.28254	0.0973164	0.484796	1.90363	1.28175	3.0164	0.0257719	0	1	0	0	0	0
tr|J3QS93|J3QS93_HUMAN	J3QS93	tr|J3QS93|J3QS93_HUMAN	>tr|J3QS93|J3QS93_HUMAN Isoform of P43146, Netrin receptor DCC OS=Homo sapiens GN=DCC PE=1 SV=1	DCC	DCC	1630	1	50.2171	99.35	72.6155	72.152	81.8643	61.3961	77.1117	98.796	63.5983	87.2996	0.000595906	4.07725e-05	0.00553808	1.47016e-05	0.00224368	0.00117861	4.34392e-05	2.18992e-05	1.4631e-06	1.30106e-06	5	5	75.2398	77.6404	17.8027	15.8287	0.252925	0.205463	1.86608	1.88289	0.108145	0.0883108	0.0558525	0.179817	0.306101	0.819289	0	1	0	0	0	0
sp|O15075|DCLK1_HUMAN	O15075	sp|O15075|DCLK1_HUMAN	>sp|O15075|DCLK1_HUMAN Serine/threonine-protein kinase DCLK1 OS=Homo sapiens GN=DCLK1 PE=1 SV=2	DCLK1	DCLK1	9201	14	3210.3	3046.62	2996.02	3224.63	3009.06	4266.28	4183.97	3917.83	3853.44	3830.59	2.93712e-07	2.20097e-07	6.74397e-09	3.6213e-08	1.08224e-07	4.6718e-08	1.69262e-08	2.57796e-08	3.18249e-08	6.15307e-09	5	5	3097.33	4010.42	111.348	200.711	0.0357837	0.0496782	3.49076	3.60276	0.0155357	0.0215617	0.37204	1.81727	7.01014	0.000183256	1	1	0	0	0	0
sp|Q8N568-2|DCLK2_HUMAN	Q8N568-2	sp|Q8N568-2|DCLK2_HUMAN	>sp|Q8N568-2|DCLK2_HUMAN Isoform of Q8N568, Isoform 2 of Serine/threonine-protein kinase DCLK2 OS=Homo sapiens GN=DCLK2	DCLK2	DCLK2	166614	5	993.519	934.203	893.793	1034.55	914.943	1112.48	1090.42	1016.58	1032.1	1119.34	8.38313e-09	3.55806e-08	2.14708e-08	4.8258e-07	1.03507e-07	7.55759e-09	2.18571e-09	1.2402e-07	3.48038e-09	6.38675e-09	5	5	954.202	1074.18	58.2935	47.0592	0.0605682	0.0441228	2.979	3.03074	0.0262803	0.019153	0.171883	1.48523	2.95371	0.0279793	0	1	0	0	0	0
sp|Q14203-6|DCTN1_HUMAN	Q14203-6	sp|Q14203-6|DCTN1_HUMAN	>sp|Q14203-6|DCTN1_HUMAN Isoform of Q14203, Isoform 6 of Dynactin subunit 1 OS=Homo sapiens GN=DCTN1	DCTN1	DCTN1	1639	9	1627.69	1561.01	1611.53	1563.33	1681.95	1886.99	1813.23	1664.25	1819.41	1808.54	2.13828e-07	1.36816e-07	3.21306e-08	2.19067e-07	2.02699e-07	4.34815e-08	1.23198e-08	2.91845e-08	4.38745e-07	5.27607e-08	5	5	1609.1	1798.48	50.1655	81.5609	0.0310216	0.0462655	3.20642	3.25454	0.0134693	0.0200821	0.159863	1.6013	3.12352	0.0221434	0	1	0	0	0	0
sp|Q13561|DCTN2_HUMAN	Q13561	sp|Q13561|DCTN2_HUMAN	>sp|Q13561|DCTN2_HUMAN Dynactin subunit 2 OS=Homo sapiens GN=DCTN2 PE=1 SV=4	DCTN2	DCTN2	10540	3	1484.28	1464.48	1527.51	1465.95	1462.69	1993.8	1807.49	1644.19	1780.26	1772.58	9.77498e-09	4.77025e-08	2.37155e-09	1.38345e-08	1.26158e-07	2.42838e-09	3.36764e-09	6.26417e-09	1.84657e-09	3.24241e-09	5	5	1480.98	1799.66	27.428	125.531	0.0183461	0.0690128	3.17049	3.25436	0.00796693	0.0299363	0.278603	1.719	4.90392	0.00190237	1	1	0	0	0	0
tr|X6RA56|X6RA56_HUMAN	X6RA56	tr|X6RA56|X6RA56_HUMAN	>tr|X6RA56|X6RA56_HUMAN Isoform of O75935, Dynactin subunit 3 OS=Homo sapiens GN=DCTN3 PE=1 SV=1	DCTN3	DCTN3	11258	1	347.795	320.127	345.067	293.013	321.467	407.463	423.363	356.625	366.841	403.479	2.717e-07	1.88369e-07	5.82272e-09	1.31969e-08	7.8858e-08	1.0801e-07	5.19098e-09	8.46741e-09	8.12144e-08	1.13897e-08	5	5	325.494	391.554	22.2512	28.4514	0.0694851	0.0734907	2.51171	2.59186	0.0301407	0.0318736	0.266245	1.55998	3.8459	0.00779887	0	1	0	0	0	0
sp|Q9UJW0|DCTN4_HUMAN	Q9UJW0	sp|Q9UJW0|DCTN4_HUMAN	>sp|Q9UJW0|DCTN4_HUMAN Dynactin subunit 4 OS=Homo sapiens GN=DCTN4 PE=1 SV=1	DCTN4	DCTN4	51164	1	136.543	133.973	133.275	111.136	135.916	151.757	176.429	149.194	124.354	118.114	6.18142e-09	3.95171e-07	4.08176e-08	1.07645e-09	5.40293e-08	1.66046e-07	1.69038e-09	2.95547e-08	4.10266e-09	2.1401e-07	5	5	130.169	143.97	10.724	23.4244	0.0874626	0.163451	2.11323	2.15369	0.0379122	0.0705186	0.134386	0.703838	1.22325	0.323888	0	1	0	0	0	0
sp|O94760|DDAH1_HUMAN	O94760	sp|O94760|DDAH1_HUMAN	>sp|O94760|DDAH1_HUMAN N(G),N(G)-dimethylarginine dimethylaminohydrolase 1 OS=Homo sapiens GN=DDAH1 PE=1 SV=3	DDAH1	DDAH1	23576	3	1321.16	1417.22	1400.52	1534.9	1587.34	1010.15	892.523	914.175	1012.93	918.693	5.0787e-08	2.36882e-08	4.67738e-09	8.14984e-08	2.48791e-08	2.91404e-09	2.76364e-08	7.50373e-08	1.49862e-08	4.89243e-09	5	5	1452.23	949.695	107.433	57.3265	0.0739454	0.0599775	3.16109	2.97696	0.0320703	0.0260245	-0.611666	-1.82532	-9.18169	2.9954e-05	-1	0	0	0	0	0
sp|O95865|DDAH2_HUMAN	O95865	sp|O95865|DDAH2_HUMAN	>sp|O95865|DDAH2_HUMAN N(G),N(G)-dimethylarginine dimethylaminohydrolase 2 OS=Homo sapiens GN=DDAH2 PE=1 SV=1	DDAH2	DDAH2	23564	1	148.41	157.419	157.866	144.992	158.599	372.563	390.777	381.729	498.338	393.93	0.00101879	0.000337056	9.38934e-05	0.000628505	7.92913e-05	5.68228e-06	3.00819e-07	5.73987e-07	4.46453e-07	1.76547e-07	5	5	153.457	407.467	6.29891	51.4783	0.0414728	0.118232	2.18569	2.60757	0.0180037	0.0511693	1.40144	1.87276	17.4581	3.12597e-07	1	1	0	0	0	0
sp|Q16531|DDB1_HUMAN	Q16531	sp|Q16531|DDB1_HUMAN	>sp|Q16531|DDB1_HUMAN DNA damage-binding protein 1 OS=Homo sapiens GN=DDB1 PE=1 SV=1	DDB1	DDB1	1642	4	484.677	577.532	583.633	526.86	529.931	524.09	553.111	533.238	513.41	445.169	1.63523e-06	2.8581e-07	8.37811e-09	5.27767e-06	5.71392e-06	1.83834e-08	3.63093e-08	1.9e-08	1.6165e-08	6.86819e-07	5	5	540.527	513.804	40.7607	41.0471	0.076248	0.0834058	2.73182	2.70963	0.0330661	0.0361599	-0.0737162	-0.639566	-0.988119	0.428599	0	0	0	0	0	0
tr|A0A0C4DGS1|A0A0C4DGS1_HUMAN	A0A0C4DGS1	tr|A0A0C4DGS1|A0A0C4DGS1_HUMAN	>tr|A0A0C4DGS1|A0A0C4DGS1_HUMAN Isoform of P39656, Dolichyl-diphosphooligosaccharide--protein glycosyltransferase 48 kDa subunit OS=Homo sapiens GN=DDOST PE=1 SV=1	DDOST	DDOST	1650	4	721.944	566.575	671.425	697.702	795.302	564.826	589.726	612.656	701.129	669.902	6.21693e-07	1.15238e-07	9.10489e-08	1.13297e-07	1.79685e-08	2.68215e-06	8.00892e-06	1.47126e-07	1.1298e-07	4.10408e-07	5	5	690.59	627.648	83.2845	56.5562	0.124774	0.0896796	2.83659	2.79632	0.0539797	0.0388694	-0.133787	-0.819181	-1.42228	0.251693	0	0	0	0	0	0
sp|Q92499|DDX1_HUMAN	Q92499	sp|Q92499|DDX1_HUMAN	>sp|Q92499|DDX1_HUMAN ATP-dependent RNA helicase DDX1 OS=Homo sapiens GN=DDX1 PE=1 SV=2	DDX1	DDX1	1653	3	328.228	330.622	333.489	348.339	332.681	326.403	353.984	329.016	364.395	355.06	4.667e-05	4.41797e-06	2.55383e-07	4.97318e-06	7.29444e-06	9.1818e-06	6.55477e-06	2.93012e-05	8.93721e-07	9.71872e-06	5	5	334.672	345.772	7.90726	17.0032	0.0233288	0.0495058	2.52452	2.53837	0.0101302	0.0214869	0.0459831	0.793872	0.904181	0.47086	0	1	0	0	0	0
tr|A0A0D9SFB3|A0A0D9SFB3_HUMAN	A0A0D9SFB3	tr|A0A0D9SFB3|A0A0D9SFB3_HUMAN	>tr|A0A0D9SFB3|A0A0D9SFB3_HUMAN Isoform of O00571, ATP-dependent RNA helicase DDX3X OS=Homo sapiens GN=DDX3X PE=1 SV=1	DDX3X	DDX3X	1654	3	306.027	313.025	244.901	357.368	269.679	394.916	411.484	304.839	339.04	504.715	2.35437e-08	4.50562e-06	2.45085e-08	4.4616e-07	5.57933e-08	1.37246e-08	1.78253e-09	1.84273e-08	3.2712e-09	6.4095e-08	5	5	298.2	390.999	43.1166	76.6315	0.145954	0.194841	2.47086	2.58565	0.0630531	0.0838315	0.381315	1.24137	2.72926	0.039443	0	1	0	0	0	0
sp|P17844-2|DDX5_HUMAN	P17844-2	sp|P17844-2|DDX5_HUMAN	>sp|P17844-2|DDX5_HUMAN Isoform of P17844, Isoform 2 of Probable ATP-dependent RNA helicase DDX5 OS=Homo sapiens GN=DDX5	DDX5	DDX5	1655	1	59.2853	36.0436	21.5931	52.1776	71.3055	31.72	47.7728	41.436	77.5311	52.635	0.00611224	0.222308	0.0462359	0.0016984	3.17391e-05	2.05272e-05	6.30655e-05	0.000219351	6.12136e-05	6.97976e-06	5	5	48.081	50.219	19.5461	17.1546	0.50144	0.337562	1.64694	1.68173	0.205682	0.142665	0.115566	0.207223	0.359549	0.787052	0	1	0	0	0	0
sp|P26196|DDX6_HUMAN	P26196	sp|P26196|DDX6_HUMAN	>sp|P26196|DDX6_HUMAN Probable ATP-dependent RNA helicase DDX6 OS=Homo sapiens GN=DDX6 PE=1 SV=2	DDX6	DDX6	1656	4	505.499	455.297	451.794	482.891	458.226	447.001	454.581	411.422	479.87	474.486	3.74604e-06	2.27917e-05	6.62799e-06	6.92244e-07	4.0713e-07	1.12569e-07	9.23551e-07	6.44875e-06	3.02238e-05	4.61417e-08	5	5	470.741	453.472	22.9666	27.1558	0.0481069	0.0611413	2.67238	2.65591	0.0208805	0.0265286	-0.0546987	-0.68261	-0.921974	0.461117	0	0	0	0	0	0
sp|Q16698-2|DECR_HUMAN	Q16698-2	sp|Q16698-2|DECR_HUMAN	>sp|Q16698-2|DECR_HUMAN Isoform of Q16698, Isoform 2 of 2,4-dienoyl-CoA reductase, mitochondrial OS=Homo sapiens GN=DECR1	DECR1	DECR1	1666	1	240.911	271.57	245.071	269.095	382.314	294.953	322.207	321.823	319.023	361.6	1.0574e-06	9.81594e-07	1.70713e-08	1.7086e-07	3.17551e-06	2.66971e-07	0.000105227	2.17616e-07	8.44609e-07	6.5064e-08	5	5	281.792	323.921	57.8579	23.928	0.188401	0.0728372	2.44347	2.50951	0.0811089	0.0315909	0.21938	0.975952	1.85667	0.139966	0	1	0	0	0	0
sp|O43583|DENR_HUMAN	O43583	sp|O43583|DENR_HUMAN	>sp|O43583|DENR_HUMAN Density-regulated protein OS=Homo sapiens GN=DENR PE=1 SV=2	DENR	DENR	8562	2	113.022	134.965	112.488	127.785	117.319	88.5978	75.5636	100.295	72.2087	74.811	4.87877e-05	0.000404651	0.00329694	0.0839049	0.00147519	0.261884	0.0449135	0.0187038	0.00405309	0.130173	5	5	121.116	82.2951	9.88237	11.9034	0.0804739	0.140073	2.08207	1.91191	0.034893	0.0605378	-0.565242	-1.68377	-5.77176	0.000684963	-1	0	0	0	0	0
tr|E5RGY0|E5RGY0_HUMAN	E5RGY0	tr|E5RGY0|E5RGY0_HUMAN	>tr|E5RGY0|E5RGY0_HUMAN Isoform of Q9BUN8, Derlin-1 OS=Homo sapiens GN=DERL1 PE=1 SV=1	DERL1	DERL1	79139	1	87.3053	102.833	93.0865	32.4133	79.7249	96.0664	114.577	110.674	92.9015	116.578	5.66619e-06	3.26023e-05	0.130415	0.06626	0.00016846	2.5391e-06	2.07765e-07	1.72662e-06	1.75777e-06	2.68505e-05	5	5	79.0727	106.16	27.4147	10.9251	0.494526	0.105175	1.86688	2.02407	0.203136	0.0455514	0.522193	0.972535	1.94647	0.122985	0	1	0	0	0	0
tr|B5MBY2|B5MBY2_HUMAN;tr|B5MCD5|B5MCD5_HUMAN	B5MBY2;B5MCD5	tr|B5MBY2|B5MBY2_HUMAN;tr|B5MCD5|B5MCD5_HUMAN	>tr|B5MBY2|B5MBY2_HUMAN Isoform of Q9Y6T7, Diacylglycerol kinase OS=Homo sapiens GN=DGKB PE=1 SV=1;>tr|B5MCD5|B5MCD5_HUMAN Isoform of Q9Y6T7, Diacylglycerol kinase OS=Homo sapiens GN=DGKB PE=1 SV=1	DGKB	DGKB	1607	3	1087.67	1023.24	1230.57	977.679	1046.24	1095.94	1130.83	1087	1114.12	1218.94	3.15303e-06	9.91914e-06	7.41946e-09	2.34409e-05	6.34494e-05	5.66813e-06	2.16381e-06	4.85282e-05	0.00013149	1.30252e-07	5	5	1073.08	1129.37	96.5941	52.8455	0.0874306	0.0457763	3.02928	3.05247	0.0378983	0.01987	0.0770116	0.747012	1.13042	0.363691	0	1	0	0	0	0
sp|P49619-3|DGKG_HUMAN	P49619-3	sp|P49619-3|DGKG_HUMAN	>sp|P49619-3|DGKG_HUMAN Isoform of P49619, Isoform 3 of Diacylglycerol kinase gamma OS=Homo sapiens GN=DGKG	DGKG	DGKG	1608	1	204.734	223.89	229.485	205.459	188.216	195.651	242.043	194.207	173.31	259.197	4.80202e-08	5.01987e-09	4.1407e-09	1.53102e-08	3.01801e-08	1.15065e-08	3.14924e-10	2.31933e-08	9.8028e-10	1.32659e-09	5	5	210.357	212.882	16.5444	36.0799	0.0793224	0.168844	2.32187	2.32322	0.0343953	0.0728132	0.00447297	0.025079	0.0405127	0.977695	0	1	0	0	0	0
sp|Q13574-6|DGKZ_HUMAN	Q13574-6	sp|Q13574-6|DGKZ_HUMAN	>sp|Q13574-6|DGKZ_HUMAN Isoform of Q13574, Isoform 6 of Diacylglycerol kinase zeta OS=Homo sapiens GN=DGKZ	DGKZ	DGKZ	8525	1	104.041	97.0368	100.359	103.956	60.64	114.712	147.816	121.615	116.646	130.395	5.52557e-07	4.52501e-06	3.97236e-08	1.81995e-08	8.71592e-07	9.66817e-08	6.56303e-10	1.22893e-08	1.74221e-05	1.34194e-07	5	5	93.2065	126.237	18.4346	13.501	0.234436	0.103545	1.96106	2.09929	0.100456	0.0448492	0.459186	1.33715	3.14605	0.0214545	0	1	0	0	0	0
sp|Q02127|PYRD_HUMAN	Q02127	sp|Q02127|PYRD_HUMAN	>sp|Q02127|PYRD_HUMAN Dihydroorotate dehydrogenase (quinone), mitochondrial OS=Homo sapiens GN=DHODH PE=1 SV=3	DHODH	DHODH	1723	1	68.008	102.698	70.2875	62.178	92.9308	76.1194	75.6019	70.2903	62.4672	66.321	0.00448557	1.31489e-07	4.972e-06	3.92272e-05	9.91453e-05	0.000318213	1.93072e-05	1.28354e-05	1.53644e-06	2.43865e-06	5	5	79.2204	70.16	17.5721	5.89623	0.218955	0.08507	1.89056	1.84485	0.0939801	0.0368788	-0.151858	-0.639469	-1.12551	0.365746	0	0	0	0	0	0
sp|Q96LJ7|DHRS1_HUMAN	Q96LJ7	sp|Q96LJ7|DHRS1_HUMAN	>sp|Q96LJ7|DHRS1_HUMAN Dehydrogenase/reductase SDR family member 1 OS=Homo sapiens GN=DHRS1 PE=1 SV=1	DHRS1	DHRS1	115817	2	473.904	483.501	469.8	508.716	483.32	278.256	270.387	301.328	294.296	210.737	2.09877e-05	1.84984e-05	2.00177e-05	1.17386e-06	0.000836017	0.0138646	0.202338	0.16237	0.132817	0.115066	5	5	483.848	271.001	15.1249	35.8719	0.0308791	0.14366	2.68454	2.4296	0.0134074	0.0620724	-0.846901	-1.80967	-9.34529	2.70483e-05	-1	0	0	0	0	0
tr|H9KV28|H9KV28_HUMAN	H9KV28	tr|H9KV28|H9KV28_HUMAN	>tr|H9KV28|H9KV28_HUMAN Isoform of O60610, Protein diaphanous homolog 1 OS=Homo sapiens GN=DIAPH1 PE=1 SV=2	DIAPH1	DIAPH1	1729	1	39.7328	69.4439	47.237	63.377	49.2345	45.6377	57.3765	45.7112	57.0938	45.7552	0.000418906	1.8528e-05	1.00012e-05	0.00112334	1.25436e-05	3.82526e-05	4.22304e-07	9.39811e-06	7.589e-08	5.95908e-05	5	5	53.805	50.3149	12.2296	6.31823	0.230195	0.123743	1.72185	1.69902	0.0986847	0.0535371	-0.0758448	-0.301173	-0.509983	0.696216	0	0	0	0	0	0
sp|Q9P265|DIP2B_HUMAN	Q9P265	sp|Q9P265|DIP2B_HUMAN	>sp|Q9P265|DIP2B_HUMAN Disco-interacting protein 2 homolog B OS=Homo sapiens GN=DIP2B PE=1 SV=3	DIP2B	DIP2B	57609	1	102.424	106.268	99.6795	115.436	99.2186	70.7763	74.3852	73.4894	92.4948	66.7201	1.4604e-06	7.53921e-07	4.10564e-06	1.71946e-07	4.47507e-08	0.000115177	5.99465e-07	0.000614812	1.07483e-07	2.91917e-06	5	5	104.605	75.5732	6.67281	9.9182	0.0623269	0.124452	2.01887	1.87559	0.027042	0.0538411	-0.475945	-1.67512	-5.47406	0.000980492	-1	0	0	0	0	0
sp|Q96HU8|DIRA2_HUMAN	Q96HU8	sp|Q96HU8|DIRA2_HUMAN	>sp|Q96HU8|DIRA2_HUMAN GTP-binding protein Di-Ras2 OS=Homo sapiens GN=DIRAS2 PE=1 SV=1	DIRAS2	DIRAS2	54769	5	1704.89	1737.63	1633.86	1717.02	1451.8	1512.07	1408.22	1427.96	1365.84	1440.78	3.07963e-08	1.60659e-07	1.26178e-09	6.1844e-07	6.19037e-09	2.00657e-08	2.98888e-09	6.49835e-08	4.40698e-09	3.5073e-09	5	5	1649.04	1430.98	116.963	53.4841	0.0738735	0.0371459	3.21631	3.15539	0.0320392	0.0161267	-0.202365	-1.52169	-3.3011	0.017304	0	0	0	0	0	0
sp|P10515|ODP2_HUMAN	P10515	sp|P10515|ODP2_HUMAN	>sp|P10515|ODP2_HUMAN Dihydrolipoyllysine-residue acetyltransferase component of pyruvate dehydrogenase complex, mitochondrial OS=Homo sapiens GN=DLAT PE=1 SV=3	DLAT	DLAT	1737	2	3402.33	3364.35	3890.8	3331.1	3327.79	5964.73	6025.1	5746.77	5544.97	6662.28	1.28865e-07	2.72531e-08	1.67537e-10	1.46002e-08	2.75099e-08	1.61946e-07	1.38469e-08	3.77992e-08	2.64005e-08	2.50385e-08	5	5	3463.28	5988.77	240.886	421.612	0.0667713	0.0690421	3.53869	3.7765	0.0289661	0.029949	0.789981	1.85242	11.7935	5.46117e-06	1	1	0	0	0	0
sp|P09622-3|DLDH_HUMAN	P09622-3	sp|P09622-3|DLDH_HUMAN	>sp|P09622-3|DLDH_HUMAN Isoform of P09622, Isoform 3 of Dihydrolipoyl dehydrogenase, mitochondrial OS=Homo sapiens GN=DLD	DLD	DLD	1738	2	552.119	499.569	637.858	509.131	490.451	818.471	788.911	735.41	676.975	823.028	1.63496e-08	7.46526e-07	1.16564e-08	1.13615e-08	4.64544e-09	8.72385e-08	2.46363e-09	1.58913e-09	1.31797e-09	8.30241e-10	5	5	537.826	768.559	60.7084	61.965	0.108278	0.0828116	2.72856	2.88451	0.0468877	0.0359032	0.518068	1.7112	6.05188	0.000497753	1	1	0	0	0	0
sp|Q12959-5|DLG1_HUMAN	Q12959-5	sp|Q12959-5|DLG1_HUMAN	>sp|Q12959-5|DLG1_HUMAN Isoform of Q12959, Isoform 5 of Disks large homolog 1 OS=Homo sapiens GN=DLG1	DLG1	DLG1	1739	4	1023.22	929.659	918.755	858.868	998.413	860.437	714.403	687.977	757.206	707.486	2.94385e-08	1.70565e-08	8.75818e-11	1.31783e-08	8.26266e-09	6.2566e-09	4.69548e-08	3.48174e-07	3.58252e-09	8.90794e-09	5	5	945.783	745.502	65.786	69.0446	0.0699707	0.0892724	2.97495	2.87103	0.0303508	0.0386936	-0.345189	-1.62797	-4.61531	0.00272936	-1	0	0	0	0	0
sp|Q15700|DLG2_HUMAN;sp|Q15700-3|DLG2_HUMAN;tr|B7Z2T4|B7Z2T4_HUMAN	Q15700;Q15700-3;B7Z2T4	sp|Q15700|DLG2_HUMAN;sp|Q15700-3|DLG2_HUMAN;tr|B7Z2T4|B7Z2T4_HUMAN	>sp|Q15700|DLG2_HUMAN Disks large homolog 2 OS=Homo sapiens GN=DLG2 PE=1 SV=3;>sp|Q15700-3|DLG2_HUMAN Isoform of Q15700, Isoform 3 of Disks large homolog 2 OS=Homo sapiens GN=DLG2;>tr|B7Z2T4|B7Z2T4_HUMAN Isoform of Q15700, Disks large homolog 2 OS=Homo sapiens GN=DLG2 PE=1 SV=1	DLG2	DLG2	1740	14	5427.94	4984.3	5397.89	5212.5	5614.75	5760.24	5298.73	5725.59	6314.12	5771.63	2.80502e-08	6.18309e-08	9.41571e-09	2.12893e-07	1.59171e-08	2.38864e-08	1.17436e-08	8.6347e-09	9.87738e-09	2.64359e-07	5	5	5327.48	5774.06	239.044	360.607	0.0452615	0.0621886	3.72617	3.76081	0.0196467	0.0269821	0.115075	1.20352	1.95124	0.122195	0	1	0	0	0	0
sp|Q92796|DLG3_HUMAN;tr|Q5JUW8|Q5JUW8_HUMAN	Q92796;Q5JUW8	sp|Q92796|DLG3_HUMAN;tr|Q5JUW8|Q5JUW8_HUMAN	>sp|Q92796|DLG3_HUMAN Disks large homolog 3 OS=Homo sapiens GN=DLG3 PE=1 SV=2;>tr|Q5JUW8|Q5JUW8_HUMAN Isoform of Q92796, Discs, large homolog 3 (Neuroendocrine-dlg, Drosophila), isoform CRA_b OS=Homo sapiens GN=DLG3 PE=1 SV=1	DLG3	DLG3	1741	14	3650.39	3698.34	3557.92	3164.98	3666.05	2591.4	2428.69	2726.04	2783.46	2470.88	9.09223e-09	7.35724e-09	5.56379e-10	1.92258e-08	1.03812e-08	7.91259e-08	5.97781e-09	5.53647e-08	7.60561e-09	1.3029e-08	5	5	3547.54	2600.09	220.128	154.626	0.0645763	0.0594912	3.54922	3.41437	0.028016	0.0258139	-0.447953	-1.78671	-7.06067	0.000176749	-1	0	0	0	0	0
sp|P78352-3|DLG4_HUMAN	P78352-3	sp|P78352-3|DLG4_HUMAN	>sp|P78352-3|DLG4_HUMAN Isoform of P78352, Isoform 3 of Disks large homolog 4 OS=Homo sapiens GN=DLG4	DLG4	DLG4	1742	23	13649.8	13427.9	14220.8	13302.9	16335	10965.5	10749.5	12424.7	12425.7	10436.9	2.38116e-08	4.25602e-08	2.71407e-09	3.10259e-08	2.00324e-08	1.23997e-08	6.89099e-09	1.30272e-08	8.44302e-09	6.58872e-09	5	5	14187.3	11400.5	1251.14	954.133	0.0845506	0.0831279	4.15062	4.05572	0.0366545	0.0360399	-0.315266	-1.56524	-4.08462	0.0056829	0	0	0	0	0	0
sp|O14490-2|DLGP1_HUMAN;sp|O14490|DLGP1_HUMAN	O14490-2;O14490	sp|O14490-2|DLGP1_HUMAN;sp|O14490|DLGP1_HUMAN	>sp|O14490-2|DLGP1_HUMAN Isoform of O14490, Isoform 2 of Disks large-associated protein 1 OS=Homo sapiens GN=DLGAP1;>sp|O14490|DLGP1_HUMAN Disks large-associated protein 1 OS=Homo sapiens GN=DLGAP1 PE=1 SV=1	DLGAP1	DLGAP1	9229	8	3064.19	2878.1	3141.38	3199.72	3405.02	2622.12	2299.64	2611.71	2714.5	2720.91	5.65619e-09	7.03559e-09	4.38096e-10	4.79871e-09	5.73424e-09	2.05113e-08	9.61082e-10	2.66151e-09	2.9567e-09	1.50708e-09	5	5	3137.68	2593.78	192.427	172.031	0.0614533	0.0689929	3.49595	3.41313	0.0266637	0.0299277	-0.275143	-1.61825	-4.20711	0.00473289	-1	0	0	0	0	0
tr|A0A0G2JLW6|A0A0G2JLW6_HUMAN	A0A0G2JLW6	tr|A0A0G2JLW6|A0A0G2JLW6_HUMAN	>tr|A0A0G2JLW6|A0A0G2JLW6_HUMAN Isoform of Q9P1A6, Disks large-associated protein 2 OS=Homo sapiens GN=DLGAP2 PE=1 SV=2	DLGAP2	DLGAP2	9228	3	515.312	530.287	534.366	502.177	607.336	493.374	461.238	486.694	516.034	447.517	5.63651e-09	8.56186e-08	5.2556e-10	1.84508e-08	7.90854e-09	3.13125e-06	9.85806e-08	4.78412e-07	8.70383e-08	1.92024e-07	5	5	537.895	480.971	40.8602	27.0395	0.0734567	0.0563557	2.72974	2.68157	0.0318589	0.0244556	-0.160025	-1.30552	-2.44389	0.0600191	0	0	0	0	0	0
sp|O95886|DLGP3_HUMAN	O95886	sp|O95886|DLGP3_HUMAN	>sp|O95886|DLGP3_HUMAN Disks large-associated protein 3 OS=Homo sapiens GN=DLGAP3 PE=1 SV=3	DLGAP3	DLGAP3	58512	6	1955.42	1636.38	2028.63	1823.42	1927.1	1764.21	1603.66	1624.54	1792.79	1909.3	4.88706e-08	1.03551e-08	4.81189e-08	1.8036e-08	1.41079e-08	3.61073e-08	2.06824e-07	5.8644e-09	1.29157e-08	9.5457e-08	5	5	1874.19	1738.9	151.97	126.442	0.0837728	0.0726229	3.27162	3.23936	0.0363185	0.0314982	-0.107181	-0.889288	-1.45586	0.240638	0	0	0	0	0	0
sp|Q9Y2H0-1|DLGP4_HUMAN	Q9Y2H0-1	sp|Q9Y2H0-1|DLGP4_HUMAN	>sp|Q9Y2H0-1|DLGP4_HUMAN Isoform of Q9Y2H0, Isoform 2 of Disks large-associated protein 4 OS=Homo sapiens GN=DLGAP4	DLGAP4	DLGAP4	22839	6	898.745	911.467	904.034	1046.52	1041.82	730.184	706.38	834.945	860.615	705.142	5.06662e-07	4.72691e-06	4.51638e-08	1.70212e-06	3.3216e-07	1.15182e-06	2.03345e-07	1.28015e-06	5.02292e-07	2.27697e-06	5	5	960.517	767.453	76.5152	74.5583	0.0788035	0.0959892	2.98142	2.88344	0.034171	0.041592	-0.325474	-1.55808	-4.07763	0.00572261	0	0	0	0	0	0
sp|P36957|ODO2_HUMAN	P36957	sp|P36957|ODO2_HUMAN	>sp|P36957|ODO2_HUMAN Dihydrolipoyllysine-residue succinyltransferase component of 2-oxoglutarate dehydrogenase complex, mitochondrial OS=Homo sapiens GN=DLST PE=1 SV=4	DLST	DLST	1743	3	3796.33	3064.92	3636.52	3406.6	3222.04	4730.09	4745.81	4521.63	4663.94	4896.83	3.58931e-07	2.3076e-07	5.14727e-09	3.89974e-08	7.7122e-08	8.9372e-08	4.60234e-08	1.68983e-08	7.64296e-09	7.87324e-09	5	5	3425.28	4711.66	297.412	136.183	0.0871166	0.028951	3.53338	3.67303	0.0377628	0.0125706	0.463888	1.78492	7.1237	0.000166027	1	1	0	0	0	0
sp|P11532-4|DMD_HUMAN;tr|F8VX32|F8VX32_HUMAN	P11532-4;F8VX32	sp|P11532-4|DMD_HUMAN;tr|F8VX32|F8VX32_HUMAN	>sp|P11532-4|DMD_HUMAN Isoform of P11532, Isoform 3 of Dystrophin OS=Homo sapiens GN=DMD;>tr|F8VX32|F8VX32_HUMAN Isoform of P11532, Dystrophin OS=Homo sapiens GN=DMD PE=1 SV=1	DMD	DMD	1756	1	101.401	148.088	123.495	152.179	167.519	159.893	160.056	160.184	191.197	185.308	1.85628e-06	0.000123842	3.14995e-07	1.38096e-05	1.97694e-08	9.02073e-09	3.74206e-08	6.45233e-07	3.39259e-09	8.56195e-09	5	5	138.536	171.328	26.0893	15.5903	0.201222	0.0897152	2.13493	2.23242	0.086524	0.0388848	0.323864	1.19647	2.53922	0.0523159	0	1	0	0	0	0
sp|Q08495|DEMA_HUMAN	Q08495	sp|Q08495|DEMA_HUMAN	>sp|Q08495|DEMA_HUMAN Dematin OS=Homo sapiens GN=DMTN PE=1 SV=3	DMTN	DMTN	2039	1	94.854	154.608	71.4301	112.812	145.358	115.686	119.93	93.1426	69.0513	87.4047	1.62091e-07	9.15988e-09	4.26847e-06	4.82031e-05	4.9745e-06	4.91169e-05	0.00290381	0.000261769	0.000685119	0.00348203	5	5	115.812	97.0429	34.6268	20.9942	0.325038	0.227712	2.04699	1.97841	0.137633	0.0976469	-0.227815	-0.580364	-1.04129	0.404019	0	0	0	0	0	0
tr|G5E9A7|G5E9A7_HUMAN	G5E9A7	tr|G5E9A7|G5E9A7_HUMAN	>tr|G5E9A7|G5E9A7_HUMAN Isoform of Q09019, Dystrophia myotonica WD repeat-containing protein OS=Homo sapiens GN=DMWD PE=1 SV=1	DMWD	DMWD	1762	1	59.6368	68.5621	67.0064	38.3709	68.3391	63.8732	73.6613	79.8666	72.7675	82.8153	4.01224e-06	0.00056202	2.4591e-05	0.000237903	5.25393e-05	2.23841e-05	7.45352e-08	2.61868e-05	2.11158e-05	1.22689e-06	5	5	60.3831	74.5968	12.837	7.32344	0.251623	0.10071	1.77128	1.87099	0.107606	0.0436276	0.331253	1.06576	2.15897	0.0906208	0	1	0	0	0	0
sp|Q8TDJ6|DMXL2_HUMAN	Q8TDJ6	sp|Q8TDJ6|DMXL2_HUMAN	>sp|Q8TDJ6|DMXL2_HUMAN DmX-like protein 2 OS=Homo sapiens GN=DMXL2 PE=1 SV=2	DMXL2	DMXL2	23312	20	4496.27	4789.84	4824.44	4747.79	4563.87	4823.84	4845.55	5087.92	4762.62	3904.08	2.86549e-08	6.90028e-08	4.83087e-09	3.47441e-08	8.7599e-08	2.91217e-08	6.78086e-09	1.83819e-08	2.12109e-08	4.46252e-08	5	5	4684.44	4684.8	145.489	453.667	0.0312437	0.103021	3.67049	3.66893	0.0135657	0.0446236	-0.00518523	-0.0501832	-0.0719093	0.960175	0	0	0	0	0	0
sp|P31689|DNJA1_HUMAN	P31689	sp|P31689|DNJA1_HUMAN	>sp|P31689|DNJA1_HUMAN DnaJ homolog subfamily A member 1 OS=Homo sapiens GN=DNAJA1 PE=1 SV=2	DNAJA1	DNAJA1	3301	2	517.775	503.688	543.87	643.737	529.881	593.34	632.157	595.411	563.313	654.89	3.07874e-09	8.03697e-09	8.97424e-11	1.0721e-08	3.77075e-09	7.29571e-09	1.38554e-09	4.11384e-09	1.34324e-09	1.52439e-09	5	5	547.79	607.822	55.6503	35.8899	0.0968592	0.0589672	2.73694	2.78317	0.0419672	0.0255869	0.153592	1.13224	2.05431	0.104985	0	1	0	0	0	0
sp|O60884|DNJA2_HUMAN	O60884	sp|O60884|DNJA2_HUMAN	>sp|O60884|DNJA2_HUMAN DnaJ homolog subfamily A member 2 OS=Homo sapiens GN=DNAJA2 PE=1 SV=1	DNAJA2	DNAJA2	10294	4	691.049	812.584	839.431	887.509	866.774	1379.73	1420.42	1154.62	1374.25	1250.56	1.37985e-05	9.25016e-06	7.93075e-05	1.44378e-07	6.95015e-07	3.13066e-07	1.64513e-07	7.19554e-08	5.09643e-08	6.15199e-09	5	5	819.47	1315.92	77.1438	110.322	0.0991642	0.0862044	2.91189	3.11796	0.0429611	0.0373688	0.684568	1.79112	8.22334	6.5822e-05	1	1	0	0	0	0
sp|Q96EY1|DNJA3_HUMAN	Q96EY1	sp|Q96EY1|DNJA3_HUMAN	>sp|Q96EY1|DNJA3_HUMAN DnaJ homolog subfamily A member 3, mitochondrial OS=Homo sapiens GN=DNAJA3 PE=1 SV=2	DNAJA3	DNAJA3	9093	2	155.064	140.732	152.83	119.393	151.794	168.425	188.594	155.416	170.863	206.683	1.02921e-07	1.19337e-06	5.37363e-09	7.55127e-05	5.11995e-06	7.62421e-06	2.83202e-07	1.22349e-05	6.06583e-07	2.0278e-05	5	5	143.963	177.996	14.8097	19.9225	0.109097	0.110658	2.15627	2.24828	0.04724	0.0479118	0.305643	1.39284	3.21915	0.0195771	0	1	0	0	0	0
sp|Q8WW22-3|DNJA4_HUMAN	Q8WW22-3	sp|Q8WW22-3|DNJA4_HUMAN	>sp|Q8WW22-3|DNJA4_HUMAN Isoform of Q8WW22, Isoform 3 of DnaJ homolog subfamily A member 4 OS=Homo sapiens GN=DNAJA4	DNAJA4	DNAJA4	55466	2	103.389	459.214	98.5419	103.072	115.833	244.806	281.077	207.365	212.541	251.784	0.0102295	0.000787939	0.0497071	0.00136959	0.00148616	2.31151e-05	3.57052e-06	7.00188e-05	6.92142e-07	5.53083e-06	5	5	176.01	239.515	158.446	30.2785	0.742303	0.126423	2.14942	2.37657	0.287721	0.0546874	0.754587	0.991806	2.01092	0.111868	0	1	0	0	0	0
tr|C9JRD2|C9JRD2_HUMAN	C9JRD2	tr|C9JRD2|C9JRD2_HUMAN	>tr|C9JRD2|C9JRD2_HUMAN Isoform of P25686, DnaJ homolog subfamily B member 2 (Fragment) OS=Homo sapiens GN=DNAJB2 PE=1 SV=1	DNAJB2	DNAJB2	3300	1	54.3491	49.4499	64.3868	60.2619	58.9926	72.875	80.9392	79.1707	68.9139	61.772	0.0198267	0.000602055	4.37029e-06	0.00216595	1.96875e-06	2.04921e-07	5.62646e-07	8.51261e-06	6.37215e-05	6.57813e-06	5	5	57.488	72.7341	5.74492	7.80279	0.102106	0.109994	1.7578	1.85968	0.0442292	0.0476262	0.338442	1.47657	3.66583	0.0101162	0	1	0	0	0	0
sp|Q9UDY4|DNJB4_HUMAN	Q9UDY4	sp|Q9UDY4|DNJB4_HUMAN	>sp|Q9UDY4|DNJB4_HUMAN DnaJ homolog subfamily B member 4 OS=Homo sapiens GN=DNAJB4 PE=1 SV=1	DNAJB4	DNAJB4	11080	1	49.6466	37.5012	33.6763	40.5427	32.5681	83.4333	85.6185	77.8548	67.2942	65.1913	1.60819e-05	0.317032	1.07499e-05	0.000155139	0.00138172	1.22254e-08	1.24339e-06	4.12768e-08	5.36096e-06	3.07857e-07	5	5	38.787	75.8784	6.84582	9.27031	0.16991	0.124503	1.58359	1.87747	0.0732667	0.0538633	0.976245	1.76685	7.94857	8.22557e-05	1	1	0	0	0	0
tr|C9J2C4|C9J2C4_HUMAN	C9J2C4	tr|C9J2C4|C9J2C4_HUMAN	>tr|C9J2C4|C9J2C4_HUMAN Isoform of O75190, DnaJ homolog subfamily B member 6 (Fragment) OS=Homo sapiens GN=DNAJB6 PE=1 SV=1	DNAJB6	DNAJB6	10049	1	84.2005	66.2271	75.7764	86.7605	73.0814	58.1661	38.1253	47.7485	44.1849	62.2102	8.51686e-07	3.57638e-05	2.48273e-05	0.00153248	4.27149e-06	5.97282e-06	3.82446e-06	0.194106	0.00688761	0.000115795	5	5	77.2092	50.087	8.36366	9.94523	0.109775	0.202368	1.8856	1.6928	0.0475319	0.0870068	-0.640491	-1.59052	-4.82574	0.0020799	-1	0	0	0	0	0
sp|Q9H3Z4|DNJC5_HUMAN	Q9H3Z4	sp|Q9H3Z4|DNJC5_HUMAN	>sp|Q9H3Z4|DNJC5_HUMAN DnaJ homolog subfamily C member 5 OS=Homo sapiens GN=DNAJC5 PE=1 SV=1	DNAJC5	DNAJC5	80331	2	1227.76	1542.5	1618.66	1374.78	1611.89	1150.54	1185.05	1613.17	1314.2	1074.12	8.44765e-09	3.24845e-08	4.80621e-10	4.85687e-08	5.46077e-08	1.07197e-08	4.33595e-09	2.31395e-08	1.79796e-09	1.29814e-08	5	5	1475.12	1267.42	169.634	211.861	0.119775	0.159284	3.16641	3.09841	0.0518325	0.0687435	-0.225911	-1.00499	-1.93047	0.126053	0	0	0	1	0	0
sp|O75061-4|AUXI_HUMAN	O75061-4	sp|O75061-4|AUXI_HUMAN	>sp|O75061-4|AUXI_HUMAN Isoform of O75061, Isoform 4 of Putative tyrosine-protein phosphatase auxilin OS=Homo sapiens GN=DNAJC6	DNAJC6	DNAJC6	9829	8	3192.1	2609.12	2997.01	2893.72	2801.01	3610.18	3317.59	3192.89	3163.21	3168.95	3.34934e-08	6.72065e-08	9.87671e-09	9.65112e-07	1.37181e-08	2.34643e-08	1.23664e-08	8.22767e-09	1.21175e-08	2.32657e-08	5	5	2898.59	3290.56	217.47	189.364	0.075336	0.0560261	3.46121	3.51672	0.0326717	0.0243128	0.1844	1.39077	2.79223	0.0357869	0	1	0	0	1	0
sp|Q9NVH1-3|DJC11_HUMAN	Q9NVH1-3	sp|Q9NVH1-3|DJC11_HUMAN	>sp|Q9NVH1-3|DJC11_HUMAN Isoform of Q9NVH1, Isoform 3 of DnaJ homolog subfamily C member 11 OS=Homo sapiens GN=DNAJC11	DNAJC11	DNAJC11	55735	4	486.096	374.789	444.408	342.266	494.48	416.228	424.78	444.756	494.238	439.154	1.37535e-05	1.40707e-05	2.20877e-05	4.58031e-06	8.13373e-07	3.28552e-06	9.83493e-08	3.78388e-05	5.94773e-06	9.22517e-07	5	5	428.408	443.831	67.5366	30.3662	0.16357	0.0666319	2.62736	2.64643	0.0705689	0.0289058	0.06336	0.368039	0.601265	0.63954	0	1	0	0	0	0
sp|O75165|DJC13_HUMAN	O75165	sp|O75165|DJC13_HUMAN	>sp|O75165|DJC13_HUMAN DnaJ homolog subfamily C member 13 OS=Homo sapiens GN=DNAJC13 PE=1 SV=5	DNAJC13	DNAJC13	23317	1	50.7306	62.448	46.4697	60.8225	14.6154	44.603	47.1039	55.9606	42.0947	50.5519	7.5104e-07	5.76207e-07	3.74435e-07	2.50149e-07	0.490624	3.61287e-08	5.52296e-09	2.5166e-07	9.7563e-08	3.09359e-09	5	5	47.0173	48.0628	19.3175	5.41016	0.662255	0.111178	1.62337	1.67965	0.261897	0.048136	0.186981	0.312732	0.547365	0.67285	0	1	0	0	0	0
tr|A0A0U1RQP1|A0A0U1RQP1_HUMAN	A0A0U1RQP1	tr|A0A0U1RQP1|A0A0U1RQP1_HUMAN	>tr|A0A0U1RQP1|A0A0U1RQP1_HUMAN Isoform of Q05193, Dynamin-1 OS=Homo sapiens GN=DNM1 PE=4 SV=1	DNM1	DNM1	1759	37	54538.9	62576.8	60499	57425.7	53090.1	53353.3	51902	54658.4	49527.2	49631.1	7.86087e-08	6.06206e-08	9.67164e-09	1.57116e-07	2.96792e-07	1.09287e-07	3.48337e-08	8.61752e-08	7.83744e-08	9.38483e-08	5	5	57626.1	51814.4	3965.75	2261.77	0.0688331	0.0436194	4.7598	4.71412	0.0298585	0.0189347	-0.151738	-1.35574	-2.49499	0.0558025	0	0	0	0	1	0
sp|O00429-2|DNM1L_HUMAN	O00429-2	sp|O00429-2|DNM1L_HUMAN	>sp|O00429-2|DNM1L_HUMAN Isoform of O00429, Isoform 4 of Dynamin-1-like protein OS=Homo sapiens GN=DNM1L	DNM1L	DNM1L	10059	18	5887.74	6129.4	6462.03	6513.14	6207.31	7999.43	7500.2	7436.54	7154.75	7018.42	1.23702e-08	1.16114e-08	5.47738e-10	3.59966e-09	1.90611e-08	1.39494e-08	4.13023e-09	4.915e-09	3.80396e-09	4.96376e-09	5	5	6239.92	7421.87	255.584	378.83	0.0411862	0.0505106	3.79489	3.87007	0.0178794	0.0219225	0.249747	1.71321	4.58341	0.00284755	1	1	0	0	0	0
sp|P50570-3|DYN2_HUMAN	P50570-3	sp|P50570-3|DYN2_HUMAN	>sp|P50570-3|DYN2_HUMAN Isoform of P50570, Isoform 3 of Dynamin-2 OS=Homo sapiens GN=DNM2	DNM2	DNM2	1785	3	3896.6	4262.05	4337.32	3859	4045.86	4449.81	4112.83	4035.8	4084.65	3932.21	1.42345e-05	0.00123727	0.0025093	0.000229765	6.03121e-05	3.67103e-07	1.31411e-08	2.13878e-07	3.37616e-08	4.13954e-08	5	5	4080.17	4123.06	213.889	195.18	0.0523031	0.0464203	3.6102	3.61484	0.0226994	0.0201492	0.0154088	0.227579	0.273878	0.840715	0	1	0	0	1	0
sp|Q9UQ16-2|DYN3_HUMAN	Q9UQ16-2	sp|Q9UQ16-2|DYN3_HUMAN	>sp|Q9UQ16-2|DYN3_HUMAN Isoform of Q9UQ16, Isoform 2 of Dynamin-3 OS=Homo sapiens GN=DNM3	DNM3	DNM3	26052	4	1310.06	1181.41	1296.96	1237.54	1383.24	957.809	866.298	901.278	930.076	889.874	8.12934e-07	9.02325e-08	2.87423e-08	1.65394e-08	7.06514e-08	3.71594e-08	1.53466e-08	7.91547e-08	2.69755e-08	1.17811e-07	5	5	1281.84	909.067	76.4158	35.6207	0.0598288	0.0390651	3.10721	2.95833	0.0259601	0.0169593	-0.494583	-1.83476	-8.70143	4.40381e-05	-1	0	0	0	1	0
tr|E7EMB6|E7EMB6_HUMAN	E7EMB6	tr|E7EMB6|E7EMB6_HUMAN	>tr|E7EMB6|E7EMB6_HUMAN Isoform of Q9ULA0, Aspartyl aminopeptidase OS=Homo sapiens GN=DNPEP PE=1 SV=2	DNPEP	DNPEP	23549	1	102.403	94.5783	109.701	87.527	80.2013	137.622	155.079	126.977	150.909	152.385	1.33917e-07	1.3124e-07	2.20406e-07	1.07756e-05	1.87503e-06	8.40599e-08	2.69112e-07	3.81118e-08	1.17286e-06	6.50262e-09	5	5	94.8822	144.595	11.6822	11.9318	0.124444	0.084953	1.97453	2.15893	0.0538378	0.0368283	0.612555	1.7319	6.6158	0.000279537	1	1	0	0	0	0
sp|Q14183|DOC2A_HUMAN	Q14183	sp|Q14183|DOC2A_HUMAN	>sp|Q14183|DOC2A_HUMAN Double C2-like domain-containing protein alpha OS=Homo sapiens GN=DOC2A PE=1 SV=5	DOC2A	DOC2A	8448	1	86.7582	74.3223	67.8451	80.633	85.6344	77.1946	61.9784	59.4565	63.8042	51.7226	1.68952e-06	1.16631e-07	0.00991447	1.73583e-06	2.63504e-06	4.66402e-05	0.0738144	0.01086	0.00012294	0.0104783	5	5	79.0386	62.8312	7.95575	9.25703	0.103382	0.14511	1.89602	1.79451	0.0447792	0.0626923	-0.337212	-1.36873	-3.17234	0.0208275	0	0	0	0	0	0
sp|Q8IZD9|DOCK3_HUMAN	Q8IZD9	sp|Q8IZD9|DOCK3_HUMAN	>sp|Q8IZD9|DOCK3_HUMAN Dedicator of cytokinesis protein 3 OS=Homo sapiens GN=DOCK3 PE=1 SV=1	DOCK3	DOCK3	1795	3	159.019	147.462	181.333	89.9408	192.275	208.271	205.602	198.212	207.615	156.908	0.000129266	0.00085858	0.000800081	0.0516928	4.14341e-05	8.52059e-07	7.93527e-08	5.40148e-06	1.27715e-07	1.74767e-05	5	5	154.006	195.322	39.9487	21.8432	0.308099	0.121373	2.1733	2.28834	0.130784	0.0525191	0.382157	1.02879	2.07587	0.101878	0	1	0	0	0	0
sp|Q8N1I0-2|DOCK4_HUMAN	Q8N1I0-2	sp|Q8N1I0-2|DOCK4_HUMAN	>sp|Q8N1I0-2|DOCK4_HUMAN Isoform of Q8N1I0, Isoform 2 of Dedicator of cytokinesis protein 4 OS=Homo sapiens GN=DOCK4	DOCK4	DOCK4	9732	5	483.38	457.325	496.443	430.459	452.295	390.541	434.552	467.364	460.181	411.66	2.27976e-06	1.82058e-06	4.49872e-07	7.10696e-07	1.46297e-05	6.28511e-07	1.10606e-07	1.27304e-07	4.61177e-08	1.10127e-07	5	5	463.98	432.859	26.1469	32.3271	0.056449	0.0754799	2.66595	2.63537	0.024496	0.0327339	-0.101589	-0.965762	-1.53457	0.217042	0	0	0	0	0	0
sp|Q9BZ29-3|DOCK9_HUMAN	Q9BZ29-3	sp|Q9BZ29-3|DOCK9_HUMAN	>sp|Q9BZ29-3|DOCK9_HUMAN Isoform of Q9BZ29, Isoform 3 of Dedicator of cytokinesis protein 9 OS=Homo sapiens GN=DOCK9	DOCK9	DOCK9	23348	2	122.878	146.747	130.545	121.556	114.044	116.254	121.693	121.938	148.154	128.649	0.00188464	0.000807668	0.00181726	0.000196816	0.00584909	6.88653e-06	7.82432e-06	0.0427444	2.11399e-06	5.63807e-06	5	5	127.154	127.338	12.4183	12.4387	0.0953468	0.094001	2.10273	2.10339	0.0413149	0.0407344	0.00218232	0.0169837	0.0258423	0.986202	0	1	0	0	0	0
sp|O60762|DPM1_HUMAN	O60762	sp|O60762|DPM1_HUMAN	>sp|O60762|DPM1_HUMAN Dolichol-phosphate mannosyltransferase subunit 1 OS=Homo sapiens GN=DPM1 PE=1 SV=1	DPM1	DPM1	8813	1	58.2613	54.2686	61.3053	58.0546	68.1717	33.8225	41.108	45.1989	48.8901	39.9059	9.71103e-05	6.44958e-06	3.57695e-06	2.54723e-05	0.014131	0.000534759	0.008182	0.0452217	0.00149661	1.17082e-05	5	5	60.0123	41.7851	5.19942	5.69051	0.0849477	0.139976	1.77697	1.6177	0.036826	0.0604962	-0.529083	-1.65372	-5.34251	0.00112063	-1	0	0	0	0	0
sp|Q9NY33|DPP3_HUMAN	Q9NY33	sp|Q9NY33|DPP3_HUMAN	>sp|Q9NY33|DPP3_HUMAN Dipeptidyl peptidase 3 OS=Homo sapiens GN=DPP3 PE=1 SV=2	DPP3	DPP3	10072	1	70.7199	61.7357	76.5215	62.9431	62.6385	103.337	98.5845	105.067	109.191	98.0572	0.00019215	0.00287057	0.000220896	0.000190648	9.53157e-05	1.12525e-06	1.81094e-06	1.62436e-05	8.19784e-06	3.03225e-08	5	5	66.9118	102.847	6.47401	4.65104	0.0945277	0.0450911	1.82393	2.01184	0.0409616	0.0195729	0.624222	1.81453	8.81543	3.98142e-05	1	1	0	0	0	0
sp|P42658-2|DPP6_HUMAN	P42658-2	sp|P42658-2|DPP6_HUMAN	>sp|P42658-2|DPP6_HUMAN Isoform of P42658, Isoform DPPX-S of Dipeptidyl aminopeptidase-like protein 6 OS=Homo sapiens GN=DPP6	DPP6	DPP6	1804	8	4975.56	5174.67	4971.37	4328.55	4702.33	3521.53	3652.44	3744.5	3596.55	3449.44	8.5072e-09	9.73851e-08	8.72766e-09	8.39397e-08	7.71625e-08	1.65032e-08	1.45772e-07	8.70022e-08	9.49951e-08	2.61137e-08	5	5	4830.5	3592.89	327.003	114.253	0.0693328	0.0317937	3.68317	3.55527	0.0300748	0.0138043	-0.424884	-1.80326	-7.23657	0.000148071	-1	0	0	0	0	0
sp|Q8N608-4|DPP10_HUMAN	Q8N608-4	sp|Q8N608-4|DPP10_HUMAN	>sp|Q8N608-4|DPP10_HUMAN Isoform of Q8N608, Isoform 4 of Inactive dipeptidyl peptidase 10 OS=Homo sapiens GN=DPP10	DPP10	DPP10	57628	2	455.103	490.848	513.12	463.625	619.519	353.335	336.386	316.561	366.303	300.932	8.19846e-06	7.29181e-07	9.07923e-07	0.000409586	4.21546e-07	0.000274086	7.05084e-06	1.0494e-06	0.000845426	0.00169538	5	5	508.443	334.703	66.1875	26.5433	0.123927	0.0799473	2.7035	2.52356	0.0536159	0.0346654	-0.597751	-1.73102	-6.56777	0.000293642	-1	0	0	0	0	0
sp|Q16555|DPYL2_HUMAN	Q16555	sp|Q16555|DPYL2_HUMAN	>sp|Q16555|DPYL2_HUMAN Dihydropyrimidinase-related protein 2 OS=Homo sapiens GN=DPYSL2 PE=1 SV=1	DPYSL2	DPYSL2	1808	19	60784	63254.1	61768	56740.7	60817.9	64697.2	55790	64490.7	59587.9	53572	1.39286e-07	1.74746e-06	1.70736e-08	3.29482e-08	2.04402e-07	1.32891e-07	7.46934e-08	6.90457e-08	3.59447e-08	3.41743e-08	5	5	60673	59627.6	2416.47	5018.72	0.0404901	0.0847972	4.78271	4.77421	0.0175774	0.036761	-0.0282583	-0.308968	-0.427751	0.743831	0	0	0	0	0	0
sp|Q14195|DPYL3_HUMAN	Q14195	sp|Q14195|DPYL3_HUMAN	>sp|Q14195|DPYL3_HUMAN Dihydropyrimidinase-related protein 3 OS=Homo sapiens GN=DPYSL3 PE=1 SV=1	DPYSL3	DPYSL3	1809	7	2478.89	2455.23	2562.74	2617.69	2601.82	2849.67	2522.45	2362.32	2509.4	2457.54	5.90117e-09	1.61326e-07	1.02772e-09	2.87835e-09	4.54136e-09	1.28804e-08	4.25322e-09	4.12211e-08	2.9822e-09	2.07805e-09	5	5	2543.27	2540.28	72.8721	184.059	0.0287551	0.0703708	3.40525	3.40401	0.0124856	0.0305239	-0.0041354	-0.0565966	-0.0705574	0.96073	0	0	0	0	0	0
sp|O14531|DPYL4_HUMAN	O14531	sp|O14531|DPYL4_HUMAN	>sp|O14531|DPYL4_HUMAN Dihydropyrimidinase-related protein 4 OS=Homo sapiens GN=DPYSL4 PE=1 SV=2	DPYSL4	DPYSL4	10570	6	1256.62	1251.04	1425.93	1510.1	1690.26	1921.16	1575.15	1817.94	1632.63	1531.78	7.73914e-07	3.70986e-07	7.97373e-08	1.72893e-06	1.05195e-06	4.30815e-08	2.18541e-07	9.80311e-07	3.95177e-08	1.43589e-08	5	5	1426.79	1695.73	184.53	166.7	0.128124	0.0971414	3.15151	3.22771	0.0554171	0.042089	0.253143	1.24187	2.59362	0.0482694	0	1	0	0	0	0
sp|Q9BPU6|DPYL5_HUMAN	Q9BPU6	sp|Q9BPU6|DPYL5_HUMAN	>sp|Q9BPU6|DPYL5_HUMAN Dihydropyrimidinase-related protein 5 OS=Homo sapiens GN=DPYSL5 PE=1 SV=1	DPYSL5	DPYSL5	56896	5	651.771	583.123	638.171	634.514	717.79	1060.84	826.988	740.486	777.695	774.37	1.05574e-06	6.42695e-06	5.57644e-08	4.19603e-06	3.79908e-07	1.13709e-08	1.16471e-08	5.24834e-08	2.6855e-08	1.20009e-08	5	5	645.074	836.076	48.2948	129.378	0.0743882	0.144175	2.80865	2.91848	0.0322618	0.0622927	0.364876	1.47591	3.71361	0.00940525	0	1	0	0	0	0
sp|P55039|DRG2_HUMAN	P55039	sp|P55039|DRG2_HUMAN	>sp|P55039|DRG2_HUMAN Developmentally-regulated GTP-binding protein 2 OS=Homo sapiens GN=DRG2 PE=1 SV=1	DRG2	DRG2	1819	1	118.424	135.59	124.842	134.077	116.357	115.293	120.883	119.816	98.3705	98.8366	0.000516563	2.89329e-05	1.17393e-05	4.49006e-06	6.35413e-05	1.78365e-05	8.35021e-06	1.20413e-05	0.000227211	4.88948e-06	5	5	125.858	110.64	8.78667	11.1876	0.0698402	0.103158	2.09904	2.04209	0.0302943	0.0446823	-0.189156	-1.21514	-2.36478	0.0671263	0	0	0	0	0	0
tr|E9PEB9|E9PEB9_HUMAN	E9PEB9	tr|E9PEB9|E9PEB9_HUMAN	>tr|E9PEB9|E9PEB9_HUMAN Isoform of Q03001, Dystonin OS=Homo sapiens GN=DST PE=1 SV=3	DST	DST	667	1	90.3668	81.4675	46.4693	90.2898	85.2745	48.3971	77.2765	63.3786	87.9571	97.5466	9.82813e-08	2.84968e-05	0.000297461	1.48957e-06	7.32538e-07	4.08697e-08	8.98502e-08	1.3717e-05	6.4863e-08	2.4475e-06	5	5	78.7736	74.9112	18.4399	19.5202	0.288343	0.284272	1.88412	1.86166	0.122734	0.121067	-0.0746267	-0.194434	-0.334134	0.801928	0	0	0	0	0	0
sp|P60981|DEST_HUMAN	P60981	sp|P60981|DEST_HUMAN	>sp|P60981|DEST_HUMAN Destrin OS=Homo sapiens GN=DSTN PE=1 SV=3	DSTN	DSTN	11034	1	1176.17	1152.67	1193.89	1207.15	1092.27	866.668	734.169	772.858	781.273	807.545	5.87559e-09	8.97388e-08	2.64477e-09	6.27379e-08	4.88597e-09	1.27103e-08	9.88961e-09	1.65265e-09	3.8978e-08	3.11577e-08	5	5	1164.43	792.503	45.2105	49.0958	0.0394385	0.0613449	3.06585	2.89834	0.0171213	0.0266167	-0.556432	-1.8454	-9.69261	2.12275e-05	-1	0	0	0	0	0
sp|Q8TEA8|DTD1_HUMAN	Q8TEA8	sp|Q8TEA8|DTD1_HUMAN	>sp|Q8TEA8|DTD1_HUMAN D-tyrosyl-tRNA(Tyr) deacylase 1 OS=Homo sapiens GN=DTD1 PE=1 SV=2	DTD1	DTD1	92675	2	277.602	286.292	499.554	524.323	287.96	426.034	422.068	382.463	396.918	351.975	0.0203397	9.00091e-05	0.0569143	0.00491484	0.000500657	3.78277e-06	9.33966e-06	5.24628e-05	1.3262e-05	1.36547e-06	5	5	375.146	395.892	125.242	30.4296	0.332142	0.078346	2.55555	2.59653	0.140491	0.0339732	0.136121	0.41495	0.721844	0.569408	0	1	0	0	0	0
sp|Q9Y4J8-13|DTNA_HUMAN;sp|Q9Y4J8-10|DTNA_HUMAN	Q9Y4J8-13;Q9Y4J8-10	sp|Q9Y4J8-13|DTNA_HUMAN;sp|Q9Y4J8-10|DTNA_HUMAN	>sp|Q9Y4J8-13|DTNA_HUMAN Isoform of Q9Y4J8, Isoform 13 of Dystrobrevin alpha OS=Homo sapiens GN=DTNA;>sp|Q9Y4J8-10|DTNA_HUMAN Isoform of Q9Y4J8, Isoform 10 of Dystrobrevin alpha OS=Homo sapiens GN=DTNA	DTNA	DTNA	1837	2	161.093	166.758	165.457	154.8	173.887	159.187	155.525	149.41	169.555	186.166	0.000117481	0.00017791	8.97378e-05	0.0025057	9.08276e-05	2.46462e-06	9.9714e-09	2.63584e-05	4.98556e-07	2.66431e-05	5	5	164.399	163.968	7.06717	14.4052	0.0430952	0.0860564	2.21558	2.21346	0.0187073	0.0373049	-0.0070369	-0.0760775	-0.104945	0.941659	0	0	0	0	0	0
sp|Q8N9I9|DTX3_HUMAN	Q8N9I9	sp|Q8N9I9|DTX3_HUMAN	>sp|Q8N9I9|DTX3_HUMAN Probable E3 ubiquitin-protein ligase DTX3 OS=Homo sapiens GN=DTX3 PE=1 SV=2	DTX3	DTX3	196403	1	182.899	178.108	197.755	224.21	146.15	227.298	187.719	165.444	143.131	162.043	0.000201872	2.07468e-05	4.19357e-06	9.40075e-07	1.97975e-07	2.06332e-06	7.72981e-07	3.02253e-05	7.61164e-06	1.10815e-05	5	5	185.825	177.127	28.5394	32.2065	0.157811	0.176547	2.2649	2.24282	0.0681154	0.0760857	-0.0733207	-0.319568	-0.537791	0.678839	0	0	0	0	0	0
sp|P51452-2|DUS3_HUMAN	P51452-2	sp|P51452-2|DUS3_HUMAN	>sp|P51452-2|DUS3_HUMAN Isoform of P51452, Isoform 2 of Dual specificity protein phosphatase 3 OS=Homo sapiens GN=DUSP3	DUSP3	DUSP3	1845	3	343.653	335.896	359.09	366.729	292.955	373.266	382.991	390.868	348.773	315.602	8.11044e-06	1.55195e-05	4.19287e-07	7.2282e-07	1.40613e-06	2.1526e-06	9.69034e-07	5.81081e-08	3.35814e-06	3.97666e-07	5	5	339.665	362.3	28.8172	30.5294	0.0883071	0.0870257	2.52973	2.55778	0.0382768	0.0377235	0.0931773	0.723701	1.16874	0.346101	0	1	0	0	0	0
sp|Q14204|DYHC1_HUMAN	Q14204	sp|Q14204|DYHC1_HUMAN	>sp|Q14204|DYHC1_HUMAN Cytoplasmic dynein 1 heavy chain 1 OS=Homo sapiens GN=DYNC1H1 PE=1 SV=5	DYNC1H1	DYNC1H1	1778	85	18807.4	18663	18839.4	20543.4	20490	17937.8	18483.8	16867.9	20302.6	17958.4	2.6971e-08	1.27067e-07	7.20864e-09	9.34147e-08	4.90184e-08	7.57351e-08	3.63771e-08	7.96655e-08	1.58249e-08	3.13865e-08	5	5	19468.6	18310.1	959.214	1259.23	0.0489076	0.0676633	4.28892	4.26189	0.0212276	0.0293522	-0.0897921	-0.964049	-1.45672	0.240491	0	0	0	0	0	0
sp|O14576-2|DC1I1_HUMAN	O14576-2	sp|O14576-2|DC1I1_HUMAN	>sp|O14576-2|DC1I1_HUMAN Isoform of O14576, Isoform 2 of Cytoplasmic dynein 1 intermediate chain 1 OS=Homo sapiens GN=DYNC1I1	DYNC1I1	DYNC1I1	1780	2	980.022	1066.88	1088.03	954.641	975.144	937.531	893.029	967.175	968.191	843.004	1.06551e-07	2.29064e-07	2.93313e-07	7.22128e-07	3.37832e-06	1.66662e-07	4.6525e-08	2.56701e-07	9.85908e-07	4.83053e-08	5	5	1012.94	921.786	60.1244	53.6074	0.0588897	0.0591838	3.00498	2.96403	0.0255533	0.0256807	-0.136037	-1.26429	-2.20683	0.0848957	0	0	0	0	0	0
sp|Q9Y6G9|DC1L1_HUMAN	Q9Y6G9	sp|Q9Y6G9|DC1L1_HUMAN	>sp|Q9Y6G9|DC1L1_HUMAN Cytoplasmic dynein 1 light intermediate chain 1 OS=Homo sapiens GN=DYNC1LI1 PE=1 SV=3	DYNC1LI1	DYNC1LI1	51143	6	1107.58	1173.87	1254.66	1277.2	1170.54	1001.86	958.301	959.267	951.207	936.653	7.76602e-08	2.25894e-07	6.3588e-10	1.57036e-07	3.21963e-08	1.16128e-07	6.03254e-09	1.2418e-06	1.5412e-08	4.16859e-07	5	5	1196.77	961.457	68.8964	24.3262	0.0577445	0.0250427	3.07743	2.98282	0.0250573	0.0108742	-0.314297	-1.78224	-5.85531	0.000627195	-1	0	0	0	0	0
sp|O43237|DC1L2_HUMAN	O43237	sp|O43237|DC1L2_HUMAN	>sp|O43237|DC1L2_HUMAN Cytoplasmic dynein 1 light intermediate chain 2 OS=Homo sapiens GN=DYNC1LI2 PE=1 SV=1	DYNC1LI2	DYNC1LI2	1783	4	550.282	496.796	573.749	554.854	564.386	710.926	628.437	633.711	705.192	597.328	1.3127e-06	2.41794e-07	3.96746e-05	5.54937e-07	9.71343e-06	7.99882e-08	3.96469e-08	1.34687e-06	1.78658e-08	1.2775e-08	5	5	548.013	655.119	30.023	50.3284	0.0565327	0.0766662	2.73825	2.8153	0.0245323	0.033247	0.255959	1.57022	3.84121	0.00783867	0	1	0	0	0	0
sp|Q96FJ2|DYL2_HUMAN	Q96FJ2	sp|Q96FJ2|DYL2_HUMAN	>sp|Q96FJ2|DYL2_HUMAN Dynein light chain 2, cytoplasmic OS=Homo sapiens GN=DYNLL2 PE=1 SV=1	DYNLL2	DYNLL2	140735	1	287.333	193.182	171.333	173.698	156.373	261.502	189.286	137.472	185.76	269.844	3.24755e-09	3.19485e-08	8.80454e-11	8.72323e-08	2.84807e-07	1.04233e-06	4.10676e-09	2.2674e-09	4.629e-10	5.2722e-10	5	5	196.384	208.773	52.5	55.9088	0.242013	0.283787	2.28243	2.30657	0.103613	0.120868	0.0802062	0.225873	0.387766	0.767133	0	1	0	0	0	0
sp|Q9NP97|DLRB1_HUMAN	Q9NP97	sp|Q9NP97|DLRB1_HUMAN	>sp|Q9NP97|DLRB1_HUMAN Dynein light chain roadblock-type 1 OS=Homo sapiens GN=DYNLRB1 PE=1 SV=3	DYNLRB1	DYNLRB1	83658	1	159.79	188.554	180.79	193.1	173.328	111.817	114.417	131.633	111.566	110.882	8.04045e-08	4.76558e-06	1.03606e-06	3.68531e-07	2.94063e-07	5.95828e-08	9.84496e-08	1.56012e-06	8.47494e-05	1.03369e-06	5	5	179.112	116.063	13.1761	8.8066	0.075046	0.0726615	2.25216	2.06375	0.0325463	0.0315149	-0.625889	-1.81526	-8.85113	3.90017e-05	-1	0	0	0	0	0
sp|P30084|ECHM_HUMAN	P30084	sp|P30084|ECHM_HUMAN	>sp|P30084|ECHM_HUMAN Enoyl-CoA hydratase, mitochondrial OS=Homo sapiens GN=ECHS1 PE=1 SV=4	ECHS1	ECHS1	1892	1	541.876	366.159	376.803	427.742	341.812	431.138	268.309	376.586	335.206	559.955	1.8941e-06	5.96347e-07	1.98501e-08	4.47129e-07	5.93337e-08	9.66314e-08	1.05445e-08	8.66137e-08	5.87574e-07	2.32085e-08	5	5	410.878	394.239	79.6491	110.089	0.183095	0.280514	2.60773	2.58252	0.0788627	0.119526	-0.08376	-0.261596	-0.448138	0.732758	0	0	0	0	0	0
tr|F1LLU7|F1LLU7_HUMAN	F1LLU7	tr|F1LLU7|F1LLU7_HUMAN	>tr|F1LLU7|F1LLU7_HUMAN Isoform of O75521, Enoyl-CoA delta isomerase 2, mitochondrial OS=Homo sapiens GN=ECI2 PE=1 SV=1	ECI2	ECI2	10455	1	46.183	53.206	58.8329	63.7778	61.948	70.1153	68.9606	73.4393	70.5778	73.9997	2.42317e-06	7.47477e-05	0.000630412	0.00279671	3.5929e-06	4.27683e-06	5.99912e-07	5.19719e-07	4.07181e-07	2.84899e-07	5	5	56.7895	71.4185	7.15824	2.19048	0.131948	0.0306024	1.75135	1.85365	0.0570572	0.0132874	0.339821	1.53657	3.99423	0.00639026	0	1	0	0	0	0
sp|Q5VYK3|ECM29_HUMAN	Q5VYK3	sp|Q5VYK3|ECM29_HUMAN	>sp|Q5VYK3|ECM29_HUMAN Proteasome-associated protein ECM29 homolog OS=Homo sapiens GN=ECM29 PE=1 SV=2	ECM29	ECM29	23392	1	184.415	270.143	229.306	226.756	269.09	267.577	166.477	251.829	232.124	204.307	0.000251825	5.57295e-06	2.0639e-08	1.59798e-05	1.86487e-06	3.24496e-05	0.00118318	7.30301e-06	0.00177061	9.21524e-07	5	5	235.942	224.463	35.5386	40.1093	0.157693	0.190407	2.36865	2.34518	0.0680649	0.0819578	-0.0779662	-0.325553	-0.550177	0.671543	0	0	0	0	0	0
sp|O60869-2|EDF1_HUMAN	O60869-2	sp|O60869-2|EDF1_HUMAN	>sp|O60869-2|EDF1_HUMAN Isoform of O60869, Isoform 2 of Endothelial differentiation-related factor 1 OS=Homo sapiens GN=EDF1	EDF1	EDF1	8721	1	64.8331	67.6715	75.329	60.1851	81.6723	60.6554	88.1258	73.5827	77.385	83.7374	0.000200485	0.000368641	0.000934653	1.95389e-05	5.29973e-06	7.08355e-08	2.35599e-06	1.85058e-05	9.66232e-08	6.44027e-06	5	5	69.9382	76.6973	8.55971	10.5793	0.121672	0.145274	1.84215	1.88126	0.0526476	0.0627626	0.129951	0.670129	1.15968	0.350225	0	1	0	0	0	0
sp|Q15075|EEA1_HUMAN	Q15075	sp|Q15075|EEA1_HUMAN	>sp|Q15075|EEA1_HUMAN Early endosome antigen 1 OS=Homo sapiens GN=EEA1 PE=1 SV=2	EEA1	EEA1	8411	4	513.965	430.277	477.902	466.214	452.59	188.445	206.427	245.384	372.088	225.576	5.30265e-07	1.23398e-06	8.36289e-06	2.16893e-06	1.29138e-06	0.00458434	0.0024696	0.000176505	5.27977e-05	0.000217574	5	5	468.189	247.584	31.1221	72.7698	0.0660355	0.268172	2.66966	2.38075	0.0286477	0.11445	-0.959754	-1.68576	-6.16316	0.000447289	-1	0	0	0	0	0
sp|Q5VTE0|EF1A3_HUMAN	Q5VTE0	sp|Q5VTE0|EF1A3_HUMAN	>sp|Q5VTE0|EF1A3_HUMAN Putative elongation factor 1-alpha-like 3 OS=Homo sapiens GN=EEF1A1P5 PE=5 SV=1	EEF1A1P5	EEF1A1P5	158078	3	2583.38	1940.28	2280.08	2059.93	2370.92	1270.03	1592.46	1818.92	1677.51	1211.36	1.74292e-08	7.78918e-08	1.96351e-09	3.0988e-08	1.36782e-08	7.2521e-09	7.92904e-09	9.7153e-09	9.37043e-09	2.11047e-08	5	5	2246.92	1514.05	254.303	263.144	0.113855	0.179304	3.34935	3.17473	0.0492876	0.0772555	-0.580102	-1.58081	-4.6909	0.00249064	-1	0	0	0	0	0
sp|Q05639|EF1A2_HUMAN	Q05639	sp|Q05639|EF1A2_HUMAN	>sp|Q05639|EF1A2_HUMAN Elongation factor 1-alpha 2 OS=Homo sapiens GN=EEF1A2 PE=1 SV=1	EEF1A2	EEF1A2	1917	4	1845.4	1308.91	1225.88	1455.47	1481.06	844.742	1046.79	1163.84	1015.27	825.295	1.5516e-06	3.49072e-06	1.3383e-08	1.45508e-07	5.21113e-07	9.18194e-06	1.27631e-06	8.07199e-06	7.64952e-06	0.000132472	5	5	1463.35	979.187	238.004	142.941	0.156899	0.147672	3.16101	2.98713	0.0677267	0.0637877	-0.57759	-1.57129	-4.60795	0.00275695	-1	0	0	0	0	0
sp|P24534|EF1B_HUMAN	P24534	sp|P24534|EF1B_HUMAN	>sp|P24534|EF1B_HUMAN Elongation factor 1-beta OS=Homo sapiens GN=EEF1B2 PE=1 SV=3	EEF1B2	EEF1B2	1933	1	119.804	165.096	158.374	144.415	130.901	162.697	137.906	174.951	143.502	151.964	2.64935e-08	4.31378e-09	1.15081e-10	2.65165e-09	4.68453e-09	4.9319e-09	3.51704e-09	1.10155e-09	3.13007e-09	2.27633e-09	5	5	143.718	154.204	18.7648	14.8976	0.133147	0.095883	2.15449	2.1865	0.057571	0.0415462	0.106326	0.636996	1.07147	0.39025	0	1	0	0	0	0
sp|P26641|EF1G_HUMAN	P26641	sp|P26641|EF1G_HUMAN	>sp|P26641|EF1G_HUMAN Elongation factor 1-gamma OS=Homo sapiens GN=EEF1G PE=1 SV=3	EEF1G	EEF1G	1937	2	309.414	271.114	285.083	263.193	286.791	241.734	252.005	274.442	244.625	260.988	3.43134e-07	1.36251e-07	3.45251e-07	1.36793e-06	7.80728e-09	5.81355e-08	4.29163e-08	3.52295e-08	3.37447e-08	1.54962e-08	5	5	283.119	254.759	17.6773	13.2869	0.0618919	0.051601	2.4513	2.40566	0.0268536	0.0223952	-0.151603	-1.36248	-2.50788	0.0546508	0	0	0	0	0	0
sp|P13639|EF2_HUMAN	P13639	sp|P13639|EF2_HUMAN	>sp|P13639|EF2_HUMAN Elongation factor 2 OS=Homo sapiens GN=EEF2 PE=1 SV=4	EEF2	EEF2	1938	9	2535.3	2503.26	2564.5	2642.36	2464.8	2174.24	2140.86	2099.38	2207.24	2095.66	1.49732e-08	1.50616e-07	6.03115e-09	2.67855e-08	1.17349e-08	4.61342e-08	6.20786e-08	1.16229e-07	1.07005e-08	4.5284e-08	5	5	2542.04	2143.48	67.2405	48.0884	0.0263237	0.02239	3.40506	3.33103	0.0114303	0.00972262	-0.245925	-1.83792	-5.44992	0.000997414	-1	0	0	0	0	0
sp|Q96C19|EFHD2_HUMAN	Q96C19	sp|Q96C19|EFHD2_HUMAN	>sp|Q96C19|EFHD2_HUMAN EF-hand domain-containing protein D2 OS=Homo sapiens GN=EFHD2 PE=1 SV=1	EFHD2	EFHD2	79180	1	562.387	536.24	591.944	648.098	586.491	458.967	444.585	402.866	449.693	416.487	1.32761e-07	2.11311e-08	1.10063e-08	2.16798e-08	1.05875e-07	5.35098e-08	1.18471e-08	3.16279e-08	1.95497e-09	2.54613e-08	5	5	585.032	434.52	41.5953	23.7506	0.0703491	0.0552894	2.76632	2.63748	0.0305145	0.0239936	-0.427973	-1.77296	-6.67143	0.00026711	-1	0	0	0	0	0
sp|Q14156|EFR3A_HUMAN	Q14156	sp|Q14156|EFR3A_HUMAN	>sp|Q14156|EFR3A_HUMAN Protein EFR3 homolog A OS=Homo sapiens GN=EFR3A PE=1 SV=2	EFR3A	EFR3A	23167	4	501.719	506.748	491.128	522.981	549.844	491.048	445.595	495.164	520.315	502.041	8.09232e-07	4.95537e-07	2.02307e-06	1.21795e-06	6.24008e-07	9.59973e-06	5.43711e-07	3.47357e-06	1.89462e-05	7.40085e-06	5	5	514.484	490.833	22.8629	27.659	0.0439045	0.0577772	2.71103	2.69036	0.0190583	0.0250714	-0.0686668	-0.8739	-1.19902	0.333504	0	0	0	0	0	0
sp|Q9Y2G0|EFR3B_HUMAN	Q9Y2G0	sp|Q9Y2G0|EFR3B_HUMAN	>sp|Q9Y2G0|EFR3B_HUMAN Protein EFR3 homolog B OS=Homo sapiens GN=EFR3B PE=1 SV=2	EFR3B	EFR3B	22979	6	814.794	733.29	732.961	784.911	783.406	586.332	671.112	646.693	742.481	629.211	7.69674e-06	4.29275e-07	9.10682e-07	1.64164e-06	1.63551e-05	0.000100779	2.91201e-06	3.27661e-05	6.57554e-07	2.0389e-06	5	5	769.872	655.166	35.805	57.7966	0.0465933	0.0872122	2.88604	2.81502	0.0202242	0.0378041	-0.235919	-1.50797	-3.45868	0.0137629	0	0	0	0	0	0
sp|Q9H4M9|EHD1_HUMAN	Q9H4M9	sp|Q9H4M9|EHD1_HUMAN	>sp|Q9H4M9|EHD1_HUMAN EH domain-containing protein 1 OS=Homo sapiens GN=EHD1 PE=1 SV=2	EHD1	EHD1	10938	9	1306.81	1335.47	1338.47	1316.11	1201	1663.78	1691.17	1695.84	1649.77	1684.31	2.93966e-07	3.78953e-08	4.79721e-08	1.91278e-07	5.5195e-08	6.09944e-07	2.64455e-08	1.14821e-08	3.83103e-07	1.84989e-06	5	5	1299.57	1676.97	56.6688	19.5263	0.0448078	0.0116733	3.11346	3.2245	0.01945	0.00506947	0.368881	1.84951	7.6481	0.000103448	1	1	0	0	0	0
sp|Q9NZN3|EHD3_HUMAN	Q9NZN3	sp|Q9NZN3|EHD3_HUMAN	>sp|Q9NZN3|EHD3_HUMAN EH domain-containing protein 3 OS=Homo sapiens GN=EHD3 PE=1 SV=2	EHD3	EHD3	30845	8	1448.26	1492.58	1564.67	1631.12	1429.14	1441.21	1364.87	1406.38	1354.71	1285.08	1.34136e-07	3.37536e-07	1.05559e-07	1.08294e-07	7.37211e-07	3.94145e-08	9.72033e-09	8.48552e-08	6.70163e-08	5.28463e-08	5	5	1513.15	1370.45	84.0576	58.8744	0.0550892	0.0432879	3.17935	3.13654	0.0239068	0.0187909	-0.142225	-1.41144	-2.52575	0.0533674	0	0	0	0	0	0
tr|A0A087WUA5|A0A087WUA5_HUMAN	A0A087WUA5	tr|A0A087WUA5|A0A087WUA5_HUMAN	>tr|A0A087WUA5|A0A087WUA5_HUMAN Isoform of Q9H223, EH domain-containing protein 4 OS=Homo sapiens GN=EHD4 PE=1 SV=1	EHD4	EHD4	30844	1	60.9993	65.1008	79.6977	85.8521	76.6824	68.0719	69.7618	69.5063	71.2317	61.8964	8.94604e-05	2.83007e-06	1.05237e-06	0.00171275	2.16186e-07	3.1414e-05	1.06693e-07	0.00164136	1.48277e-05	4.8486e-06	5	5	73.6664	68.0936	10.3415	3.64115	0.14373	0.0551227	1.86376	1.83259	0.0621022	0.0239213	-0.103548	-0.658858	-1.10038	0.376728	0	0	0	0	0	0
sp|P60842|IF4A1_HUMAN	P60842	sp|P60842|IF4A1_HUMAN	>sp|P60842|IF4A1_HUMAN Eukaryotic initiation factor 4A-I OS=Homo sapiens GN=EIF4A1 PE=1 SV=1	EIF4A1	EIF4A1	1973	1	60.4913	96.7654	75.896	77.6376	68.1711	28.7146	14.6894	59.5683	35.6885	17.9688	5.58101e-05	8.17319e-05	1.0623e-08	1.28959e-05	2.56098e-08	0.00839025	0.515388	0.000214962	8.15969e-05	0.33312	5	5	75.7923	31.3259	13.56	17.8793	0.175672	0.603247	1.87426	1.44143	0.0757145	0.241943	-1.43782	-1.52454	-4.41782	0.00354823	-1	0	0	0	0	0
tr|E7EQG2|E7EQG2_HUMAN	E7EQG2	tr|E7EQG2|E7EQG2_HUMAN	>tr|E7EQG2|E7EQG2_HUMAN Isoform of Q14240, Eukaryotic initiation factor 4A-II OS=Homo sapiens GN=EIF4A2 PE=1 SV=1	EIF4A2	EIF4A2	1974	3	374.289	343.637	403.324	392.638	389.299	474.056	510.187	479.5	468.683	423.93	1.29083e-07	4.18039e-07	2.49656e-08	1.81817e-07	1.33069e-05	3.5421e-07	4.69689e-08	8.69906e-08	2.79674e-07	4.19725e-08	5	5	380.638	471.271	23.1464	30.9747	0.0624101	0.0668797	2.57985	2.6725	0.027078	0.0290131	0.307799	1.66826	4.73494	0.0023571	1	1	0	0	0	0
tr|F8VX11|F8VX11_HUMAN	F8VX11	tr|F8VX11|F8VX11_HUMAN	>tr|F8VX11|F8VX11_HUMAN Isoform of P23588, Eukaryotic translation initiation factor 4B (Fragment) OS=Homo sapiens GN=EIF4B PE=1 SV=1	EIF4B	EIF4B	1975	1	165.251	150.743	164.97	166.358	177.453	171.678	173.591	165.007	150.139	141.716	4.29495e-08	0.000696427	6.89709e-06	9.02942e-07	5.03005e-06	4.06337e-07	1.20319e-08	2.3097e-07	1.87876e-08	0.000206312	5	5	164.955	160.426	9.48979	13.9354	0.0581798	0.0886741	2.21678	2.20393	0.0252458	0.0384353	-0.0426899	-0.409318	-0.597711	0.641378	0	0	0	0	0	0
sp|P06730|IF4E_HUMAN	P06730	sp|P06730|IF4E_HUMAN	>sp|P06730|IF4E_HUMAN Eukaryotic translation initiation factor 4E OS=Homo sapiens GN=EIF4E PE=1 SV=2	EIF4E	EIF4E	1977	1	134.443	125.777	122.904	139.129	113.646	95.9325	92.6106	99.2968	92.8008	78.4141	2.43484e-07	2.22367e-05	0.000106435	3.82038e-07	3.21258e-05	0.000742575	7.70651e-05	0.00128641	1.24799e-05	0.001107	5	5	127.18	91.811	9.98672	7.97057	0.0792891	0.0911402	2.10334	1.9615	0.0343809	0.0394998	-0.471164	-1.71913	-6.02312	0.000504868	-1	0	0	0	0	0
sp|O43432-4|IF4G3_HUMAN	O43432-4	sp|O43432-4|IF4G3_HUMAN	>sp|O43432-4|IF4G3_HUMAN Isoform of O43432, Isoform 4 of Eukaryotic translation initiation factor 4 gamma 3 OS=Homo sapiens GN=EIF4G3	EIF4G3	EIF4G3	8672	1	117.141	143.853	142.976	140.608	148.52	110.614	143.725	172.022	147.666	106.295	3.03297e-05	1.85145e-06	3.98631e-06	6.69525e-07	1.72736e-05	0.000113474	0.000303533	1.71705e-06	1.32012e-05	2.4478e-06	5	5	138.62	136.064	12.3459	27.4782	0.0945212	0.206579	2.14034	2.12654	0.0409588	0.0887805	-0.0458203	-0.210308	-0.349602	0.793093	0	0	0	0	0	0
sp|Q15056-2|IF4H_HUMAN	Q15056-2	sp|Q15056-2|IF4H_HUMAN	>sp|Q15056-2|IF4H_HUMAN Isoform of Q15056, Isoform Short of Eukaryotic translation initiation factor 4H OS=Homo sapiens GN=EIF4H	EIF4H	EIF4H	7458	2	423.123	500.461	504.316	549.954	478.6	470.494	423.656	474.821	482.159	408.537	1.03436e-07	1.16318e-08	4.28599e-10	9.17199e-09	1.72897e-08	1.7012e-07	1.81496e-09	1.95576e-09	3.37134e-08	6.41238e-08	5	5	491.291	451.933	46.106	33.4094	0.0959829	0.0752609	2.68977	2.6541	0.0415893	0.0326393	-0.118473	-0.892848	-1.50403	0.226436	0	0	0	0	0	0
sp|P55010|IF5_HUMAN	P55010	sp|P55010|IF5_HUMAN	>sp|P55010|IF5_HUMAN Eukaryotic translation initiation factor 5 OS=Homo sapiens GN=EIF5 PE=1 SV=2	EIF5	EIF5	1983	1	142.43	126.146	150.606	165.857	142.978	164.78	174.707	165.619	168.089	155.524	2.57725e-08	0.000105996	0.00230882	1.18631e-05	0.000118635	1.12701e-05	1.98865e-06	7.78477e-07	5.2005e-05	9.38561e-06	5	5	145.603	165.744	14.4116	6.91435	0.0995161	0.0420126	2.16146	2.21913	0.0431129	0.0182378	0.19157	1.3238	2.65008	0.0442002	0	1	0	0	0	0
tr|I3L397|I3L397_HUMAN	I3L397	tr|I3L397|I3L397_HUMAN	>tr|I3L397|I3L397_HUMAN Isoform of P63241, Eukaryotic translation initiation factor 5A (Fragment) OS=Homo sapiens GN=EIF5A PE=1 SV=7	EIF5A	EIF5A	1984	2	423.947	423.643	358.749	369.422	331.349	495.829	417.426	408.188	390.685	448.744	7.08476e-08	2.57363e-05	1.41626e-08	9.28742e-07	3.98507e-08	1.95312e-07	6.13735e-08	8.35122e-07	2.50042e-07	2.19458e-08	5	5	381.422	432.174	41.0986	41.3541	0.108332	0.0935907	2.57938	2.63412	0.0469108	0.0405573	0.181834	1.0858	2.04464	0.106218	0	1	0	0	0	0
tr|B1AM48|B1AM48_HUMAN	B1AM48	tr|B1AM48|B1AM48_HUMAN	>tr|B1AM48|B1AM48_HUMAN Isoform of Q12926, ELAV-like protein (Fragment) OS=Homo sapiens GN=ELAVL2 PE=1 SV=1	ELAVL2	ELAVL2	1993	1	124.861	91.3594	98.0403	117.191	142.077	98.797	130.193	110.803	129.845	141.084	1.8082e-08	5.8461e-06	8.27267e-07	6.9278e-09	7.30223e-07	7.54674e-09	1.41642e-09	6.3829e-06	1.51743e-08	4.65932e-09	5	5	114.706	122.144	20.5017	17.0036	0.181082	0.144587	2.054	2.08336	0.0780095	0.0624687	0.0975196	0.429193	0.729456	0.56654	0	1	0	0	0	0
sp|Q5R3F8|PPR29_HUMAN	Q5R3F8	sp|Q5R3F8|PPR29_HUMAN	>sp|Q5R3F8|PPR29_HUMAN Protein phosphatase 1 regulatory subunit 29 OS=Homo sapiens GN=ELFN2 PE=1 SV=1	ELFN2	ELFN2	114794	5	862.551	810.114	887.206	791.782	922.351	765.832	751.399	819.973	822.375	808.894	1.54281e-08	5.75257e-08	3.53244e-09	5.77162e-08	6.09705e-08	6.35886e-08	7.18709e-08	1.42625e-07	4.93473e-07	7.02479e-08	5	5	854.801	793.695	53.9479	32.823	0.0632807	0.0417148	2.93117	2.89935	0.027455	0.0181086	-0.105699	-1.15267	-1.80593	0.150521	0	0	0	0	0	0
tr|Q5JVZ5|Q5JVZ5_HUMAN	Q5JVZ5	tr|Q5JVZ5|Q5JVZ5_HUMAN	>tr|Q5JVZ5|Q5JVZ5_HUMAN Isoform of Q96JJ3, Engulfment and cell motility protein 2 OS=Homo sapiens GN=ELMO2 PE=1 SV=1	ELMO2	ELMO2	63916	4	777.287	739.217	746.786	742.082	676.186	803.694	777.065	784.272	767.48	886.46	5.19331e-07	2.36305e-06	2.27412e-07	4.68061e-07	3.08084e-06	2.53985e-06	8.60157e-07	1.86941e-06	6.75763e-06	1.80255e-06	5	5	736.312	803.794	36.8968	48.0829	0.0511705	0.0580554	2.86661	2.90455	0.0222086	0.0251919	0.126016	1.26379	2.12991	0.0944286	0	1	0	0	0	0
sp|Q8N766-3|EMC1_HUMAN	Q8N766-3	sp|Q8N766-3|EMC1_HUMAN	>sp|Q8N766-3|EMC1_HUMAN Isoform of Q8N766, Isoform 3 of ER membrane protein complex subunit 1 OS=Homo sapiens GN=EMC1	EMC1	EMC1	23065	1	41.8496	63.1636	40.6392	55.2941	62.0124	62.6528	66.8351	55.9224	62.0472	73.0158	0.00210748	0.0043858	0.00413997	0.0153873	0.000187135	3.80902e-08	1.28993e-08	7.29269e-05	5.24141e-07	5.52343e-06	5	5	52.5918	64.0947	10.7944	6.32759	0.214742	0.0987726	1.71325	1.80513	0.0922123	0.0427923	0.305225	1.10309	2.24804	0.0803404	0	1	0	0	0	0
sp|Q15006|EMC2_HUMAN	Q15006	sp|Q15006|EMC2_HUMAN	>sp|Q15006|EMC2_HUMAN ER membrane protein complex subunit 2 OS=Homo sapiens GN=EMC2 PE=1 SV=1	EMC2	EMC2	9694	1	77.3319	88.6984	67.6857	72.3495	78.203	85.1826	85.8372	70.9536	74.8903	76.1294	2.75443e-08	3.35216e-05	2.50226e-07	4.67681e-06	1.08811e-07	4.90592e-07	4.24833e-08	3.06967e-06	5.10981e-09	3.70931e-10	5	5	76.8537	78.5986	7.85313	6.59622	0.100987	0.0838406	1.88389	1.8942	0.0437471	0.0363478	0.0342477	0.269143	0.411742	0.752809	0	1	0	0	0	0
sp|Q9BV81|EMC6_HUMAN	Q9BV81	sp|Q9BV81|EMC6_HUMAN	>sp|Q9BV81|EMC6_HUMAN ER membrane protein complex subunit 6 OS=Homo sapiens GN=EMC6 PE=1 SV=1	EMC6	EMC6	83460	1	76.8486	92.2068	79.6719	68.544	90.6577	68.629	86.8344	100.118	87.5147	85.9569	1.80447e-07	0.000305949	9.23795e-06	1.10503e-06	3.01949e-07	1.42134e-08	1.33248e-09	2.93495e-08	1.83658e-07	2.85338e-07	5	5	81.5858	85.8106	9.89062	11.2236	0.123341	0.136618	1.90902	1.93041	0.0533644	0.0590584	0.0710856	0.394451	0.650324	0.610004	0	1	0	0	0	0
tr|G3V500|G3V500_HUMAN	G3V500	tr|G3V500|G3V500_HUMAN	>tr|G3V500|G3V500_HUMAN Isoform of O00423, Echinoderm microtubule-associated protein-like 1 (Fragment) OS=Homo sapiens GN=EML1 PE=1 SV=1	EML1	EML1	2009	1	519.032	427.442	436.441	418.866	515.386	1390.61	1229.08	1138.34	1350.24	1476.5	7.28517e-08	6.9299e-07	2.25265e-09	5.7821e-06	8.59515e-09	8.23491e-09	2.09753e-09	4.70873e-08	4.58936e-09	1.73073e-09	5	5	463.434	1316.95	49.4989	133.802	0.105635	0.103455	2.66404	3.11774	0.0457494	0.0448103	1.50715	1.86783	16.52	5.25989e-07	1	1	0	0	0	0
sp|O95834-2|EMAL2_HUMAN	O95834-2	sp|O95834-2|EMAL2_HUMAN	>sp|O95834-2|EMAL2_HUMAN Isoform of O95834, Isoform 2 of Echinoderm microtubule-associated protein-like 2 OS=Homo sapiens GN=EML2	EML2	EML2	24139	1	45.2646	37.9607	40.4271	43.2282	56.2147	74.2717	89.801	81.1418	93.5523	73.1024	0.00928612	0.00460024	0.15037	0.00551007	0.00059086	8.55665e-05	2.34023e-06	2.64469e-05	5.15753e-06	3.4322e-05	5	5	44.6191	82.3738	7.04836	9.12746	0.150845	0.110713	1.64548	1.91367	0.065143	0.0479357	0.890909	1.77276	8.03893	7.66356e-05	1	1	0	0	0	0
sp|Q8N8S7-3|ENAH_HUMAN	Q8N8S7-3	sp|Q8N8S7-3|ENAH_HUMAN	>sp|Q8N8S7-3|ENAH_HUMAN Isoform of Q8N8S7, Isoform 3 of Protein enabled homolog OS=Homo sapiens GN=ENAH	ENAH	ENAH	55740	1	118.763	128.243	158.794	136.471	149.341	156.482	157.175	187.112	179.445	164.55	6.59179e-05	0.000147919	4.60673e-05	0.00951236	3.69431e-06	2.73314e-05	1.38677e-06	8.02867e-05	3.6823e-05	0.000129752	5	5	138.322	168.953	16.032	13.7245	0.116506	0.0804662	2.13855	2.22664	0.0504273	0.0348897	0.292606	1.42396	3.31939	0.0168836	0	1	0	0	0	0
sp|P06733|ENOA_HUMAN	P06733	sp|P06733|ENOA_HUMAN	>sp|P06733|ENOA_HUMAN Alpha-enolase OS=Homo sapiens GN=ENO1 PE=1 SV=2	ENO1	ENO1	2023	4	4451.08	4726.76	5425.33	5266.16	4943.78	3359	3376.99	3242.83	3159.03	2978.9	2.75864e-08	4.34754e-06	1.71457e-07	7.81003e-06	1.09055e-05	2.06777e-08	8.50153e-07	3.42889e-06	1.06497e-05	3.3759e-07	5	5	4962.62	3223.35	394.934	163.003	0.0802203	0.0513289	3.6946	3.50785	0.0347834	0.0222772	-0.62036	-1.8272	-9.31155	2.75203e-05	-1	0	0	0	0	0
sp|P09104|ENOG_HUMAN	P09104	sp|P09104|ENOG_HUMAN	>sp|P09104|ENOG_HUMAN Gamma-enolase OS=Homo sapiens GN=ENO2 PE=1 SV=3	ENO2	ENO2	2026	8	11545.8	9579.46	9847.49	10593.4	9580.15	8831.93	8311.98	7680.98	8049.6	7733.76	7.6749e-09	3.5961e-08	7.31552e-10	8.40507e-08	6.34665e-09	4.26358e-08	2.21391e-08	7.57597e-09	4.89371e-09	7.70811e-09	5	5	10229.3	8121.65	844.879	471.851	0.0805969	0.0573698	4.0087	3.90907	0.0349461	0.0248949	-0.33097	-1.66619	-4.84978	0.00202635	-1	0	0	0	0	0
sp|P13929-3|ENOB_HUMAN	P13929-3	sp|P13929-3|ENOB_HUMAN	>sp|P13929-3|ENOB_HUMAN Isoform of P13929, Isoform 3 of Beta-enolase OS=Homo sapiens GN=ENO3	ENO3	ENO3	2027	3	542.813	732.866	788.999	663.659	780.472	905.443	961.396	1048.98	865.173	783.531	0.228647	0.248143	0.20223	0.0559626	0.0659292	4.09169e-09	9.13142e-10	5.61573e-09	1.30645e-09	2.58243e-08	5	5	701.762	912.905	101.845	99.9251	0.155498	0.110074	2.84221	2.95834	0.0671292	0.0476608	0.385767	1.41258	3.42778	0.0144141	0	1	0	0	0	0
tr|A0A087WTH0|A0A087WTH0_HUMAN	A0A087WTH0	tr|A0A087WTH0|A0A087WTH0_HUMAN	>tr|A0A087WTH0|A0A087WTH0_HUMAN Isoform of Q9UHY7, Enolase-phosphatase E1 OS=Homo sapiens GN=ENOPH1 PE=1 SV=2	ENOPH1	ENOPH1	58478	1	91.0672	84.5535	83.9245	72.7829	94.6807	116.295	103.135	100.205	93.9611	89.748	9.68059e-07	0.00210572	1.76728e-06	0.00441246	2.56047e-06	2.26462e-07	1.25073e-08	0.000244803	4.36271e-07	8.99546e-09	5	5	85.4017	100.669	8.37158	10.1825	0.101069	0.0993517	1.92973	2.00117	0.0437821	0.043042	0.237291	1.28447	2.68928	0.0416933	0	1	0	0	0	0
sp|O43768-6|ENSA_HUMAN	O43768-6	sp|O43768-6|ENSA_HUMAN	>sp|O43768-6|ENSA_HUMAN Isoform of O43768, Isoform 6 of Alpha-endosulfine OS=Homo sapiens GN=ENSA	ENSA	ENSA	2029	1	31.4984	83.8786	84.0738	91.7039	48.1717	157.787	116.49	56.0523	116.942	104.784	0.297422	4.91689e-07	0.0168804	4.05161e-06	0.000226211	5.39454e-07	7.69012e-07	0.000679734	5.9354e-07	3.35597e-07	5	5	67.8653	110.411	26.4472	36.4368	0.489334	0.39583	1.79836	2.02024	0.201218	0.165691	0.737094	1.05934	2.20365	0.0851706	0	1	0	0	0	0
sp|Q9H4G0-2|E41L1_HUMAN;sp|Q9H4G0|E41L1_HUMAN;tr|A0A0C4DH22|A0A0C4DH22_HUMAN	Q9H4G0-2;Q9H4G0;A0A0C4DH22	sp|Q9H4G0-2|E41L1_HUMAN;sp|Q9H4G0|E41L1_HUMAN;tr|A0A0C4DH22|A0A0C4DH22_HUMAN	>sp|Q9H4G0-2|E41L1_HUMAN Isoform of Q9H4G0, Isoform 2 of Band 4.1-like protein 1 OS=Homo sapiens GN=EPB41L1;>sp|Q9H4G0|E41L1_HUMAN Band 4.1-like protein 1 OS=Homo sapiens GN=EPB41L1 PE=1 SV=2;>tr|A0A0C4DH22|A0A0C4DH22_HUMAN Isoform of Q9H4G0, Band 4.1-like protein 1 OS=Homo sapiens GN=EPB41L1 PE=1 SV=1	EPB41L1	EPB41L1	2036	8	2986.03	2849.6	2846.51	2302.78	2957.59	3159.12	3133.49	2826.45	2914.44	3362.97	4.90701e-08	8.86856e-09	1.47878e-09	1.75666e-08	2.45379e-08	2.40643e-08	3.06619e-09	7.90588e-09	4.76156e-09	3.58544e-09	5	5	2788.5	3079.29	278.671	212.656	0.107049	0.0691399	3.44348	3.48762	0.0463584	0.0299913	0.146651	1.01378	1.80295	0.150905	0	1	0	0	0	0
sp|O43491-4|E41L2_HUMAN;sp|O43491-3|E41L2_HUMAN	O43491-4;O43491-3	sp|O43491-4|E41L2_HUMAN;sp|O43491-3|E41L2_HUMAN	>sp|O43491-4|E41L2_HUMAN Isoform of O43491, Isoform 4 of Band 4.1-like protein 2 OS=Homo sapiens GN=EPB41L2;>sp|O43491-3|E41L2_HUMAN Isoform of O43491, Isoform 3 of Band 4.1-like protein 2 OS=Homo sapiens GN=EPB41L2	EPB41L2	EPB41L2	2037	1	96.0295	94.1381	89.0632	103.795	76.8295	143.773	161.971	186.253	192.233	184.913	0.0344956	0.00230102	0.000476333	0.0123679	0.00427104	2.27809e-06	1.23926e-07	7.42561e-08	7.46797e-08	2.14039e-06	5	5	91.971	173.829	9.98366	20.371	0.112497	0.122497	1.96151	2.2376	0.0487031	0.0530019	0.917147	1.80191	9.13703	3.11455e-05	1	1	0	0	0	0
sp|Q9Y2J2-2|E41L3_HUMAN;tr|A0A0A0MRA8|A0A0A0MRA8_HUMAN;sp|Q9Y2J2|E41L3_HUMAN	Q9Y2J2-2;A0A0A0MRA8;Q9Y2J2	sp|Q9Y2J2-2|E41L3_HUMAN;tr|A0A0A0MRA8|A0A0A0MRA8_HUMAN;sp|Q9Y2J2|E41L3_HUMAN	>sp|Q9Y2J2-2|E41L3_HUMAN Isoform of Q9Y2J2, Isoform 2 of Band 4.1-like protein 3 OS=Homo sapiens GN=EPB41L3;>tr|A0A0A0MRA8|A0A0A0MRA8_HUMAN Isoform of Q9Y2J2, Band 4.1-like protein 3 OS=Homo sapiens GN=EPB41L3 PE=1 SV=1;>sp|Q9Y2J2|E41L3_HUMAN Band 4.1-like protein 3 OS=Homo sapiens GN=EPB41L3 PE=1 SV=2	EPB41L3	EPB41L3	23136	8	4475.36	4323.21	4237.78	3440.65	4094.55	3070.92	2936.09	3082.43	3220.22	2890.4	9.03556e-09	5.60478e-08	7.87941e-10	7.84269e-09	6.31121e-09	3.59557e-08	1.19668e-08	1.91344e-08	9.2661e-09	4.9855e-07	5	5	4114.31	3040.01	401.076	130.779	0.103126	0.0429287	3.61252	3.48256	0.0446688	0.0186351	-0.431748	-1.71647	-5.83715	0.000636654	-1	0	0	0	0	0
sp|P54764|EPHA4_HUMAN	P54764	sp|P54764|EPHA4_HUMAN	>sp|P54764|EPHA4_HUMAN Ephrin type-A receptor 4 OS=Homo sapiens GN=EPHA4 PE=1 SV=1	EPHA4	EPHA4	2043	9	1580.73	1777.11	1715.02	1619.73	1515.31	1277.55	1342.29	1515.1	1415.22	1325.73	1.50671e-07	2.123e-07	4.31586e-08	1.27095e-07	1.98397e-07	2.28984e-08	5.60691e-09	1.57396e-08	4.72105e-08	3.34696e-07	5	5	1641.58	1375.18	104.744	92.5198	0.0637192	0.0663053	3.21456	3.13759	0.0276449	0.0287645	-0.255681	-1.58672	-3.92068	0.007092	0	0	0	0	0	0
sp|P29323-2|EPHB2_HUMAN	P29323-2	sp|P29323-2|EPHB2_HUMAN	>sp|P29323-2|EPHB2_HUMAN Isoform of P29323, Isoform 2 of Ephrin type-B receptor 2 OS=Homo sapiens GN=EPHB2	EPHB2	EPHB2	2048	1	114.515	98.9814	112.173	109.058	111.966	83.114	70.5452	88.0062	96.4796	94.049	2.62205e-08	2.72452e-08	4.47906e-09	2.09102e-07	1.7898e-05	9.13075e-06	1.04314e-05	0.00021113	1.91521e-06	1.37688e-07	5	5	109.339	86.4388	6.10497	10.3059	0.0576248	0.125145	2.03821	1.93409	0.0250054	0.0541386	-0.345882	-1.53652	-4.01006	0.00626462	0	0	0	0	0	0
sp|Q9Y6I3-3|EPN1_HUMAN	Q9Y6I3-3	sp|Q9Y6I3-3|EPN1_HUMAN	>sp|Q9Y6I3-3|EPN1_HUMAN Isoform of Q9Y6I3, Isoform 3 of Epsin-1 OS=Homo sapiens GN=EPN1	EPN1	EPN1	29924	1	306.56	328.767	342.103	391.931	304.82	176.561	125.288	237.43	182.837	136.35	1.39408e-08	2.39655e-08	1.014e-10	2.24017e-09	8.98102e-09	1.28429e-08	4.63653e-09	1.27023e-08	1.21731e-09	3.01731e-08	5	5	334.836	171.693	35.5316	44.3614	0.102858	0.258539	2.52296	2.22341	0.0445532	0.110471	-0.995086	-1.69502	-6.33324	0.000379665	-1	0	0	0	1	0
tr|E9PBC1|E9PBC1_HUMAN	E9PBC1	tr|E9PBC1|E9PBC1_HUMAN	>tr|E9PBC1|E9PBC1_HUMAN Isoform of O95208, Epsin-2 OS=Homo sapiens GN=EPN2 PE=1 SV=1	EPN2	EPN2	22905	1	83.8358	106.774	88.5696	92.2071	103.186	98.4631	126.504	134.37	118.777	103.966	6.94472e-07	2.52344e-06	6.5551e-09	2.48185e-08	5.3574e-07	7.01332e-06	3.50706e-08	1.44421e-08	7.60435e-09	1.5745e-08	5	5	94.9144	116.416	9.73884	15.0583	0.102474	0.131421	1.97551	2.06306	0.0443876	0.0568311	0.290833	1.31386	2.89302	0.030593	0	1	0	0	1	0
sp|Q9UBC2-3|EP15R_HUMAN	Q9UBC2-3	sp|Q9UBC2-3|EP15R_HUMAN	>sp|Q9UBC2-3|EP15R_HUMAN Isoform of Q9UBC2, Isoform 3 of Epidermal growth factor receptor substrate 15-like 1 OS=Homo sapiens GN=EPS15L1	EPS15L1	EPS15L1	58513	4	547.619	557.19	575.248	586.847	560.702	564.047	569.986	526.624	544.183	585.271	7.06733e-08	1.44211e-07	1.52406e-07	1.71458e-06	4.3694e-07	1.03259e-07	7.79733e-08	2.78824e-06	3.72741e-07	5.21964e-07	5	5	565.521	558.022	15.5122	22.9091	0.0273403	0.0413108	2.75232	2.74636	0.0118715	0.0179334	-0.0198055	-0.406186	-0.4025	0.759137	0	0	0	0	1	0
sp|Q96RT1-7|LAP2_HUMAN	Q96RT1-7	sp|Q96RT1-7|LAP2_HUMAN	>sp|Q96RT1-7|LAP2_HUMAN Isoform of Q96RT1, Isoform 7 of Protein LAP2 OS=Homo sapiens GN=ERBB2IP	ERBB2IP	ERBB2IP	55914	1	349.689	335.269	359.373	380.371	463.808	269.159	212.439	281.924	291.172	276.73	0.000109791	3.47192e-05	5.79633e-07	1.97577e-05	7.82387e-06	1.78531e-05	5.16565e-05	1.04484e-05	1.10609e-05	2.58703e-06	5	5	377.702	266.285	50.8492	31.1476	0.127611	0.126687	2.57423	2.42272	0.0551971	0.0548005	-0.503328	-1.59132	-4.69671	0.00247708	-1	0	0	0	0	0
sp|Q8IUD2-4|RB6I2_HUMAN	Q8IUD2-4	sp|Q8IUD2-4|RB6I2_HUMAN	>sp|Q8IUD2-4|RB6I2_HUMAN Isoform of Q8IUD2, Isoform 4 of ELKS/Rab6-interacting/CAST family member 1 OS=Homo sapiens GN=ERC1	ERC1	ERC1	23085	7	535.883	471.125	518.699	1135.73	521.588	685.728	718.607	705.207	688.106	698.424	3.36011e-06	5.13438e-06	1.01886e-06	1.77272e-05	8.72953e-06	4.0694e-07	5.09165e-08	2.22242e-07	3.70341e-07	1.07159e-07	5	5	636.605	699.214	280.083	13.3969	0.372303	0.0190952	2.77794	2.84455	0.156471	0.0082922	0.221247	0.604371	1.08609	0.3831	0	1	0	0	0	0
tr|H7C4G9|H7C4G9_HUMAN;sp|O15083|ERC2_HUMAN	H7C4G9;O15083	tr|H7C4G9|H7C4G9_HUMAN;sp|O15083|ERC2_HUMAN	>tr|H7C4G9|H7C4G9_HUMAN Isoform of O15083, ERC protein 2 (Fragment) OS=Homo sapiens GN=ERC2 PE=1 SV=1;>sp|O15083|ERC2_HUMAN ERC protein 2 OS=Homo sapiens GN=ERC2 PE=1 SV=3	ERC2	ERC2	26059	11	4149.14	3438.8	3440.68	3663.83	3726.7	3135.46	2845.74	3210.21	3458.88	3401.47	2.33128e-08	1.6473e-07	3.14716e-09	4.65327e-09	2.37083e-08	4.2702e-08	2.71909e-08	7.03468e-08	1.36511e-08	7.94074e-09	5	5	3683.83	3210.35	290.652	243.331	0.0770616	0.0775221	3.56525	3.50553	0.0334179	0.033617	-0.198409	-1.33905	-2.72134	0.0398771	0	0	0	0	0	0
sp|Q969X5-2|ERGI1_HUMAN	Q969X5-2	sp|Q969X5-2|ERGI1_HUMAN	>sp|Q969X5-2|ERGI1_HUMAN Isoform of Q969X5, Isoform 2 of Endoplasmic reticulum-Golgi intermediate compartment protein 1 OS=Homo sapiens GN=ERGIC1	ERGIC1	ERGIC1	57222	2	207.708	260.738	206.276	205.103	194.752	160.32	202.459	238.816	228.494	169.163	0.00203583	9.91144e-06	9.38702e-06	0.000527172	1.71425e-05	2.76933e-06	1.0511e-05	2.48519e-05	4.69021e-05	2.19403e-06	5	5	214.915	199.85	26.1204	34.8208	0.114326	0.178479	2.32991	2.29531	0.04949	0.0769057	-0.114933	-0.543676	-0.931063	0.456138	0	0	0	0	0	0
sp|O94905|ERLN2_HUMAN	O94905	sp|O94905|ERLN2_HUMAN	>sp|O94905|ERLN2_HUMAN Erlin-2 OS=Homo sapiens GN=ERLIN2 PE=1 SV=1	ERLIN2	ERLIN2	11160	3	499.947	485.506	496.782	486.896	551.718	316.071	300.305	307.244	353.665	348.31	2.15532e-08	6.90716e-07	4.59279e-09	1.46694e-07	8.80059e-08	0.000217558	0.000262699	3.40163e-05	5.49896e-07	9.15802e-07	5	5	504.17	325.119	27.2949	24.34	0.0525797	0.0744373	2.70209	2.51108	0.0228193	0.032283	-0.634521	-1.83551	-9.78364	1.97637e-05	-1	0	0	0	0	0
tr|B4DIZ1|B4DIZ1_HUMAN	B4DIZ1	tr|B4DIZ1|B4DIZ1_HUMAN	>tr|B4DIZ1|B4DIZ1_HUMAN Isoform of Q8TAM6, Ermin OS=Homo sapiens GN=ERMN PE=1 SV=1	ERMN	ERMN	57471	1	61.4202	53.8157	39.3283	69.3611	50.7912	114.463	132.803	105.165	144.07	131.845	2.79731e-08	1.69369e-05	6.50343e-07	0.00558527	6.83294e-06	2.60808e-08	6.84156e-09	8.7294e-08	4.92645e-10	4.16144e-10	5	5	54.9433	125.669	11.3155	15.6015	0.216681	0.127272	1.73217	2.09648	0.0930258	0.0550514	1.21021	1.77638	8.42691	5.46191e-05	1	1	0	0	0	0
tr|E7ER77|E7ER77_HUMAN	E7ER77	tr|E7ER77|E7ER77_HUMAN	>tr|E7ER77|E7ER77_HUMAN Isoform of Q7Z2K6, Endoplasmic reticulum metallopeptidase 1 OS=Homo sapiens GN=ERMP1 PE=1 SV=1	ERMP1	ERMP1	79956	1	60.3173	71.2676	45.0932	44.9324	60.9692	54.9274	60.0922	72.9164	61.9887	70.4883	1.23168e-05	3.64515e-09	1.34755e-07	2.27682e-06	6.14301e-07	0.000562857	5.29632e-07	7.81944e-09	1.29828e-05	3.32748e-07	5	5	56.5159	64.0826	11.3639	7.46983	0.205854	0.117242	1.74502	1.80437	0.0884755	0.0507439	0.197154	0.792953	1.44772	0.24318	0	1	0	0	0	0
sp|P30040|ERP29_HUMAN	P30040	sp|P30040|ERP29_HUMAN	>sp|P30040|ERP29_HUMAN Endoplasmic reticulum resident protein 29 OS=Homo sapiens GN=ERP29 PE=1 SV=4	ERP29	ERP29	10961	2	540.559	578.234	548.091	515.11	514.478	621.17	657.597	713.397	689.174	717.378	8.44631e-08	7.90682e-06	1.64067e-06	0.000822559	1.78626e-06	9.2212e-08	4.74791e-09	1.11412e-08	8.61174e-08	0.000310429	5	5	539.294	679.743	26.4386	40.4943	0.0486279	0.0605436	2.73141	2.83172	0.0211063	0.0262697	0.333199	1.74623	5.62165	0.000818788	1	1	0	0	0	0
sp|P13804|ETFA_HUMAN	P13804	sp|P13804|ETFA_HUMAN	>sp|P13804|ETFA_HUMAN Electron transfer flavoprotein subunit alpha, mitochondrial OS=Homo sapiens GN=ETFA PE=1 SV=1	ETFA	ETFA	2108	3	663.69	582.776	600.632	590.576	546.818	535.654	488.44	450.659	475.99	543.708	1.26284e-05	1.82381e-05	4.93587e-06	0.00014653	8.89096e-06	9.65543e-06	1.32595e-05	0.000132847	1.64234e-05	5.56001e-06	5	5	596.898	498.89	42.4927	39.7496	0.0701494	0.0798418	2.77504	2.6969	0.0304281	0.0346198	-0.259567	-1.52071	-3.62861	0.0105932	0	0	0	0	0	0
sp|Q16134|ETFD_HUMAN	Q16134	sp|Q16134|ETFD_HUMAN	>sp|Q16134|ETFD_HUMAN Electron transfer flavoprotein-ubiquinone oxidoreductase, mitochondrial OS=Homo sapiens GN=ETFDH PE=1 SV=2	ETFDH	ETFDH	2110	4	1035.32	896.873	1003.85	893.075	1191.48	758.712	780.061	810.089	921.443	817.31	7.6353e-07	2.02573e-06	1.2303e-08	6.39012e-05	2.16723e-08	6.43316e-08	1.97996e-07	2.61125e-07	1.76826e-07	5.01554e-08	5	5	1004.12	817.523	122.382	62.6833	0.119306	0.0745189	2.99929	2.91152	0.0516308	0.0323184	-0.29157	-1.42592	-3.32504	0.0167594	0	0	0	0	0	0
tr|B8ZZF5|B8ZZF5_HUMAN	B8ZZF5	tr|B8ZZF5|B8ZZF5_HUMAN	>tr|B8ZZF5|B8ZZF5_HUMAN Isoform of Q9H8M9, Protein eva-1 homolog A OS=Homo sapiens GN=EVA1A PE=1 SV=1	EVA1A	EVA1A	84141	1	195.634	220.651	196.407	208.976	233.162	149.779	112.066	74.0903	121.33	111.805	0.000310361	2.44619e-06	1.76289e-06	3.03768e-05	6.25514e-07	0.000135231	0.193111	0.301159	5.16358e-07	2.60598e-06	5	5	210.966	113.814	16.105	27.088	0.0757592	0.259796	2.32321	2.04542	0.0328547	0.110991	-0.922795	-1.67849	-6.03187	0.0005025	-1	0	0	0	0	0
sp|Q9NV70-2|EXOC1_HUMAN	Q9NV70-2	sp|Q9NV70-2|EXOC1_HUMAN	>sp|Q9NV70-2|EXOC1_HUMAN Isoform of Q9NV70, Isoform 2 of Exocyst complex component 1 OS=Homo sapiens GN=EXOC1	EXOC1	EXOC1	55763	3	279.743	305.285	322.749	269.358	289.234	320.756	330.125	311.167	327.645	327.83	4.9564e-06	1.19644e-06	4.51686e-05	0.000243574	2.05093e-06	1.17178e-07	1.31239e-07	1.17635e-06	6.30178e-07	1.06598e-07	5	5	293.274	323.505	21.1211	7.73724	0.0715425	0.0241544	2.46638	2.50978	0.0310309	0.0104886	0.144166	1.37236	2.46831	0.0580443	0	1	0	0	0	0
sp|Q96KP1|EXOC2_HUMAN	Q96KP1	sp|Q96KP1|EXOC2_HUMAN	>sp|Q96KP1|EXOC2_HUMAN Exocyst complex component 2 OS=Homo sapiens GN=EXOC2 PE=1 SV=1	EXOC2	EXOC2	55770	3	285.459	259.787	245.866	247.955	244.605	287.764	288.372	233.671	266.89	306.171	1.59539e-06	1.3184e-05	2.53158e-06	1.01742e-05	5.19067e-06	5.09959e-08	4.83976e-09	1.90358e-06	3.92767e-07	2.92454e-08	5	5	256.734	276.574	17.1519	27.7258	0.0648698	0.104265	2.40874	2.43998	0.028143	0.0451592	0.103772	0.798767	1.31117	0.289608	0	1	0	0	0	0
sp|O60645-2|EXOC3_HUMAN	O60645-2	sp|O60645-2|EXOC3_HUMAN	>sp|O60645-2|EXOC3_HUMAN Isoform of O60645, Isoform 2 of Exocyst complex component 3 OS=Homo sapiens GN=EXOC3	EXOC3	EXOC3	11336	4	467.713	470.384	444.978	366.925	439.855	557.985	581.277	531.405	559.469	570.655	2.72894e-07	4.60729e-06	1.36275e-05	1.45127e-05	2.04338e-05	2.01835e-05	6.65967e-06	1.47126e-05	2.99503e-06	1.09616e-06	5	5	437.971	560.158	41.9385	18.6289	0.10142	0.0335755	2.63973	2.74812	0.0439335	0.0145775	0.360046	1.66935	5.01876	0.00164289	1	1	0	0	0	0
sp|Q96A65|EXOC4_HUMAN	Q96A65	sp|Q96A65|EXOC4_HUMAN	>sp|Q96A65|EXOC4_HUMAN Exocyst complex component 4 OS=Homo sapiens GN=EXOC4 PE=1 SV=1	EXOC4	EXOC4	60412	4	831.52	854.114	816.605	659.4	741.41	952.06	946.748	847.366	887.819	1009.72	4.99408e-09	1.81908e-07	1.74497e-07	6.39189e-08	1.01172e-06	1.11527e-07	6.07111e-09	5.70332e-09	2.87447e-07	1.93551e-08	5	5	780.61	928.742	79.8732	62.6927	0.106549	0.0678901	2.89052	2.9671	0.0461429	0.0294504	0.254384	1.40735	3.14758	0.021422	0	1	0	0	0	0
sp|O00471|EXOC5_HUMAN	O00471	sp|O00471|EXOC5_HUMAN	>sp|O00471|EXOC5_HUMAN Exocyst complex component 5 OS=Homo sapiens GN=EXOC5 PE=1 SV=1	EXOC5	EXOC5	10640	3	338.441	273.643	169.927	266.594	283.997	360.152	367.518	306.959	295.967	326.623	1.23142e-08	7.01058e-07	1.59279e-07	1.63723e-06	5.5309e-06	6.62703e-08	2.74176e-08	1.59741e-07	1.12264e-05	1.13465e-06	5	5	266.52	331.444	60.9489	31.6498	0.259895	0.0956487	2.41522	2.51883	0.111032	0.0414451	0.344179	1.07876	2.2009	0.085426	0	1	0	0	0	0
sp|Q9Y2D4|EXC6B_HUMAN	Q9Y2D4	sp|Q9Y2D4|EXC6B_HUMAN	>sp|Q9Y2D4|EXC6B_HUMAN Exocyst complex component 6B OS=Homo sapiens GN=EXOC6B PE=1 SV=3	EXOC6B	EXOC6B	23233	2	140.042	185.646	187.319	207.246	150.355	198.369	203.626	206.672	192.675	222.295	3.49581e-07	2.11936e-05	0.000405799	3.83099e-05	6.22364e-05	1.23399e-08	4.38955e-08	1.11162e-05	2.06948e-08	6.89304e-07	5	5	174.121	204.727	27.9755	11.1723	0.165577	0.0538103	2.23623	2.31067	0.0714235	0.0233526	0.247295	1.1699	2.37623	0.0662067	0	1	0	0	0	0
tr|B4DJ07|B4DJ07_HUMAN;sp|Q9UPT5-2|EXOC7_HUMAN	B4DJ07;Q9UPT5-2	tr|B4DJ07|B4DJ07_HUMAN;sp|Q9UPT5-2|EXOC7_HUMAN	>tr|B4DJ07|B4DJ07_HUMAN Isoform of Q9UPT5, Exocyst complex component 7 OS=Homo sapiens GN=EXOC7 PE=1 SV=1;>sp|Q9UPT5-2|EXOC7_HUMAN Isoform of Q9UPT5, Isoform 2 of Exocyst complex component 7 OS=Homo sapiens GN=EXOC7	EXOC7	EXOC7	23265	4	514.768	504.771	474.574	417.465	509.722	603.025	626.72	525.784	556.554	670.354	0.00027779	1.48451e-05	9.23259e-05	0.000142284	0.000102969	1.1434e-06	8.05233e-06	9.14865e-05	1.38924e-07	4.95244e-07	5	5	484.26	596.487	40.4818	57.0235	0.087448	0.0961979	2.68379	2.77401	0.0379059	0.0416821	0.29968	1.48885	3.62882	0.0105932	0	1	0	0	0	0
tr|E7EQR4|E7EQR4_HUMAN	E7EQR4	tr|E7EQR4|E7EQR4_HUMAN	>tr|E7EQR4|E7EQR4_HUMAN Isoform of P15311, Ezrin OS=Homo sapiens GN=EZR PE=1 SV=3	EZR	EZR	7430	1	312.149	360.758	351.832	340.714	350.546	282.239	268.786	242.036	285.038	277.259	4.54285e-09	8.03935e-08	2.23587e-08	4.43442e-09	1.0582e-08	3.39148e-09	1.59296e-09	6.6038e-09	1.11506e-09	9.14361e-10	5	5	343.2	271.072	18.7557	17.3663	0.0561544	0.066323	2.53501	2.43234	0.0243683	0.0287721	-0.341067	-1.72077	-5.40828	0.00103614	-1	0	0	0	0	0
sp|O00519|FAAH1_HUMAN	O00519	sp|O00519|FAAH1_HUMAN	>sp|O00519|FAAH1_HUMAN Fatty-acid amide hydrolase 1 OS=Homo sapiens GN=FAAH PE=1 SV=2	FAAH	FAAH	2166	1	202.71	252.976	254.822	236.622	207.252	230.854	214.729	244.639	223.656	221.184	1.5705e-09	3.84159e-09	8.09778e-11	2.58715e-09	1.39742e-08	9.00061e-10	3.70078e-10	7.14915e-10	7.3259e-10	2.21691e-10	5	5	230.876	227.012	24.7298	11.4188	0.108914	0.0496823	2.36135	2.35562	0.0471613	0.0215634	-0.0190384	-0.165147	-0.245108	0.857491	0	0	0	0	0	0
tr|S4R371|S4R371_HUMAN	S4R371	tr|S4R371|S4R371_HUMAN	>tr|S4R371|S4R371_HUMAN Isoform of P05413, Fatty acid-binding protein, heart (Fragment) OS=Homo sapiens GN=FABP3 PE=1 SV=1	FABP3	FABP3	2170	2	320.638	403.921	397.859	478.74	328.904	172.878	142.389	144.929	135.821	113.291	5.4643e-09	9.5944e-08	4.87064e-10	3.00342e-09	2.17334e-08	0.0096847	0.061845	0.0144532	0.0233533	0.198249	5	5	386.012	141.862	64.4102	21.3571	0.166039	0.15222	2.58184	2.14791	0.0716202	0.06573	-1.4415	-1.82549	-11.0558	8.63657e-06	-1	0	0	0	0	0
sp|Q96CS3|FAF2_HUMAN	Q96CS3	sp|Q96CS3|FAF2_HUMAN	>sp|Q96CS3|FAF2_HUMAN FAS-associated factor 2 OS=Homo sapiens GN=FAF2 PE=1 SV=2	FAF2	FAF2	23197	2	170.908	135.663	132.065	142.641	146.572	166.464	135.576	162.958	148.459	162.482	2.09195e-06	1.66166e-07	1.53555e-07	1.86733e-06	6.78672e-06	1.76744e-07	1.03627e-06	7.84716e-07	6.1141e-06	3.67554e-07	5	5	145.57	155.188	15.2656	12.9481	0.100968	0.0861706	2.16126	2.1896	0.0437388	0.0373542	0.0941332	0.688597	1.12209	0.367283	0	1	0	0	0	0
sp|Q96GK7|FAH2A_HUMAN	Q96GK7	sp|Q96GK7|FAH2A_HUMAN	>sp|Q96GK7|FAH2A_HUMAN Fumarylacetoacetate hydrolase domain-containing protein 2A OS=Homo sapiens GN=FAHD2A PE=1 SV=1	FAHD2A	FAHD2A	51011	1	45.3803	54.9234	52.5012	45.0528	42.7886	132.913	119.264	99.8955	89.9783	119.186	1.67628e-06	1.12196e-05	1.51963e-08	1.97877e-05	2.07446e-05	7.54464e-09	1.59112e-09	5.20411e-09	1.5753e-08	5.60557e-08	5	5	48.1293	112.247	5.26348	17.124	0.108182	0.157375	1.68037	2.046	0.0468464	0.0679297	1.21459	1.82448	10.7709	1.04208e-05	1	1	0	0	0	0
sp|Q9H0Q0|FA49A_HUMAN	Q9H0Q0	sp|Q9H0Q0|FA49A_HUMAN	>sp|Q9H0Q0|FA49A_HUMAN Protein FAM49A OS=Homo sapiens GN=FAM49A PE=2 SV=1	FAM49A	FAM49A	81553	5	366.212	390.839	445.089	457.606	470.977	487.711	490.531	516.778	483.464	445.333	2.42342e-05	2.01027e-07	3.34601e-06	1.10576e-05	1.00254e-06	5.71899e-07	3.90466e-08	2.20302e-08	1.80826e-07	9.00125e-08	5	5	426.145	484.763	45.2685	25.6094	0.109082	0.0535758	2.62753	2.68504	0.0472335	0.023251	0.19102	1.24004	2.43246	0.0610637	0	1	0	0	0	0
sp|Q9NUQ9|FA49B_HUMAN	Q9NUQ9	sp|Q9NUQ9|FA49B_HUMAN	>sp|Q9NUQ9|FA49B_HUMAN Protein FAM49B OS=Homo sapiens GN=FAM49B PE=1 SV=1	FAM49B	FAM49B	51571	7	1615.81	1643.75	1992.28	1829.26	1772.98	1821.75	1653.99	1576.48	1691.03	1581.92	1.30357e-08	6.01076e-09	1.4371e-09	6.9737e-08	2.27388e-08	7.30091e-09	1.72097e-09	9.953e-09	1.8377e-08	4.27119e-08	5	5	1770.82	1665.03	152.185	100.133	0.0850586	0.0591579	3.24691	3.22081	0.0368739	0.0256695	-0.0867095	-0.791915	-1.23301	0.320384	0	0	0	0	0	0
sp|Q8TBF8|FA81A_HUMAN	Q8TBF8	sp|Q8TBF8|FA81A_HUMAN	>sp|Q8TBF8|FA81A_HUMAN Protein FAM81A OS=Homo sapiens GN=FAM81A PE=2 SV=3	FAM81A	FAM81A	145773	2	336.591	247.518	304.157	354.017	369.009	391.208	296.798	320.114	355.147	314.445	1.46656e-07	2.47016e-08	1.23035e-07	7.60973e-08	1.84911e-08	1.50874e-07	1.19108e-07	1.9311e-08	2.3775e-07	2.90988e-07	5	5	322.258	335.542	48.2528	37.6403	0.16037	0.110048	2.50397	2.52363	0.069206	0.0476493	0.0652807	0.344974	0.569858	0.660021	0	1	0	0	0	0
sp|Q8IXS8|F126B_HUMAN	Q8IXS8	sp|Q8IXS8|F126B_HUMAN	>sp|Q8IXS8|F126B_HUMAN Protein FAM126B OS=Homo sapiens GN=FAM126B PE=1 SV=1	FAM126B	FAM126B	285172	3	441.476	486.157	464.462	474.545	569.334	400.908	393.584	411.519	427.887	410.828	1.71487e-08	3.02611e-08	6.88629e-07	1.91687e-08	1.27843e-07	2.34142e-07	3.37916e-08	4.98747e-07	5.01425e-08	2.88559e-09	5	5	487.195	408.945	48.7721	12.9376	0.0962591	0.0315103	2.68606	2.61149	0.0417085	0.0136814	-0.247695	-1.5218	-3.57649	0.0115084	0	0	0	0	0	0
sp|Q86XD5|F131B_HUMAN	Q86XD5	sp|Q86XD5|F131B_HUMAN	>sp|Q86XD5|F131B_HUMAN Protein FAM131B OS=Homo sapiens GN=FAM131B PE=1 SV=3	FAM131B	FAM131B	9715	1	99.0323	66.9438	90.1584	48.7361	97.4162	35.3734	60.5781	68.1801	69.5964	37.4797	1.49886e-05	5.20085e-08	2.80935e-05	0.0294757	1.49377e-06	0.000351092	5.00493e-06	0.004164	1.65362e-06	0.000106413	5	5	80.4574	54.2415	21.8837	16.6371	0.31213	0.339899	1.8906	1.71621	0.132418	0.1436	-0.579306	-1.09409	-2.29774	0.0746035	0	0	0	0	0	0
sp|A8MVW0|F1712_HUMAN	A8MVW0	sp|A8MVW0|F1712_HUMAN	>sp|A8MVW0|F1712_HUMAN Protein FAM171A2 OS=Homo sapiens GN=FAM171A2 PE=1 SV=1	FAM171A2	FAM171A2	284069	1	113.444	122.89	119.118	95.2301	120.065	123.336	124.413	137.315	136.304	147.034	2.26748e-09	4.39921e-06	3.21531e-09	7.3034e-06	1.83565e-08	6.11038e-06	1.19567e-06	3.0916e-06	6.17926e-06	1.27416e-07	5	5	114.15	133.68	11.119	9.89065	0.10348	0.0739026	2.05569	2.12512	0.0448211	0.0320518	0.23063	1.33901	2.83968	0.0332442	0	1	0	0	0	0
sp|Q6P995|F171B_HUMAN	Q6P995	sp|Q6P995|F171B_HUMAN	>sp|Q6P995|F171B_HUMAN Protein FAM171B OS=Homo sapiens GN=FAM171B PE=2 SV=3	FAM171B	FAM171B	165215	1	63.5922	97.7277	86.4803	80.4768	80.0665	42.5134	45.4495	36.0603	66.308	43.1419	6.39989e-06	0.000524921	9.73277e-06	1.49998e-07	2.10269e-06	0.0170321	0.00871825	0.000735721	0.00170423	0.105176	5	5	81.6687	46.6946	12.3672	11.5046	0.157685	0.228304	1.90789	1.65991	0.0680617	0.0978944	-0.823779	-1.62111	-5.23833	0.00125597	-1	0	0	0	0	0
tr|G3V583|G3V583_HUMAN	G3V583	tr|G3V583|G3V583_HUMAN	>tr|G3V583|G3V583_HUMAN Isoform of Q8N128, Protein FAM177A1 (Fragment) OS=Homo sapiens GN=FAM177A1 PE=1 SV=1	FAM177A1	FAM177A1	283635	2	286.595	254.83	258.991	300.183	274.952	123.738	147.7	125.137	154.287	178.966	3.08311e-06	8.6637e-06	5.35715e-06	5.12352e-06	5.20671e-06	0.00128821	0.00401189	0.00383314	0.00138076	0.00108918	5	5	275.11	145.965	18.9188	22.8537	0.068586	0.155271	2.43869	2.16007	0.0297516	0.067032	-0.925542	-1.80021	-9.07765	3.23669e-05	-1	0	0	0	0	0
sp|Q9BRX8-2|F213A_HUMAN	Q9BRX8-2	sp|Q9BRX8-2|F213A_HUMAN	>sp|Q9BRX8-2|F213A_HUMAN Isoform of Q9BRX8, Isoform 2 of Redox-regulatory protein FAM213A OS=Homo sapiens GN=FAM213A	FAM213A	FAM213A	84293	1	542.487	496.106	518.125	570.401	590.933	819.247	604.443	588.317	637.409	819.91	2.41082e-07	5.1265e-08	6.53561e-10	3.5359e-08	7.78796e-09	7.93651e-08	1.24809e-08	2.54708e-08	4.40698e-09	1.57514e-07	5	5	543.61	693.865	38.2902	116.116	0.0706806	0.16568	2.73442	2.83651	0.030658	0.0714671	0.339135	1.36633	3.1651	0.0209684	0	1	0	0	0	0
sp|Q9Y4F1|FARP1_HUMAN	Q9Y4F1	sp|Q9Y4F1|FARP1_HUMAN	>sp|Q9Y4F1|FARP1_HUMAN FERM, RhoGEF and pleckstrin domain-containing protein 1 OS=Homo sapiens GN=FARP1 PE=1 SV=1	FARP1	FARP1	10160	2	383.526	384.478	381.159	408.422	407	416.816	402.434	388.689	375.153	440.745	1.44893e-06	3.74328e-09	3.91522e-09	2.57645e-09	5.58317e-09	7.54221e-06	9.52444e-08	1.08259e-07	2.16286e-06	1.53018e-07	5	5	392.917	404.767	13.5682	25.3993	0.0343484	0.0624071	2.5941	2.60653	0.0149129	0.0270767	0.0412985	0.574908	0.727681	0.567064	0	1	0	0	0	0
sp|Q9Y285|SYFA_HUMAN	Q9Y285	sp|Q9Y285|SYFA_HUMAN	>sp|Q9Y285|SYFA_HUMAN Phenylalanine--tRNA ligase alpha subunit OS=Homo sapiens GN=FARSA PE=1 SV=3	FARSA	FARSA	2193	1	68.7097	73.8591	79.7668	90.2835	62.5583	39.1145	49.6962	54.3543	52.7078	64.5018	9.77438e-07	1.38928e-07	2.05985e-06	1.49361e-06	9.90984e-06	0.000302199	0.00685155	0.000531141	0.0749026	0.013284	5	5	75.0355	52.0749	10.6298	9.13308	0.140986	0.182498	1.87183	1.71107	0.0609284	0.0786097	-0.534031	-1.49422	-4.01213	0.00625248	0	0	0	0	0	0
tr|A0A0U1RQF0|A0A0U1RQF0_HUMAN	A0A0U1RQF0	tr|A0A0U1RQF0|A0A0U1RQF0_HUMAN	>tr|A0A0U1RQF0|A0A0U1RQF0_HUMAN Isoform of P49327, Fatty acid synthase OS=Homo sapiens GN=FASN PE=4 SV=1	FASN	FASN	2194	3	597.832	631.237	651.424	698.834	671.416	687.671	697.373	624.578	707.518	722.926	4.29989e-09	5.00039e-08	4.10887e-09	3.23262e-09	4.63883e-09	2.00657e-08	8.04293e-09	1.74826e-07	1.91001e-08	9.33016e-09	5	5	650.149	688.013	38.467	37.786	0.0595372	0.0565334	2.8124	2.83705	0.0258338	0.0245326	0.0818938	0.91061	1.34093	0.279631	0	1	0	0	0	0
sp|P62861|RS30_HUMAN	P62861	sp|P62861|RS30_HUMAN	>sp|P62861|RS30_HUMAN Isoform of P35544, 40S ribosomal protein S30 OS=Homo sapiens GN=FAU PE=1 SV=1	FAU	FAU	2197	1	57.485	126.181	145.303	112.161	124.729	118.021	146.499	136.487	174.272	168.928	0.00204017	8.97859e-06	5.42267e-08	9.47042e-05	5.83104e-06	2.13042e-07	5.12863e-10	2.1418e-06	5.19122e-09	2.74224e-09	5	5	113.172	148.841	33.3064	23.2284	0.377185	0.160707	2.03373	2.16836	0.158393	0.0693499	0.447252	0.994631	1.9968	0.114023	0	1	0	0	0	0
sp|Q8N461|FXL16_HUMAN	Q8N461	sp|Q8N461|FXL16_HUMAN	>sp|Q8N461|FXL16_HUMAN F-box/LRR-repeat protein 16 OS=Homo sapiens GN=FBXL16 PE=2 SV=2	FBXL16	FBXL16	146330	4	613.678	698.411	685.803	685.068	608.336	481.083	426.964	443.084	411.207	415.283	4.93765e-07	4.41834e-07	3.05462e-06	5.08794e-07	1.83432e-05	2.17164e-07	1.53973e-07	4.22687e-06	3.57431e-05	2.99609e-08	5	5	658.259	435.524	43.5009	28.3157	0.0669749	0.0635875	2.81763	2.6383	0.0290543	0.0275879	-0.595706	-1.82585	-9.1111	3.17513e-05	-1	0	0	0	0	0
sp|Q96IG2|FXL20_HUMAN	Q96IG2	sp|Q96IG2|FXL20_HUMAN	>sp|Q96IG2|FXL20_HUMAN F-box/LRR-repeat protein 20 OS=Homo sapiens GN=FBXL20 PE=1 SV=2	FBXL20	FBXL20	84961	1	76.4441	81.7723	55.4233	83.6494	59.9003	77.9383	65.4811	79.3626	70.4038	70.2134	2.64248e-07	1.36251e-06	8.22336e-06	9.66223e-07	7.42527e-05	0.0012182	0.00165701	3.9742e-06	2.68009e-08	6.25802e-06	5	5	71.4379	72.6798	12.9476	5.81802	0.190263	0.0802342	1.84791	1.8603	0.0818965	0.0347894	0.0411681	0.207661	0.341718	0.797505	0	1	0	0	0	0
sp|Q9UK22|FBX2_HUMAN	Q9UK22	sp|Q9UK22|FBX2_HUMAN	>sp|Q9UK22|FBX2_HUMAN F-box only protein 2 OS=Homo sapiens GN=FBXO2 PE=1 SV=2	FBXO2	FBXO2	26232	1	117.895	172.013	159.696	167.011	160.438	107.159	154.153	158.442	143.628	128.363	5.23914e-09	7.05954e-07	2.79165e-10	2.60588e-07	2.17217e-09	6.04945e-08	3.91207e-09	1.53111e-08	3.48038e-09	4.86131e-08	5	5	155.411	138.349	21.5712	20.9397	0.153523	0.160617	2.18768	2.13671	0.0662863	0.0693113	-0.169334	-0.735008	-1.31463	0.288306	0	0	0	0	0	0
sp|Q8TF61|FBX41_HUMAN	Q8TF61	sp|Q8TF61|FBX41_HUMAN	>sp|Q8TF61|FBX41_HUMAN F-box only protein 41 OS=Homo sapiens GN=FBXO41 PE=2 SV=5	FBXO41	FBXO41	150726	4	832.528	821.713	793.278	835.535	791.592	842.834	857.704	875.758	904.314	892.339	9.99646e-07	4.89816e-08	7.38228e-09	8.8095e-08	4.39299e-07	4.66577e-08	1.57237e-07	2.89729e-08	1.09826e-09	2.58851e-08	5	5	814.929	874.59	21.1763	24.9673	0.0260702	0.0285972	2.911	2.94166	0.0113202	0.0124171	0.101852	1.55935	2.20744	0.0848957	0	1	0	0	0	0
sp|P22830|HEMH_HUMAN	P22830	sp|P22830|HEMH_HUMAN	>sp|P22830|HEMH_HUMAN Ferrochelatase, mitochondrial OS=Homo sapiens GN=FECH PE=1 SV=2	FECH	FECH	2235	1	138.884	147.489	143.228	117.857	122.298	80.2746	73.8318	92.5568	65.8128	66.8881	6.32512e-07	7.05949e-07	2.0841e-09	2.29583e-06	8.79654e-09	0.000776231	0.000969682	0.000212352	0.000154783	0.000334482	5	5	133.951	75.8728	13.1193	10.998	0.0998111	0.141433	2.12524	1.87658	0.04324	0.0611197	-0.826045	-1.77313	-7.96208	8.19099e-05	-1	0	0	0	0	0
sp|P07954-2|FUMH_HUMAN	P07954-2	sp|P07954-2|FUMH_HUMAN	>sp|P07954-2|FUMH_HUMAN Isoform of P07954, Isoform Cytoplasmic of Fumarate hydratase, mitochondrial OS=Homo sapiens GN=FH	FH	FH	2271	6	6759.37	6049.29	6829.83	6647.88	6157.32	7033.71	6469.14	6433.41	6370.25	7410.27	1.19932e-08	1.4021e-07	3.52387e-09	4.93012e-09	1.47497e-08	1.63219e-08	5.19236e-09	8.2815e-09	1.43216e-09	2.49586e-09	5	5	6488.74	6743.36	359.812	458.133	0.0560348	0.0668432	3.81162	3.82809	0.0243166	0.0289973	0.054724	0.617421	0.865904	0.490876	0	1	0	0	0	0
sp|Q13642-1|FHL1_HUMAN	Q13642-1	sp|Q13642-1|FHL1_HUMAN	>sp|Q13642-1|FHL1_HUMAN Isoform of Q13642, Isoform 1 of Four and a half LIM domains protein 1 OS=Homo sapiens GN=FHL1	FHL1	FHL1	2273	1	122.601	122.27	152.744	121.079	157.908	104.013	110.74	103.699	135.349	88.2165	6.1219e-08	2.76211e-05	2.0678e-06	5.56942e-08	0.000265264	0.000102643	0.00185445	7.089e-05	7.03887e-06	4.36468e-05	5	5	135.32	108.403	18.3623	17.1789	0.133476	0.155368	2.12825	2.03083	0.0577122	0.0670733	-0.323609	-1.24566	-2.69941	0.0411822	0	0	0	0	0	0
sp|O43427-2|FIBP_HUMAN	O43427-2	sp|O43427-2|FIBP_HUMAN	>sp|O43427-2|FIBP_HUMAN Isoform of O43427, Isoform Short of Acidic fibroblast growth factor intracellular-binding protein OS=Homo sapiens GN=FIBP	FIBP	FIBP	9158	2	217.137	189.133	156.944	190.841	168.668	163.091	155.085	175.676	176.529	146.608	2.24407e-05	2.697e-05	1.68454e-05	0.272419	5.64823e-06	3.31356e-05	4.968e-05	9.67061e-08	3.33137e-06	5.87031e-05	5	5	184.544	163.398	23.113	12.9834	0.12531	0.0802503	2.26339	2.21214	0.0542098	0.0347963	-0.170258	-1.01023	-1.85745	0.139898	0	0	0	0	0	0
sp|Q9Y3D6|FIS1_HUMAN	Q9Y3D6	sp|Q9Y3D6|FIS1_HUMAN	>sp|Q9Y3D6|FIS1_HUMAN Mitochondrial fission 1 protein OS=Homo sapiens GN=FIS1 PE=1 SV=2	FIS1	FIS1	51024	1	443.184	308.232	316.501	345.609	371.8	327.261	343.721	368.306	338.125	326.176	1.15347e-06	4.70799e-09	8.09047e-11	3.6607e-07	5.25396e-08	1.64818e-08	1.71451e-07	3.98195e-09	1.61429e-07	2.56157e-10	5	5	357.065	340.718	54.3023	17.0981	0.146701	0.0493218	2.54895	2.53197	0.0633725	0.0214072	-0.0564009	-0.373293	-0.596879	0.641603	0	0	0	0	0	0
sp|P62942|FKB1A_HUMAN	P62942	sp|P62942|FKB1A_HUMAN	>sp|P62942|FKB1A_HUMAN Peptidyl-prolyl cis-trans isomerase FKBP1A OS=Homo sapiens GN=FKBP1A PE=1 SV=2	FKBP1A	FKBP1A	2280	2	1125.39	1148.79	1063.08	1348.45	859.136	1865.63	1464.09	1205.79	1593.04	1880.37	1.17514e-08	6.58639e-09	3.55569e-10	3.52472e-08	2.90104e-08	2.0301e-08	3.63024e-09	5.55223e-09	1.94094e-08	9.68217e-09	5	5	1108.97	1601.79	175.875	284.197	0.163945	0.186548	3.0404	3.19883	0.0707287	0.0803247	0.52628	1.44245	3.69815	0.00961923	0	1	0	0	0	0
sp|P68106|FKB1B_HUMAN	P68106	sp|P68106|FKB1B_HUMAN	>sp|P68106|FKB1B_HUMAN Peptidyl-prolyl cis-trans isomerase FKBP1B OS=Homo sapiens GN=FKBP1B PE=1 SV=2	FKBP1B	FKBP1B	2281	1	223.192	277.879	223.963	201.266	166.15	210.218	208.479	223.885	199.938	217.771	6.04326e-08	7.92328e-07	3.07997e-09	3.06619e-07	6.86837e-06	2.46683e-05	9.77386e-06	6.77069e-05	2.58267e-05	1.4853e-05	5	5	218.49	212.058	40.6672	9.15969	0.188492	0.0432597	2.3334	2.32613	0.0811476	0.0187787	-0.0241354	-0.130533	-0.212298	0.879373	0	0	0	0	0	0
sp|P26885|FKBP2_HUMAN	P26885	sp|P26885|FKBP2_HUMAN	>sp|P26885|FKBP2_HUMAN Peptidyl-prolyl cis-trans isomerase FKBP2 OS=Homo sapiens GN=FKBP2 PE=1 SV=2	FKBP2	FKBP2	2286	2	761.235	674.766	682.144	622.323	644.635	697.119	629.381	573.013	627.211	699.424	3.20678e-08	2.20357e-07	4.70703e-08	4.17624e-08	1.21757e-07	5.05767e-08	2.47928e-08	1.379e-07	6.67929e-09	1.5445e-07	5	5	677.021	645.23	52.8301	53.4337	0.0764082	0.0837508	2.82958	2.80851	0.0331354	0.036309	-0.0699855	-0.608884	-0.936015	0.453474	0	0	0	0	0	0
sp|Q00688|FKBP3_HUMAN	Q00688	sp|Q00688|FKBP3_HUMAN	>sp|Q00688|FKBP3_HUMAN Peptidyl-prolyl cis-trans isomerase FKBP3 OS=Homo sapiens GN=FKBP3 PE=1 SV=1	FKBP3	FKBP3	2287	3	486.033	460.426	474.438	516.311	551.406	409.471	410.157	452.733	454.566	444.772	2.23231e-07	7.81808e-06	4.35792e-05	1.25589e-07	6.02278e-07	7.95557e-06	4.37121e-08	1.81797e-06	1.33387e-07	3.16842e-05	5	5	497.723	434.34	36.3913	22.6906	0.0721029	0.0527316	2.69608	2.63735	0.0312733	0.0228852	-0.195089	-1.45664	-3.04419	0.024728	0	0	0	0	0	0
sp|Q14318|FKBP8_HUMAN	Q14318	sp|Q14318|FKBP8_HUMAN	>sp|Q14318|FKBP8_HUMAN Peptidyl-prolyl cis-trans isomerase FKBP8 OS=Homo sapiens GN=FKBP8 PE=1 SV=2	FKBP8	FKBP8	23770	2	359.639	315.213	377.136	363.982	308.894	361.105	373.306	333.919	390.31	416.095	4.0308e-09	6.42799e-07	1.05266e-06	8.22802e-05	4.39274e-08	2.26313e-07	1.10343e-08	8.39624e-07	4.64931e-09	1.54541e-09	5	5	344.973	374.947	30.815	30.8495	0.0908034	0.0827276	2.53637	2.57279	0.0393545	0.0358669	0.120972	0.902414	1.52774	0.219079	0	1	0	0	0	0
sp|O75955|FLOT1_HUMAN	O75955	sp|O75955|FLOT1_HUMAN	>sp|O75955|FLOT1_HUMAN Flotillin-1 OS=Homo sapiens GN=FLOT1 PE=1 SV=3	FLOT1	FLOT1	10211	9	2040.11	2437.6	2431.52	2216.37	2725.32	2712.99	2949.33	3009.91	3376.62	2677.91	2.75222e-08	1.44578e-07	3.83914e-09	1.0813e-08	1.11185e-07	7.2623e-08	7.57723e-09	1.4089e-08	6.73603e-08	1.35541e-08	5	5	2370.18	2945.35	258.38	280.931	0.109656	0.0936061	3.37271	3.4676	0.0474807	0.040564	0.315217	1.45822	3.52489	0.0124564	0	1	0	0	0	0
sp|Q14254|FLOT2_HUMAN	Q14254	sp|Q14254|FLOT2_HUMAN	>sp|Q14254|FLOT2_HUMAN Flotillin-2 OS=Homo sapiens GN=FLOT2 PE=1 SV=2	FLOT2	FLOT2	2319	19	6904.49	6590.12	6121.58	6296.64	6753.5	5715.94	5631.6	5346.33	5988.53	5554.83	1.57686e-08	9.24267e-08	4.3218e-09	5.24542e-08	2.45377e-08	4.43188e-08	1.75065e-08	1.66024e-08	2.5566e-08	2.14662e-08	5	5	6533.27	5647.44	322.11	234.803	0.0495807	0.0414471	3.81471	3.75155	0.0215194	0.0179925	-0.209787	-1.65417	-3.86428	0.00762108	0	0	0	0	0	0
sp|Q9P0K9|FRS1L_HUMAN	Q9P0K9	sp|Q9P0K9|FRS1L_HUMAN	>sp|Q9P0K9|FRS1L_HUMAN DOMON domain-containing protein FRRS1L OS=Homo sapiens GN=FRRS1L PE=2 SV=2	FRRS1L	FRRS1L	23732	1	186.09	181.671	177.86	116.764	153.182	103.561	121.032	132.305	103.36	101.939	4.82541e-07	3.14761e-05	6.07202e-07	0.000648522	8.75102e-07	6.8631e-08	8.68193e-07	1.61397e-06	2.13851e-06	6.13415e-07	5	5	163.113	112.439	28.8819	13.6015	0.196245	0.117881	2.20632	2.04847	0.0844244	0.0510186	-0.524362	-1.48849	-3.96892	0.00660717	0	0	0	0	0	0
sp|Q16658|FSCN1_HUMAN	Q16658	sp|Q16658|FSCN1_HUMAN	>sp|Q16658|FSCN1_HUMAN Fascin OS=Homo sapiens GN=FSCN1 PE=1 SV=3	FSCN1	FSCN1	6624	3	1349.32	1313.28	1364.88	1294	1482.68	1045.28	851.146	1445.05	1171.72	790.241	4.91974e-09	5.39556e-09	1.40146e-10	5.0781e-09	9.67994e-09	1.04878e-08	1.30442e-08	1.15771e-09	1.48727e-08	1.38549e-07	5	5	1360.83	1060.69	73.695	263.32	0.053022	0.24756	3.13331	3.01514	0.023011	0.105919	-0.392551	-1.23872	-2.72654	0.0395926	0	0	0	0	0	0
sp|P35637-2|FUS_HUMAN	P35637-2	sp|P35637-2|FUS_HUMAN	>sp|P35637-2|FUS_HUMAN Isoform of P35637, Isoform Short of RNA-binding protein FUS OS=Homo sapiens GN=FUS	FUS	FUS	2521	2	248.192	148.33	186.147	189.27	244.248	313.195	331.667	228.745	270.32	316.051	1.73507e-05	0.0357623	0.00311411	1.65462e-06	0.000401247	2.56793e-09	6.98186e-10	0.00842229	1.25829e-08	8.32743e-08	5	5	203.237	291.995	42.4405	42.0486	0.216999	0.153002	2.30016	2.4615	0.0931594	0.0660639	0.535971	1.41356	3.54733	0.0120429	0	1	0	0	0	0
sp|P06241|FYN_HUMAN	P06241	sp|P06241|FYN_HUMAN	>sp|P06241|FYN_HUMAN Tyrosine-protein kinase Fyn OS=Homo sapiens GN=FYN PE=1 SV=3	FYN	FYN	2534	4	638.418	656.304	618.207	511.524	686.129	599.606	656.282	582.981	701.573	663.408	2.80934e-06	2.43478e-07	3.46552e-08	6.98014e-05	7.7852e-05	4.1957e-07	5.68496e-07	2.31038e-06	1.87596e-07	2.54635e-08	5	5	622.116	640.77	66.6673	48.6931	0.113669	0.0764504	2.79172	2.80569	0.0492075	0.0331536	0.0464057	0.347194	0.540122	0.677891	0	1	0	0	0	0
sp|P11413|G6PD_HUMAN	P11413	sp|P11413|G6PD_HUMAN	>sp|P11413|G6PD_HUMAN Glucose-6-phosphate 1-dehydrogenase OS=Homo sapiens GN=G6PD PE=1 SV=4	G6PD	G6PD	2539	1	155.309	114.385	154.589	201.487	127.232	175.955	183.909	187.329	174.867	177.676	1.65092e-07	1.40072e-05	4.29493e-08	5.92357e-07	7.78549e-06	1.72005e-09	2.93557e-08	8.54813e-10	2.26424e-08	2.78024e-09	5	5	150.601	179.947	33.4857	5.41011	0.219742	0.0298993	2.16952	2.25499	0.0943097	0.0129822	0.283929	1.09821	2.219	0.0834958	0	1	0	0	0	0
sp|P60520|GBRL2_HUMAN	P60520	sp|P60520|GBRL2_HUMAN	>sp|P60520|GBRL2_HUMAN Gamma-aminobutyric acid receptor-associated protein-like 2 OS=Homo sapiens GN=GABARAPL2 PE=1 SV=1	GABARAPL2	GABARAPL2	11345	1	177.634	192.273	184.666	211.026	181.025	51.205	55.587	130.164	82.964	53.6219	4.45666e-06	9.70436e-07	6.93677e-06	3.72547e-09	7.12803e-09	0.00471483	0.00517044	3.95385e-05	6.87176e-07	0.00555638	5	5	189.325	74.7083	13.2938	33.5639	0.0684354	0.414965	2.27638	1.8434	0.0296864	0.173108	-1.43833	-1.68812	-6.32514	0.000382623	-1	0	0	0	0	0
sp|Q9UBS5-4|GABR1_HUMAN	Q9UBS5-4	sp|Q9UBS5-4|GABR1_HUMAN	>sp|Q9UBS5-4|GABR1_HUMAN Isoform of Q9UBS5, Isoform 1D of Gamma-aminobutyric acid type B receptor subunit 1 OS=Homo sapiens GN=GABBR1	GABBR1	GABBR1	2550	7	1987.39	1837.16	1934.25	1764.26	1904.38	1517.58	1412.01	1497.09	1590.76	1638.14	1.07668e-08	1.64366e-07	4.96162e-09	2.04254e-07	5.9234e-07	1.46474e-07	3.64703e-08	1.79863e-08	7.2056e-08	2.21473e-08	5	5	1885.49	1531.12	86.82	87.3754	0.0464168	0.0574023	3.27505	3.18444	0.0201477	0.024909	-0.301012	-1.73205	-5.21168	0.00130235	-1	0	0	0	0	0
sp|O75899|GABR2_HUMAN	O75899	sp|O75899|GABR2_HUMAN	>sp|O75899|GABR2_HUMAN Gamma-aminobutyric acid type B receptor subunit 2 OS=Homo sapiens GN=GABBR2 PE=1 SV=1	GABBR2	GABBR2	9568	5	1548.25	1642.39	1768.08	1478.83	1748.58	1125.49	1183.61	1274.83	1339.2	1193.34	3.97953e-08	2.32832e-08	7.73744e-10	7.36163e-09	3.85651e-09	2.79717e-08	3.94719e-09	8.58049e-09	4.38416e-09	6.30728e-09	5	5	1637.23	1223.29	125.057	83.8541	0.0770894	0.0681321	3.21308	3.08672	0.0334299	0.0295552	-0.419767	-1.7324	-5.99623	0.000521486	-1	0	0	0	0	0
sp|P14867|GBRA1_HUMAN	P14867	sp|P14867|GBRA1_HUMAN	>sp|P14867|GBRA1_HUMAN Gamma-aminobutyric acid receptor subunit alpha-1 OS=Homo sapiens GN=GABRA1 PE=1 SV=3	GABRA1	GABRA1	2554	4	1159.15	1022.03	1072.12	1015.67	988.501	625.08	620.817	630.882	728.076	595.885	2.27986e-08	8.85351e-06	2.27838e-08	2.8388e-05	1.53834e-06	1.54803e-05	3.12121e-06	1.68669e-06	7.33679e-05	9.85603e-05	5	5	1051.49	640.148	67.3324	50.9343	0.0626946	0.0765821	3.02111	2.80524	0.0272012	0.0332106	-0.71713	-1.84005	-10.5049	1.24909e-05	-1	0	0	0	0	0
sp|P47869|GBRA2_HUMAN	P47869	sp|P47869|GBRA2_HUMAN	>sp|P47869|GBRA2_HUMAN Gamma-aminobutyric acid receptor subunit alpha-2 OS=Homo sapiens GN=GABRA2 PE=2 SV=2	GABRA2	GABRA2	2555	2	274.924	219.92	261.327	256.999	263.506	553.55	563.979	584.273	709.65	668.326	9.54088e-07	2.10648e-07	1.76639e-05	2.06475e-07	0.000136018	1.50872e-08	4.30743e-08	1.25046e-06	6.3963e-09	1.10658e-08	5	5	255.335	615.955	20.8768	69.1394	0.0857282	0.110516	2.40588	2.78741	0.0371632	0.0478507	1.26744	1.86021	14.5142	1.50323e-06	1	1	0	0	0	0
sp|P34903|GBRA3_HUMAN	P34903	sp|P34903|GBRA3_HUMAN	>sp|P34903|GBRA3_HUMAN Gamma-aminobutyric acid receptor subunit alpha-3 OS=Homo sapiens GN=GABRA3 PE=2 SV=1	GABRA3	GABRA3	2556	2	281.144	233.064	277.677	276.343	313.333	261.015	226.281	192.523	264.554	218.002	4.8019e-05	1.1607e-06	1.78891e-05	3.08829e-05	3.5463e-06	1.39437e-07	0.000117829	0.00120356	1.09258e-05	4.1918e-07	5	5	276.312	232.475	28.575	30.3628	0.106377	0.13315	2.43948	2.36335	0.046069	0.0575723	-0.252882	-1.19973	-2.46901	0.0580443	0	0	0	0	0	0
sp|P48169|GBRA4_HUMAN	P48169	sp|P48169|GBRA4_HUMAN	>sp|P48169|GBRA4_HUMAN Gamma-aminobutyric acid receptor subunit alpha-4 OS=Homo sapiens GN=GABRA4 PE=2 SV=2	GABRA4	GABRA4	2557	1	143.4	142.287	115.112	116.219	119.801	97.2484	90.3004	110.626	90.8148	105.734	4.29785e-05	0.000150944	3.3186e-05	4.22854e-05	4.56149e-06	0.000155797	1.90688e-07	7.62967e-05	3.82233e-05	3.99093e-05	5	5	127.364	98.9447	14.2422	9.031	0.110541	0.0907539	2.10291	1.99396	0.0478618	0.0393331	-0.361938	-1.54035	-4.07304	0.00574855	0	0	0	0	0	0
sp|P31644|GBRA5_HUMAN	P31644	sp|P31644|GBRA5_HUMAN	>sp|P31644|GBRA5_HUMAN Gamma-aminobutyric acid receptor subunit alpha-5 OS=Homo sapiens GN=GABRA5 PE=1 SV=1	GABRA5	GABRA5	2558	2	380.738	372.892	370.187	374.171	319.254	150.1	175.374	207.638	202.289	192.64	6.25048e-08	2.10937e-07	2.41466e-08	4.03599e-05	6.44984e-08	0.00190007	4.63343e-05	1.44604e-06	0.000392734	9.77277e-06	5	5	363.448	185.608	25.0083	23.3378	0.072187	0.132337	2.55957	2.26567	0.0313097	0.0572241	-0.976292	-1.82674	-10.5442	1.23353e-05	-1	0	0	0	0	0
sp|P18505|GBRB1_HUMAN	P18505	sp|P18505|GBRB1_HUMAN	>sp|P18505|GBRB1_HUMAN Gamma-aminobutyric acid receptor subunit beta-1 OS=Homo sapiens GN=GABRB1 PE=2 SV=2	GABRB1	GABRB1	2560	4	998.178	901.917	969.026	799.958	982.898	892.058	1038.08	1058.87	1148.4	1068.13	0.000282865	6.84267e-05	2.26202e-06	0.000295999	3.02062e-06	5.75427e-07	1.07915e-07	1.03696e-06	2.67837e-07	1.03373e-07	5	5	930.395	1041.11	81.6521	93.2509	0.0914918	0.0929212	2.96726	3.01604	0.0396516	0.0402684	0.162044	1.06946	1.95765	0.121074	0	1	0	0	0	0
tr|E7EV50|E7EV50_HUMAN	E7EV50	tr|E7EV50|E7EV50_HUMAN	>tr|E7EV50|E7EV50_HUMAN Isoform of P47870, Gamma-aminobutyric acid receptor subunit beta-2 OS=Homo sapiens GN=GABRB2 PE=1 SV=1	GABRB2	GABRB2	2561	4	1014.11	861.834	955.357	962.432	860.191	621.111	606.671	602.643	661.911	614.048	2.81546e-07	3.59864e-06	2.70101e-06	4.60965e-07	1.0826e-05	2.1959e-05	4.98903e-06	5.1261e-07	3.81306e-05	5.61325e-05	5	5	930.786	621.277	67.6146	23.7908	0.0730201	0.0375717	2.96793	2.79304	0.0316701	0.0163114	-0.580977	-1.83736	-9.51331	2.3983e-05	-1	0	0	0	0	0
sp|P28472-4|GBRB3_HUMAN	P28472-4	sp|P28472-4|GBRB3_HUMAN	>sp|P28472-4|GBRB3_HUMAN Isoform of P28472, Isoform 4 of Gamma-aminobutyric acid receptor subunit beta-3 OS=Homo sapiens GN=GABRB3	GABRB3	GABRB3	2562	4	1297.89	1187.46	1229.84	1099.51	1143.97	743.696	777.706	896.787	920.167	884.801	2.20708e-09	1.32596e-08	3.60124e-10	1.66967e-09	4.87658e-09	3.24269e-09	1.89961e-09	2.11738e-09	1.7316e-09	3.69937e-09	5	5	1191.74	844.631	76.6923	78.5912	0.0641602	0.0951276	3.07546	2.92512	0.0278358	0.0412204	-0.499426	-1.75029	-6.62435	0.000277378	-1	0	0	0	0	0
sp|P18507-2|GBRG2_HUMAN	P18507-2	sp|P18507-2|GBRG2_HUMAN	>sp|P18507-2|GBRG2_HUMAN Isoform of P18507, Isoform 2 of Gamma-aminobutyric acid receptor subunit gamma-2 OS=Homo sapiens GN=GABRG2	GABRG2	GABRG2	2566	3	1288.26	1170.61	1273.58	1145.37	1118.17	720.279	803.744	911.293	951.573	811.676	3.38764e-06	3.73448e-06	2.73356e-07	1.03774e-06	7.79732e-07	1.54682e-06	7.15762e-07	2.15964e-07	2.61604e-07	1.55424e-07	5	5	1199.2	839.713	77.0476	92.1694	0.0639522	0.110815	3.07818	2.92202	0.0277458	0.0479797	-0.518746	-1.73093	-6.35938	0.000372618	-1	0	0	0	0	0
sp|Q99259|DCE1_HUMAN	Q99259	sp|Q99259|DCE1_HUMAN	>sp|Q99259|DCE1_HUMAN Glutamate decarboxylase 1 OS=Homo sapiens GN=GAD1 PE=1 SV=1	GAD1	GAD1	2571	1	101.019	129.204	127.553	130.79	134.459	94.9734	97.1437	94.151	78.5663	77.0045	7.86268e-09	1.41021e-07	1.3441e-10	6.56027e-09	9.01548e-09	1.8334e-08	1.69215e-08	5.342e-08	7.71459e-08	2.78e-07	5	5	124.605	88.3678	13.4301	9.73766	0.116474	0.113078	2.09331	1.94412	0.0504135	0.0489531	-0.495591	-1.62999	-5.03691	0.00161081	-1	0	0	0	0	0
sp|Q05329|DCE2_HUMAN	Q05329	sp|Q05329|DCE2_HUMAN	>sp|Q05329|DCE2_HUMAN Glutamate decarboxylase 2 OS=Homo sapiens GN=GAD2 PE=1 SV=1	GAD2	GAD2	2572	2	356.712	309.959	361.025	360.612	379.232	584.23	591.242	612.778	630.401	644.541	0.00238466	2.14018e-08	1.68457e-05	0.0953503	1.77429e-05	5.64519e-07	2.48896e-09	3.96068e-09	4.68783e-09	8.48765e-09	5	5	353.508	612.638	25.8624	25.4859	0.0761226	0.0415798	2.54742	2.7869	0.0330119	0.0180501	0.795544	1.86098	12.6305	3.8025e-06	1	1	0	0	0	0
sp|O14976-2|GAK_HUMAN	O14976-2	sp|O14976-2|GAK_HUMAN	>sp|O14976-2|GAK_HUMAN Isoform of O14976, Isoform 2 of Cyclin-G-associated kinase OS=Homo sapiens GN=GAK	GAK	GAK	2580	2	226.023	232.24	197.922	168.494	223.944	236.831	211.939	192.465	144.508	195.592	7.3893e-05	4.39816e-05	0.012042	0.104682	2.98585e-06	2.00887e-05	2.68028e-07	4.35832e-05	0.000118758	3.83292e-07	5	5	209.725	196.267	26.5235	33.8563	0.134141	0.184913	2.31866	2.28725	0.0579973	0.0796325	-0.104349	-0.463782	-0.790756	0.532084	0	0	0	0	1	0
sp|Q14697|GANAB_HUMAN	Q14697	sp|Q14697|GANAB_HUMAN	>sp|Q14697|GANAB_HUMAN Neutral alpha-glucosidase AB OS=Homo sapiens GN=GANAB PE=1 SV=3	GANAB	GANAB	23193	1	130.021	145.63	133.71	121.341	118.068	167.773	191.237	156.786	171.182	182.42	6.02894e-06	1.95425e-05	2.32798e-08	3.21119e-08	2.56885e-07	6.81128e-07	1.70476e-05	0.000152141	1.90309e-06	2.89751e-08	5	5	129.754	173.88	10.8985	13.3322	0.0831988	0.0768534	2.11191	2.23923	0.0360705	0.0333279	0.422927	1.70521	5.66007	0.000786303	1	1	0	0	0	0
sp|P04406|G3P_HUMAN	P04406	sp|P04406|G3P_HUMAN	>sp|P04406|G3P_HUMAN Glyceraldehyde-3-phosphate dehydrogenase OS=Homo sapiens GN=GAPDH PE=1 SV=3	GAPDH	GAPDH	2597	10	21509.7	24595.1	23215.6	13323.3	26021.8	16139.8	19495.5	19435.4	17060.3	14492.5	4.98137e-07	2.87159e-07	5.84194e-09	1.06224e-07	3.33901e-07	6.48379e-08	2.04875e-08	1.78938e-07	6.91684e-08	7.73968e-08	5	5	21733.1	17324.7	4988.91	2160.06	0.273362	0.127071	4.32584	4.23591	0.116587	0.0549653	-0.298745	-0.916402	-1.76587	0.158452	0	0	0	0	0	0
tr|F8W9S7|F8W9S7_HUMAN	F8W9S7	tr|F8W9S7|F8W9S7_HUMAN	>tr|F8W9S7|F8W9S7_HUMAN Isoform of Q14C86, GTPase-activating protein and VPS9 domain-containing protein 1 OS=Homo sapiens GN=GAPVD1 PE=1 SV=1	GAPVD1	GAPVD1	26130	1	149.152	135.46	146.25	166.265	129.929	152.392	131.081	117.417	122.249	164.463	0.0069407	0.0425753	0.0563913	0.0437543	0.110295	7.6424e-08	8.95693e-08	0.000487973	3.99985e-05	1.31288e-05	5	5	145.411	137.52	14.0384	20.1613	0.095441	0.145092	2.16101	2.13471	0.0413556	0.0626849	-0.0873623	-0.506246	-0.839896	0.504702	0	0	0	0	0	0
sp|P41250|SYG_HUMAN	P41250	sp|P41250|SYG_HUMAN	>sp|P41250|SYG_HUMAN Glycine--tRNA ligase OS=Homo sapiens GN=GARS PE=1 SV=3	GARS	GARS	2617	2	242.198	301.241	318.895	253.728	318.359	263.729	358.54	304.073	325.864	215.913	0.00234556	8.42596e-05	0.000430007	0.000426611	0.000612274	1.07373e-06	2.71009e-06	6.6074e-06	3.30133e-06	1.29997e-05	5	5	286.884	293.624	36.461	55.4422	0.130884	0.199985	2.4548	2.4612	0.0566008	0.0860021	0.0212418	0.0930498	0.154652	0.91314	0	1	0	0	0	0
sp|O60861|GAS7_HUMAN	O60861	sp|O60861|GAS7_HUMAN	>sp|O60861|GAS7_HUMAN Growth arrest-specific protein 7 OS=Homo sapiens GN=GAS7 PE=1 SV=3	GAS7	GAS7	8522	3	738.097	799.958	814.258	728.807	663.003	557.676	400.368	492.267	475.619	423.937	7.5022e-08	5.6515e-08	2.6544e-10	8.05354e-09	1.72521e-08	2.78831e-09	1.39507e-09	2.9683e-08	2.80115e-08	5.94197e-09	5	5	748.825	469.973	60.7809	61.6132	0.0824567	0.130606	2.87321	2.66912	0.0357498	0.0564816	-0.677984	-1.75289	-7.17896	0.000157217	-1	0	0	0	0	0
sp|O75323|NIPS2_HUMAN	O75323	sp|O75323|NIPS2_HUMAN	>sp|O75323|NIPS2_HUMAN Protein NipSnap homolog 2 OS=Homo sapiens GN=GBAS PE=1 SV=1	GBAS	GBAS	2631	1	596.008	432.027	560.153	531.357	408.651	633.513	618.387	598.998	567.538	602.251	3.09433e-08	4.92652e-09	4.45425e-10	1.64444e-09	2.16601e-09	1.71889e-08	4.83976e-09	1.89213e-09	1.1496e-09	6.87387e-09	5	5	505.639	604.138	81.5859	24.675	0.166599	0.0411988	2.69916	2.78084	0.0718584	0.0178848	0.271339	1.24702	2.63972	0.0449296	0	1	0	0	0	0
tr|E9PGM4|E9PGM4_HUMAN	E9PGM4	tr|E9PGM4|E9PGM4_HUMAN	>tr|E9PGM4|E9PGM4_HUMAN Isoform of Q04446, 1,4-alpha-glucan-branching enzyme OS=Homo sapiens GN=GBE1 PE=1 SV=1	GBE1	GBE1	2632	1	36.6421	60.9565	47.9427	48.9505	42.5739	90.2315	89.3659	103.548	94.3524	75.1112	0.00130692	0.0698156	4.22246e-05	0.000785241	0.00715714	1.01658e-05	3.95016e-05	0.000455551	6.67337e-05	5.01476e-05	5	5	47.4131	90.5217	9.0208	10.2865	0.189596	0.117288	1.66972	1.95443	0.0816148	0.0507637	0.945756	1.74493	7.32812	0.000137393	1	1	0	0	0	0
sp|P23434|GCSH_HUMAN	P23434	sp|P23434|GCSH_HUMAN	>sp|P23434|GCSH_HUMAN Glycine cleavage system H protein, mitochondrial OS=Homo sapiens GN=GCSH PE=1 SV=2	GCSH	GCSH	2653	1	203.048	203	222.05	274.857	181.969	247.037	253.132	267.658	238.035	289.974	3.35673e-08	8.31672e-08	1.51834e-09	5.03514e-08	2.88278e-08	1.14127e-08	6.47984e-09	3.89653e-08	2.32649e-08	1.73073e-09	5	5	216.985	259.167	35.3227	20.3183	0.155654	0.0771107	2.33213	2.41254	0.0671954	0.0334391	0.26711	1.22626	2.56919	0.0500056	0	1	0	0	0	0
sp|Q9Y2T3|GUAD_HUMAN	Q9Y2T3	sp|Q9Y2T3|GUAD_HUMAN	>sp|Q9Y2T3|GUAD_HUMAN Guanine deaminase OS=Homo sapiens GN=GDA PE=1 SV=1	GDA	GDA	9615	4	1495.47	1258.97	1428.89	1298.38	1534.02	1468.69	1420.17	1666.47	1535.66	1113.34	1.6552e-06	2.28275e-06	1.02549e-07	7.40723e-06	9.16175e-07	0.000271037	7.94442e-08	1.88197e-07	5.19985e-08	1.37745e-05	5	5	1403.14	1440.87	120.496	205.159	0.0868758	0.152458	3.1458	3.1548	0.0376588	0.0658315	0.0298791	0.177117	0.284867	0.83375	0	1	0	0	0	0
sp|Q8TB36-2|GDAP1_HUMAN	Q8TB36-2	sp|Q8TB36-2|GDAP1_HUMAN	>sp|Q8TB36-2|GDAP1_HUMAN Isoform of Q8TB36, Isoform 2 of Ganglioside-induced differentiation-associated protein 1 OS=Homo sapiens GN=GDAP1	GDAP1	GDAP1	54332	3	1353.55	1034.69	1185.21	1166.36	1209.59	2127.63	1929.26	1821.04	1873.67	2090.31	2.16135e-08	1.86083e-07	4.80169e-08	1.37649e-08	3.46968e-08	1.06947e-07	3.30946e-08	1.87275e-08	9.37055e-09	1.42278e-08	5	5	1189.88	1968.38	113.835	134.569	0.0960789	0.0681504	3.07391	3.2933	0.0416307	0.0295631	0.728803	1.82014	9.48821	2.3983e-05	1	1	0	0	0	0
sp|Q96MZ0|GD1L1_HUMAN	Q96MZ0	sp|Q96MZ0|GD1L1_HUMAN	>sp|Q96MZ0|GD1L1_HUMAN Ganglioside-induced differentiation-associated protein 1-like 1 OS=Homo sapiens GN=GDAP1L1 PE=2 SV=2	GDAP1L1	GDAP1L1	78997	4	1095.71	872.398	1165.2	1043.39	1033.48	1771.4	1511.85	1515.5	1406.72	1721.4	6.84348e-08	5.73532e-06	3.13542e-07	9.36161e-06	8.804e-07	1.7137e-07	1.92389e-08	2.69334e-08	2.63631e-07	1.34914e-07	5	5	1042.04	1585.37	108.285	154.366	0.108182	0.0971777	3.01591	3.19849	0.0468465	0.0421046	0.606526	1.73901	6.73644	0.000246174	1	1	0	0	0	0
sp|Q9NZC3|GDE1_HUMAN	Q9NZC3	sp|Q9NZC3|GDE1_HUMAN	>sp|Q9NZC3|GDE1_HUMAN Glycerophosphodiester phosphodiesterase 1 OS=Homo sapiens GN=GDE1 PE=1 SV=1	GDE1	GDE1	51573	1	110.874	140.758	113.407	131.192	97.5054	14.3394	24.8618	40.8671	22.5423	18.7801	1.29074e-05	4.34936e-08	1.31765e-07	3.88624e-07	1.97991e-07	0.436169	0.472104	0.00295446	0.212444	0.504014	5	5	118.747	24.2781	17.1834	10.094	0.145822	0.402596	2.07098	1.35803	0.0629967	0.168322	-2.36836	-1.80769	-10.1855	1.49881e-05	-1	0	0	0	0	0
sp|P31150|GDIA_HUMAN	P31150	sp|P31150|GDIA_HUMAN	>sp|P31150|GDIA_HUMAN Rab GDP dissociation inhibitor alpha OS=Homo sapiens GN=GDI1 PE=1 SV=2	GDI1	GDI1	2664	8	4114.62	4591.73	5029.75	5010.95	4655.75	6540.35	6173.02	5741.81	5594.89	5783.11	1.17682e-07	3.08498e-07	1.13066e-08	7.15541e-09	5.4921e-08	2.41136e-08	4.63668e-09	3.71599e-08	7.62408e-09	1.89875e-07	5	5	4680.56	5966.64	374.125	385.41	0.0819871	0.0636274	3.66915	3.77502	0.0355469	0.0276051	0.351685	1.67108	4.99521	0.00168661	1	1	0	0	0	0
sp|P50395|GDIB_HUMAN	P50395	sp|P50395|GDIB_HUMAN	>sp|P50395|GDIB_HUMAN Rab GDP dissociation inhibitor beta OS=Homo sapiens GN=GDI2 PE=1 SV=2	GDI2	GDI2	2665	6	1509.84	1375.55	1579.58	1425.98	1452.72	1598.21	1601.13	1550.01	1593.92	1508.86	3.05502e-08	3.16468e-08	3.38459e-10	1.40464e-08	2.61319e-08	3.63049e-08	1.60861e-07	2.42296e-07	6.7467e-08	6.2718e-08	5	5	1468.73	1570.43	78.6524	40.2317	0.0532798	0.0258571	3.16645	3.1959	0.0231227	0.0112277	0.0978406	1.27382	1.86822	0.138065	0	1	0	0	0	0
sp|P14136|GFAP_HUMAN	P14136	sp|P14136|GFAP_HUMAN	>sp|P14136|GFAP_HUMAN Glial fibrillary acidic protein OS=Homo sapiens GN=GFAP PE=1 SV=1	GFAP	GFAP	2670	6	3700.39	2500.38	3204.45	3665.4	4055.21	9299.79	8350.48	8778.26	8685.46	10399.7	9.18609e-08	1.19303e-07	3.55955e-09	8.21796e-09	2.01854e-08	9.93768e-09	1.00328e-08	1.10157e-08	4.01009e-09	6.47372e-09	5	5	3425.17	9102.75	598.826	800.989	0.18986	0.085475	3.52883	3.95788	0.0817265	0.0370538	1.42528	1.83427	11.7425	5.54987e-06	1	1	0	0	0	0
sp|O00451-3|GFRA2_HUMAN	O00451-3	sp|O00451-3|GFRA2_HUMAN	>sp|O00451-3|GFRA2_HUMAN Isoform of O00451, Isoform 3 of GDNF family receptor alpha-2 OS=Homo sapiens GN=GFRA2	GFRA2	GFRA2	2675	1	103.91	131.632	107.113	104.136	81.6191	48.0785	33.6095	39.1811	41.9872	38.6844	4.02031e-06	1.82002e-06	3.34354e-06	5.51273e-08	2.06038e-05	0.00375353	0.0856544	0.0939914	0.022318	0.0382854	5	5	105.682	40.3081	17.7484	5.29097	0.170788	0.130974	2.01905	1.60243	0.0736399	0.0566395	-1.38399	-1.82611	-11.0555	8.63657e-06	-1	0	0	0	0	0
sp|Q9NZ52|GGA3_HUMAN	Q9NZ52	sp|Q9NZ52|GGA3_HUMAN	>sp|Q9NZ52|GGA3_HUMAN ADP-ribosylation factor-binding protein GGA3 OS=Homo sapiens GN=GGA3 PE=1 SV=1	GGA3	GGA3	23163	1	77.2637	85.3303	79.9313	94.5947	68.9044	97.0242	113.789	112.282	98.7935	95.6713	2.39059e-06	4.34921e-05	4.53424e-06	4.67488e-07	3.22104e-08	7.40205e-07	2.21048e-07	2.93533e-07	2.91302e-06	9.89121e-06	5	5	81.2049	103.512	9.54936	8.7801	0.11799	0.0839699	1.90718	2.01376	0.0510653	0.0364036	0.354046	1.52205	3.94589	0.00680485	0	1	0	0	0	0
sp|Q9UJ14|GGT7_HUMAN	Q9UJ14	sp|Q9UJ14|GGT7_HUMAN	>sp|Q9UJ14|GGT7_HUMAN Gamma-glutamyltransferase 7 OS=Homo sapiens GN=GGT7 PE=1 SV=2	GGT7	GGT7	2686	3	502.666	483.168	474.12	492.187	460.803	502.945	516.751	542.496	464.667	516.714	1.73364e-08	2.08852e-07	6.55838e-10	4.28069e-08	7.26769e-09	3.43129e-08	5.45179e-10	5.02439e-08	2.02722e-09	8.26388e-09	5	5	482.589	508.715	16.1391	28.475	0.0335395	0.0569389	2.68338	2.70592	0.0145619	0.0247082	0.0748624	1.0012	1.3656	0.27087	0	1	0	0	0	0
sp|Q9H3K2|GHITM_HUMAN	Q9H3K2	sp|Q9H3K2|GHITM_HUMAN	>sp|Q9H3K2|GHITM_HUMAN Growth hormone-inducible transmembrane protein OS=Homo sapiens GN=GHITM PE=1 SV=2	GHITM	GHITM	27069	1	278.704	268.125	286.81	248.84	345.894	222.859	235.228	226.78	278.055	226.859	7.52562e-07	2.79181e-08	0.000174156	0.000177875	3.18638e-07	7.82425e-06	3.36057e-05	4.81604e-07	3.01335e-07	3.38528e-07	5	5	285.675	237.956	36.5412	22.8657	0.123037	0.0913185	2.45319	2.375	0.0532335	0.0395768	-0.259726	-1.29349	-2.76734	0.0372097	0	0	0	0	0	0
sp|O14908|GIPC1_HUMAN	O14908	sp|O14908|GIPC1_HUMAN	>sp|O14908|GIPC1_HUMAN PDZ domain-containing protein GIPC1 OS=Homo sapiens GN=GIPC1 PE=1 SV=2	GIPC1	GIPC1	10755	4	200.159	230.283	215.239	167.416	218.468	400.686	372.213	305.902	332.183	419.106	4.92088e-05	0.0015277	0.00011348	0.000927488	8.6042e-05	7.87677e-07	4.7767e-07	9.57374e-06	5.05651e-07	2.63382e-06	5	5	206.313	366.018	24.253	46.95	0.124512	0.131121	2.31195	2.56058	0.0538672	0.0567027	0.825921	1.76293	7.67069	0.000102219	1	1	0	0	0	0
sp|Q9Y2X7-3|GIT1_HUMAN	Q9Y2X7-3	sp|Q9Y2X7-3|GIT1_HUMAN	>sp|Q9Y2X7-3|GIT1_HUMAN Isoform of Q9Y2X7, Isoform 3 of ARF GTPase-activating protein GIT1 OS=Homo sapiens GN=GIT1	GIT1	GIT1	28964	6	1098.63	973.489	982.026	1074.96	923.968	989.735	828.182	897.667	873.791	863.662	1.87739e-08	4.76666e-08	5.94867e-09	1.1142e-08	5.89235e-08	2.95189e-08	3.40924e-08	1.6902e-08	7.70195e-09	9.52057e-08	5	5	1010.62	890.607	73.4693	60.7902	0.0725875	0.066729	3.00367	2.9489	0.031483	0.0289479	-0.181938	-1.34988	-2.6715	0.0428559	0	0	0	0	0	0
sp|P17302|CXA1_HUMAN	P17302	sp|P17302|CXA1_HUMAN	>sp|P17302|CXA1_HUMAN Gap junction alpha-1 protein OS=Homo sapiens GN=GJA1 PE=1 SV=2	GJA1	GJA1	2697	4	794.251	866.803	922.53	1190.88	973.397	1402.67	1597.9	1673.16	1797.81	1583.81	1.65228e-07	2.94319e-07	2.98296e-09	1.78432e-08	3.05368e-08	1.96403e-06	6.57835e-07	1.7569e-08	9.05509e-08	8.88456e-09	5	5	949.572	1611.07	150.42	144.113	0.152945	0.0909495	2.9734	3.2057	0.0660396	0.0394175	0.771668	1.75009	7.27024	0.000145759	1	1	0	0	0	0
sp|P32189-1|GLPK_HUMAN	P32189-1	sp|P32189-1|GLPK_HUMAN	>sp|P32189-1|GLPK_HUMAN Isoform of P32189, Isoform 1 of Glycerol kinase OS=Homo sapiens GN=GK	GK	GK	2710	4	1273.96	1225.82	1203.07	1178.02	1304.23	968.41	914.566	965.482	935.614	1055.82	6.11402e-09	8.30608e-09	2.34707e-10	2.34493e-08	2.59572e-08	3.74815e-09	2.5515e-09	1.6362e-08	7.11729e-10	3.31923e-09	5	5	1237.02	967.978	51.579	53.9047	0.0415769	0.0546368	3.09208	2.98534	0.0180488	0.0237108	-0.354565	-1.78908	-6.35655	0.000372774	-1	0	0	0	0	0
sp|Q92896|GSLG1_HUMAN	Q92896	sp|Q92896|GSLG1_HUMAN	>sp|Q92896|GSLG1_HUMAN Golgi apparatus protein 1 OS=Homo sapiens GN=GLG1 PE=1 SV=2	GLG1	GLG1	2734	2	319.559	405.666	324.067	293.811	276.812	238.036	237.028	234.676	191.306	210.411	6.75903e-08	1.01226e-06	3.89809e-08	5.14645e-06	1.04354e-06	9.52682e-05	9.14963e-05	0.000482383	0.0094281	0.000288684	5	5	323.983	222.291	49.5662	20.7347	0.146268	0.0966987	2.50672	2.34534	0.0631877	0.041898	-0.536092	-1.6311	-5.11256	0.00147027	-1	0	0	0	0	0
sp|Q04760|LGUL_HUMAN	Q04760	sp|Q04760|LGUL_HUMAN	>sp|Q04760|LGUL_HUMAN Lactoylglutathione lyase OS=Homo sapiens GN=GLO1 PE=1 SV=4	GLO1	GLO1	2739	1	967.614	926.91	1097.84	1065.78	923.103	2044.32	1753.34	1800.13	1749.96	1941.7	2.80081e-08	1.48443e-08	1.53907e-09	9.14234e-09	5.10892e-08	1.00515e-07	7.93527e-08	3.02953e-08	8.94008e-08	5.18186e-08	5	5	996.251	1857.89	80.8314	130.094	0.0804694	0.0690144	2.99724	3.26819	0.034891	0.029937	0.900064	1.85512	12.604	3.8025e-06	1	1	0	0	0	0
sp|Q9HC38-2|GLOD4_HUMAN	Q9HC38-2	sp|Q9HC38-2|GLOD4_HUMAN	>sp|Q9HC38-2|GLOD4_HUMAN Isoform of Q9HC38, Isoform 2 of Glyoxalase domain-containing protein 4 OS=Homo sapiens GN=GLOD4	GLOD4	GLOD4	51031	3	732.245	646.795	708.624	680.078	683.514	755.704	664.839	702.209	667.971	647.18	2.32275e-07	5.25588e-08	3.32939e-07	9.96405e-08	1.53475e-07	2.04428e-07	1.82024e-07	4.95562e-09	4.8462e-08	3.16279e-08	5	5	690.251	687.58	32.1653	42.979	0.0467146	0.0612778	2.83863	2.83666	0.0202769	0.0265877	-0.0065297	-0.0880834	-0.110616	0.94045	0	0	0	0	0	0
sp|Q86SX6|GLRX5_HUMAN	Q86SX6	sp|Q86SX6|GLRX5_HUMAN	>sp|Q86SX6|GLRX5_HUMAN Glutaredoxin-related protein 5, mitochondrial OS=Homo sapiens GN=GLRX5 PE=1 SV=2	GLRX5	GLRX5	51218	1	69.0087	110.81	77.8404	92.8167	66.0421	139.851	126.525	109.526	113.082	152.979	2.15453e-05	0.000328927	1.27052e-07	0.000220916	0.00139035	9.64899e-07	1.00302e-07	9.18008e-08	8.00734e-08	1.86306e-05	5	5	83.3036	128.392	18.5691	18.2321	0.217728	0.141489	1.91243	2.10508	0.0934651	0.0611437	0.639967	1.53005	4.32392	0.00405071	1	1	0	0	0	0
sp|O94925|GLSK_HUMAN	O94925	sp|O94925|GLSK_HUMAN	>sp|O94925|GLSK_HUMAN Glutaminase kidney isoform, mitochondrial OS=Homo sapiens GN=GLS PE=1 SV=1	GLS	GLS	2744	16	7405.4	6038.52	7172.53	7153.66	6098.18	10289.6	9815.28	9819.51	8942.64	9491.53	3.36146e-08	1.8696e-07	7.56726e-09	3.60472e-08	5.1809e-08	4.73134e-08	7.26959e-09	8.96872e-09	1.08221e-08	2.33035e-08	5	5	6773.66	9671.71	651.786	497.049	0.0981713	0.0519303	3.82918	3.98504	0.0425331	0.0225379	0.517764	1.7673	7.02674	0.000180651	1	1	0	0	0	0
tr|F5H0U5|F5H0U5_HUMAN	F5H0U5	tr|F5H0U5|F5H0U5_HUMAN	>tr|F5H0U5|F5H0U5_HUMAN Isoform of Q9NZD2, Glycolipid transfer protein OS=Homo sapiens GN=GLTP PE=1 SV=1	GLTP	GLTP	51228	1	137.345	114.029	102.277	131.386	110.328	110.95	98.3679	90.2555	113.27	104.061	6.86139e-06	3.15791e-06	1.98448e-06	5.39981e-08	4.66152e-08	2.19183e-07	5.44539e-07	4.19696e-07	3.10533e-07	1.37688e-07	5	5	119.073	103.381	14.7436	9.39362	0.123645	0.0927055	2.07317	2.01297	0.0534946	0.0401754	-0.199969	-1.09981	-2.11596	0.0963656	0	0	0	0	0	0
sp|P00367|DHE3_HUMAN	P00367	sp|P00367|DHE3_HUMAN	>sp|P00367|DHE3_HUMAN Glutamate dehydrogenase 1, mitochondrial OS=Homo sapiens GN=GLUD1 PE=1 SV=2	GLUD1	GLUD1	2746	18	16571	15464.9	15729.1	16697.8	15902.5	18095.4	17804.7	16608.1	18413.1	20721	7.40057e-08	4.29338e-08	1.72515e-09	8.90006e-08	1.53395e-08	2.6549e-08	4.42676e-09	4.83144e-08	1.32671e-08	1.89489e-08	5	5	16073.1	18328.5	537.455	1501.62	0.0333754	0.080378	4.2059	4.26199	0.0144907	0.0348515	0.186317	1.4448	2.95263	0.0280019	0	1	0	0	0	0
sp|P15104|GLNA_HUMAN	P15104	sp|P15104|GLNA_HUMAN	>sp|P15104|GLNA_HUMAN Glutamine synthetase OS=Homo sapiens GN=GLUL PE=1 SV=4	GLUL	GLUL	2752	5	5475.81	5824.33	5434.26	5303.06	6256.47	3591.77	3232.61	3036.69	3771.4	4219.27	1.19544e-08	5.13872e-08	2.16539e-10	3.34516e-08	9.42514e-09	1.31683e-08	1.30095e-08	1.61003e-08	1.64259e-08	7.38038e-09	5	5	5658.79	3570.35	385.704	463.908	0.0668421	0.129757	3.75194	3.5498	0.0289968	0.0561176	-0.671488	-1.76452	-7.44113	0.000125381	-1	0	0	0	0	0
sp|P60983|GMFB_HUMAN	P60983	sp|P60983|GMFB_HUMAN	>sp|P60983|GMFB_HUMAN Glia maturation factor beta OS=Homo sapiens GN=GMFB PE=1 SV=2	GMFB	GMFB	2764	2	649.843	719.504	785.415	735.219	654.969	745.454	755.323	732.97	745.806	738.763	1.68158e-08	9.08674e-09	2.69543e-10	2.93875e-08	8.85164e-09	1.63057e-08	6.52912e-09	1.74207e-08	2.71699e-09	5.84907e-09	5	5	708.99	743.663	57.1312	8.39826	0.0805227	0.0112874	2.84952	2.87135	0.0349141	0.00490188	0.0725455	0.834443	1.19469	0.335151	0	1	0	0	0	0
sp|Q9Y5P6|GMPPB_HUMAN	Q9Y5P6	sp|Q9Y5P6|GMPPB_HUMAN	>sp|Q9Y5P6|GMPPB_HUMAN Mannose-1-phosphate guanyltransferase beta OS=Homo sapiens GN=GMPPB PE=1 SV=2	GMPPB	GMPPB	29925	1	98.121	106.234	97.1051	95.8732	94.3912	108.15	123.271	111.473	105.452	91.1578	5.49784e-07	8.22408e-07	7.28609e-08	1.53216e-08	7.42929e-07	1.72185e-09	6.09831e-09	3.23607e-09	9.2325e-09	4.06582e-09	5	5	98.3449	107.901	4.62518	11.5693	0.0459823	0.109471	1.99238	2.03098	0.0199593	0.0474011	0.128232	0.968202	1.66075	0.183352	0	1	0	0	0	0
sp|P36959|GMPR1_HUMAN	P36959	sp|P36959|GMPR1_HUMAN	>sp|P36959|GMPR1_HUMAN GMP reductase 1 OS=Homo sapiens GN=GMPR PE=1 SV=1	GMPR	GMPR	2766	1	108.45	133.488	128.563	131.832	116.372	99.6161	82.7965	81.93	71.1764	79.3405	2.00617e-06	2.35474e-06	7.54021e-05	4.10773e-05	2.4181e-06	2.18987e-05	1.18111e-06	3.85093e-07	2.81362e-06	9.59017e-06	5	5	123.741	82.9719	10.8607	10.3739	0.0900956	0.12182	2.09113	1.91632	0.039049	0.0527109	-0.580703	-1.71407	-6.24325	0.000416446	-1	0	0	0	0	0
sp|P29992|GNA11_HUMAN	P29992	sp|P29992|GNA11_HUMAN	>sp|P29992|GNA11_HUMAN Guanine nucleotide-binding protein subunit alpha-11 OS=Homo sapiens GN=GNA11 PE=1 SV=2	GNA11	GNA11	2767	1	341.204	380.847	350.405	426.732	319.998	76.7681	141.833	155	96.3487	57.3569	1.1096e-07	1.20038e-07	6.42616e-09	2.41911e-07	1.17176e-05	0.00678924	0.383841	0.00597386	2.01044e-05	0.0362183	5	5	363.837	105.461	41.4116	41.825	0.111486	0.435103	2.55873	1.99394	0.0482685	0.180834	-1.87617	-1.74985	-7.7573	9.48468e-05	-1	0	0	0	0	0
sp|Q14344|GNA13_HUMAN	Q14344	sp|Q14344|GNA13_HUMAN	>sp|Q14344|GNA13_HUMAN Guanine nucleotide-binding protein subunit alpha-13 OS=Homo sapiens GN=GNA13 PE=1 SV=2	GNA13	GNA13	10672	3	808.064	919.131	882.273	854.959	987.051	617.488	689.42	673.761	823.101	650.306	5.42546e-08	3.0285e-07	6.84835e-09	9.60264e-07	1.27987e-07	1.99989e-07	2.27251e-08	1.85083e-08	2.95206e-07	4.32688e-08	5	5	890.296	690.815	67.5798	78.7565	0.0755191	0.109239	2.94854	2.83724	0.0327509	0.0473014	-0.369745	-1.58805	-4.40664	0.00360142	-1	0	0	0	0	0
sp|P63096|GNAI1_HUMAN	P63096	sp|P63096|GNAI1_HUMAN	>sp|P63096|GNAI1_HUMAN Guanine nucleotide-binding protein G(i) subunit alpha-1 OS=Homo sapiens GN=GNAI1 PE=1 SV=2	GNAI1	GNAI1	2770	6	4690.53	4444.52	4693.54	4607.77	4379.76	3561.53	3217.06	3411.75	3480.48	3615.55	9.79643e-09	1.04619e-08	2.30113e-09	6.89241e-09	6.36741e-09	2.27039e-08	9.15078e-09	4.56645e-09	1.90242e-08	1.32452e-08	5	5	4563.22	3457.27	143.983	155.109	0.0317185	0.0455467	3.6591	3.53838	0.0137717	0.0197704	-0.401025	-1.83965	-7.84568	8.93054e-05	-1	0	0	0	0	0
sp|P04899|GNAI2_HUMAN	P04899	sp|P04899|GNAI2_HUMAN	>sp|P04899|GNAI2_HUMAN Guanine nucleotide-binding protein G(i) subunit alpha-2 OS=Homo sapiens GN=GNAI2 PE=1 SV=3	GNAI2	GNAI2	2771	5	2016.52	1913.39	2086.6	2040.47	2448.22	2272.09	2201.34	2476.78	2403.16	2196.51	5.85721e-09	1.77992e-08	4.18263e-10	6.83393e-09	4.63584e-09	4.79209e-09	1.21925e-09	8.53872e-09	2.29158e-09	1.91317e-09	5	5	2101.04	2309.98	204.187	125.119	0.093296	0.0537726	3.32089	3.3631	0.0404302	0.0233363	0.140244	1.10352	1.94374	0.123451	0	1	0	0	0	0
sp|P08754|GNAI3_HUMAN	P08754	sp|P08754|GNAI3_HUMAN	>sp|P08754|GNAI3_HUMAN Guanine nucleotide-binding protein G(k) subunit alpha OS=Homo sapiens GN=GNAI3 PE=1 SV=3	GNAI3	GNAI3	2773	2	291.386	296.594	291.602	287.755	254.028	161.989	168.372	192.13	185.085	164.472	4.42391e-07	4.71542e-07	1.6204e-08	1.78109e-07	2.24737e-07	0.251133	0.0204805	0.0037506	0.00030416	0.0493826	5	5	284.273	174.41	17.1975	13.3927	0.0630101	0.0759492	2.45307	2.24056	0.0273378	0.0329369	-0.705918	-1.83863	-10.3599	1.32851e-05	-1	0	0	0	0	0
sp|P09471|GNAO_HUMAN	P09471	sp|P09471|GNAO_HUMAN	>sp|P09471|GNAO_HUMAN Guanine nucleotide-binding protein G(o) subunit alpha OS=Homo sapiens GN=GNAO1 PE=1 SV=4	GNAO1	GNAO1	2775	15	46162.9	48714.7	47737.8	43821.1	45496	38173.1	41494.7	43552.6	42596	38205.2	4.4785e-08	7.68969e-08	1.01067e-08	2.16799e-08	1.49594e-07	2.79295e-08	2.29256e-08	8.33401e-08	6.08058e-08	2.60972e-08	5	5	46386.5	40804.3	1915.12	2495.94	0.0414195	0.0615816	4.66609	4.61005	0.0179805	0.0267193	-0.186172	-1.53475	-3.21491	0.0196699	0	0	0	0	0	0
sp|P50148|GNAQ_HUMAN	P50148	sp|P50148|GNAQ_HUMAN	>sp|P50148|GNAQ_HUMAN Guanine nucleotide-binding protein G(q) subunit alpha OS=Homo sapiens GN=GNAQ PE=1 SV=4	GNAQ	GNAQ	2776	4	4742.64	4590.69	4535.48	3452.2	4027.04	2857.79	3015.79	3242.17	3313.52	3115.77	7.35514e-08	6.45053e-08	2.85692e-09	2.73768e-08	2.16517e-08	6.59846e-09	5.96674e-09	2.19129e-08	4.19986e-09	7.64004e-09	5	5	4269.61	3109.01	530.223	181.244	0.131242	0.0588682	3.62752	3.49202	0.0567545	0.025544	-0.450107	-1.64056	-5.04676	0.00158972	-1	0	0	0	0	0
sp|Q5JWF2|GNAS1_HUMAN	Q5JWF2	sp|Q5JWF2|GNAS1_HUMAN	>sp|Q5JWF2|GNAS1_HUMAN Guanine nucleotide-binding protein G(s) subunit alpha isoforms XLas OS=Homo sapiens GN=GNAS PE=1 SV=2	GNAS	GNAS	2778	7	3025.29	2899.17	3034.02	3023.66	3007.7	2527.43	2308.21	2196.92	2464.49	2667.04	9.99646e-09	1.89805e-08	1.37971e-09	2.58481e-08	3.84757e-08	1.17383e-08	1.41642e-09	2.6604e-08	9.26827e-09	3.95122e-09	5	5	2997.97	2432.82	56.0393	184.387	0.018918	0.07629	3.47677	3.38511	0.00821524	0.0330843	-0.304488	-1.71688	-5.10613	0.00147842	-1	0	0	0	0	0
sp|P19086|GNAZ_HUMAN	P19086	sp|P19086|GNAZ_HUMAN	>sp|P19086|GNAZ_HUMAN Guanine nucleotide-binding protein G(z) subunit alpha OS=Homo sapiens GN=GNAZ PE=2 SV=3	GNAZ	GNAZ	2781	6	5506.89	5598.87	5666.61	5729.63	5502.41	4956.52	4641.14	5043.99	5383.29	5307.07	9.12649e-09	3.86239e-08	1.68257e-10	1.48596e-08	9.45206e-09	3.22404e-08	2.55362e-09	3.03527e-08	1.10351e-08	1.73191e-08	5	5	5600.88	5066.4	99.2866	296.545	0.0177054	0.0592363	3.7482	3.7041	0.00768876	0.0257035	-0.146518	-1.50376	-2.75006	0.0382911	0	0	0	0	0	0
sp|P62873|GBB1_HUMAN	P62873	sp|P62873|GBB1_HUMAN	>sp|P62873|GBB1_HUMAN Guanine nucleotide-binding protein G(I)/G(S)/G(T) subunit beta-1 OS=Homo sapiens GN=GNB1 PE=1 SV=3	GNB1	GNB1	2782	7	23779.4	26386	27394.7	25787.9	25252.1	24882.7	24659.7	23379	23859.5	24916	1.12392e-07	2.12133e-07	1.02894e-09	4.05272e-08	2.55174e-08	2.56614e-08	6.76847e-09	2.51239e-08	2.64151e-09	4.48071e-09	5	5	25720	24339.4	1345.14	686.092	0.0527739	0.0283925	4.40979	4.38617	0.0229035	0.0123282	-0.0784669	-1.10654	-1.49132	0.230331	0	0	0	0	0	0
sp|P62879|GBB2_HUMAN	P62879	sp|P62879|GBB2_HUMAN	>sp|P62879|GBB2_HUMAN Guanine nucleotide-binding protein G(I)/G(S)/G(T) subunit beta-2 OS=Homo sapiens GN=GNB2 PE=1 SV=3	GNB2	GNB2	2783	3	10421.8	10591.5	10635	9724.72	10572.2	9469.31	8711.8	8323.54	9514.45	9942.39	1.97203e-08	9.29211e-08	1.40456e-09	1.87917e-07	1.1634e-07	2.20346e-08	4.87628e-09	6.23294e-09	1.71154e-08	1.31698e-08	5	5	10389	9192.3	379.946	657.412	0.0374315	0.0724444	4.01634	3.96252	0.0162506	0.031421	-0.178768	-1.45892	-2.93859	0.0285835	0	0	0	0	0	0
sp|P63244|GBLP_HUMAN	P63244	sp|P63244|GBLP_HUMAN	>sp|P63244|GBLP_HUMAN Guanine nucleotide-binding protein subunit beta-2-like 1 OS=Homo sapiens GN=GNB2L1 PE=1 SV=3	GNB2L1	GNB2L1	10399	6	1353.32	1206.09	1263.09	1489.93	2442.58	1004.6	1131.13	2399.68	1160.44	1138.5	1.36768e-07	9.40553e-07	2.35546e-09	1.16179e-07	3.94051e-07	1.90994e-07	1.7633e-08	8.13964e-06	3.91648e-07	8.85865e-08	5	5	1551	1366.87	509.799	580.577	0.291148	0.361723	3.17505	3.11132	0.123881	0.152291	-0.211686	-0.471622	-0.835548	0.507197	0	0	0	0	0	0
sp|O14775-2|GBB5_HUMAN	O14775-2	sp|O14775-2|GBB5_HUMAN	>sp|O14775-2|GBB5_HUMAN Isoform of O14775, Isoform 2 of Guanine nucleotide-binding protein subunit beta-5 OS=Homo sapiens GN=GNB5	GNB5	GNB5	10681	6	2433.74	2428.08	2345.25	2273.36	2171.51	1827.12	1774.04	2075.76	1928.57	1721.72	2.58103e-08	1.48619e-08	2.84658e-09	2.7247e-08	3.39389e-08	1.40785e-08	4.13468e-09	9.43462e-09	5.62911e-08	4.97389e-09	5	5	2330.39	1865.44	110.615	140.264	0.0480016	0.0740569	3.36703	3.26982	0.0208348	0.0321185	-0.322924	-1.6983	-5.07521	0.00153968	-1	0	0	0	0	0
sp|P59768|GBG2_HUMAN	P59768	sp|P59768|GBG2_HUMAN	>sp|P59768|GBG2_HUMAN Guanine nucleotide-binding protein G(I)/G(S)/G(O) subunit gamma-2 OS=Homo sapiens GN=GNG2 PE=1 SV=2	GNG2	GNG2	54331	4	7646.34	8545.3	8677.75	8533.97	8436.92	8871.24	9191.25	9196.31	9569.58	9137.67	9.52775e-08	4.09398e-08	6.41423e-09	3.93668e-07	6.51185e-08	2.43236e-07	2.45316e-08	1.7305e-07	1.50002e-08	9.68936e-08	5	5	8368.06	9193.21	412.453	249.206	0.0508819	0.0270111	3.92218	3.96334	0.0220835	0.0117286	0.136716	1.50442	2.63835	0.0449936	0	1	0	0	0	0
sp|P63215|GBG3_HUMAN	P63215	sp|P63215|GBG3_HUMAN	>sp|P63215|GBG3_HUMAN Guanine nucleotide-binding protein G(I)/G(S)/G(O) subunit gamma-3 OS=Homo sapiens GN=GNG3 PE=3 SV=1	GNG3	GNG3	2785	2	881.274	798.823	886.112	811.812	808.841	1022.32	936.266	860.319	888.441	934.978	1.72911e-08	4.54044e-09	1.64577e-10	4.78664e-08	2.2845e-09	1.0872e-09	1.30654e-09	4.95276e-09	5.49674e-09	2.84701e-10	5	5	837.372	928.465	42.5919	61.5589	0.0505061	0.0655106	2.92247	2.96702	0.0219206	0.0284204	0.147964	1.32877	2.41282	0.0627374	0	1	0	0	0	0
sp|P50150|GBG4_HUMAN	P50150	sp|P50150|GBG4_HUMAN	>sp|P50150|GBG4_HUMAN Guanine nucleotide-binding protein G(I)/G(S)/G(O) subunit gamma-4 OS=Homo sapiens GN=GNG4 PE=1 SV=1	GNG4	GNG4	2786	1	239.739	253.174	254.137	293.753	274.319	198.843	176.795	158.29	191.483	156.087	2.70285e-08	6.79315e-09	5.54685e-10	1.20067e-09	3.5492e-09	1.9323e-09	3.86339e-10	3.21578e-09	7.82295e-10	8.51421e-10	5	5	263.024	176.299	21.1542	19.1824	0.0794573	0.109457	2.41889	2.24419	0.0344536	0.0473951	-0.580364	-1.74668	-6.8206	0.000226335	-1	0	0	0	0	0
sp|P63218|GBG5_HUMAN	P63218	sp|P63218|GBG5_HUMAN	>sp|P63218|GBG5_HUMAN Guanine nucleotide-binding protein G(I)/G(S)/G(O) subunit gamma-5 OS=Homo sapiens GN=GNG5 PE=1 SV=3	GNG5	GNG5	2787	1	46.8832	82.0594	109.844	91.3004	146.625	46.3738	80.795	77.772	84.4138	32.5367	1.08341e-05	1.58644e-06	1.99349e-06	0.228101	2.63048e-08	5.68289e-05	2.01853e-08	1.85548e-06	2.63718e-08	0.00176675	5	5	95.3424	64.3783	36.6785	23.39	0.441249	0.441767	1.95052	1.78065	0.183175	0.183372	-0.564287	-0.872868	-1.69643	0.174599	0	0	0	0	0	0
sp|O60262|GBG7_HUMAN	O60262	sp|O60262|GBG7_HUMAN	>sp|O60262|GBG7_HUMAN Guanine nucleotide-binding protein G(I)/G(S)/G(O) subunit gamma-7 OS=Homo sapiens GN=GNG7 PE=1 SV=1	GNG7	GNG7	2788	2	491.962	575.701	504.254	514.144	513.873	302.218	310.744	389.296	329.668	371.326	2.12918e-09	1.96762e-08	1.57872e-10	5.92296e-09	3.76856e-09	9.17934e-09	5.70873e-10	2.67439e-09	2.59945e-09	4.62794e-10	5	5	519.987	340.65	32.4365	38.0769	0.0605325	0.110994	2.71534	2.53017	0.0262649	0.0480566	-0.615144	-1.77709	-7.60877	0.000107427	-1	0	0	0	0	0
sp|Q9UBI6|GBG12_HUMAN	Q9UBI6	sp|Q9UBI6|GBG12_HUMAN	>sp|Q9UBI6|GBG12_HUMAN Guanine nucleotide-binding protein G(I)/G(S)/G(O) subunit gamma-12 OS=Homo sapiens GN=GNG12 PE=1 SV=3	GNG12	GNG12	55970	1	1047.43	880.721	904.883	979.524	1002.5	441.948	488.587	438.54	613.005	602.687	1.5705e-09	1.34384e-08	8.86806e-11	2.99779e-09	3.5492e-09	2.59557e-09	9.76264e-10	9.06059e-10	1.27392e-09	8.4343e-09	5	5	963.011	516.953	69.1178	85.3746	0.0722023	0.164521	2.98273	2.70878	0.0313163	0.0709738	-0.91006	-1.78624	-8.51121	5.13933e-05	-1	0	0	0	0	0
sp|Q9P2W3|GBG13_HUMAN	Q9P2W3	sp|Q9P2W3|GBG13_HUMAN	>sp|Q9P2W3|GBG13_HUMAN Guanine nucleotide-binding protein G(I)/G(S)/G(O) subunit gamma-13 OS=Homo sapiens GN=GNG13 PE=3 SV=1	GNG13	GNG13	51764	1	92.4321	110.373	94.0032	102.994	78.0509	204.298	151.739	134.516	120.544	171.714	3.37942e-05	4.07281e-06	2.66857e-07	3.37979e-06	1.31567e-06	2.32693e-07	6.30337e-10	5.49546e-08	3.40334e-06	3.48539e-06	5	5	95.5707	156.562	12.1806	32.8438	0.131428	0.208515	1.9774	2.18722	0.056834	0.0895953	0.696986	1.59835	4.93684	0.00181814	1	1	0	0	0	0
sp|P36915|GNL1_HUMAN	P36915	sp|P36915|GNL1_HUMAN	>sp|P36915|GNL1_HUMAN Guanine nucleotide-binding protein-like 1 OS=Homo sapiens GN=GNL1 PE=1 SV=2	GNL1	GNL1	2794	1	198.386	161.405	173.73	162.011	193.088	286.67	220.142	219.562	264.012	283.968	1.21875e-08	1.12047e-07	1.6118e-08	2.19553e-07	2.65446e-06	3.44083e-08	1.30094e-08	3.5921e-05	2.79674e-07	1.32086e-07	5	5	177.724	254.871	17.2637	33.1446	0.0967437	0.133067	2.24812	2.40331	0.0419174	0.0575368	0.515518	1.64111	5.18345	0.00135081	1	1	0	0	0	0
tr|D6RAY7|D6RAY7_HUMAN	D6RAY7	tr|D6RAY7|D6RAY7_HUMAN	>tr|D6RAY7|D6RAY7_HUMAN Isoform of P46926, Glucosamine-6-phosphate isomerase (Fragment) OS=Homo sapiens GN=GNPDA1 PE=1 SV=1	GNPDA1	GNPDA1	10007	1	135.497	124.463	155.906	122.247	133.993	188.699	177.192	175.664	166.155	157.941	7.62343e-07	2.84873e-06	4.1716e-08	2.29396e-07	1.42516e-07	3.76802e-09	3.05343e-09	1.32986e-09	1.88907e-09	1.72131e-09	5	5	134.421	173.13	13.3261	11.669	0.0963036	0.067659	2.12683	2.23758	0.0417276	0.0293504	0.367906	1.63938	4.79266	0.0021793	1	1	0	0	0	0
sp|Q8TDQ7-2|GNPI2_HUMAN	Q8TDQ7-2	sp|Q8TDQ7-2|GNPI2_HUMAN	>sp|Q8TDQ7-2|GNPI2_HUMAN Isoform of Q8TDQ7, Isoform 2 of Glucosamine-6-phosphate isomerase 2 OS=Homo sapiens GN=GNPDA2	GNPDA2	GNPDA2	132789	1	115.144	104.641	125.995	135.264	107.212	89.2431	98.9596	118.542	122.815	108.805	0.00182656	1.461e-05	0.00132224	1.85882e-05	0.000162339	9.92461e-08	1.83914e-06	0.00318347	8.10635e-05	2.87203e-05	5	5	117.651	107.673	12.8875	13.8227	0.108571	0.13172	2.06854	2.02916	0.0470135	0.0569595	-0.13083	-0.737059	-1.27561	0.302892	0	0	0	0	0	0
tr|M0R0R5|M0R0R5_HUMAN	M0R0R5	tr|M0R0R5|M0R0R5_HUMAN	>tr|M0R0R5|M0R0R5_HUMAN Isoform of Q2TAP0, Golgin subfamily A member 7B OS=Homo sapiens GN=GOLGA7B PE=1 SV=1	GOLGA7B	GOLGA7B	401647	1	527.586	552.048	547.517	471.254	492.661	376.409	400.428	457.533	409.162	353.315	1.32765e-07	3.04519e-06	1.52764e-07	1.08802e-07	1.92006e-07	1.85454e-06	4.38167e-06	2.91924e-05	3.14764e-06	4.08211e-07	5	5	518.213	399.369	35.1761	39.1416	0.0688376	0.097087	2.71369	2.59973	0.0298605	0.0420655	-0.378571	-1.64656	-4.89235	0.00191972	-1	0	0	0	0	0
sp|P17174|AATC_HUMAN	P17174	sp|P17174|AATC_HUMAN	>sp|P17174|AATC_HUMAN Aspartate aminotransferase, cytoplasmic OS=Homo sapiens GN=GOT1 PE=1 SV=3	GOT1	GOT1	2805	3	2975.25	3152.55	3334.95	3209.59	3187.63	3307.77	3534.17	3307.41	3232.54	2993.92	9.08278e-08	1.29016e-08	1.77474e-07	3.96465e-09	1.10209e-08	0.000120208	8.24449e-07	5.80045e-05	4.04513e-06	2.45865e-05	5	5	3171.99	3275.16	129.712	193.714	0.0412746	0.0596551	3.50104	3.51462	0.0179177	0.0258849	0.0451134	0.612439	0.787883	0.533668	0	1	0	0	0	0
sp|P00505|AATM_HUMAN	P00505	sp|P00505|AATM_HUMAN	>sp|P00505|AATM_HUMAN Aspartate aminotransferase, mitochondrial OS=Homo sapiens GN=GOT2 PE=1 SV=3	GOT2	GOT2	2806	7	18881.7	21703.2	23525.9	21226.3	20600.3	26370.5	25857.9	29307.7	25550.3	27816.9	2.78037e-08	4.94653e-08	5.59967e-10	6.54819e-08	6.07238e-08	9.012e-09	3.16809e-09	2.2284e-08	3.24441e-09	1.30172e-08	5	5	21187.5	26980.6	1687.98	1564.7	0.0800878	0.0571959	4.32497	4.43048	0.0347261	0.0248196	0.350487	1.68906	5.15291	0.00139059	1	1	0	0	0	0
sp|P35052|GPC1_HUMAN	P35052	sp|P35052|GPC1_HUMAN	>sp|P35052|GPC1_HUMAN Glypican-1 OS=Homo sapiens GN=GPC1 PE=1 SV=2	GPC1	GPC1	2817	4	1187.33	1348.78	1181.58	1052.51	1052.8	919.038	921.523	1002.36	930.813	1076.54	7.28778e-09	2.9335e-08	2.44557e-10	2.40201e-08	5.79477e-08	3.61692e-09	3.51657e-08	4.07242e-09	4.56614e-08	1.99993e-09	5	5	1164.6	970.055	122.26	68.7041	0.103321	0.0692946	3.06431	2.98595	0.0447526	0.0300582	-0.260301	-1.43128	-3.25749	0.0184544	0	0	0	0	0	0
sp|O75487-2|GPC4_HUMAN	O75487-2	sp|O75487-2|GPC4_HUMAN	>sp|O75487-2|GPC4_HUMAN Isoform of O75487, Isoform 2 of Glypican-4 OS=Homo sapiens GN=GPC4	GPC4	GPC4	2239	3	1721.29	1907.28	1756.18	1395.61	1410.17	1449.27	1401.36	1514.13	1436.89	1370.07	2.33393e-07	3.81118e-08	2.38545e-07	1.00303e-06	1.84656e-06	9.78878e-07	3.55563e-07	7.0618e-07	1.45377e-05	9.757e-07	5	5	1638.11	1434.35	225.871	54.3453	0.14056	0.0377028	3.21097	3.15641	0.060746	0.0163683	-0.181274	-1.07302	-2.01523	0.111234	0	0	0	0	0	0
sp|P21695-2|GPDA_HUMAN	P21695-2	sp|P21695-2|GPDA_HUMAN	>sp|P21695-2|GPDA_HUMAN Isoform of P21695, Isoform 2 of Glycerol-3-phosphate dehydrogenase [NAD(+)], cytoplasmic OS=Homo sapiens GN=GPD1	GPD1	GPD1	2819	1	144.809	178.994	192.023	202.385	195.954	106.417	155.137	155.836	156.917	124.547	3.43826e-07	4.34936e-08	1.83966e-10	7.15961e-08	2.02666e-09	8.25055e-09	8.0857e-10	2.09028e-08	6.6175e-10	5.92042e-10	5	5	182.833	139.771	22.9102	23.0893	0.134872	0.176742	2.25906	2.14028	0.0583105	0.0761685	-0.394591	-1.3273	-3.06286	0.0240878	0	0	0	0	0	0
sp|Q8N335|GPD1L_HUMAN	Q8N335	sp|Q8N335|GPD1L_HUMAN	>sp|Q8N335|GPD1L_HUMAN Glycerol-3-phosphate dehydrogenase 1-like protein OS=Homo sapiens GN=GPD1L PE=1 SV=1	GPD1L	GPD1L	23171	2	309.018	335.122	376.828	591.505	364.291	220.002	215.541	203.354	217.923	179.142	1.23615e-07	1.7208e-06	8.70433e-09	1.30634e-05	4.32866e-09	1.24794e-07	7.08499e-08	0.00597517	2.48223e-07	1.7616e-05	5	5	395.353	207.192	112.766	16.9597	0.256825	0.0855674	2.58495	2.31514	0.109761	0.0370937	-0.896275	-1.66728	-5.85343	0.000627195	-1	0	0	0	0	0
sp|P43304|GPDM_HUMAN	P43304	sp|P43304|GPDM_HUMAN	>sp|P43304|GPDM_HUMAN Glycerol-3-phosphate dehydrogenase, mitochondrial OS=Homo sapiens GN=GPD2 PE=1 SV=3	GPD2	GPD2	2820	10	8659.73	7323.18	7704.65	7800.47	8846.35	3486.59	3131.12	3378.98	4004.07	3776.39	7.81681e-08	4.09523e-08	3.95867e-09	1.65729e-07	4.56798e-08	1.73548e-07	1.07611e-07	5.61334e-08	1.90001e-08	7.46494e-08	5	5	8066.88	3555.43	654.66	341.326	0.080904	0.0961551	3.90557	3.54929	0.0350788	0.0416636	-1.18352	-1.86286	-14.6992	1.37764e-06	-1	0	0	0	0	0
sp|Q9NQX3|GEPH_HUMAN	Q9NQX3	sp|Q9NQX3|GEPH_HUMAN	>sp|Q9NQX3|GEPH_HUMAN Gephyrin OS=Homo sapiens GN=GPHN PE=1 SV=1	GPHN	GPHN	10243	8	2719.1	2743.46	2828.12	2723.13	2892.97	2768.31	2882.29	2933.55	2749.39	2830.17	4.56453e-08	5.23577e-08	1.40702e-09	1.23926e-07	2.30217e-08	2.08703e-09	2.73762e-09	6.5048e-09	3.58697e-09	2.99851e-09	5	5	2781.36	2832.74	76.3993	77.0099	0.027272	0.0271394	3.44413	3.45208	0.0118419	0.0117843	0.0264166	0.66825	0.573233	0.657905	0	1	0	0	0	0
sp|P06744|G6PI_HUMAN	P06744	sp|P06744|G6PI_HUMAN	>sp|P06744|G6PI_HUMAN Glucose-6-phosphate isomerase OS=Homo sapiens GN=GPI PE=1 SV=4	GPI	GPI	2821	4	3174.17	3383.68	3769.03	3004.58	3953.33	3894.93	4608.06	4042.81	3717.01	3120.46	5.56076e-09	3.3157e-08	8.61742e-10	5.2952e-09	2.69352e-09	1.40673e-08	4.62999e-09	1.19219e-08	4.02485e-09	7.51645e-09	5	5	3456.96	3876.65	398.045	538.568	0.115211	0.142308	3.5364	3.58502	0.0498704	0.0614942	0.161524	0.828689	1.48447	0.231967	0	1	0	0	0	0
sp|P51674-3|GPM6A_HUMAN	P51674-3	sp|P51674-3|GPM6A_HUMAN	>sp|P51674-3|GPM6A_HUMAN Isoform of P51674, Isoform 3 of Neuronal membrane glycoprotein M6-a OS=Homo sapiens GN=GPM6A	GPM6A	GPM6A	2823	3	15432.2	16221.8	15212.1	15340.2	15948.7	7912.9	8488.73	10113.7	9845.42	7716.9	3.93315e-08	5.45236e-09	2.24634e-09	1.62742e-08	4.88292e-08	3.39133e-09	6.23285e-10	1.61043e-09	6.22834e-09	1.84518e-09	5	5	15631	8815.53	432.884	1103.9	0.0275519	0.124677	4.19385	3.94255	0.0119634	0.0539379	-0.834805	-1.828	-10.2584	1.41484e-05	-1	0	0	0	0	0
sp|Q13491|GPM6B_HUMAN	Q13491	sp|Q13491|GPM6B_HUMAN	>sp|Q13491|GPM6B_HUMAN Neuronal membrane glycoprotein M6-b OS=Homo sapiens GN=GPM6B PE=1 SV=2	GPM6B	GPM6B	2824	4	3867.41	5665.96	5290.51	4686.98	5503.67	4341.27	5340.35	4732.21	6010.91	5203.33	3.50335e-07	4.30768e-07	3.27767e-09	2.84184e-08	9.76175e-08	1.94345e-08	1.02969e-07	4.36235e-08	5.63539e-08	5.99218e-07	5	5	5002.91	5125.61	735.234	633.615	0.157327	0.124035	3.69515	3.70709	0.0679089	0.0536624	0.0396868	0.205826	0.337558	0.799883	0	1	0	0	0	0
sp|O60883|ETBR2_HUMAN	O60883	sp|O60883|ETBR2_HUMAN	>sp|O60883|ETBR2_HUMAN Prosaposin receptor GPR37L1 OS=Homo sapiens GN=GPR37L1 PE=1 SV=2	GPR37L1	GPR37L1	9283	1	1183.34	1391.71	1336.34	1390.06	1365.79	1357.19	1399.44	1493.67	1809.82	1570.13	5.43697e-09	1.15567e-08	6.89523e-11	2.64713e-09	3.055e-09	1.40164e-09	3.51556e-10	8.54813e-10	5.77897e-10	2.30541e-10	5	5	1333.45	1526.05	86.8686	178.931	0.0678692	0.113804	3.1242	3.18128	0.0294414	0.0492654	0.189635	1.17282	2.2643	0.0784483	0	1	0	0	0	0
sp|Q5T848|GP158_HUMAN	Q5T848	sp|Q5T848|GP158_HUMAN	>sp|Q5T848|GP158_HUMAN Probable G-protein coupled receptor 158 OS=Homo sapiens GN=GPR158 PE=1 SV=1	GPR158	GPR158	57512	3	788.351	792.155	735.469	749.015	756.021	660.444	629.109	815.303	719.839	680.03	1.82595e-08	4.27725e-08	9.07448e-09	1.48287e-07	3.81374e-08	8.19638e-08	1.23724e-08	1.11785e-08	4.2059e-09	6.09424e-09	5	5	764.202	700.945	24.9384	71.8906	0.0325858	0.0997675	2.88302	2.84393	0.0141481	0.0432212	-0.12987	-1.06649	-1.8319	0.144834	0	0	0	0	0	0
tr|C9JFE4|C9JFE4_HUMAN	C9JFE4	tr|C9JFE4|C9JFE4_HUMAN	>tr|C9JFE4|C9JFE4_HUMAN Isoform of Q13098, COP9 signalosome complex subunit 1 OS=Homo sapiens GN=GPS1 PE=1 SV=2	GPS1	GPS1	2873	3	673.122	618.167	647.254	727.464	672.807	575.549	562.345	570.71	577.395	480.556	2.03275e-07	7.07265e-08	4.10065e-09	2.87288e-07	4.33053e-07	7.33001e-08	1.59208e-09	3.29528e-08	3.60902e-07	7.24808e-09	5	5	667.763	553.311	40.3075	41.086	0.0599953	0.0782788	2.824	2.74194	0.0260322	0.0339441	-0.27257	-1.58396	-4.00179	0.00633319	0	0	0	0	0	0
sp|P36969-2|GPX4_HUMAN	P36969-2	sp|P36969-2|GPX4_HUMAN	>sp|P36969-2|GPX4_HUMAN Isoform of P36969, Isoform Cytoplasmic of Phospholipid hydroperoxide glutathione peroxidase, mitochondrial OS=Homo sapiens GN=GPX4	GPX4	GPX4	2879	1	83.5342	95.3052	80.3612	87.7672	86.3814	83.631	88.6329	90.2764	78.0477	79.7796	5.36135e-06	5.63366e-08	2.01305e-06	2.50577e-06	6.51263e-06	1.26666e-07	4.54103e-07	2.24146e-08	9.12539e-08	3.61017e-08	5	5	86.6698	84.0735	5.60107	5.34338	0.0637952	0.0636062	1.93716	1.92396	0.0276778	0.0275959	-0.0438438	-0.489391	-0.680677	0.593419	0	0	0	0	0	0
sp|P62993|GRB2_HUMAN	P62993	sp|P62993|GRB2_HUMAN	>sp|P62993|GRB2_HUMAN Growth factor receptor-bound protein 2 OS=Homo sapiens GN=GRB2 PE=1 SV=1	GRB2	GRB2	2885	2	491.107	526.832	495.571	479.194	439.449	482.212	401.025	384.74	428.174	389.555	2.30389e-07	7.94216e-09	1.29537e-07	2.84578e-08	5.94798e-07	1.88904e-08	6.37619e-08	4.74531e-08	7.61256e-08	9.84969e-09	5	5	486.43	417.141	31.6123	40.0829	0.0658953	0.092942	2.68627	2.61875	0.028587	0.0402774	-0.224302	-1.39267	-2.98986	0.0267118	0	0	0	0	0	0
sp|P42261-4|GRIA1_HUMAN;sp|P42261-2|GRIA1_HUMAN	P42261-4;P42261-2	sp|P42261-4|GRIA1_HUMAN;sp|P42261-2|GRIA1_HUMAN	>sp|P42261-4|GRIA1_HUMAN Isoform of P42261, Isoform 4 of Glutamate receptor 1 OS=Homo sapiens GN=GRIA1;>sp|P42261-2|GRIA1_HUMAN Isoform of P42261, Isoform Flip of Glutamate receptor 1 OS=Homo sapiens GN=GRIA1	GRIA1	GRIA1	2890	16	12211.1	12610.5	11480.9	11073.3	10809.4	6388.94	7032.82	8661.63	7921.51	7390.9	3.7892e-08	2.68472e-08	1.21171e-09	3.44366e-08	1.64e-08	9.80261e-09	2.196e-09	1.01178e-08	6.213e-09	9.16451e-09	5	5	11637	7479.16	758.999	864.506	0.0649711	0.115988	4.06511	3.87153	0.0281869	0.0502046	-0.643045	-1.77584	-7.65947	0.000103047	-1	0	0	0	0	0
sp|P42262-2|GRIA2_HUMAN;sp|P42262|GRIA2_HUMAN	P42262-2;P42262	sp|P42262-2|GRIA2_HUMAN;sp|P42262|GRIA2_HUMAN	>sp|P42262-2|GRIA2_HUMAN Isoform of P42262, Isoform Flip of Glutamate receptor 2 OS=Homo sapiens GN=GRIA2;>sp|P42262|GRIA2_HUMAN Glutamate receptor 2 OS=Homo sapiens GN=GRIA2 PE=1 SV=3	GRIA2	GRIA2	2891	21	21775.4	24963.8	23629.3	21583.9	21502.6	14377.6	14693.7	16911.8	16142.1	16299.8	1.41381e-08	8.42483e-08	5.65488e-09	3.94206e-08	7.72952e-08	3.83037e-08	1.27477e-08	4.29249e-08	4.71217e-08	2.56786e-08	5	5	22691	15685	1542.91	1093.59	0.0668394	0.0704282	4.35507	4.19463	0.0289956	0.0305488	-0.532969	-1.80068	-7.9025	8.56439e-05	-1	0	0	0	0	0
sp|P42263-2|GRIA3_HUMAN;sp|P42263|GRIA3_HUMAN	P42263-2;P42263	sp|P42263-2|GRIA3_HUMAN;sp|P42263|GRIA3_HUMAN	>sp|P42263-2|GRIA3_HUMAN Isoform of P42263, Isoform Flip of Glutamate receptor 3 OS=Homo sapiens GN=GRIA3;>sp|P42263|GRIA3_HUMAN Glutamate receptor 3 OS=Homo sapiens GN=GRIA3 PE=1 SV=2	GRIA3	GRIA3	2892	9	2299.39	1899.68	2017.8	2035.18	2031.6	1301.66	1226.43	1404.05	1499.59	1355.41	3.80189e-08	5.52559e-08	1.65489e-08	4.95094e-08	4.16528e-08	2.91744e-07	4.19958e-08	2.77932e-07	1.51253e-07	4.57548e-08	5	5	2056.73	1357.43	146.766	103.268	0.0696468	0.0760942	3.31232	3.13171	0.0302106	0.0329996	-0.599967	-1.81056	-8.55534	4.95834e-05	-1	0	0	0	0	0
tr|G3V164|G3V164_HUMAN	G3V164	tr|G3V164|G3V164_HUMAN	>tr|G3V164|G3V164_HUMAN Isoform of P48058, Glutamate receptor 4 OS=Homo sapiens GN=GRIA4 PE=1 SV=1	GRIA4	GRIA4	2893	1	128.425	140.156	144.666	135.357	144.496	115.184	135.508	125.723	126.322	125.198	2.64004e-06	4.4414e-05	4.39011e-07	7.25549e-06	1.09784e-07	4.63284e-05	7.3815e-05	1.98039e-06	8.12962e-07	0.000773117	5	5	138.62	125.587	6.85613	7.19985	0.0501953	0.0576958	2.14139	2.09837	0.0217858	0.0250361	-0.142918	-1.358	-2.43052	0.0611152	0	0	0	0	0	0
sp|Q9ULK0-2|GRID1_HUMAN	Q9ULK0-2	sp|Q9ULK0-2|GRID1_HUMAN	>sp|Q9ULK0-2|GRID1_HUMAN Isoform of Q9ULK0, Isoform 2 of Glutamate receptor ionotropic, delta-1 OS=Homo sapiens GN=GRID1	GRID1	GRID1	2894	1	83.6226	93.2564	82.3513	80.7302	81.0887	65.7517	72.8336	66.6814	68.1046	78.1431	3.67706e-08	2.33956e-06	2.51924e-07	5.01001e-06	8.45665e-08	5.26444e-06	3.14134e-07	2.59634e-05	1.20089e-08	3.72004e-10	5	5	84.2098	70.3029	5.18383	5.16079	0.0595423	0.0720182	1.92473	1.84606	0.025836	0.0312367	-0.261342	-1.58955	-3.96862	0.00660717	0	0	0	0	0	0
tr|A0A0A0MRL4|A0A0A0MRL4_HUMAN	A0A0A0MRL4	tr|A0A0A0MRL4|A0A0A0MRL4_HUMAN	>tr|A0A0A0MRL4|A0A0A0MRL4_HUMAN Isoform of Q13002, Glutamate receptor ionotropic, kainate 2 OS=Homo sapiens GN=GRIK2 PE=1 SV=1	GRIK2	GRIK2	2898	3	285.211	259.188	250.821	253.804	306.524	215.526	200.047	195.07	197.996	211.11	9.41352e-07	1.62389e-05	8.7499e-05	1.51179e-07	8.01857e-07	3.17427e-05	5.06378e-05	8.03246e-05	0.00155623	0.000962447	5	5	271.11	203.95	24.0116	8.87144	0.0867954	0.0432303	2.43182	2.3092	0.037624	0.0187659	-0.407349	-1.7407	-6.04662	0.000498597	-1	0	0	0	0	0
sp|Q05586|NMDZ1_HUMAN	Q05586	sp|Q05586|NMDZ1_HUMAN	>sp|Q05586|NMDZ1_HUMAN Glutamate receptor ionotropic, NMDA 1 OS=Homo sapiens GN=GRIN1 PE=1 SV=1	GRIN1	GRIN1	2902	16	6404.27	7200.77	6855.4	6740.91	8265.96	4963.04	5317.49	6227.59	6745.95	5268.63	1.35277e-07	2.86329e-08	5.96568e-10	3.95608e-08	2.44982e-08	3.20598e-08	7.33839e-09	1.45654e-08	4.397e-08	3.28284e-08	5	5	7093.46	5704.54	714.533	749.627	0.0973922	0.129212	3.84918	3.7533	0.0421971	0.0558838	-0.318492	-1.39364	-3.24633	0.018728	0	0	0	0	0	0
tr|A0A0A0MS72|A0A0A0MS72_HUMAN	A0A0A0MS72	tr|A0A0A0MS72|A0A0A0MS72_HUMAN	>tr|A0A0A0MS72|A0A0A0MS72_HUMAN Isoform of Q12879, Glutamate receptor ionotropic, NMDA 2A OS=Homo sapiens GN=GRIN2A PE=1 SV=1	GRIN2A	GRIN2A	2903	6	1864.37	1715.88	1689.06	1652.14	1851.03	1162.42	1060.15	1317.2	1306.6	1240.84	1.05231e-08	7.77006e-09	8.86375e-10	2.90842e-09	7.70253e-09	1.22208e-07	1.81492e-08	1.10462e-08	4.21228e-09	9.01675e-08	5	5	1754.5	1217.44	97.0043	107.492	0.05505	0.0907212	3.24362	3.08405	0.0238898	0.039319	-0.530104	-1.78253	-7.41965	0.000127197	-1	0	0	0	0	0
sp|Q13224|NMDE2_HUMAN	Q13224	sp|Q13224|NMDE2_HUMAN	>sp|Q13224|NMDE2_HUMAN Glutamate receptor ionotropic, NMDA 2B OS=Homo sapiens GN=GRIN2B PE=1 SV=3	GRIN2B	GRIN2B	2904	11	3766.8	3286.54	3592.88	3334.49	3742.56	2543.39	2488.99	2790.59	3103.85	2610.78	2.46202e-08	2.4331e-08	3.68941e-09	9.13917e-09	4.18671e-08	1.73945e-08	1.66168e-09	9.953e-09	1.78863e-08	1.13945e-08	5	5	3544.65	2707.52	224.516	249.015	0.0638373	0.0893966	3.54887	3.43116	0.027696	0.0387472	-0.391024	-1.689	-5.34565	0.00111799	-1	0	0	0	0	0
tr|F5H4N6|F5H4N6_HUMAN	F5H4N6	tr|F5H4N6|F5H4N6_HUMAN	>tr|F5H4N6|F5H4N6_HUMAN Isoform of Q9Y3R0, Glutamate receptor-interacting protein 1 (Fragment) OS=Homo sapiens GN=GRIP1 PE=1 SV=1	GRIP1	GRIP1	23426	1	139.734	126.563	116.922	138.657	105.755	199.152	198.347	210.521	183.126	186.677	2.40211e-07	1.06632e-06	4.49454e-08	1.08026e-07	1.67249e-07	3.11592e-09	1.03918e-09	1.55503e-06	1.44954e-08	6.70273e-09	5	5	125.526	195.565	14.4939	10.9318	0.118447	0.0557998	2.09635	2.29075	0.0512619	0.0242147	0.645781	1.78011	7.78292	9.26368e-05	1	1	0	0	0	0
tr|A0A087WT45|A0A087WT45_HUMAN	A0A087WT45	tr|A0A087WT45|A0A087WT45_HUMAN	>tr|A0A087WT45|A0A087WT45_HUMAN Isoform of Q4V328, GRIP1-associated protein 1 OS=Homo sapiens GN=GRIPAP1 PE=1 SV=1	GRIPAP1	GRIPAP1	56850	3	240.383	201.85	224.29	217.921	243.252	356.93	337.649	271.413	273.918	343.122	6.4525e-05	6.22864e-06	0.000232414	0.000862438	4.62497e-05	6.29551e-09	9.43413e-08	7.12598e-07	3.30749e-08	1.38308e-07	5	5	225.539	316.607	16.9918	40.7328	0.076397	0.132335	2.35222	2.49755	0.0331305	0.0572232	0.482776	1.64448	5.15723	0.00138757	1	1	0	0	0	0
sp|Q13255-2|GRM1_HUMAN	Q13255-2	sp|Q13255-2|GRM1_HUMAN	>sp|Q13255-2|GRM1_HUMAN Isoform of Q13255, Isoform Beta of Metabotropic glutamate receptor 1 OS=Homo sapiens GN=GRM1	GRM1	GRM1	2911	3	396.975	420.939	376.475	367.206	365.473	240.121	267.888	287.757	244.289	293.184	6.02573e-08	6.0349e-07	4.72318e-09	2.80347e-08	2.08682e-07	9.96376e-08	1.3338e-06	1.37079e-07	1.86484e-08	5.61353e-08	5	5	385.414	266.648	23.4775	24.2638	0.0599538	0.0915989	2.5853	2.42449	0.0260143	0.0396978	-0.534188	-1.77753	-7.32034	0.000137478	-1	0	0	0	0	0
sp|Q14416|GRM2_HUMAN	Q14416	sp|Q14416|GRM2_HUMAN	>sp|Q14416|GRM2_HUMAN Metabotropic glutamate receptor 2 OS=Homo sapiens GN=GRM2 PE=1 SV=2	GRM2	GRM2	2912	4	945.541	1030.68	1029.03	1046.9	1033.29	563.98	179.884	158.869	209.533	423.677	6.63956e-09	1.29587e-07	5.05664e-10	1.24832e-08	6.02667e-09	5.42591e-07	0.317257	0.243547	0.266304	5.94581e-06	5	5	1017.09	307.189	40.612	178.363	0.0409896	0.607373	3.00707	2.43112	0.0177941	0.243364	-1.91328	-1.67236	-6.10376	0.00047356	-1	0	0	0	0	0
sp|Q14832|GRM3_HUMAN	Q14832	sp|Q14832|GRM3_HUMAN	>sp|Q14832|GRM3_HUMAN Metabotropic glutamate receptor 3 OS=Homo sapiens GN=GRM3 PE=1 SV=2	GRM3	GRM3	2913	3	318.592	351.604	384.337	376.303	416.983	300.592	297.229	280.372	339.213	315.07	3.73565e-07	3.15233e-07	6.49064e-07	6.96597e-08	7.85104e-08	1.11727e-07	5.4908e-08	2.24436e-07	2.57724e-07	2.08958e-08	5	5	369.564	306.495	36.8541	22.063	0.101331	0.071302	2.56593	2.48554	0.0438952	0.0309268	-0.267066	-1.44936	-3.35198	0.0161066	0	0	0	0	0	0
sp|P41594|GRM5_HUMAN	P41594	sp|P41594|GRM5_HUMAN	>sp|P41594|GRM5_HUMAN Metabotropic glutamate receptor 5 OS=Homo sapiens GN=GRM5 PE=1 SV=2	GRM5	GRM5	2915	4	979.238	1019.71	1097.81	985.246	926.751	533.107	543.364	640.65	607.529	593.57	4.68531e-09	3.77312e-08	2.41706e-08	5.0918e-08	4.35325e-08	8.82918e-05	2.26535e-06	1.55413e-05	4.56361e-06	2.8411e-05	5	5	1001.75	583.644	63.1534	44.9864	0.0623826	0.0773585	3.00008	2.76511	0.0270661	0.0335463	-0.780542	-1.84826	-11.4039	6.95842e-06	-1	0	0	0	0	0
sp|Q14831|GRM7_HUMAN	Q14831	sp|Q14831|GRM7_HUMAN	>sp|Q14831|GRM7_HUMAN Metabotropic glutamate receptor 7 OS=Homo sapiens GN=GRM7 PE=1 SV=1	GRM7	GRM7	2917	6	1101.7	906.18	1010.47	931.012	1045.96	827.295	771.853	910.803	966.451	880.934	2.96925e-08	2.30284e-06	7.68754e-09	2.49737e-07	2.28634e-06	1.38473e-06	6.61379e-08	1.34812e-07	1.31247e-07	4.52504e-07	5	5	999.065	871.467	80.8111	75.0548	0.0811585	0.0870013	2.99845	2.93895	0.0351889	0.037713	-0.197674	-1.27857	-2.5548	0.0509917	0	0	0	0	0	0
sp|P49840|GSK3A_HUMAN	P49840	sp|P49840|GSK3A_HUMAN	>sp|P49840|GSK3A_HUMAN Glycogen synthase kinase-3 alpha OS=Homo sapiens GN=GSK3A PE=1 SV=2	GSK3A	GSK3A	2931	2	505.559	525.357	618.667	534.938	543.853	667.936	561.281	581.355	614.582	627.228	4.11131e-09	5.60331e-09	1.39034e-09	2.86366e-07	6.68613e-09	1.0401e-09	3.29144e-09	9.16094e-09	5.01955e-10	1.3838e-08	5	5	545.675	610.476	43.2104	41.4346	0.0766123	0.067717	2.73589	2.78487	0.0332236	0.0293755	0.162704	1.24791	2.33359	0.0703815	0	1	0	0	0	0
sp|P49841|GSK3B_HUMAN	P49841	sp|P49841|GSK3B_HUMAN	>sp|P49841|GSK3B_HUMAN Glycogen synthase kinase-3 beta OS=Homo sapiens GN=GSK3B PE=1 SV=2	GSK3B	GSK3B	2932	5	1416.97	1515.15	1494.25	1597.17	1335.32	859.333	733.242	819.753	854.712	749.778	1.24422e-08	9.97188e-08	8.94791e-10	1.97024e-08	8.05436e-09	1.04316e-07	1.3739e-07	1.16069e-07	1.25295e-06	2.57425e-07	5	5	1471.77	803.364	99.6665	58.7927	0.068359	0.0740362	3.16704	2.90397	0.0296534	0.0321096	-0.873887	-1.8568	-12.6534	3.8025e-06	-1	0	0	0	0	0
sp|P00390-2|GSHR_HUMAN	P00390-2	sp|P00390-2|GSHR_HUMAN	>sp|P00390-2|GSHR_HUMAN Isoform of P00390, Isoform Cytoplasmic of Glutathione reductase, mitochondrial OS=Homo sapiens GN=GSR	GSR	GSR	2936	1	247.944	270.236	290.571	298.816	277.227	358.461	375.706	388.59	401.312	415.316	2.24874e-05	2.20894e-06	6.38894e-07	2.64777e-05	1.02915e-06	9.47347e-09	2.12787e-09	1.44258e-08	5.69517e-06	8.12444e-10	5	5	276.959	387.877	19.6859	22.0644	0.0723821	0.0571933	2.44152	2.58813	0.0313941	0.0248185	0.487031	1.79347	7.45418	0.000124253	1	1	0	0	0	0
tr|A0A087WXM2|A0A087WXM2_HUMAN	A0A087WXM2	tr|A0A087WXM2|A0A087WXM2_HUMAN	>tr|A0A087WXM2|A0A087WXM2_HUMAN Isoform of Q16772, Glutathione S-transferase OS=Homo sapiens GN=GSTA3 PE=1 SV=1	GSTA3	GSTA3	2940	1	183.525	143.433	176.293	94.3987	47.5848	1043.53	1051.62	1380.13	1354.93	1204.38	0.117709	0.0619458	0.198318	0.230116	0.0304963	2.11349e-08	9.24832e-07	4.7512e-09	4.09036e-07	5.03682e-10	5	5	129.047	1206.92	57.5402	160.256	0.610508	0.134059	2.0638	3.07859	0.24444	0.057962	3.37106	1.81067	10.451	1.2773e-05	1	1	0	0	0	0
sp|P09488|GSTM1_HUMAN	P09488	sp|P09488|GSTM1_HUMAN	>sp|P09488|GSTM1_HUMAN Glutathione S-transferase Mu 1 OS=Homo sapiens GN=GSTM1 PE=1 SV=3	GSTM1	GSTM1	2944	2	192.935	148.427	183.501	118.336	183.235	1510.4	1555.03	1506.11	1532.4	1781.3	0.183846	0.250819	0.25606	0.210641	0.184391	3.00911e-05	3.82713e-06	3.94432e-05	3.53468e-06	0.010279	5	5	165.287	1577.05	31.2528	115.832	0.206764	0.0704719	2.21134	3.19696	0.0888583	0.0305677	3.27417	1.88372	25.8889	1.49219e-08	1	1	0	0	0	0
sp|P21266|GSTM3_HUMAN	P21266	sp|P21266|GSTM3_HUMAN	>sp|P21266|GSTM3_HUMAN Glutathione S-transferase Mu 3 OS=Homo sapiens GN=GSTM3 PE=1 SV=3	GSTM3	GSTM3	2947	1	985.25	936.799	1148.59	1081.31	995.737	538.784	594.082	552.346	627.189	586.288	1.81617e-06	1.319e-08	2.28223e-09	8.4778e-09	1.01875e-08	1.08566e-08	4.54362e-08	9.4202e-07	2.74077e-07	5.86678e-08	5	5	1029.54	579.738	84.4962	35.0992	0.0812269	0.0604955	3.01149	2.7626	0.0352184	0.0262489	-0.826809	-1.85179	-11.9332	4.98366e-06	-1	0	0	0	0	0
sp|P09211|GSTP1_HUMAN	P09211	sp|P09211|GSTP1_HUMAN	>sp|P09211|GSTP1_HUMAN Glutathione S-transferase P OS=Homo sapiens GN=GSTP1 PE=1 SV=2	GSTP1	GSTP1	2950	1	677.546	690.822	722.555	654.81	758.508	215.385	223.26	246.091	261.467	204.344	9.52506e-08	2.17425e-06	7.25339e-10	1.91652e-08	2.53413e-08	3.68354e-07	3.75491e-07	7.88876e-07	2.79907e-08	3.34565e-07	5	5	700.848	230.109	40.4935	23.2719	0.0573624	0.100422	2.84505	2.36018	0.0248917	0.0435033	-1.6107	-1.88135	-21.2488	4.79596e-08	-1	0	0	0	0	0
sp|P33402|GCYA2_HUMAN	P33402	sp|P33402|GCYA2_HUMAN	>sp|P33402|GCYA2_HUMAN Guanylate cyclase soluble subunit alpha-2 OS=Homo sapiens GN=GUCY1A2 PE=2 SV=1	GUCY1A2	GUCY1A2	2977	1	53.4594	87.3897	83.0006	62.2997	48.1976	36.1705	40.3186	46.1695	18.2758	28.852	9.36245e-07	5.47101e-05	4.79899e-06	4.31988e-07	0.000503665	0.124094	0.0155092	0.0697609	0.0237342	0.053823	5	5	66.8694	33.9573	17.5403	10.799	0.267688	0.375131	1.81322	1.51005	0.11425	0.157585	-1.00708	-1.47284	-4.00826	0.00627382	0	0	0	0	0	0
sp|Q02153|GCYB1_HUMAN	Q02153	sp|Q02153|GCYB1_HUMAN	>sp|Q02153|GCYB1_HUMAN Guanylate cyclase soluble subunit beta-1 OS=Homo sapiens GN=GUCY1B3 PE=1 SV=1	GUCY1B3	GUCY1B3	2983	5	402.335	395.629	396.068	371.445	393.629	292.079	244.065	287.621	260.817	221.423	6.22446e-06	3.64199e-06	1.49558e-07	4.2708e-06	9.97317e-06	2.38168e-05	0.000363943	0.000207044	0.000503469	7.01133e-05	5	5	391.821	261.201	11.8484	29.6965	0.0307623	0.116072	2.59293	2.41468	0.0133567	0.0502408	-0.592128	-1.7801	-7.60964	0.000107427	-1	0	0	0	0	0
sp|P13807-2|GYS1_HUMAN	P13807-2	sp|P13807-2|GYS1_HUMAN	>sp|P13807-2|GYS1_HUMAN Isoform of P13807, Isoform 2 of Glycogen [starch] synthase, muscle OS=Homo sapiens GN=GYS1	GYS1	GYS1	2997	1	34.2766	51.7387	22.7941	59.9356	37.6625	61.804	61.9441	52.4499	58.8705	48.4012	0.00649397	0.306618	0.299074	0.0223724	0.000283377	5.26186e-05	0.000102251	2.73768e-05	6.58082e-06	3.63986e-06	5	5	41.2815	56.6939	14.6738	6.02488	0.391654	0.109488	1.59205	1.7515	0.164062	0.0474082	0.529705	1.12684	2.39348	0.0646052	0	1	0	0	0	0
sp|Q71UI9-5|H2AV_HUMAN	Q71UI9-5	sp|Q71UI9-5|H2AV_HUMAN	>sp|Q71UI9-5|H2AV_HUMAN Isoform of Q71UI9, Isoform 5 of Histone H2A.V OS=Homo sapiens GN=H2AFV	H2AFV	H2AFV	94239	1	281.187	123.218	220.367	355.445	662.63	533.748	637.198	435.023	1055.49	1052.38	7.53371e-09	7.8357e-05	1.49888e-08	3.72547e-09	1.27238e-08	5.45169e-09	2.94383e-10	2.21472e-09	1.2793e-09	4.91531e-10	5	5	328.569	742.768	205.208	292.915	0.68253	0.417755	2.45097	2.84315	0.268573	0.174183	1.30279	1.32004	3.17949	0.0206663	0	1	0	0	0	0
sp|Q16836|HCDH_HUMAN	Q16836	sp|Q16836|HCDH_HUMAN	>sp|Q16836|HCDH_HUMAN Hydroxyacyl-coenzyme A dehydrogenase, mitochondrial OS=Homo sapiens GN=HADH PE=1 SV=3	HADH	HADH	3033	1	152.759	179.301	148.475	157.03	180.688	85.1445	90.079	106.881	103.061	88.3628	1.42564e-07	9.69017e-09	1.36083e-09	3.65571e-07	4.53241e-09	5.07659e-07	2.1317e-09	3.66942e-07	1.56426e-09	1.16513e-08	5	5	163.65	94.7057	15.2315	9.63199	0.0924081	0.100669	2.21243	1.97461	0.0400471	0.0436096	-0.790027	-1.80975	-9.21039	2.95583e-05	-1	0	0	0	0	0
sp|P40939|ECHA_HUMAN	P40939	sp|P40939|ECHA_HUMAN	>sp|P40939|ECHA_HUMAN Trifunctional enzyme subunit alpha, mitochondrial OS=Homo sapiens GN=HADHA PE=1 SV=2	HADHA	HADHA	3030	2	426.479	372.686	382.863	433.87	507.745	250.056	213.384	318.659	315.224	239.848	4.78611e-09	9.41195e-07	3.14979e-08	3.58538e-09	3.65474e-09	9.72708e-05	0.00325941	2.62192e-07	5.26319e-08	4.79163e-05	5	5	424.729	267.434	53.4777	47.1494	0.122947	0.177669	2.62546	2.42182	0.0531949	0.0765618	-0.676484	-1.64194	-5.38701	0.00105783	-1	0	0	0	0	0
sp|P55084-2|ECHB_HUMAN	P55084-2	sp|P55084-2|ECHB_HUMAN	>sp|P55084-2|ECHB_HUMAN Isoform of P55084, Isoform 2 of Trifunctional enzyme subunit beta, mitochondrial OS=Homo sapiens GN=HADHB	HADHB	HADHB	3032	3	1309.77	1288.04	1268.36	1360.44	1841.05	1302.64	1214.65	1341.09	1373.86	1390.03	1.49072e-06	7.96263e-09	4.64354e-08	3.08053e-09	4.32407e-09	1.408e-06	6.8617e-06	4.54115e-06	1.71118e-09	9.19101e-09	5	5	1413.53	1324.45	241.442	69.9146	0.156637	0.0538733	3.14582	3.12154	0.0676149	0.0233799	-0.0806639	-0.491719	-0.807704	0.522821	0	0	0	0	0	0
sp|P10915|HPLN1_HUMAN	P10915	sp|P10915|HPLN1_HUMAN	>sp|P10915|HPLN1_HUMAN Hyaluronan and proteoglycan link protein 1 OS=Homo sapiens GN=HAPLN1 PE=2 SV=2	HAPLN1	HAPLN1	1404	5	2664.84	3844.07	3136.87	2203.63	2552.22	3448.62	3374.78	4586.38	3262.84	4214.25	2.79738e-08	7.44086e-08	9.85372e-10	1.61474e-07	1.85585e-08	1.44322e-08	8.27439e-08	1.11294e-08	3.06484e-09	9.50987e-08	5	5	2880.33	3777.38	633.764	587.421	0.215309	0.152228	3.4514	3.57314	0.0924503	0.0657335	0.404387	1.22747	2.69325	0.0414428	0	1	0	0	0	1
sp|Q9GZV7|HPLN2_HUMAN	Q9GZV7	sp|Q9GZV7|HPLN2_HUMAN	>sp|Q9GZV7|HPLN2_HUMAN Hyaluronan and proteoglycan link protein 2 OS=Homo sapiens GN=HAPLN2 PE=2 SV=1	HAPLN2	HAPLN2	60484	1	985.163	2110.84	1714.97	1437.52	2144.27	1635.57	1630.83	1707.54	2445.61	1941.74	2.46585e-06	1.68035e-06	1.28464e-06	7.25979e-06	9.92029e-06	6.4025e-07	1.61513e-07	1.33014e-08	0.00013338	5.25342e-09	5	5	1678.55	1872.26	485.792	344.603	0.330018	0.172838	3.20822	3.26701	0.139637	0.074511	0.195271	0.534533	0.949374	0.447482	0	1	0	0	0	1
sp|Q86UW8|HPLN4_HUMAN	Q86UW8	sp|Q86UW8|HPLN4_HUMAN	>sp|Q86UW8|HPLN4_HUMAN Hyaluronan and proteoglycan link protein 4 OS=Homo sapiens GN=HAPLN4 PE=2 SV=1	HAPLN4	HAPLN4	404037	6	942.473	1193.58	1039.11	836.869	879.92	1228.29	1410.72	1625	1345.6	1249.29	4.60295e-06	1.91485e-06	7.41068e-07	0.000135651	2.46587e-05	4.11544e-08	7.73942e-09	9.57265e-09	1.89048e-08	8.74525e-08	5	5	978.391	1371.78	142.311	159.624	0.142024	0.112912	2.98698	3.13503	0.0613727	0.0488818	0.491838	1.57605	4.55545	0.00295251	1	1	0	0	0	1
sp|O00165-5|HAX1_HUMAN	O00165-5	sp|O00165-5|HAX1_HUMAN	>sp|O00165-5|HAX1_HUMAN Isoform of O00165, Isoform 5 of HCLS1-associated protein X-1 OS=Homo sapiens GN=HAX1	HAX1	HAX1	10456	1	71.3864	92.0509	61.5321	79.4159	91.4193	54.7156	99.5429	79.965	115.513	69.2175	0.0157497	5.07072e-06	9.22273e-05	0.00201462	0.000592617	0.000354239	9.18506e-06	7.47587e-05	2.92302e-06	3.07286e-05	5	5	79.1609	83.7908	13.112	24.1186	0.17228	0.30115	1.89354	1.90837	0.0742738	0.12796	0.0492833	0.149939	0.25559	0.850266	0	1	0	0	0	0
sp|P69905|HBA_HUMAN	P69905	sp|P69905|HBA_HUMAN	>sp|P69905|HBA_HUMAN Hemoglobin subunit alpha OS=Homo sapiens GN=HBA1 PE=1 SV=2	HBA1	HBA1	3039	2	1000.56	1438.28	1460.22	1038.74	1916.58	3050.96	3257.01	6462.54	4115.29	4108.84	3.51733e-09	1.11568e-08	2.11015e-09	3.36495e-08	3.2657e-08	3.06164e-07	8.82371e-09	2.43887e-07	6.22855e-08	1.73477e-07	5	5	1370.88	4198.93	373.417	1355	0.274426	0.300837	3.12431	3.60716	0.117025	0.127832	1.60399	1.72764	7.1452	0.00016271	1	1	0	0	0	0
sp|P53701|CCHL_HUMAN	P53701	sp|P53701|CCHL_HUMAN	>sp|P53701|CCHL_HUMAN Cytochrome c-type heme lyase OS=Homo sapiens GN=HCCS PE=1 SV=1	HCCS	HCCS	3052	3	267.449	231.843	212.19	242.404	262.977	318.636	331.333	299.567	361.097	313.992	0.000257928	0.0205543	0.000224886	2.26083e-05	0.00182165	2.64151e-06	3.27308e-05	5.65268e-06	2.63289e-08	1.71609e-05	5	5	243.373	324.925	22.7498	23.1924	0.095093	0.0701908	2.38472	2.51092	0.0412055	0.030446	0.419212	1.68782	5.4444	0.00100192	1	1	0	0	0	0
sp|Q9UL51|HCN2_HUMAN	Q9UL51	sp|Q9UL51|HCN2_HUMAN	>sp|Q9UL51|HCN2_HUMAN Potassium/sodium hyperpolarization-activated cyclic nucleotide-gated channel 2 OS=Homo sapiens GN=HCN2 PE=1 SV=3	HCN2	HCN2	610	1	123.096	137.977	133.145	125.223	132.385	92.5514	93.4505	114.837	97.9015	109.568	8.4337e-07	6.3561e-06	1.64525e-08	4.46289e-06	3.30092e-07	6.46878e-09	8.36026e-06	1.8629e-08	4.34383e-08	1.92583e-08	5	5	130.365	101.662	6.10409	10.0084	0.0469566	0.0973327	2.11478	2.0055	0.0203818	0.0421715	-0.363005	-1.66798	-5.01967	0.00164289	-1	0	0	0	0	0
tr|B5MCS3|B5MCS3_HUMAN	B5MCS3	tr|B5MCS3|B5MCS3_HUMAN	>tr|B5MCS3|B5MCS3_HUMAN Isoform of Q96DB2, Histone deacetylase 11 OS=Homo sapiens GN=HDAC11 PE=1 SV=1	HDAC11	HDAC11	79885	1	107.034	121.002	144.473	109.386	124.378	96.2586	96.9748	92.1626	110.629	90.8428	7.02568e-05	2.49205e-07	1.44568e-06	3.25507e-06	9.59685e-06	1.09789e-07	2.53053e-08	6.04001e-08	4.38514e-08	9.36127e-09	5	5	121.255	97.3736	14.9331	7.85677	0.120167	0.0779839	2.08116	1.98736	0.052001	0.0338167	-0.311593	-1.45533	-3.50295	0.0129085	0	0	0	0	0	0
tr|K7ER15|K7ER15_HUMAN	K7ER15	tr|K7ER15|K7ER15_HUMAN	>tr|K7ER15|K7ER15_HUMAN Isoform of Q9H0R4, Haloacid dehalogenase-like hydrolase domain-containing protein 2 (Fragment) OS=Homo sapiens GN=HDHD2 PE=1 SV=1	HDHD2	HDHD2	84064	2	541.656	448.332	476.703	543.288	500.904	200.163	236.728	280.923	232.776	198.476	4.0054e-07	2.86507e-06	1.14303e-07	2.09122e-06	7.62795e-07	0.000722027	1.94864e-06	3.08756e-07	4.07687e-08	1.13163e-05	5	5	502.177	229.813	41.2266	33.6527	0.0830006	0.143559	2.69967	2.35777	0.0359848	0.0620292	-1.13576	-1.83392	-11.3503	7.17576e-06	-1	0	0	0	0	0
tr|A0A024R4E5|A0A024R4E5_HUMAN	A0A024R4E5	tr|A0A024R4E5|A0A024R4E5_HUMAN	>tr|A0A024R4E5|A0A024R4E5_HUMAN Isoform of Q00341, High density lipoprotein binding protein (Vigilin), isoform CRA_a OS=Homo sapiens GN=HDLBP PE=1 SV=1	HDLBP	HDLBP	3069	1	70.1536	60.9104	65.6838	58.7266	71.3286	109.609	110.947	84.0026	100.353	113.139	0.000901828	0.0011134	7.77576e-06	0.319962	1.75024e-05	0.000181964	2.53304e-08	1.75687e-06	4.01288e-06	3.48145e-07	5	5	65.3606	103.61	5.53418	11.9967	0.085379	0.123401	1.81406	2.01288	0.0370123	0.0533901	0.660468	1.7535	7.15661	0.000161054	1	1	0	0	0	0
tr|F5GWX2|F5GWX2_HUMAN	F5GWX2	tr|F5GWX2|F5GWX2_HUMAN	>tr|F5GWX2|F5GWX2_HUMAN Isoform of Q9NRV9, Heme-binding protein 1 OS=Homo sapiens GN=HEBP1 PE=1 SV=1	HEBP1	HEBP1	50865	1	232.053	202.368	233.716	182.371	172.934	452.901	329.911	367.919	327.389	367.812	2.41829e-09	6.23071e-09	1.72514e-10	2.12479e-09	2.92445e-07	2.12051e-08	4.51465e-09	1.11068e-09	7.17627e-10	7.24051e-10	5	5	204.689	369.186	27.8531	50.7472	0.137509	0.13155	2.30785	2.56417	0.05944	0.0568867	0.851468	1.75799	7.57002	0.000112075	1	1	0	0	0	0
sp|Q14CZ8|HECAM_HUMAN	Q14CZ8	sp|Q14CZ8|HECAM_HUMAN	>sp|Q14CZ8|HECAM_HUMAN Hepatocyte cell adhesion molecule OS=Homo sapiens GN=HEPACAM PE=1 SV=1	HEPACAM	HEPACAM	220296	1	283.481	307.742	238.008	307.328	350.882	382.335	446.237	394.33	524.329	560.578	6.71839e-09	7.47767e-09	4.41809e-10	5.18224e-08	1.16002e-08	3.34316e-09	3.33927e-09	4.52325e-09	1.08714e-09	9.00644e-10	5	5	297.488	461.561	41.1915	78.7016	0.143228	0.170598	2.47001	2.65922	0.0618876	0.0735591	0.628537	1.59617	4.86944	0.0019762	1	1	0	0	0	0
sp|P31937|3HIDH_HUMAN	P31937	sp|P31937|3HIDH_HUMAN	>sp|P31937|3HIDH_HUMAN 3-hydroxyisobutyrate dehydrogenase, mitochondrial OS=Homo sapiens GN=HIBADH PE=1 SV=2	HIBADH	HIBADH	11112	1	68.1403	53.3536	54.4441	91.1032	41.0626	110.203	118.673	119.136	89.0939	121.264	0.425729	0.295938	0.000262974	0.276239	0.0312739	2.01641e-06	1.93319e-07	2.06046e-06	2.76255e-06	1.37018e-07	5	5	61.6207	111.674	19.067	13.3105	0.305624	0.128663	1.7739	2.04523	0.129779	0.0556486	0.901355	1.58481	4.88719	0.00192933	1	1	0	0	0	0
sp|O75146|HIP1R_HUMAN	O75146	sp|O75146|HIP1R_HUMAN	>sp|O75146|HIP1R_HUMAN Huntingtin-interacting protein 1-related protein OS=Homo sapiens GN=HIP1R PE=1 SV=2	HIP1R	HIP1R	9026	2	275.31	261.485	282.681	257.459	259.007	274.755	282.864	284.284	286.441	282.607	5.04853e-06	2.32897e-05	1.26754e-05	2.86756e-06	4.78857e-06	2.56897e-06	3.30909e-07	7.07258e-06	8.0958e-06	3.47291e-06	5	5	267.188	282.19	11.1814	4.42592	0.0414901	0.0158034	2.42652	2.4505	0.0180112	0.00686292	0.0796657	1.33054	1.67077	0.180806	0	1	0	0	1	0
sp|P62805|H4_HUMAN	P62805	sp|P62805|H4_HUMAN	>sp|P62805|H4_HUMAN Histone H4 OS=Homo sapiens GN=HIST1H4A PE=1 SV=2	HIST1H4A	HIST1H4A	8359	3	779.249	204.402	605.48	894.189	1747.77	1341.61	1537.38	994.65	2173	2117.41	1.2938e-07	1.18477e-05	3.5259e-10	1.09844e-08	1.21135e-08	2.48799e-09	5.64969e-10	4.15193e-09	1.35656e-08	3.09437e-09	5	5	846.217	1632.81	567.771	506.902	0.917429	0.336301	2.83563	3.19499	0.339383	0.142159	1.19375	1.15954	2.53764	0.0524104	0	1	0	0	0	0
[truncated: 1,140 more rows]
[truncated: 16 more columns]
